# Supplementary material for: The Prognostic Value of a Tumor Microenvironment-Based Immune Cell Infiltration Score Model in Colon Cancer
Source: Front Oncol. 2021 Sep 27;11:728842. doi: 10.3389/fonc.2021.728842 (PMC8561118; doi:10.3389/fonc.2021.728842)
Supplement: Supplementary file 11 [file Table_10.xlsx]

## Sheet: Sheet1
id	TCGA-AA-3527-11A-01R-A32Z-07	TCGA-AZ-6600-11A-01R-1774-07	TCGA-AA-3517-11A-01R-A32Z-07	TCGA-A6-5659-11A-01R-1653-07	TCGA-AZ-6605-11A-01R-1839-07	TCGA-A6-2680-11A-01R-A32Z-07	TCGA-A6-2679-11A-01R-A32Z-07	TCGA-AZ-6599-11A-01R-1774-07	TCGA-AA-3712-11A-01R-1723-07	TCGA-AA-3697-11A-01R-1723-07	TCGA-AA-3514-11A-01R-A32Z-07	TCGA-AA-3531-11A-01R-A32Z-07	TCGA-AA-3660-11A-01R-1723-07	TCGA-AA-3663-11A-01R-1723-07	TCGA-AA-3518-11A-01R-1672-07	TCGA-A6-2671-11A-01R-A32Z-07	TCGA-A6-2682-11A-01R-A32Z-07	TCGA-AA-3522-11A-01R-A32Z-07	TCGA-AA-3655-11A-01R-1723-07	TCGA-AZ-6601-11A-01R-1774-07	TCGA-A6-5665-11A-01R-1653-07	TCGA-AA-3534-11A-01R-A32Z-07	TCGA-AA-3489-11A-01R-1839-07	TCGA-A6-2685-11A-01R-A32Z-07	TCGA-A6-2683-11A-01R-A32Z-07	TCGA-AZ-6598-11A-01R-1774-07	TCGA-A6-2678-11A-01R-A32Z-07	TCGA-AA-3520-11A-01R-A32Z-07	TCGA-A6-2686-11A-01R-A32Z-07	TCGA-A6-2675-11A-01R-1723-07	TCGA-AA-3525-11A-01R-A32Z-07	TCGA-AA-3496-11A-01R-1839-07	TCGA-A6-2684-11A-01R-A32Z-07	TCGA-A6-5667-11A-01R-1723-07	TCGA-AZ-6603-11A-02R-1839-07	TCGA-AA-3713-11A-01R-1723-07	TCGA-A6-5662-11A-01R-1653-07	TCGA-AA-3511-11A-01R-1839-07	TCGA-AA-3662-11A-01R-1723-07	TCGA-AA-3672-01A-01R-0905-07	TCGA-AA-3553-01A-01R-0821-07	TCGA-A6-A56B-01A-31R-A28H-07	TCGA-D5-6927-01A-21R-1928-07	TCGA-AA-A00E-01A-01R-A002-07	TCGA-AA-3814-01A-01R-0905-07	TCGA-A6-2676-01A-01R-0826-07	TCGA-AA-A02K-01A-03R-A32Y-07	TCGA-F4-6570-01A-11R-1774-07	TCGA-DM-A1D9-01A-11R-A155-07
ENSG00000218748.1	0.111582	0	0	0	0	0.0590579	0	0	0.0880877	0.145038	0.142689	0.0570598	0	0	0	0	0	0.0565765	0.0858294	0.085643	0	0.164888	0	0	0.0635305	0.0734183	0.13389	0	0	0	0	0	0.155224	0	0	0	0	0.0823277	0.0990731	0	0	0	0	0.554263	0	1.67603	0	0.318607	0.114402
ENSG00000200508.1	0	0	0	0	0	0	0	0	0	0	0	0	0	0	0	0	0	0	0	0	0	0	0	0	0	0	0	0	0	0	0	0	0	0	0	0	0	0	0	0	0	0	0	0	0	0	0	0	0
ENSG00000242958.1	0.0459042	0	0	0	0	0	0	0	0	0	0	0.0938959	0	0	0	0	0	0	0	0	0	0	0	0	0	0	0	0	0	0	0	0	0	0	0	0	0	0	0	0	0	0.183769	0	0	0	0	0	0	0
ENSG00000251920.1	0	0	0	0	0	0	0	0	0	0	0	0	0	0	0	0	0	0	0	0	0	0	0	0	0	0	0	0	0	0	0	0	0	0	0	0	0	0	0	0	0	0	0	0	0	0	0	0	0
ENSG00000207280.1	0	0	0	0	0	0	0	0	0	0	0	0	0	0	0	0	0	0	0	0	0	0	0	0	0	0	0	0	0	0	0	0	0	0	0	0	0	0	0	0	0	0	0	0	0	0	0	0	0
ENSG00000128268.11	2.93995	0.875681	2.98949	1.74249	1.09075	19.4407	3.24118	2.82666	4.33966	3.35499	1.60444	2.20753	5.67299	2.01765	2.53311	3.87854	4.11287	2.12952	3.40235	4.26002	1.44588	5.84104	1.57896	3.11578	3.0572	2.69349	2.93125	2.83518	1.38793	1.81179	5.1514	2.49068	1.55679	5.79131	2.83498	0.681106	1.67991	6.55846	6.08926	3.01713	1.35715	0.159624	2.7915	3.22177	0.915484	1.19782	1.26346	22.1326	0.182599
ENSG00000232385.2	0.16463	0.0951469	0.231547	0.307458	0.129413	0.116179	0.161234	0.372635	0.462099	0.332875	0.163742	0.0187081	0.495053	0.262589	0.266685	0.374984	0.135527	0.370994	0.281408	0.0561593	0.0298792	0.459524	0.302662	0.19394	0.208297	0.240716	0.131695	0.160358	0.101823	0.119308	0.375888	0.126336	0.483485	0.216591	0.266838	0.542035	0.239591	0.161956	0.259864	0.160948	0.213467	0.146459	0.280433	0.363451	0.380165	0.305288	0.165383	0.0783459	0.281317
ENSG00000223390.1	0.0190364	0.0990177	0	0	0	0	0	0.025853	0	0	0	0	0	0	0	0	0	0.0193043	0	0.029222	0	0.0281305	0	0	0	0.0751526	0.0685265	0	0.021193	0.0310406	0	0	0	0	0	0	0	0	0.0676089	0	0	0.0762088	0.0729603	0	0	0	0	0.0815332	0.0195174
ENSG00000241462.1	0	0	0	0	0	0	0	0	0	0	0	0	0	0	0	0	0	0	0	0	0	0	0	0	0	0	0	0	0	0	0	0	0	0	0	0	0	0	0	0	0	0	0	0	0	0	0	0	0.038831
ENSG00000233920.1	0	0	0	0	0	0	0	0	0	0	0	0	0	0	0	0	0.0452327	0	0	0	0	0	0	0	0	0	0	0	0	0	0	0	0	0	0	0	0	0	0	0	0	0	0	0	0	0	0.047312	0	0
ENSG00000232661.1	0	0.113803	0.0639112	0.183872	0	0	0	0.0891402	0	0	0	0	0	0.117779	0	0	0	0	0	0.302269	0	0	0	0	0	0	0	0	0	0.32108	0.103752	0	0	0	0	0	0	0.0968561	0	0	0.191492	0	0.125782	0	0.194874	0	0.593434	0	0.0672954
ENSG00000278077.1	0	0	0	0	0	0	0	0	0	0	0	0	0	0	0	0.1658	0	0	0	0	0	0	0	0	0	0	0	0	0	0	0	0	0	0.203503	0.111428	0	0.112557	0	0	0	0	0	0	0	0	0	0	0	0
ENSG00000158270.11	2.4723	2.36428	3.07696	1.96535	4.74533	1.31794	2.99905	6.84669	3.03915	3.65797	2.10263	1.63312	1.78027	5.10653	2.174	2.283	2.01329	3.38287	2.12819	3.2703	2.02725	3.92205	3.49553	1.60173	1.85433	2.12473	3.18947	2.83163	2.13414	3.81218	2.0555	5.55062	1.68801	2.01825	6.05081	1.4709	3.61419	2.59837	3.55853	0.869425	0.836018	0.617104	1.57168	1.0602	1.34365	3.08718	0.119969	2.67473	0.33027
ENSG00000278105.1	0	0	0	0	0	0	0	0	0	0	0	0	0	0	0	0	0	0	0	0	0	0	0	0	0	0	0	0	0	0	0	0	0	0	0	0	0	0	0	0	0	0	0	0	0	0	0	0	0
ENSG00000274297.1	0.148018	0.171092	0.0720631	0.345542	0	0.104456	0.108723	0.20102	0.116851	0.0641326	0.220829	0.100922	0.0476892	0.0442672	0	0.0892444	0.182777	0.0500337	0.113855	0.113608	0.201482	0.0364549	0.0408182	0	0	0.259711	0.0592031	0.0480588	0.0274644	0.160904	0.116986	0	0.102955	0.109538	0	0	0.0403902	0.0728068	0	0	0.143945	1.28388	0.141826	0	0.0732436	0.0823446	0.159316	0.176101	0.101172
ENSG00000234752.1	0	0	0	0	0	0	0	0	0	0	0	0	0	0	0	0	0	0	0	0	0	0	0	0	0	0	0	0	0	0	0	0	0	0	0	0	0	0	0	0	0	0	0	0	0	0	0	0	0
ENSG00000219627.1	0	0	0	0	0	0	0	0	0	0	0	0	0	0	0	0	0	0	0	0	0	0	0	0	0	0	0	0	0	0	0	0	0	0	0	0	0	0	0	0	0	0	0	0	0	0	0	0	0
ENSG00000169032.8	13.6297	12.9131	13.8087	13.956	10.2597	10.829	13.4185	12.7193	11.8931	15.5144	12.4602	10.2574	11.2344	13.4196	12.0959	11.4426	12.1559	12.5811	12.3184	11.5512	9.36676	14.2561	12.9232	13.556	13.5694	11.177	13.0855	12.7987	13.3953	12.7294	14.1211	13.9034	12.1429	11.4344	14.1231	12.8675	11.7768	15.1642	12.0332	11.2726	16.1894	11.123	18.7612	16.5232	12.1331	19.4756	10.088	12.8477	8.8387
ENSG00000125850.9	7.86977	11.1356	7.77327	6.53909	0.764374	4.13704	7.33841	6.15002	7.83434	6.50172	6.66081	8.45115	9.57915	5.40927	6.77092	7.96987	9.7014	9.70515	7.31543	5.07794	7.29892	8.68259	3.70776	9.75797	7.32106	6.17862	7.07433	9.38705	7.12786	4.09984	7.21083	3.83847	10.7344	9.95989	3.32942	6.23099	4.95736	6.79062	8.77583	5.51603	3.48287	4.67239	3.55302	4.57171	5.50468	8.0809	4.85832	7.68392	7.33016
ENSG00000243601.1	0	0.05175	0	0	0	0	0	0	0	0.0775925	0	0	0	0	0	0	0	0	0	0	0	0	0	0	0	0	0	0	0	0	0	0	0	0	0	0	0	0	0	0	0	0	0	0	0	0	0	0	0
ENSG00000281779.1	0	0	0	0	0	0	0	0	0	0	0	0	0	0	0	0	0	0	0	0	0	0	0	0	0	0	0	0	0	0	0	0	0	0	0	0	0	0	0	0	0	0	0	0	0	0	0	0	0
ENSG00000100314.3	0.0845685	0.0540207	0.0520075	0.0374063	0.0818727	0.249714	0.0588488	0.0664928	0.0562204	0.0347131	0.0512263	0.0591783	0.0774382	0.111816	0.0648913	0.0966106	0.0824432	0.0225681	0.0753213	0.102488	0.0581632	0.0986597	0.235666	0.0367038	0.0304104	0.16986	0.0801122	0.0346837	0.0198209	0.0943503	0.0422139	0.122963	0.0619182	0.0658777	0.129857	0.108616	0.269632	0.0394082	0.0632317	0.234977	0.129855	0.0356374	0.0511774	0.0442186	0.0264297	0.0297138	0.0977307	0.101673	0.0136904
ENSG00000272137.1	0.0307977	0.0533981	0.029988	0.258826	0.0435772	0	0	0	0.0486259	0	0	0.094494	0	0	0.0408185	0.0371378	0.0760602	0.0312312	0.0473793	0	0	0.182042	0	0	0.0701399	0	0	0	0.10286	0.0502185	0.0486819	0.0709017	0.0428432	0.0455829	0.149754	0.0536822	0.0504235	0.0908926	0.10938	0	0	0	0	0	0.274314	0.1028	0.0397782	0.263815	0.063152
ENSG00000137054.14	4.45219	7.39897	6.14567	3.59122	6.37317	3.6187	4.76756	5.66218	4.40368	5.08905	4.66694	2.54543	7.02147	6.28968	5.67888	5.37569	5.6546	5.84999	7.44447	5.98342	3.4051	6.43405	8.08318	4.97273	5.392	5.99564	7.22005	5.81033	4.62228	6.52526	5.70491	7.83021	5.78383	4.84603	8.23646	6.34121	6.16427	6.62948	8.17274	7.82455	9.01317	14.5178	16.5769	10.5557	7.40646	7.4594	8.47276	9.80236	15.5117
ENSG00000265630.2	0	0	0	0	0.202215	0.0756406	0	0	0	0	0	0.0730815	0.138134	0	0	0.086167	0	0	0	0.109691	0	0	0	0	0.0813692	0.0940333	0.171485	0.0696024	0.079552	0.116517	0	0	0	0.105761	0.115819	0.124553	0	0	0.126892	0	0	0	0	0	0	0	0.0922933	0.102017	0.0732625
ENSG00000065135.8	4.07456	4.45645	3.63583	4.25887	2.74632	2.62868	3.67083	3.51169	3.00213	5.0069	4.86643	3.60871	3.52192	3.35446	3.29694	3.20949	3.76911	3.90618	3.70449	3.14251	3.6456	3.47555	4.38704	3.40834	4.19969	3.4196	3.48896	3.92099	3.8462	3.24146	3.74221	3.92886	3.43225	2.92723	3.70831	4.75093	3.91891	3.525	3.28457	3.01536	4.78733	2.7717	4.57672	4.47588	3.90829	6.21314	3.81206	4.23121	4.66517
ENSG00000214009.2	0	0	0	0	0.0263816	0	0.0273905	0.0253213	0	0	0.0238427	0.0190688	0	0	0.0247115	0	0	0	0	0	0	0	0	0	0	0.0245357	0	0.0363221	0	0	0	0	0	0	0	0	0	0	0	0	0.0543956	0	0.0714598	0	0.0553563	0	0.0240817	0	0
ENSG00000260995.1	0	0	0	0	0	0	0	0	0	0	0	0	0	0	0	0	0	0	0	0	0	0	0	0	0	0	0	0	0	0	0	0	0	0	0	0	0	0	0	0	0	0	0	0	0	0	0	0	0
ENSG00000273269.1	0.0295132	0	0.0287373	0	0.0208798	0.0468618	0	0	0.0232989	0.0191811	0.0943521	0	0	0.0264793	0	0.0177944	0	0.0149643	0.0227016	0.0226523	0	0	0	0.0173838	0.0336072	0	0.0177067	0	0	0	0	0.0339722	0	0	0	0	0	0	0.0262045	0	0	0	0	0	0	0	0.0190596	0	0
ENSG00000119778.13	1.34937	1.9105	1.14562	1.99848	0.665121	1.46935	1.13536	1.66169	1.80743	1.09442	1.26587	1.0308	1.10112	1.14615	1.06096	0.94695	1.44089	1.55904	1.03368	1.5132	1.70729	1.38313	0.894437	1.18732	1.39959	1.58285	1.53951	1.29954	1.25597	1.21285	1.33091	1.00897	1.00396	1.5388	1.23921	1.07962	1.16122	1.86469	1.2472	0.389269	0.661499	2.09215	1.43864	1.04387	1.12881	0.849126	1.09106	1.03824	1.95755
ENSG00000196199.12	9.80356	11.1626	10.3895	11.5984	12.4363	9.4259	10.5137	12.9767	12.0654	9.67543	9.42798	9.3157	8.94118	12.5608	9.81854	9.17567	11.5726	11.609	10.6232	13.3966	10.5549	11.8867	10.8237	12.2596	10.7897	11.4299	12.4519	9.88042	10.5455	13.5215	10.5367	11.7988	10.6182	13.1881	16.422	8.25285	14.1141	14.3007	13.1027	3.12249	9.42165	24.436	12.842	11.2231	14.8387	7.18629	17.7883	15.2629	15.3301
ENSG00000004468.11	1.83252	2.92413	1.75138	2.16961	0.143719	0.779512	3.57495	1.17826	1.98123	1.87312	3.09837	0.941425	0.78131	1.46948	1.02929	1.30137	1.90227	1.52571	1.11009	1.15965	1.09225	2.45468	1.85216	1.47076	1.36144	0.87438	1.20355	1.49847	1.00829	0.434758	4.46877	0.998674	1.21281	1.08366	2.37	1.67087	0.751806	3.34115	1.11228	0.893701	4.88946	0.0931848	0.636655	0.946007	0.929825	0.967666	0.136656	1.25072	0.0694257
ENSG00000204655.10	0.00907742	0	0.00883878	0	0.0256882	0.0384356	0	0	0.00716608	0.0117991	0	0	0	0.0162886	0.0060155	0.0109461	0.00560456	0	0.00698236	0.0278688	0	0	0.0450584	0.0106935	0	0.0238908	0.0054461	0	0	0.0740078	0	0.0313467	0	0	0.00735649	0	0.022293	0.0066975	0	0	0	0.0181699	0.00869771	0	0	0	0	0	0
ENSG00000252511.1	0	0.295888	0	0	0	0	0	0	0	0	0	0	0	0	0	0	0	0	0	0.523934	0	0	0	0	0.194329	0.224574	0	0	0	0	0	0.392879	0	0	0	0	0	0	0	0	0	0	0	0	0	0	1.10209	0	0
ENSG00000233384.1	0.0359943	0.0624082	0.0350481	0	0	0	0	0.0488834	0.0568308	0.0467866	0	0	0	0	0	0	0.0444471	0	0.0553738	0	0	0	0	0.0424026	0	0	0	0	0.0400721	0.117384	0	0	0.100145	0.0532743	0	0	0	0	0.0639181	0	0.105012	0.864582	0.206932	0	0.3206	0	0.0929804	0.359717	0.295232
ENSG00000255053.1	0	0	0	0	0	0	0	0	0	0	0	0	0	0	0	0	0	0	0	0	0	0	0	0	0	0	0	0	0	0	0	0	0	0	0	0	0	0	0	0	0	0	0	0	0	0	0	0	0
ENSG00000168675.17	1.33294	1.53523	1.12513	1.19053	1.76113	2.41517	1.58943	1.52696	1.83944	1.17907	1.0504	0.832115	1.10264	1.64012	1.35482	1.39234	1.19707	1.10331	1.47936	1.40972	1.00947	1.52973	1.01968	1.18483	1.22512	1.53425	1.7386	1.21489	1.14958	1.72468	1.32986	1.54031	0.819977	1.32591	1.62317	0.878064	1.86067	1.64253	1.92436	0.670182	0.535342	1.14001	0.597126	0.45574	1.75517	0.239796	0.105086	0.616625	0.951315
ENSG00000124789.10	8.40273	11.7035	8.35282	8.29562	5.94642	5.27368	7.64043	8.9483	8.30274	8.25179	9.09947	7.10532	6.03142	7.3296	7.3937	6.28316	9.84427	9.54801	6.51335	9.21337	7.25759	9.23182	6.22914	7.97451	8.73835	7.27462	8.41998	8.51038	7.15058	7.68425	8.65833	7.23275	6.16417	8.33146	7.69675	5.581	6.90822	10.5287	8.42401	4.72004	12.4082	28.3421	11.9443	5.97464	10.449	10.3261	11.8534	8.75086	9.85813
ENSG00000241678.1	0.0302833	0.157519	0.0884616	0.254504	0.0428494	0.128226	0.355905	0.164509	0.0956276	0	0.116177	0.0309719	0.117082	0.0543406	0.12041	0	0.112185	0.0921288	0.046588	0.0929736	0.148398	0.0895009	0.0501067	0	0.137937	0.199256	0.109013	0.0589949	0.0674282	0.0493798	0.43082	0	0	0	0.490842	0.0527857	0	0.134062	0.107553	0	0.265051	0.969872	0.0580331	0.300852	0	0	0	0.0864695	0.21734
ENSG00000275943.1	0	0.249015	0	0	0	0	0	0	0	0	0	0	0.277636	0	0	0	0	0	0	0	0	0	0	0	0	0	0	0	0	0	0	0	0	0	0	0	0	0	0	0	0	0	0	0	0	0	0	0	0.441751
ENSG00000265049.1	0	0.273375	0	0	0	0	0	0	0	0	0	0	0	0	0	0	0	0	0	0	0	0	0	0	0	0	0.189193	0	0	0	0.24923	0	0	0	0	0	0	0	0	0	0	0	0	0	0	0	0.203647	0	0
ENSG00000272659.1	0.251908	0.254781	0.551893	0.646879	0.0891094	0.888859	0.462586	0.256585	0.464022	0.218292	0.268446	0.429394	0.243484	0.226013	0.222582	0.379708	0.49252	0.149015	0.290652	0.128898	0.651506	0.434293	0.347339	0.420405	0.406375	0.303873	0.629729	0.265819	0.210335	0.17115	0.597287	0.0966561	0.350434	0.248562	0.0680502	0.292727	0.309327	0.21684	0.410056	0	0.551198	0.252118	0	0	0.31163	0.280281	0.081341	0.179822	0.236751
ENSG00000237352.2	0.116418	0.04037	0.0680146	0.0652259	0.0658904	0.0492939	0.171026	0.0948635	0	0.0302648	0.0297747	0.0238131	0.04501	0.0417803	0.0308596	0.0280769	0.0575029	0.0472228	0.107459	0.0714837	0.114097	0.0344068	0.115575	0.0548579	0.0265135	0.0612801	0	0.0226794	0.0518429	0	0.0368045	0.053603	0.0971708	0	0.113217	0.0405848	0.0381211	0.103075	0.289427	0	0.339645	0	0.0892388	0	0.0691288	0	0.0601462	0.0997244	0.214848
ENSG00000221372.1	0	0	0	0	0	0	0	0	0	0	0	0	0	0	0	0	0	0	0	0	0	0	0	0	0	0	0	0	0	0	0	0	0	0	0	0	0	0	0	0	0	0	0	0	0	0	0	0	0
ENSG00000255447.1	0	0	0	0.0866434	0	0.0654799	0	0	0	0	0	0	0	0	0	0	0	0	0	0	0	0	0	0	0	0	0	0	0	0	0	0	0	0	0	0.0539112	0	0	0	0	0	0	0	0	0	0	0.0399479	0	0
ENSG00000261796.1	0	0.010333	0.00290147	0.00834752	0.00843257	0.00630856	0	0.00404683	0.00940953	0	0	0.00609513	0.00576032	0.00534699	0.00789874	0.00718648	0.0110387	0.012087	0.00458415	0	0.00486735	0.00440334	0.0147912	0	0.00339317	0.0196064	0.00357554	0	0	0.0145766	0.00471019	0	0	0.00441034	0.00965955	0	0	0.00439713	0.0052915	0.0262185	0.00869346	0.0119291	0	0	0	0	0.00769743	0.0085084	0.00305511
ENSG00000160392.12	2.43994	3.31213	2.61337	1.93384	2.56824	1.76071	2.52658	2.72365	2.34431	3.50413	2.53416	2.17892	2.49639	2.41871	2.54763	2.56907	2.59038	2.3747	2.87929	2.79082	2.16772	2.51949	2.9146	2.77267	1.98893	3.13252	2.48143	2.28967	2.00414	2.8335	2.83146	2.32222	2.4215	2.69525	2.88406	2.8111	2.09482	2.99453	2.3302	4.42456	2.89945	3.65699	2.54315	3.90201	2.65029	4.10193	3.7817	2.82923	2.27279
ENSG00000216105.1	0	0	0	0	0	0	0	0	0	0	0	0	0	0	0	0	0	0	0	0	0	0	0	0	0	0	0	0	0	0	0	0	0	0	0	0	0	0	0	0	0	0	0	0	0	0	0	0	0
ENSG00000279187.1	0.0701324	0.0810652	0.00569072	0	0.0496169	0.117545	0.00858574	0.0714343	0.0461378	0.0151934	0.0597893	0.00597726	0.0225957	0.0419486	0.00774598	0.014095	0.0577346	0.0237065	0	0.0717717	0.0381857	0.0690909	0.00967007	0.0275394	0.0266204	0.107672	0.063115	0.0398489	0.0325324	0.0476489	0.0554291	0	0.0325208	0.0346004	0.0189455	0	0.0191374	0.0431209	0.0415133	0.154269	0.0852534	0.116984	0.100798	0	0.0173518	0.0195079	0.05284	0.0500631	0.0419444
ENSG00000197085.10	0.00204133	0	0	0.00571851	0	0	0	0.0027723	0	0	0	0	0	0	0	0	0.00252071	0.00207007	0	0	0	0	0	0	0	0.00268629	0.00489888	0	0.00454519	0	0.00645347	0	0.00567946	0	0.00330866	0	0	0	0	0	0.148888	0	0.0782378	0	0.133335	0.177158	1.89834	0.139889	0.0334867
ENSG00000256197.1	0	0	0	0	0	0	0	0	0	0	0	0	0	0	0.0342091	0	0.0318722	0	0	0.0396213	0	0.0381414	0	0	0	0	0	0	0	0	0	0	0	0	0	0	0	0	0	0	0	0	0	0	0	0	0	0	0
ENSG00000252064.1	0	0	0	0	0	0	0	0	0	0	0	0	0	0	0	0	0	0	0	0	0	0	0	0	0	0	0	0	0	0	0	0	0	0	0	0	0	0	0	0	0	0	0	0	0	0	0	0	0
ENSG00000008516.15	2.45395	0.822907	1.55758	1.06366	0.119388	0.896889	4.72059	0.70664	2.84759	1.31153	2.78739	0.906098	1.35925	2.59913	1.68212	1.77632	2.07514	2.12841	1.47653	0.890471	1.57923	2.94569	1.49498	1.63179	1.14497	0.805004	1.53555	2.48958	1.00198	0.504473	3.03981	0.906497	1.85848	2.16465	1.26503	1.5075	1.9513	0.944195	1.42343	2.90775	1.00517	0.98521	1.42156	0.908099	0.793289	2.35874	0.812812	0.813119	0.15139
ENSG00000271425.5	0.0927755	0.143825	0.100964	0.122305	0.103474	0.0508369	0.0978102	0.118585	0.156821	0.0595869	0.0362897	0.0625125	0.0506388	0.10772	0.086797	0.077654	0.138823	0.101829	0.0503739	0.127337	0.0944917	0.135484	0.0307012	0.102864	0.075816	0.122088	0.0864392	0.0818627	0.0874893	0.124583	0.0672865	0.0728703	0.0576981	0.182548	0.127375	0.0513677	0.11973	0.125629	0.0833437	0.0672251	0.0254747	0.126716	0.0690241	0.0108434	0.0648115	0.0364324	0.0648484	0.0810302	0.0973581
ENSG00000104522.14	25.1067	15.7625	13.9879	12.0269	8.29608	18.4498	22.2747	25.0139	23.9841	54.7274	28.6387	19.1977	30.2167	16.2556	13.0842	19.1725	21.0673	13.9951	27.2877	21.7999	13.1816	20.311	55.7155	17.1213	20.2438	24.1376	12.456	18.0068	17.9816	13.015	25.4994	19.4172	15.8057	21.9022	47.185	27.9161	14.3795	26.7122	24.9483	84.7119	63.5147	52.668	60.9988	98.6318	34.1018	84.4318	44.1025	47.2338	53.1411
ENSG00000266174.1	0	0	0	0	0	0	0	0.249367	0	0	0	0	0	0	0	0	0	0	0	0	0	0.271335	0	0	0	0	0	0	0	0	0	0	0.255432	0	0.297612	0	0.300626	0	0.326063	0	0	0	0	0	0	0	0	0	0
ENSG00000274395.1	0.0142913	0	0.0139156	0	0	0.0151281	0	0	0.0225643	0	0	0.0146163	0	0	0	0.0172334	0.0176475	0.0144925	0	0.0219381	0.0233441	0	0.0236464	0	0.0325477	0	0.034297	0.027841	0.0159104	0	0.0225903	0	0.0397618	0.0634568	0.162147	0	0.0935939	0.0210889	0	0	0	0	0	0	0	0	0	0	0
ENSG00000172071.10	7.98695	7.09064	7.74319	7.2911	1.49196	3.10266	7.24314	6.74672	10.1912	6.67246	7.667	10.1861	8.26685	6.15042	6.31888	6.85641	8.64953	8.88441	5.19494	6.82276	6.71061	7.82627	5.17654	7.89631	8.17386	4.03976	7.31591	7.71209	6.81447	4.70098	8.10581	4.85495	5.29545	7.70438	5.53819	5.86276	4.97803	8.79607	7.17213	1.7146	3.65255	2.96019	5.51456	9.38799	3.92313	3.70669	2.72379	3.29659	4.4064
ENSG00000276748.1	0	0	0	0	0	0	0	0	0	0	0	0	0	0	0	0	0	0	0	0	0	0	0	0	0	0	0	0	0	0	0	0	0	0	0	0	0	0	0	0	0	0	0	0	0	0	0	0	0
ENSG00000271200.1	0.101914	0	0.0992344	0	0.0480676	0	0	0	0	0	0	0	0	0.121916	0.0450247	0.0409646	0	0.0344494	0	0	0.05549	0.251001	0	0	0.0386837	0.0447044	0	0.0330897	0.0756396	0	0.161095	0	0	0.0502799	0.0550617	0	0	0.100259	0.120651	0	0.297329	0.407993	0.130201	0.33749	0	0	0.175509	0.0484999	0.139319
ENSG00000243053.2	0.0382737	0	0.0372675	0	0	0.0405146	0	0.103958	0	0	0	0	0	0	0	0	0.0472617	0	0	0	0	0.0565579	0	0.0450877	0	0.0503661	0	0	0	0.0624087	0	0	0.0532431	0	0	0	0	0.0564781	0	0	0.111662	0	0	0	0	0.127754	0.0988683	0	0.0784817
ENSG00000234147.1	0.4483	0.0555198	0.717131	0.179407	0	0.203378	0.61154	0.347903	1.01116	0.582715	0.327587	0.261997	1.05232	0.574594	0.254643	0.888109	0.197706	0.227305	0.344833	0.147465	0.0523052	1.04102	2.06632	0.264057	0.255244	0.0421386	0.806888	0.249524	0.106947	0.417711	0.253081	0.368595	0.133637	0.236971	0.467113	2.1768	0.262135	0.189008	0.568631	1.69049	0.467106	0	0	1.90872	0.190142	1.49638	14.6824	7.58889	0.196984
ENSG00000164729.7	0	0	0	0	0	0	0	0	0	0	0	0	0	0	0	0	0	0	0	0	0	0	0.0119766	0	0	0	0	0	0	0	0	0	0	0	0	0	0.0237021	0	0	0	0	0	0	0	0	0	0	0	0
ENSG00000230364.1	0.088517	0.0575526	0.0646424	0.092988	0.125247	0.0585623	0.113782	0.165294	0.122288	0.230114	0.0990445	0.0226324	0.0641676	0	0.102653	0.0533696	0.0956409	0.31417	0.0510655	0.0679395	0.0722936	0.196206	0.164767	0.078207	0.0629975	0.0873628	0.185873	0.161662	0.0862269	0.0180419	0.209878	0.152836	0.200098	0.0491294	0.161405	0.0192863	0.0543466	0.0816369	0.0589451	0.292063	0.0645611	0.177181	0.0636107	0.549612	0	0.369326	0.014291	0.0157967	0.0340327
ENSG00000150967.16	0.471482	0.622565	0.403827	0.382173	0.222375	0.544145	0.606057	0.530629	0.596221	0.470985	0.361474	0.667494	0.390311	0.634522	0.458543	0.523796	0.567378	0.536777	0.319011	0.420515	1.05003	0.761232	0.216698	0.455138	0.500845	0.376289	0.466213	0.612329	0.506671	0.314992	0.538252	0.424626	0.58301	0.482988	0.339642	0.642999	0.346655	0.475099	0.44382	0.595378	0.592241	0.227199	0.771757	0.46623	0.625384	0.163933	0.260784	0.26177	0.309956
ENSG00000216560.4	0.597744	0	1.03547	0.350476	0.0196693	0.0147149	0.336954	0.641878	1.41565	0.126483	0	3.02824	0.228415	0.18708	3.07682	2.08696	0.643705	0.648448	0	0.0426779	0.692549	1.07845	0.0115003	0.0491276	0.419478	0.868918	0.675545	1.02906	0.0232138	0.192669	0.09888	0.0160013	0.889545	0.0822982	0	0.0363455	0.455188	0.153847	0	0	0	0	0	0.138101	0.123816	0	0.0359091	0	0
ENSG00000221259.1	0	0	0	0	0	0	0	0	0	0	0	0	0	0	0	0	0	0	0	0	0	0	0	0	0	0	0	0	0	0	0	0	0	0	0	0	0	0	0	0	0	0	0	0	0	0	0	0	0
ENSG00000171587.13	0.0152211	0.00293232	0.00329354	0.018951	0.0598253	0.0125318	0.0198762	0.00689052	0	0.0197849	0.00432543	0.0138375	0.00653871	0.0242781	0.0156907	0.0142758	0.00417679	0.0120053	0.0104072	0.0103846	0.0221003	0.00249918	0.0559662	0.017931	0.00385168	0.0422859	0.00811739	0.00494204	0.00188283	0.0413657	0.00267333	0.0506157	0	0.00250315	0.0575654	0	0.0332276	0.0124783	0.00600653	0.0446421	0.0049341	0.00677056	0.00648196	0	0	0.0169355	0.00436879	0	0.0104038
ENSG00000237279.2	0	0.0636721	0	0.102875	0	0	0	0	0	0	0	0.0375584	0	0.0658965	0	0	0	0	0	0	0	0	0	0	0	0	0	0.0357704	0	0	0	0	0	0	0	0	0	0	0	0	0	0	0	0	0	0	0	0	0
ENSG00000270289.1	0	0	0	0	0	0	0	0	0	0	0	0	0	0	0	0	0	0	0	0	0	0	0	0	0	0	0	0	0	0	0	0	0	0	0	0	0	0	0	0	0	0	0	0	0	0	0	0	0
ENSG00000253834.1	0	0	0	0	0	0	0	0	0	0	0	0	0	0	0	0	0	0	0	0	0	0	0	0	0	0	0	0	0	0	0	0	0	0	0	0	0	0	0	0	0	0	0	0	0	0	0	0	0
ENSG00000232287.2	0.0248386	0.0430659	0	0	0.0702906	0	0	0.0674657	0.0392171	0	0	0	0	0	0	0	0.0306715	0.0251882	0	0	0	0	0	0	0	0.0326862	0	0.024194	0	0.0405015	0	0.0571827	0	0.0367629	0	0	0	0.0366527	0.0882158	0	0	0	0.0475991	0	0	0	0.0320814	0.0709228	0
ENSG00000130119.14	3.47375	4.22575	3.23513	3.76693	1.77581	2.9773	3.81914	4.58069	4.62656	3.48115	4.07676	2.41243	2.77271	3.72994	3.49015	2.77006	3.94358	4.84648	2.44791	4.26594	3.45026	4.47917	2.30833	3.26056	4.19807	3.41371	3.53627	3.97847	3.29344	4.43092	3.44513	2.28307	2.86046	4.18776	3.45087	2.77356	3.33905	4.54726	3.46239	6.3101	9.75856	9.98132	7.78426	7.73699	12.6091	7.23755	5.96296	4.33546	2.48159
ENSG00000278756.1	0	0	0	0	0	0	0	0	0	0	0	0	0	0	0	0	0	0	0	0	0	0.274814	0	0	0	0	0	0	0	0	0	0	0	0	0.301428	0	0	0.274426	0	0	0	0	0	0	0	0	0	0	0
ENSG00000249382.2	0	0	0	0	0	0	0	0	0	0	0	0	0	0	0	0	0	0	0	0	0	0	0	0	0	0	0	0	0	0	0	0	0	0	0	0	0	0	0	0	0	0	0	0	0	0	0	0	0
ENSG00000265499.1	0	0	0	0	0	0	0	0	0	0	0	0	0	0	0	0	0	0	0	0	0	0	0	0	0	0	0	0	0	0	0	0	0	0	0	0	0	0	0	0	0	0	0	0	0	0	0	0	0
ENSG00000276817.1	0	0	0	0	0	0	0	0	0	0	0	0	0	0	0	0	0	0	0	0	0	0	0	0	0	0	0	0	0	0	0	0	0	0	0	0	0	0	0	0	0	0	0	0	0	0	0	0	0
ENSG00000148688.12	3.15179	3.65393	3.46962	3.17016	3.53771	2.39252	3.2883	3.61569	3.9328	4.66816	3.50422	2.24143	5.0502	3.77599	3.04105	2.82321	3.49543	3.91063	4.58015	3.46474	2.83129	3.43668	5.48833	3.49624	3.8517	3.52402	3.51257	3.45869	3.96698	2.97377	3.29672	4.39234	3.65592	3.29449	3.70381	5.5807	4.15986	4.40709	4.80525	0.740609	6.80318	5.72848	4.00868	3.34487	5.88669	3.65247	4.60235	2.79063	3.99855
ENSG00000255097.1	0	0	0	0	0	0	0	0	0	0	0	0	0	0.0463977	0	0	0	0	0	0	0	0	0	0	0	0	0	0	0.0287862	0	0	0	0	0	0	0	0	0	0	0	0	0	0	0	0	0	0	0	0
ENSG00000266222.1	0	0	0	0	0	0	0	0	0	0	0	0	0	0	0	0	0	0	0	0	0	0	0	0	0	0	0	0	0	0	0	0	0	0	0	0	0	0	0	0	0	0.174388	0	0	0	0	0.112526	0	0.0446615
ENSG00000245910.7	19.4379	20.794	24.7148	23.104	29.2813	21.007	22.1642	18.1044	21.1396	24.0412	17.3893	12.825	21.7674	18.2225	20.1814	23.2991	18.5011	24.3238	26.5748	17.1066	13.3577	25.2344	41.3235	13.5527	19.4453	25.0129	21.6211	21.3469	18.3895	17.716	25.007	36.9297	22.4932	14.5139	26.1887	32.6851	27.3109	23.774	23.59	34.3899	106.02	39.5368	38.0298	34.9003	54.8442	58.3974	61.7357	28.3156	102.007
ENSG00000266775.1	0	0	0	0	0	0	0	0	0	0	0	0	0	0	0	0	0	0	0	0	0	0	0	0	0	0	0	0	0	0	0	0	0	0	0	0	0	0	0	0	0	0	0	0	0	0	0	0	0
ENSG00000087494.14	0.176113	0.655387	0.196578	0.240662	1.11224	0.277364	0.151447	0.0875037	0.196678	0.469002	0.0659152	0.342663	0.249108	0.578083	0.250496	0.3574	0.185646	0.113254	0.601339	0.883566	0.30872	0.12695	1.56359	0.156866	0.0733696	0.32785	0.22163	0.142255	0.439951	0.791465	0.115427	0.474666	0.0717055	0.222515	0.772804	0.262053	0.703271	0.380312	0.404272	0.113383	0.664184	0.498686	0.576207	0.213367	0.612149	0.0143378	0.0998637	0.386347	0.136524
ENSG00000112337.9	0	0	0	0	0	0	0	0	0	0	0	0.0577708	0	0	0	0	0	0	0	0	0	0	0	0	0	0	0	0	0	0	0	0	0	0.00836041	0	0	0	0	0	0.149102	0	0	0	0	0	0	0	0	0
ENSG00000189045.12	1.47396	3.35136	1.71452	2.65795	0.199816	0.158829	1.6078	1.38445	2.09031	0.734237	0.835213	0.880114	3.41238	1.33036	1.60846	0.89934	1.95088	2.09886	2.39654	1.23293	2.16254	2.04768	0.576845	1.73118	1.30656	1.59702	2.29817	1.42282	1.77851	0.698002	1.34631	1.09724	0.902444	2.09666	0.937021	3.01535	1.2572	1.348	2.17075	0.0776584	0.321872	0.759676	0.389018	0.0876838	1.23162	0.279876	3.24894	0.0819053	3.77802
ENSG00000119285.9	2.40934	4.05232	2.34756	2.3037	2.35892	0.990976	2.90599	3.59428	2.78407	3.21508	2.43529	1.34764	1.88408	2.92824	2.2797	1.88469	2.83855	3.65431	2.25401	3.78953	2.06071	3.32819	2.55421	2.56257	3.178	2.82882	2.94295	2.89487	2.64481	3.65419	2.68086	2.51687	1.96462	2.57188	3.41927	2.2493	2.07864	3.81315	3.31061	1.69254	7.6184	8.41963	7.84263	5.39869	4.48329	5.2009	8.22178	5.21341	7.16578
ENSG00000241777.1	0	0	0.436836	0.418925	0	0	0	0.406185	0.236111	0.194381	0	0.305888	0.57817	0	0	0	0	0.151648	0.230058	1.37735	0	0.883937	0	0.528502	0	0.393583	0.717762	0	0.33297	0.731533	0	0	0.208032	0.221335	0.48477	0	0.24484	0.662017	0.531113	0	0	0	0	0	0	0	0	0	0
ENSG00000147676.12	65.7748	66.1978	103.478	97.739	7.58163	29.8461	36.6243	56.4178	65.4566	105.692	85.5122	105.886	126.047	63.0011	92.1985	94.0023	67.4761	123.13	101.617	58.9074	108.496	62.2753	81.6458	91.3398	100.788	46.9984	91.8393	100.186	115.722	58.5806	76.415	54.9503	113.58	78.1353	35.7743	108.384	86.6821	59.1857	87.8585	15.7028	183.246	61.982	49.9551	84.4483	75.1856	87.9864	37.3018	82.7291	73.581
ENSG00000264233.1	0	0	0	0	0	0	0	0	0	0	0	0	0	0	0	0	0	0	0	0	0	0	0	0	0	0	0	0	0	0	0	0	0	0	0	0	0	0	0	0	0	0	0	0	0	0	0	0	0
ENSG00000248552.1	0	0	0	0	0	0	0	0	0	0	0	0	0	0	0	0	0	0	0	0	0	0	0	0	0	0	0	0	0	0	0	0	0	0	0	0	0	0	0	0	0	0	0	0	0	0	0	0	0
ENSG00000230715.3	6.15503	11.4207	8.65687	11.0916	7.84325	7.23935	7.98457	16.4737	22.3345	7.06477	5.20126	6.9208	6.33189	10.3987	6.53573	6.64084	10.934	9.85526	5.53738	17.8469	11.0534	14.2548	3.27559	7.84447	5.57429	17.952	11.0567	5.25904	6.21118	11.9145	11.1517	3.72894	9.2133	19.1255	9.80126	2.00769	7.24859	9.98555	12.9754	2.21693	4.72553	28.9635	6.00103	4.64866	6.09139	5.16625	24.9652	10.4318	14.7247
ENSG00000230424.1	0.371942	0.595278	0.835761	0.641195	0.769176	0.817724	0.966717	0.699408	0.948637	0.706597	0.292696	0.673013	0.719006	0.924111	0.455042	0.724516	1.16588	1.0735	0.968331	1.09799	0.420608	0.803301	0.89945	0.741501	0.456117	0.753008	0.755278	0.5295	1.05112	0.419874	0.633153	1.05388	0.875623	0.465808	0.927469	1.04728	0.796333	0.802167	1.5242	0.503478	0.250413	0.916309	0.438625	0.568475	0.339781	0.191	0.665167	1.06202	1.87737
ENSG00000257285.4	0.381343	0.127151	0.285629	0.410877	0.124519	0.108681	0.323202	0.497978	0.810514	0.190647	0.243827	0.180007	0.226825	0.315824	0.174954	0.229924	0.271671	0.312344	0.383585	0.202634	0.167704	0.476825	0.388289	0.380122	0.283928	0.733441	0.404784	0.285729	0.179615	0.143496	0.301395	0.202597	0.346861	0.217083	0.285274	0.178959	0.360204	0.324649	0.703229	0	0.171162	1.17434	0.562141	0.582845	0.130639	0.3427	0.284159	0.649133	0.300754
ENSG00000181577.14	0.299965	0.173363	0.0937538	0.19711	0.0890791	0.199925	0.277457	1.46857	0.152023	0.221427	0.0710351	0.287848	0.0859063	0.0664517	0.0785317	0.049122	0.114323	0.0300432	0.165217	0.420672	0.181472	0.0437793	1.33578	1.02084	0.160246	0.229046	0.0355491	0.0649291	0.325702	1.11713	0.275127	0.170512	0.0412135	0.093179	2.521	0.0580952	0.0727581	0.109294	0.131524	25.9695	5.2292	33.4164	19.9773	7.50526	16.1516	6.61321	5.83064	3.8014	2.9008
ENSG00000123836.13	8.08576	12.7911	9.28189	14.8484	1.84174	8.03968	9.7824	12.8725	15.3427	7.54237	10.238	7.35012	7.28187	7.57109	10.7883	8.16872	11.8817	11.6141	6.5763	10.104	12.4478	11.4398	4.97346	12.1044	12.8181	12.065	15.0075	11.4024	13.6579	7.19306	9.16763	7.52912	9.77987	12.2118	6.41449	9.98033	7.65796	11.1214	8.17963	1.95259	3.48203	6.45804	12.7008	2.96781	5.22872	2.16523	4.57319	4.57163	7.61627
ENSG00000279872.1	0	0	0	0	0	0	0	0.084188	0	0	0	0.0633998	0	0	0	0	0	0	0	0	0	0	0	0	0	0	0	0	0	0	0	0	0	0	0.100476	0	0	0	0.110081	0	0	0	0	0	0	0	0.0800664	0	0
ENSG00000245651.2	0.0301967	0.013089	0.0073507	0.0211479	0	0.00399559	0.0221804	0.0205048	0.0297981	0.014719	0.0144806	0.00772082	0.0656703	0.0135463	0.0300164	0.0136549	0.0233049	0.0306217	0.0174205	0.0347653	0.0184967	0.027889	0.0249816	0.0444659	0.0128946	0.0248358	0.0362336	0.0220598	0.0378198	0.0123096	0.0357989	0.00868975	0.0315053	0.0279333	0.0122359	0.0131586	0.0123599	0.0334195	0.0335142	0	0.0110122	0.120887	0	0	0.0224133	0	0.0487524	0.00538887	0.116099
ENSG00000228985.1	0	0	0	0	0	0	0	0	0	0	0	0	0	0	0	0	0	0	0	0	0	0	0	0	0	0	0	0	0	0	0	0	0	0	0	0	0	0	0	0	0	0	0	0	0	0	0	0	0
ENSG00000103319.10	6.54385	4.44681	7.3105	8.26902	8.85743	7.93025	6.31588	6.47742	9.3239	5.28739	6.37672	8.1984	5.32504	6.73771	8.35903	7.14507	5.88957	10.1814	4.84155	8.24885	9.73473	8.09576	6.2756	6.24722	8.0283	6.70249	10.0636	8.79998	10.1123	7.3554	5.18337	7.6533	6.62993	8.83945	8.742	1.91051	10.2638	7.26496	8.36043	4.05811	7.85185	5.45955	5.62196	5.60621	5.42368	5.43351	6.38223	7.27671	3.11354
ENSG00000252261.1	0	0	0	0	0	0	0	0	0	0	0	0	0	0	0	0	0	0	0	0	0	0	0	0	0	0	0	0	0	0	0	0	0	0	0	0	0	0	0	0	0	0	0	0	0	0	0	0	0
ENSG00000231183.3	0	0	0	0	0	0	0	0	0	0	0	0	0	0	0	0	0	0	0	0	0	0.0220757	0	0	0	0	0	0	0	0	0.023614	0	0	0	0	0	0	0	0	0	0	0	0	0	0	0	0.0192951	0	0
ENSG00000236763.2	0	0	0	0	0	0	0	0	0	0	0	0	0	0	0	0	0	0	0	0	0	0	0	0	0	0	0	0	0	0	0	0	0	0	0	0	0	0	0	0	0	0	0	0	0.227268	0	0	0	0
ENSG00000112874.8	6.12718	4.76831	5.39837	11.8867	3.02818	5.9615	5.39677	6.49953	4.45391	6.35217	6.04242	6.76631	9.4144	3.60441	6.9907	3.3285	3.97031	6.56545	12.1689	3.79225	4.93263	7.94865	10.0153	7.9446	7.67946	5.91202	6.81832	6.55909	8.17959	5.5725	3.00466	10.1022	5.57927	3.06779	5.13491	14.3399	5.43523	6.30121	10.1743	0.682046	4.14938	1.83496	4.16581	2.61163	1.1107	0.0899974	5.65897	7.55914	3.01316
ENSG00000224605.1	0	0	0	0	0	0	0	0	0	0	0	0	0	0	0	0	0	0	0	0	0	0	0	0	0	0	0	0	0	0	0	0	0	0	0	0	0	0	0	0	0	0	0	0	0	0	0	0	0
ENSG00000279751.1	0	0	0	0	0	0	0	0	0	0	0	0	0	0	0	0	0	0	0	0	0	0	0	0	0	0	0	0	0	0	0	0	0	0	0	0	0	0	0	0	0	0	0	0	0	0	0	0	0
ENSG00000217483.1	0	0	0	0	0	0	0	0	0	0	0	0	0	0	0	0	0	0	0	0	0	0	0	0	0	0	0	0.0236276	0	0	0	0	0	0	0	0	0	0	0	0	0	0	0	0	0	0	0	0	0
ENSG00000206172.7	0.24321	0.512046	0.253731	0.632652	0.835743	0.5149	0.535935	0.283114	0.0822855	0.0903233	0.0666454	0.24874	0.0335823	0.12469	0.161172	0.377071	0.729358	0.26425	0.0267253	1.17336	0.31214	0.0770136	0.201207	0.900458	0.514331	1.1659	0.250142	0.13537	2.68829	0.62319	0.0823803	0	0.2175	0	0.450517	0.211964	2.0763	0.0769049	0	4.27986	0	0	0.0665817	2.07102	1.03155	2.31945	0.269253	0.0248017	0
ENSG00000276647.1	0	0	0	0	0	0	0	0	0	0	0	0	0	0	0	0	0	0	0	0	0	0	0	0	0	0	0	0	0	0	0	0	0	0	0	0	0	0	0	0	0	0	0	0	0	0	0	0	0
ENSG00000213540.3	0.0294234	0	0.0286498	0	0	0.0311461	0	0	0.046456	0.0382454	0	0	0	0	0	0	0	0.0895125	0	0.0451667	0	0	0	0	0	0	0	0	0	0.095955	0.093019	0	0	0.0435488	0.0476904	0	0	0.0434183	0.0522495	0	0	0	0.0563851	0	0	0.589273	0.0380031	0	0
ENSG00000244422.3	0	0.118077	0	0	0	0	0	0	0	0	0	0	0	0	0	0.0821216	0	0.207182	0	0	0	0.100636	0	0	0.077549	0	0	0	0	0	0	0	0	0	0	0.118706	0	0	0	0.59921	0.198684	0	0	0	0.202194	0	0	0.0972274	0.0698229
ENSG00000252908.1	0	0	0	0	0	0	0	0	0	0	0	0	0	0	0	0	0	0	0	0	0	0	0	0	0	0	0	0	0	0	0	0	0	0	0	0	0	0	0	0	0	0	0	0	0	0	0	0	0
ENSG00000241963.3	0	0	0	0	0	0	0	0.0661074	0	0	0	0	0	0	0	0	0	0	0	0	0	0	0	0	0	0	0	0	0	0	0	0	0	0	0	0	0	0	0	0	0	0	0	0	0	0	0	0	0
ENSG00000256525.5	1.10891	1.13578	1.42161	1.89506	1.15104	0.883776	1.30199	2.03512	2.52823	1.20209	0.892441	0.775057	1.82086	1.7824	1.28246	0.851878	1.5385	1.5804	1.71912	1.91913	1.29381	2.1195	1.51601	1.35677	1.32612	2.02269	1.54124	1.34704	1.23454	1.13098	2.07094	1.29124	1.39372	2.10386	1.92921	1.36571	1.35291	1.81957	2.21248	1.05481	3.80978	4.91924	3.56089	1.48872	2.92369	2.14368	4.7226	2.5245	1.92708
ENSG00000266149.1	0	0	0	0	0	0	0	0.063961	0	0	0	0	0	0.0422551	0	0	0.0290782	0.0238797	0	0	0.0384647	0	0	0.0277406	0	0	0	0	0.052432	0.0383976	0	0	0.0655167	0.0348531	0	0.041046	0	0.0347487	0	0	0	0.0942712	0	0	0	0	0.0304148	0	0
ENSG00000144908.12	4.84934	2.45782	1.6337	2.72644	0.989421	0.202688	5.92733	1.18384	2.60062	1.22794	3.76079	0.940205	1.23928	1.29272	4.87368	0.386526	2.98493	3.06385	0.393844	0.535893	2.26886	3.70337	0.619632	0.9571	2.25387	3.29097	4.98231	2.42461	5.98995	0.871114	0.889609	1.7803	0.351722	0.518263	2.57713	2.43771	0.519606	0.875753	1.12339	0.70741	0.33641	0.00847011	1.44544	0.157645	0.621887	4.26558	0.336125	0.00604126	1.20284
ENSG00000231651.1	0.541707	0.88705	0.380948	0.25292	0.0851654	0.445997	0.221056	0.490456	0.665227	0.625892	0.461816	0.184675	0.872653	0.540023	0.518531	0.326612	0.371622	0.488295	0.324086	0.277185	0.344107	0.355775	0.248974	0.38998	0.445505	0.237619	0.469449	0.234511	0.335043	0.19629	0.380567	0.346418	0.711712	0.17817	0.292672	0.996685	0.295636	0.710546	0.213768	0.529592	0	0.361438	0.519047	0.89694	0.446755	0.200907	0.194352	0.214828	0.277698
ENSG00000259002.2	0.0657359	0.0379917	0.0960116	0.0920749	0	0.104377	0.12876	0.133912	0.0345964	0.0569637	0.0560412	0.179282	0.0847167	0.0196595	0.0871248	0.0528456	0.081173	0.055551	0.101128	0.0840906	0.0357919	0.0809496	0.0362555	0.103252	0.0873305	0.11534	0.0394389	0.032015	0.0243944	0.107188	0.0173181	0.0252226	0.015241	0.0810783	0.0532734	0.114582	0.0896883	0.0970024	0.0194554	0	0	0	0.0419908	0	0	0	0.0283014	0.0312831	0.0112328
ENSG00000168374.9	81.9084	97.3358	65.3585	84.6539	42.5446	61.8995	70.9998	70.7833	107.833	136.969	78.1229	86.5379	137.397	66.6025	70.9011	74.6321	99.1761	70.4658	134.814	98.9967	69.7588	76.3994	150.167	118.999	82.4433	64.1441	69.5089	77.3163	69.9482	93.4267	74.9815	78.011	70.1021	100.671	98.7024	115.08	73.4723	117.535	142.325	25.3788	94.555	76.3092	86.468	130.947	92.5738	82.377	46.0772	92.6299	118.921
ENSG00000197852.9	0.660456	0.660376	0.468182	0.586456	1.99898	0.773471	0.684533	0.742877	0.919098	0.840925	0.468059	0.701719	0.759777	0.891873	0.494064	0.724757	0.748842	0.520462	0.843589	1.09885	0.359605	0.532893	0.840262	0.679392	0.553674	0.734047	0.858942	0.545964	0.51274	0.96902	0.486765	1.37434	0.471598	0.647684	1.37478	0.633285	0.995089	0.880922	0.997742	0.653607	0.271887	0.302791	0.854125	1.00634	0.437088	0.761895	1.11122	0.327803	0.274182
ENSG00000212251.1	0	0	0	0	0	0	0	0	0	0	0	0	0	0	0	0	0	0	0	0	0	0	0	0	0	0	0	0	0	0	0	0	0	0	0	0	0	0	0	0	0	0	0	0	0	0	0	0	0
ENSG00000236104.2	7.40174	6.63796	9.75451	7.4628	8.9232	7.46926	9.20977	9.61169	9.70515	7.65811	6.22854	8.70664	11.42	9.15027	8.90097	12.0545	9.86876	8.98339	11.6895	7.01971	8.15575	10.0498	8.38455	9.60273	8.39823	9.09655	10.617	8.46825	7.48256	7.95945	8.71612	9.3892	9.02439	12.6393	8.61853	8.1655	10.151	11.3225	10.3017	10.0589	4.62291	8.8767	6.28713	5.38821	5.0203	5.36013	7.16319	5.26846	6.9782
ENSG00000231188.1	0.184786	0	0	0.172551	0	0	0.135731	0.0418259	0	0.0400318	0	0.125992	0	0.110527	0.122456	0.0742756	0.15212	0.0624624	0.0947585	0	0.150919	0	0.0509578	0	0.14028	0.0405282	0.0369548	0.119994	0.137147	0	0.146046	0	0.0856864	0.0455829	0.0499179	0.536822	0.0504235	0	0	0	0	0	0.0590188	0	0.182876	0	0.0397782	0.0439691	0
ENSG00000253188.1	0.0843356	0	0	0	0	0	0.0619471	0.0572674	0	0.054811	0	0	0.0815152	0	0	0	0	0	0	0	0.0688786	0.0623124	0	0.0496751	0	0	0	0.0410735	0	0.0687584	0.0666546	0	0.0586603	0	0	0.073501	0.207117	0	0	0	0.246045	0	0.161616	0	0	0	0.0544638	0	0.0432334
ENSG00000211788.2	1.2894	0.5589	2.11866	0.564385	0.285068	0.810405	1.65743	0.383055	0.699808	2.3045	1.18512	0.618148	1.16838	1.59067	0.587447	0.631652	0.945364	0.449469	1.11578	1.23707	0.526539	1.90537	1.66674	3.08537	1.05531	0.689317	3.38445	0.863457	1.0766	0.394215	2.35661	1.02039	1.00896	0.715651	0.261237	1.26422	2.57286	1.60539	2.00348	0	0.822885	0.161309	0.926596	1.6012	1.07668	0.806977	0.0520432	0.862893	0.0826238
ENSG00000107187.14	0	0.00814195	0	0	0	0	0	0	0	0.00610391	0	0	0	0	0	0	0	0	0	0	0	0	0	0	0	0.00617959	0	0	0.00522793	0	0.0148457	0	0	0.00695032	0	0	0	0	0	0	0	0.0375986	0	0	0.0139421	0.0313491	0.0303262	0.0201128	0.00962919
ENSG00000253651.1	0.0319509	0.0553975	0	0	0	0	0	0	0.100893	0.0415308	0	0.0326774	0	0.0573329	0.127041	0	0.118362	0.129603	0	0	0.05219	0	0	0	0	0.0840915	0.0766772	0.0311218	0	0	0.0505048	0.22067	0.0444474	0.0472897	0.0517871	0.111385	0	0	0	0	0.0932154	0.38373	0	0	0	0.106649	0.0412677	0.0456155	0.131033
ENSG00000254019.1	0	0	0	0	0	0.0262929	0	0	0	0	0	0	0	0	0	0	0.061343	0.0251882	0	0.0381287	0	0	0	0.0292607	0	0	0	0.024194	0.055305	0	0	0	0	0.0367629	0	0	0	0	0	0	0.0724654	0	0.0475991	0	0.14749	0.58036	0	0.106384	0.0254662
ENSG00000199885.1	0	0	0	0	0	0	0	0	0	0	0	0	0	0	0	0	0	0	0	0	0	0	0	0	0	0	0	0	0	0	0	0	0	0	0	0	0	0	0	0	0	0	0	0	0	0	0	0	0
ENSG00000277717.1	0	0	0	0	0	0	0	0	0	0	0	0	0	0	0	0	0	0	0	0	0	0	0	0	0	0	0	0	0	0	0	0	0	0	0	0	0	0	0	0	0	0	0	0	0	0	0	0	0
ENSG00000203585.3	0.107967	0.121128	0.117497	0.0889574	0.00898637	0.114289	0.10263	0.0603765	0.28077	0.033021	0.0406078	0.181872	0.2701	0.0113963	0.143097	0.229753	0.180376	0.115927	0.136786	0.0682444	0.186732	0.0375402	0.0945753	0.0822988	0.202497	0.0585032	0.137173	0.0927931	0.0989873	0.144983	0.180703	0.0731057	0.08835	0.141	0.0411757	0.0996318	0.0623891	0.506078	0.0902242	0	0	0	0.0121707	0.0630947	0	0.021199	0	0.108806	0.013023
ENSG00000187902.10	0.0429234	0.0248073	0.0116097	0	0.0539862	0.0277668	0.0175159	0.00647706	0.00376505	0.0123985	0.00609884	0.0121943	0.00921954	0	0.0158027	0.0143777	0.00883388	0.00725459	0.00733705	0.00366056	0.00779031	0.00704766	0.00789121	0.0252826	0.00814628	0.0282425	0.0171682	0.0116138	0.0132739	0.0311069	0.0113082	0.0274492	0.0066346	0.024706	0.0386509	0	0.0351381	0.0140754	0.0211729	0	0.00695706	0.0381858	0	0	0.00707993	0.0159193	0.00923995	0.00680896	0.00488979
ENSG00000250682.4	0	0.0204975	0	0	0.0334554	0	0	0	0	0	0	0.0483637	0	0.0424273	0	0.0142558	0	0	0	0	0	0.0174698	0	0	0	0	0.0141856	0.0115153	0	0	0.0186872	0.0272165	0	0.0174976	0	0.0206066	0.0193557	0	0.0209935	0	0	0	0	0	0	0	0.0610776	0	0
ENSG00000221628.1	0	0	0	0	0	0	0	0	0	0	0	0	0	0	0	0	0	0	0.148771	0	0	0	0	0	0	0	0	0	0	0	0	0	0	0	0	0	0	0	0	0	0	0	0	0	0	0	0	0	0
ENSG00000226652.2	0.306929	0.46275	0.558738	0.373834	0.0377642	1.79401	0.803774	0.181233	1.05349	0.364264	0.494884	1.02361	0.619126	0.359188	1.48569	1.11034	1.63138	1.61037	0.328473	0.266305	1.78742	0.552155	0.397443	0.786027	0.790187	0.245853	0.576454	1.02688	1.14395	0.500475	0.42188	0.307219	1.22523	0.849301	0.194666	0.72108	0.546216	0.905832	0.402855	0.469666	0.311461	0.106846	0.358022	0	0.198101	0.178173	0.120652	0.49535	0.109456
ENSG00000211965.3	193.844	101.193	127.572	87.61	3.77166	31.2022	182.545	79.5156	132.621	123.645	94.7299	82.4514	55.4833	120.857	199.527	461.143	261.985	139.933	62.2263	83.5019	32.453	280.218	50.7716	133.967	182.121	12.6443	79.2555	223.382	101.829	25.5229	386.66	115.383	59.3732	58.8577	36.4727	112.429	51.5079	174.763	63.0215	18.8175	51.0008	0	54.7048	15.0883	81.7173	13.76	1.24103	193.908	0.0953352
ENSG00000172342.5	0	0	0	0	0	0	0	0	0	0	0	0	0	0	0	0	0	0	0	0	0	0	0	0	0	0	0	0	0	0	0	0	0	0	0	0	0	0	0	0	0	0	0	0	0	0	0	0	0
ENSG00000212384.1	0	0	0	0	0	0	0	0	0	0	0	0	0	0	0	0	0	0	0	0	0	0	0	0	0	0	0	0	0	0	0	0	0	0	0	0	0	0	0	0	0	0	0	0	0	0	0	0	0
ENSG00000200796.1	0	0	0	0	0	0	0	0	0	0	0	0	0	0	0	0	0	0	0	0	0	0	0	0	0	0	0	0	0	0	0	0	0	0	0	0	0	0	0	0	0	0	0	0	0	0	0	0	0
ENSG00000245008.3	0.00643269	0.0223064	0.0250543	0	0	0	0.00945002	0.00873614	0	0.00836141	0	0	0.0124351	0	0.00852574	0	0	0.00652323	0	0.00987458	0	0	0	0	0.0146501	0	0.00771872	0	0.00716145	0	0.0101682	0	0	0	0	0.0224251	0	0	0	0	0	0	0	0	0	0	0	0	0
ENSG00000165028.10	0.339666	0.381068	0.466921	0.335833	0.603118	0.599256	0.185898	0.47034	0.441652	0.328967	0.153303	0.313331	0.334744	0.525841	0.238333	0.256998	0.296069	0.276908	0.491805	0.511184	0.39164	0.393672	0.661188	0.407983	0.288192	0.517097	0.391589	0.350313	0.333658	0.521276	0.8001	1.18062	0.231625	0.295724	0.798825	0.441141	0.621542	0.452084	0.626826	0.0586004	0.233167	0.746552	0.140393	0.132331	0.31638	0.0222308	0.541937	0.0855762	1.13352
ENSG00000227230.1	0	0.10872	0.0814085	0	0.118299	0.0221254	0.0307058	0.0567723	0.198007	0.0543371	0	0.0641306	0.0404052	0.0750119	0	0	0.02581	0.0847833	0	0.0320853	0.102425	0	0	0.0246228	0.0238011	0.0550109	0.0250803	0	0.0232695	0.272656	0.0660783	0.0962383	0.0581531	0.0618719	0.203268	0	0.0684422	0.0616865	0.0371167	0	0	0.0836759	0.160218	0	0	0	0	0.0298407	0.128579
ENSG00000236985.1	0	0	0	0	0	0	0	0	0	0.022635	0	0	0	0	0	0	0	0	0	0	0	0	0	0	0	0.0229157	0	0	0	0	0	0	0	0	0.0282249	0	0	0	0	0	0	0	0	0	0	0	0	0.0248613	0
ENSG00000105401.5	49.5322	53.7498	51.4952	37.8296	37.3713	36.4966	53.5233	47.9252	50.4073	86.4254	52.4099	45.497	52.7537	49.7301	40.8029	49.9045	58.7962	50.3406	52.4098	54.5513	42.1915	55.1993	59.9436	70.2972	50.2002	52.6652	48.1705	51.1275	45.5477	48.5347	52.9686	49.9438	51.9243	58.5841	61.6351	46.6775	45.609	59.6333	55.8973	101.82	76.5681	146.104	100.67	71.4618	60.6283	76.7119	100.911	66.4187	92.393
ENSG00000239513.4	0	0	0	0	0	0	0	0	0	0	0	0	0	0	0	0	0	0	0	0	0	0	0	0	0	0	0	0	0	0	0	0	0	0	0	0	0	0	0	0	0	0.200706	0	0	0	0	0.0107924	0.059647	0.00856699
ENSG00000250507.1	0	0	0.0132375	0.0380841	0	0	0	0	0	0	0	0	0	0	0	0	0	0	0	0	0	0	0	0	0	0	0	0	0	0	0.0214894	0	0	0.0402428	0	0	0.0222582	0.0401222	0	0	0	0	0	0.135059	0	0	0	0	0
ENSG00000135407.9	2.67502	3.02797	1.34312	2.03558	0.735396	0.894342	1.50895	5.4895	2.38012	1.17183	1.72928	0.803624	0.557111	2.79783	2.77822	1.06038	2.98384	1.9833	0.644194	1.83764	2.06002	1.76172	0.570582	1.39283	3.27049	2.07451	2.45318	3.16943	2.31994	0.755094	1.78325	1.5481	1.86406	1.89941	1.12586	1.83332	1.94787	2.06092	0.901062	0.780224	0.582086	1.02554	1.61906	0.342591	0.789822	0.287766	0.849447	1.42424	1.55314
ENSG00000261741.4	0	0.0208718	0	0	0	0.0127428	0.0176845	0	0.0190065	0.0156473	0	0	0	0	0	0	0	0	0	0	0	0	0	0	0	0	0	0	0	0	0	0	0	0	0	0	0	0.0177637	0	0	0	0	0	0	0	0.0401814	0	0	0.0123421
ENSG00000261167.1	0.538796	1.05005	0.691374	0.549922	0.975123	0.614555	0.54609	0.73173	0.791344	0.656912	0.566156	0.337463	0.581333	0.749471	0.725178	0.513727	0.706584	0.76239	0.430506	0.910435	0.477569	0.635719	0.635791	0.728206	0.661098	0.769487	0.651524	0.655	0.585886	0.885366	0.448945	0.682702	0.482254	0.531638	0.683745	0.436815	0.745376	0.770415	0.704608	0.440996	0.828605	0.401297	0.696348	0.705396	0.892842	0.474009	0.717486	0.67978	0.560976
ENSG00000171489.9	0.0198166	0	0	0	0	0	0	0.0269126	0	0	0	0	0	0	0	0	0.0244702	0	0	0.0304196	0	0.0292834	0	0	0	0	0.0237783	0.0193023	0.0220616	0.0323127	0	0	0	0	0	0	0	0	0.0351899	0	0	0	0	0	0	0	0	0	0.0406347
ENSG00000010270.12	5.65816	5.9984	5.24629	5.1776	5.02264	7.02772	4.97457	5.7632	7.3112	6.1708	5.06403	5.24772	9.26754	6.51327	5.16454	5.31435	5.47911	5.20665	9.85932	5.59752	4.36502	5.41309	12.8838	5.8166	5.29577	4.73707	6.37302	4.9589	5.02894	5.35291	5.67429	7.99537	4.96125	5.80685	5.86162	13.2935	7.3029	6.31621	9.39007	2.78864	8.80851	9.10866	5.25526	7.42416	14.0553	5.71268	10.1089	5.03447	9.26611
ENSG00000235833.1	0	0	0	0	0	0	0	0.0574902	0	0	0	0	0	0	0	0	0	0	0	0	0	0	0	0	0	0	0	0	0	0	0	0	0	0	0	0	0	0	0	0	0	0	0	0	0	0	0	0	0
ENSG00000160336.13	1.58166	2.03808	1.58203	2.32746	0.949177	1.32899	1.71328	2.41131	2.81791	1.67591	1.34577	1.37529	2.27233	1.9878	2.01472	1.33211	2.16968	2.34035	2.42849	2.07367	1.57325	2.41001	2.22497	2.00462	2.33017	1.84652	2.24864	1.72045	1.93213	1.79128	1.65378	2.30235	1.61382	1.81266	2.31921	2.60138	2.20667	3.17854	3.10922	2.30138	2.62142	6.54131	2.77743	8.80424	4.40356	4.5707	3.99035	4.20866	6.26567
ENSG00000156042.16	0.0800666	0.138822	0.0874692	0.131295	0.0746057	0.0888889	0.0889343	0.185649	0.184998	0.0431522	0.0549397	0.0459367	0.109477	0.0841006	0.129413	0.0588715	0.120572	0.18219	0.0751065	0.170871	0.105265	0.155831	0.0613922	0.0598134	0.102292	0.179889	0.164028	0.068478	0.0891373	0.0668701	0.114214	0.0899157	0.135832	0.144518	0.212071	0.129349	0.0767349	0.15273	0.228876	0.103095	0.216499	0.0469072	0.130981	0.0582021	0.0869693	0.0651839	0.103414	0.0947928	0.522572
ENSG00000116260.15	28.449	30.5258	30.4089	18.954	15.4328	12.629	32.7165	38.3611	52.4814	46.1604	22.5779	49.8157	57.8563	23.7592	34.5031	48.3333	35.8186	30.0849	44.2095	48.8725	18.8999	36.8185	28.0198	56.8384	31.0437	27.4553	35.1461	28.8686	27.7852	33.8447	31.2281	26.2	23.1396	51.3415	54.5955	13.2545	27.175	63.0432	63.1816	31.4864	19.8213	21.5358	58.8559	78.4385	16.5035	31.2373	12.5802	38.1582	33.3432
ENSG00000225155.4	0.0660853	0	0.032174	0	0	0.0349773	0	0.0448747	0	0.0429499	0	0	0	0	0	0	0	0.0670155	0	0.0507225	0	0.0976559	0	0	0	0	0	0.0321852	0	0	0.104461	0	0	0.0489056	0	0.0575953	0	0.048759	0	0	0.289201	0	0.126642	0.328265	0	0.992637	0	0	0
ENSG00000231721.5	0.298789	0.65174	0.425452	0.423008	0.622792	0.360495	0.415341	0.453776	0.588422	0.354967	0.201314	0.262867	0.608647	0.524618	0.281038	0.271192	0.420529	0.306253	0.6969	0.572091	0.341113	0.455771	0.893065	0.287642	0.270726	0.88785	0.354668	0.278518	0.293294	0.408622	0.553551	0.702657	0.129611	0.375657	0.729034	0.896012	0.646995	0.630541	0.890012	0.508831	0.768599	0.964636	0.855793	1.30862	1.55481	0.343166	4.41935	0.380705	1.66346
ENSG00000122483.16	0.430047	0.638473	0.403697	0.634821	0.174897	0.23988	0.488011	0.807864	0.658664	0.575725	0.632261	0.30024	0.438067	0.429737	0.242324	0.208052	0.483339	0.579726	0.372389	0.695726	0.487934	0.479472	0.42608	0.688626	0.466244	0.792965	0.451134	0.421395	0.498835	0.352715	0.761185	0.248993	0.293749	0.628879	0.546776	0.673291	0.489071	0.987991	0.434423	0.271894	0.766309	1.01029	1.21397	1.35589	0.435795	0.954104	1.55658	0.779407	1.82174
ENSG00000213786.3	0	0	0	0	0	0.0333805	0	0.0428261	0	0	0	0	0	0.0565851	0	0	0	0.031978	0	0	0	0	0	0.0371483	0.0359086	0	0.0378385	0.0307158	0	0	0.0996921	0	0	0	0	0	0.0516293	0	0	0	0.0919995	0	0	0.313279	0	0.210516	0	0	0.0323311
ENSG00000281744.1	0	0	0	0	0	0	0	0	0	0	0	0	0	0	0	0	0	0	0	0	0	0	0	0	0	0	0	0	0	0	0	0	0	0	0	0	0	0	0	0	0.261233	0	0	0	0	0	0	0	0
ENSG00000270072.1	0.0337342	0	0	0.0945017	0.0477322	0	0	0.0458139	0.0532623	0.0438488	0.0431387	0	0	0	0	0	0.0416562	0.0342091	0	0.103568	0.110206	0	0	0	0	0.088785	0.0404784	0.0328588	0	0	0	0	0	0	0.0546776	0	0	0	0	0	0	0	0	0	0	0	0.043571	0	0.0691734
ENSG00000218512.2	0	0	0	0	0	0	0	0	0	0	0	0	0	0	0.158889	0.144561	0	0.243139	0	0	0	0	0	0.141225	0	0	0.143849	0	0	0	0	0	0.16677	0	0	0	0	0	0	0	0	0.479926	0	0	0	0	0	0	0
ENSG00000120820.11	1.89803	2.79108	2.06835	2.12434	6.25597	1.8918	1.81111	3.36664	3.01076	2.78992	0.550081	1.17469	2.22032	3.6366	2.11005	2.2032	1.81257	1.9832	3.63627	2.18519	1.39804	2.50332	3.63209	1.5359	2.01488	2.38683	2.53822	1.90061	2.10812	4.03495	1.84359	5.99287	1.45591	2.20537	6.42591	2.72091	4.77748	2.66992	3.75636	0.390192	2.52289	3.05357	2.82993	1.49792	4.7004	0.636503	0.446766	2.58947	1.44585
ENSG00000174498.12	0.0130635	0.00452999	0.0127201	0	0.0998147	0.0553136	0.00767644	0.0354827	0.0247509	0.0169804	0.0133643	0.00801633	0.0202026	0.0515707	0.0207769	0.0220539	0.00322626	0.00794843	0.0442133	0.012032	0.0170708	0.0231651	0.0259378	0.00307785	0.00595027	0.0309436	0.00313504	0.0152694	0.0116348	0.034082	0.0123897	0.0421043	0.00363457	0.0309359	0.0762256	0.0136623	0.0256658	0.019277	0.0231979	0.413791	0.00762244	0.0313785	0.00500682	0.0519122	0.00775706	0	0.0101237	0	0.00267873
ENSG00000117906.12	3.35026	3.66501	3.00419	4.58719	3.19786	2.03988	3.13511	4.53027	4.18098	4.50344	2.83827	2.15004	5.26735	3.87878	3.11631	3.01687	3.11796	3.42971	5.90243	3.45376	2.52102	3.42317	7.09325	3.82221	3.62376	3.33991	3.23654	3.28024	3.35425	3.16584	3.36877	4.85638	2.48538	3.04504	4.11372	7.39426	4.34028	4.3947	4.33216	1.2102	7.16382	5.03681	6.60612	7.83901	5.84603	5.61074	3.93261	4.02448	5.15387
ENSG00000177369.7	0.0113017	0.00979762	0.0110046	0.0158301	0.023987	0	0.0249043	0.00767432	0.035688	0	0	0	0	0.0101399	0	0.00681414	0.00697786	0.0114608	0.00869328	0.0260232	0	0	0	0.00665689	0.00643473	0.00743622	0.00678057	0.0165126	0.0125821	0	0.00893229	0.0130092	0.00786098	0.00836367	0	0	0.00925183	0.0333544	0	0	0.0329722	0	0.0216579	0	0	0.0188619	0.00729862	0	0
ENSG00000259464.2	0	0	0	0	0	0	0	0	0	0	0	0	0	0	0	0	0	0	0	0	0	0	0	0	0	0	0	0	0	0	0	0	0	0	0	0	0	0	0	0	0	0	0	0	0	0	0.0426778	0	0
ENSG00000273600.1	0	0	0	0	0	0	0	0	0	0	0	0	0	0	0	0	0	0	0	0	0	0	0	0	0	0	0	0	0	0	0	0	0	0	0	0	0	0	0	0	0	0	0	0	0	0	0	0	0
ENSG00000257023.1	0.370216	0.145884	0.311326	0.612836	0.0476215	0.0178133	0.321378	0.0914153	0	0	0.279751	0.120474	0	0.301962	0.111517	0.0202922	0.166238	0.153584	0	0	0.274875	0.198937	0	0.0198239	0.172461	0.088579	0.0201923	0.213087	0.655704	0	0.1862	0.038741	0.397964	0.0249067	0.0272753	0.439983	0.110206	0.024832	0	0	0	0.0673678	0	0.167179	0.049962	0	0.108675	0.0480498	0.103519
ENSG00000263571.1	0.0180644	0	0	0	0	0	0	0	0	0.0234807	0	0	0	0	0	0	0	0	0	0	0	0	0.0597786	0	0	0	0	0	0	0	0	0	0.0502594	0	0	0	0	0	0	0	0	0	0	0	0	0	0	0	0
ENSG00000135346.7	0	0	0.00618405	0	0	0.0134457	0	0	0.020055	0.033021	0.00812155	0.0129909	0	0	0	0	0	0	0.00977042	0	0	0	0.0105084	0.0149634	0	0	0	0	0	0	0	0.0146211	0	0	0.0308818	0	0	0.0374872	0.022556	0.223523	0.0370576	0.0508503	0	0	0.0377121	0	0	0	0.013023
ENSG00000237863.2	0.00968339	0	0	0	0.027403	0	0	0	0	0	0	0.00990357	0	0	0	0.0116768	0	0	0.0297939	0	0	0	0.0961326	0	0.0110267	0	0	0.0094321	0	0.047369	0	0.0668786	0	0	0.0313903	0	0	0	0	0	0	0	0	0	0	0	0	0	0.0099281
ENSG00000223802.6	0.0502463	0.120626	0.131722	0.0541377	0.229695	0.0777367	0.119239	0.12073	0.0427177	0.0803836	0.0148278	0.0632478	0.0373584	0.152582	0.0665952	0.102537	0.0286366	0.0705511	0.0535147	0.148329	0.0568207	0.0342693	0.211041	0.0500854	0.0352101	0.254313	0.0602916	0.0865904	0.0473327	0.189072	0.0366574	0.124574	0.0483912	0.0171619	0.20047	0.0404226	0.126563	0.0399244	0.0892265	0.17004	0.09021	0.0154732	0.0148137	0	0.332787	0.0129013	0.0599058	0.286941	0.0198139
ENSG00000275569.1	0.182298	0.180614	0.152148	0.145909	0.221094	0.523781	0.0765163	0.247576	0.0822363	0.033851	0.166514	0.159808	0.352403	0.327117	0.241614	0.25123	0.160791	0.290501	0.080128	0.199885	0.340312	0.192419	0.04309	0.122716	0.326207	0.0342707	0.0624981	0.0761003	0.231943	0.297254	0.123496	0.119909	0.0362283	0.23127	0.0844214	0.0453938	0.255829	0.0768589	0.046246	0	0	0	0.0499064	0	0.15464	0.0869275	0.0672731	0.0743607	0
ENSG00000236880.1	0	0	0	0	0	0	0	0	0	0	0	0	0	0	0	0	0	0	0	0	0	0	0	0	0	0.0569814	0	0	0	0	0	0	0	0	0	0	0	0	0	0	0	0	0	0	0	0	0	0	0
ENSG00000264525.1	0	0	0	0	0	0	0	0	0	0	0	0	0	0	0	0	0	0	0	0	0	0	0	0	0	0	0	0	0	0	0	0	0	0	0	0	0	0	0	0	0	0	0	0	0	0	0	0	0
ENSG00000237546.1	0	0	0	0	0	0	0	0	0	0.0168952	0	0	0	0	0	0	0	0	0	0	0	0	0	0	0	0	0	0	0	0	0	0	0	0	0	0	0	0	0	0	0	0	0	0	0	0	0	0	0
ENSG00000187952.9	0.258611	0.428007	0.240366	0.0658602	0.11643	0.136876	0.846175	0.574716	0.538234	0.152796	0.150321	0.276514	0.340858	0.274213	0.155798	0.893022	0.406435	0.369535	0.289344	0.144358	0.422426	0.555863	0.0583495	0.553913	0.147243	0.278442	0.352628	0.3664	0.157041	0.306683	0.297299	0.0541243	0.588694	0.347967	0.19053	0.0614692	0.115475	0.190808	0.52186	0	0.0685896	0.329415	0.360426	0.350344	0	0.0784743	0.212559	0.234953	0.0843647
ENSG00000225528.1	0.0676257	0.175878	0.175594	0.15787	0	0.095447	0.132462	0.0765345	0.071182	0.131853	0.144131	0.103745	0.0871523	0.0808986	0.0298765	0.0271824	0.0974244	0.137155	0.121375	0.155715	0.0368209	0.0333107	0.223787	0.199164	0.0513378	0.133488	0.0946698	0.0768493	0.0250957	0.0918916	0.071264	0.0778431	0.0940752	0.0834092	0.0365367	0.117876	0.0738134	0.0831593	0.0800591	0	0.0328825	0.0451213	0.151193	0.111972	0.133853	0.263349	0.0582301	0.112639	0.0577789
ENSG00000104957.12	4.18898	4.92819	4.74941	4.89054	3.76734	5.41396	5.38706	6.0345	8.89241	4.8235	3.99375	4.95715	5.7914	5.549	4.23811	4.26322	5.70893	5.01747	6.61979	6.28895	5.15155	6.46888	4.67394	4.9916	4.13073	7.66552	4.74223	3.64875	4.29242	4.15553	6.85033	4.4735	6.15686	7.95288	5.16155	5.65782	4.27304	5.99372	6.8779	5.75056	6.37292	24.9353	6.7078	7.75666	8.37382	7.59881	8.36783	7.10772	10.1412
ENSG00000155890.3	0	0	0	0	0	0	0	0	0	0.00742615	0	0	0	0	0	0	0	0	0	0	0	0	0	0	0	0	0	0	0	0	0	0	0	0	0	0	0	0	0	0	0	0	0	0	0	0	0	0	0
ENSG00000224309.6	0	0	0	0	0	0	0	0	0	0	0	0	0	0	0	0	0	0	0	0	0	0	0	0	0	0	0	0	0	0	0	0	0	0	0	0.00494801	0	0	0	0	0	0	0	0	0	0	0	0	0.00291043
ENSG00000177034.13	1.19659	1.4329	1.16335	1.49381	2.4606	1.02613	1.26793	1.63254	1.72147	1.13616	1.02168	0.796502	1.00603	1.75588	1.03219	1.0938	1.14723	1.46244	1.27139	1.96624	1.24218	1.47037	1.14609	1.46791	1.3605	1.92672	1.52157	1.01918	1.25055	1.9661	1.23973	2.03338	0.706117	1.39134	2.17709	0.785743	1.96212	1.89283	1.93616	0.354712	1.15476	3.8807	2.05078	1.96611	1.02826	1.65759	3.0579	1.99351	2.59081
ENSG00000137251.14	12.1161	6.5473	10.7424	12.2756	1.31435	8.38649	7.80206	8.50162	10.2877	9.04689	6.99807	13.3623	10.9302	6.16003	12.1866	8.06819	14.8201	7.11263	6.50312	5.30072	12.3034	10.0364	5.17889	7.85821	14.0422	9.54881	9.24805	12.3131	12.1849	6.6733	7.44799	7.7017	12.1543	7.89043	3.63308	11.2636	8.7063	5.24452	3.33492	1.06606	2.55293	2.04798	1.94779	1.67179	8.77332	0	5.28595	4.02657	10.3312
ENSG00000236156.2	0	0	0	0	0	0	0	0	0	0	0	0	0	0	0	0	0	0	0	0	0	0	0	0	0	0	0	0	0	0	0	0	0	0	0	0	0	0	0	0	0	0	0	0	0	0	0	0	0
ENSG00000268736.1	0	0	0	0	0	0	0	0	0	0	0	0	0	0	0	0	0	0	0	0	0	0	0	0	0	0	0.0336018	0	0	0	0	0	0	0	0	0	0	0	0	0	0	0	0	0	0	0	0	0	0
ENSG00000224011.1	0.182462	0.0790896	0.0888325	0	0.0645436	0.0482863	0	0.123899	0.0720214	0.118585	0	0.0466527	0.17636	0	0.181373	0	0.112655	0.0462575	0.070175	0.140045	0	0.202221	0	0	0.103886	0	0.10947	0.0888635	0.101566	0.0743802	0	0	0.0634564	0	0.14787	0.0795105	0.149368	0.067312	0	0	0	0	0.0874147	0	0	1.06582	0	0.065124	0
ENSG00000223659.1	0	0	0	0	0	0	0	0	0	0	0	0	0	0	0	0	0	0	0	0	0	0	0	0	0	0	0	0	0	0	0	0	0	0	0	0	0	0	0	0	0	0	0	0	0	0	0	0	0
ENSG00000251054.1	0	0	0.0341168	0	0	0	0	0	0.0553208	0	0	0	0	0	0.092877	0	0	0.0355311	0.0539025	0	0.0572325	0	0	0.0412759	0.0797968	0	0.0420428	0.0341287	0	0	0.0553845	0	0	0	0.170372	0	0	0.103407	0.0622198	0	0	0	0	0	0	0	0.18102	0	0
ENSG00000088832.13	67.0404	76.73	82.9868	79.19	47.2303	54.9433	79.0125	76.6977	90.758	101.577	78.7117	109.485	115.462	74.6027	84.743	95.0006	79.8297	76.2038	104.798	93.8989	89.2419	73.2981	93.9182	105.023	82.8076	76.5254	71.5951	77.9989	66.6392	71.5002	82.7123	72.7504	76.8796	84.2036	62.5236	70.3585	84.5838	97.2828	94.2897	36.6006	57.5759	42.9505	69.7158	50.3289	51.4901	54.2995	45.323	95.6395	56.9902
ENSG00000277958.1	0	0.0891861	0	0	0	0	0	0	0	0	0	0	0	0	0	0	0	0	0	0	0	0	0	0	0	0	0	0	0	0	0	0	0	0	0	0	0	0	0	0	0	0	0	0	0	0	0.0664381	0	0
ENSG00000228222.1	1.16171	0.32663	1.00888	0.615693	0.399835	0	1.15313	1.3645	1.14018	0.73461	0.923466	0.706455	0.789039	0.450721	0.915502	1.28728	0.581564	1.2099	0.724534	1.06034	0.461576	0.974339	0.935108	1.07264	0.464791	0.578447	0.71582	1.46798	0.52432	1.07513	0.496303	0.50598	0.917233	0.929417	0.254452	0.492552	0.411246	0.741306	1.33813	0	0.0916013	0	0	0	0	0	0	0	0.0321911
ENSG00000163209.13	0	0	0	0	0.142435	0.0106558	0	0	0	0	0	0	0	0	0	0	0	0	0	0	0.0328858	0	0	0	0	0	0.0120789	0	0	0.0164142	0.286416	0	0	0	0	0	0	0	0	0	0.146842	0	0	0	0.0896611	0	0.0130018	0.186831	0
ENSG00000240375.1	0.0296337	0	0	0	0	0.0156844	0	0	0	0.0385189	0	0	0	0	0.0196379	0.0178671	0	0.0300509	0	0	0	0	0	0.0174548	0	0.0389965	0	0.0288647	0.0164955	0	0.023421	0	0.020612	0	0	0	0.0242589	0	0	0	0.0432276	0	0	0	0	0.247286	0.0574123	0	0
ENSG00000265833.1	0	0	0	0	0	0	0	0	0	0	0	0	0	0	0	0	0	0	0	0	0	0	0	0	0	0	0	0	0	0	0	0	0	0	0	0	0	0	0	0	0	0	0	0	0	0	0	0	0
ENSG00000201296.1	0	0	0	0	0	0	0	0	0	0	0	0	0	0	0	0	0	0	0	0	0	0	0	0	0	0	0	0	0	0	0	0	0	0	0	0	0	0	0	0	0	0	0	0	0	0	0	0	0
ENSG00000257048.1	0	0	0	0	0	0	0	0	0	0	0	0	0	0	0.0373311	0	0	0	0	0	0	0.0416223	0	0	0	0	0	0	0	0	0	0	0	0	0	0	0	0.0415635	0	0	0.0821743	0	0	0	0	0	0	0	0
ENSG00000260316.2	0.0122722	0.0319169	0.00896216	0	0.00434113	0.0194861	0.0090143	0.0125	0.0145322	0.0159518	0.00392336	0.0125512	0.0118618	0.0220213	0.0121989	0	0.0113656	0.0124449	0	0.0235482	0.0250574	0.0317361	0	0.00722852	0.00698728	0.0201869	0.0147257	0.00896529	0.00341562	0.0150082	0.00969932	0	0	0.0181637	0.0198912	0.0106956	0.00502315	0.013582	0	0.0809846	0	0.0245648	0.0235177	0.0304798	0	0	0.0277388	0.052562	0.0377469
ENSG00000154640.13	5.51041	6.10766	5.71467	6.41432	8.74933	10.5608	5.37828	6.21925	9.7034	7.63684	4.56903	5.57781	14.3489	6.68224	6.03612	7.27438	6.99087	6.53206	10.7804	8.25604	5.56907	5.32633	11.605	8.98132	5.14305	6.01801	7.36686	5.53898	4.48196	7.77489	6.03557	10.224	5.21542	11.2655	6.13783	8.24537	10.783	10.9625	15.0912	2.82273	22.885	14.3541	10.1741	20.3102	15.4452	26.7289	6.23977	8.23528	13.4341
ENSG00000163138.17	1.38509	2.34538	1.78656	2.35832	2.11764	1.36337	1.62783	1.77359	2.36867	2.65148	1.5596	1.5049	2.73319	1.86568	1.65935	1.43163	2.1324	2.17073	3.28757	1.83903	1.80998	1.67996	3.77398	2.06822	1.69604	2.03576	2.01167	1.93086	1.92251	2.02974	1.80272	2.93198	1.28622	2.25238	1.78434	4.5715	2.06748	2.12884	2.66406	1.10791	4.10393	2.76529	1.96488	2.75207	2.28581	3.59057	1.19421	1.92097	4.6107
ENSG00000168438.13	3.60813	3.29926	3.33987	3.28038	2.58546	2.84582	3.28284	4.20107	3.99046	3.80207	3.92144	2.60483	3.80108	3.48018	3.32066	2.70939	3.37096	4.38872	4.25971	3.85725	3.09627	4.05925	4.15357	4.0637	4.1531	3.04342	4.06016	3.5644	3.28359	3.07098	3.83696	3.91458	3.33265	3.64325	3.82366	3.82284	3.27923	4.80951	5.5365	2.21091	5.21702	3.99446	4.53013	3.17494	3.78812	5.34185	3.09108	3.78942	3.84939
ENSG00000197557.6	1.75768	1.19544	1.69729	2.63877	1.64199	1.75009	1.77255	1.83976	2.17337	1.63462	2.05521	1.50963	1.85377	1.88194	2.12687	1.92045	1.8197	1.85874	2.16994	1.59876	1.40381	1.85116	1.98838	1.69595	1.95727	1.27471	2.02169	2.01712	1.73788	1.68638	1.51966	2.0456	1.70552	1.39417	1.34969	2.52209	1.97945	2.02051	1.74601	0.555385	0.757861	2.32284	1.03748	0.241185	1.69386	0.0324141	2.54615	0.564961	1.58057
ENSG00000253167.1	0.0741348	0.0856916	0.0721859	0.346131	0.104897	0.130793	0.0726058	0.0671209	0.2341	0.0642419	0.0948022	0.0758205	0.0477704	0.0886853	0.0327522	0.0595976	0.0915443	0.0501189	0.114049	0.151735	0.040365	0.182585	0	0.145556	0.0844188	0.162596	0.088956	0	0	0	0.23437	0	0.0343767	0.07315	0.12016	0	0.040459	0.291723	0.17553	0	0.072095	0.6925	0.426203	0	0.0733684	0	0.351092	0.0352801	0.12668
ENSG00000266985.1	0.0104433	0	0	0	0	0	0	0	0	0	0	0	0	0	0	0	0	0	0	0	0	0	0	0	0	0	0	0	0	0	0.0165077	0	0	0	0	0	0	0	0	0	0	0	0	0	0	0	0	0	0
ENSG00000255671.1	0.0460499	0	0	0	0	0	0	0	0.0727073	0	0	0	0	0.0826322	0	0	0	0.0466981	0	0.282758	0	0	0	0	0	0	0	0	0	0	0	0	0	0	0	0	0	0	0.0817746	0	0	0	0	0	0.136721	0	0	0	0
ENSG00000271631.1	0.0237799	0	0.208392	0.33308	0	0.0503444	0.17467	0.12918	0.413001	0.0309098	0.152046	0.194565	0.0459692	0.213354	0.0315173	0.0860257	0.176185	0.192917	0.109749	0.365036	0.116529	0.351401	0	0.140067	0.18955	0.375517	0.171204	0.0926511	0.158843	0.0775505	0.150355	0.164236	0.132322	0.246372	0.192716	0.0414497	0.272535	0.140362	0.211139	0	0.0693767	0.285595	0.0911406	0.236243	0	0.0793748	1.16713	0.10185	0.29257
ENSG00000281415.1	0	0	0	0	0	0	0	0	0	0	0	0	0	0	0	0	0	0	0	0	0	0	0	0	0	0	0	0	0	0	0	0	0	0	0	0	0	0	0	0	0	0	0	0	0	0	0	0	0
ENSG00000168484.11	0	0.0473347	0	0.0254929	0.0193145	0.00963303	0.0200531	0.0494354	0	0	0	0	0	0	0	0.27434	0	0	0.0349994	0.0279387	0.133782	0	0.090343	0.00536017	0	0.293397	0.0436781	0.00886405	0	0.0667742	0	0.0104751	0	0.101017	0.0294998	0	0.0148993	0	0	0	0.0132747	0	0.00871953	0	0	0	0.0058769	0	0
ENSG00000207497.1	0	0.529484	0	0	0	0.161632	0	0	0	0	0	0	0	0	0	0.184125	0	0.154841	0	0.234391	0	0	0	0	0	0.200934	0.183218	0.148729	0	0	0	0	0	0	0	0	0.249994	0.225318	0	0	0	0	0	0	0	0	0	0	0
ENSG00000198915.10	0.0764339	0.0869686	0.600047	0.0869858	0.135188	0.0530966	0.23159	0.418459	0.24136	0.226645	0.189375	0.158787	0.129286	0.257162	0.196276	0.380196	0.348038	0.343949	0.202101	0.373992	0.144358	0.582389	0.209461	0.129435	0.203992	0.355184	0.404118	0.16286	0.454716	0.303792	0.781548	0.230953	0.282435	0.551498	0.476189	0.174863	0.144695	0.352465	0.35205	0.399309	0.0905907	0.0956217	0.192246	1.63733	0.170198	0.23121	4.22961	0.231886	0.0342849
ENSG00000237875.1	0	0	0	0	0	0	0	0	0.388183	0	0.3144	0	0	0	0	0.296473	0	0.24932	0	0	0	0	0	0	0	0	0	0.239479	0	0	0.38863	0	0.684039	0	0	0	0	0	0	2.16325	0	0	0	0	0	1.64131	0	0	0
ENSG00000082146.11	9.23051	7.08279	8.9007	11.1053	2.65266	19.9919	8.46608	11.8249	13.3588	8.36901	9.70966	11.7925	11.2096	9.25712	9.68393	8.11468	13.912	11.1073	11.0821	6.0098	10.0638	10.8962	5.61161	12.0914	11.7694	8.00174	13.9858	10.8432	11.6261	4.54527	9.53379	8.39503	11.4402	11.748	6.09903	10.6534	9.99939	8.73507	12.3154	0.8661	6.14825	2.88385	5.16173	5.24515	7.08045	5.13757	9.52959	2.46571	10.0785
ENSG00000232518.2	0.013357	0.0231588	0.0130059	0.0374178	0	0.0141391	0.0392446	0	0	0	0	0	0	0.0239679	0	0	0	0	0.0205485	0.0410077	0.0218179	0	0	0	0	0.0175771	0.0160274	0	0.0148702	0	0.0422269	0	0	0	0	0	0	0	0.0711575	0	0.0389685	0	0	0	0	0	0	0.0190695	0
ENSG00000221643.1	0.116046	0.402408	0	0	5.25437	0	0.340957	0.6304	0	0.15084	0.296794	0	0.22433	0.416466	0.153804	0.27987	0.143297	0.117679	0.178525	1.60324	0.189554	0	0.960045	0.273412	0.132144	1.22168	0	0.113034	0.258385	2.4599	0	0.801473	0.161433	0.515269	3.19754	0	0.949978	0.342483	0.206072	0	0	0.464569	0.444766	0	0	0	0	0	0.237957
ENSG00000242795.2	0.0282763	0.0980526	0.0275329	0	0.0400095	0	0.0830791	0	0	0	0	0.0289192	0	0.152217	0.0374767	0.0681945	0	0	0	0	0.0461876	0	0	0.0666208	0.0643974	0.0744201	0.0339293	0.055085	0	0.046107	0.0893925	0	0.0393355	0	0	0	0.0925905	0	0	0	0	0	0.0541869	0.561826	0	0	0.0365215	0	0.0289908
ENSG00000224783.1	0	0	0	0	0	0	0	0	0	0	0	0	0	0	0	0	0	0	0	0	0	0	0	0	0	0	0	0	0	0	0	0	0	0	0	0	0	0	0	0	0	0	0	0	0	0	0	0	0
ENSG00000280026.1	0	0	0	0	0	0	0	0	0	0	0	0	0	0	0	0	0	0	0	0	0	0	0	0	0	0	0	0	0	0	0	0	0	0	0	0	0	0	0	0	0	0	0	0	0	0	0	0	0
ENSG00000211978.2	4.67133	3.83652	6.70309	8.95364	0.139152	0.624612	9.24629	3.07186	4.34765	5.11322	4.08721	1.76015	4.08737	5.20583	3.45408	4.98074	9.4722	9.67363	2.64762	3.17024	3.21278	15.0412	3.57983	1.15852	4.47944	1.87652	4.13017	11.6387	3.83198	0.962152	14.8457	2.71686	4.30944	2.25612	5.10077	1.62848	2.01267	13.2785	2.44492	2.16325	5.16445	0	1.13076	0.977006	0.729953	0.164131	0.381062	1.12322	0.252073
ENSG00000242618.1	0	0.0265581	0	0.04291	0	0	0	0	0	0	0	0	0	0	0	0	0	0	0	0	0	0	0	0	0	0	0	0	0	0	0.0484249	0	0	0	0	0	0	0	0	0	0	0	0	0	0	0	0.0197841	0	0
ENSG00000083838.14	1.34951	1.29763	1.14762	1.14734	1.22574	1.19771	1.4068	1.53662	1.80971	1.13367	0.934452	1.04268	1.5493	1.16848	1.51133	1.18318	1.49541	1.70614	1.72252	1.3524	1.01072	1.66328	0.970185	1.27042	1.21796	1.75649	1.4602	1.07627	1.04643	1.18673	1.49042	1.22101	1.574	1.78368	1.60467	1.01692	1.15298	1.46093	1.72669	1.86664	1.50436	2.78383	1.15754	1.05381	1.61841	0.944178	1.58318	1.17787	1.36548
ENSG00000278175.2	0.378507	0.299181	0.368556	0.436608	0.322916	0.282825	0.359797	0.521604	0.536098	0.441349	0.32743	0.301721	0.742458	0.459455	0.339361	0.4967	0.494887	0.496727	0.762123	0.316149	0.309134	0.559329	0.580226	0.518024	0.316921	0.439496	0.487574	0.292779	0.514341	0.254137	0.448729	0.486953	0.456857	0.568457	0.640562	0.650058	0.373648	0.689961	0.810529	0.0489761	0.227351	0.289687	0.181337	0.110597	0.198314	0.0928984	0.150977	0.238405	0.291054
ENSG00000222312.1	0	0	0	0	0	0	0	0	0	0	0	0	0	0	0	0	0	0	0	0	0	0	0	0	0	0	0	0	0	0	0	0	0	0	0	0	0	0	0	0	0	0	0	0	0	0	0	0	0
ENSG00000255458.4	0.0441287	0.0655815	0.0429685	0.0883002	0.0445999	0.033366	0.0555666	0.0684919	0.0696739	0.0245828	0.0161231	0.0193423	0.0487462	0.0791847	0.0417765	0.0456112	0.0700606	0.0191785	0.106681	0.125803	0.0411895	0.0838414	0.0521537	0.00742644	0.0502501	0.132734	0.0529509	0.049124	0.0280731	0.0616764	0.0398595	0.0725656	0.0613881	0.0746442	0.112397	0.0329652	0.0516068	0.065118	0.0783629	0.166404	0.0919595	0.0504746	0.0362423	0.0626286	0.0374335	0.231467	0.0895658	0.135003	0.226219
ENSG00000271025.1	0	0.10612	0	0	0	0	0	0	0	0.0795569	0	0	0	0.109828	0	0	0	0	0	0	0	0	0	0.0721022	0	0	0	0	0	0	0	0	0	0.0905888	0	0	0	0	0	0	0	0	0	0	0	0.408596	0.158106	0	0.125505
ENSG00000280244.1	0	0	0	0	0	0.0666162	0	0	0	0	0	0	0	0	0.041704	0	0	0	0	0	0	0	0	0	0	0	0	0	0	0	0	0	0	0	0	0	0	0	0	0	0	0	0	0	0.0934213	0	0	0	0.0322609
ENSG00000067842.16	0.0539103	0.0267061	0.0356203	0.0377555	0.354159	0.0856002	0.0537412	0.0496814	0.0121597	0.0450478	0.0123106	0.0196915	0.0111659	0.131286	0.0382775	0.0417911	0.00475502	0.0195247	0.0296199	0.0827556	0.0377397	0.0312968	0.0955712	0.0703126	0.0263094	0.0988136	0.0462058	0.0318819	0.0428698	0.131859	0.0152171	0.27925	0.0107136	0.0227975	0.218449	0.00671206	0.170224	0.0255703	0.0239332	0	0	0	0.00737931	0	0.0171491	0	0	0	0.00394805
ENSG00000171564.10	0	0.018575	0.00521579	0	0	0.045362	0	0	0	0.0139254	0	0.942288	0.010355	0	0	0	0.0132291	0	0	0	0	0	0.141809	0.00631028	0	0	0	0	0	0	0	0.0123319	0	0	0.0260465	0	0	0	0	4.47748	0.968917	0	0.0102651	1.91577	0.524822	0	0.117616	0	0.010984
ENSG00000270141.3	0.0268128	0	0	0	0	0.0283827	0.0393897	0	0	0.0697042	0.0342877	0	0	0	0.0710741	0	0	0	0	0.0411593	0.0437971	0.0792438	0	0	0	0.0352842	0	0	0	0	0.042383	0	0.0745994	0.0396849	0	0.0467363	0.0877984	0	0.0476137	0	0	0	0.154147	0	0	0	0.0346313	0	0
ENSG00000241404.5	0.304393	0.393426	0.215557	0.589149	0.610813	0.158179	0.252043	0.699008	0.900034	0.165458	0.120314	0.254712	0.395851	0.754755	0.315413	0.133475	0.471553	0.398475	0.30651	0.798594	0.379686	0.564306	0.256403	0.293388	0.258388	0.830263	0.511347	0.226414	0.301909	0.397073	0.507399	0.305789	0.384951	0.974771	0.70866	0.173643	0.444	0.56351	0.678127	0.34087	0.355221	2.3707	0.562109	0.439858	0.361495	0.2771	1.47969	0.434574	1.31076
ENSG00000222231.1	0	0	0	0	0	0	0	0	0	0	0	0	0	0	0	0	0	0	0	0	0	0	0	0	0	0	0	0	0	0	0	0	0	0	0	0	0	0	0	0	0	0	0	0	0	0	0	0	0
ENSG00000163521.14	1.9392	1.69587	1.38718	2.14437	2.62352	2.52991	1.62432	1.50161	2.25604	2.43219	0.86467	0.930756	1.64417	2.2435	1.01454	1.9179	1.58589	0.931497	2.16549	1.69076	1.17395	2.28117	1.42135	1.17729	1.38013	1.79639	1.41348	1.4995	1.53395	1.83759	1.95614	2.27135	0.798647	1.54208	2.68819	1.44545	1.67103	1.74455	3.05091	0.972859	1.82381	2.31535	1.09203	3.4221	1.33835	1.05042	2.52663	3.09033	2.0318
ENSG00000233571.1	0.0275774	0	0	0	0	0	0	0	0	0	0	0	0	0	0.0365504	0	0	0	0	0	0	0	0	0	0	0	0	0	0.0307016	0	0	0	0	0	0	0.0480691	0	0	0	0	0	0	0	0	0.655015	0	0.712378	0	0
ENSG00000237970.1	0	0	0	0	0	0	0	0	0.0157192	0.012941	0	0.0101823	0	0	0	0	0	0	0	0	0	0	0	0	0.011337	0	0	0	0	0	0.0157373	0	0	0	0	0.0173537	0	0	0	0	0	0	0	0	0	0	0.012859	0	0
ENSG00000227836.1	0	0	0	0	0.0566985	0.0848345	0	0.0544199	0.126535	0	0.102484	0.0409822	0	0	0	0	0	0.0406351	0	0	0	0.059214	0.0663014	0	0	0	0	0.0390312	0	0.0653395	0.0633403	0	0.0557435	0.0593081	0	0	0.131212	0	0	0	0.116905	0	0	0	0	0.133753	0	0	0.0410837
ENSG00000186440.1	0	0	0	0	0	0	0	0	0	0	0	0	0	0	0	0	0	0	0	0	0	0	0	0	0	0	0	0	0	0	0	0	0	0	0	0	0	0	0	0	0	0	0	0	0	0	0	0	0
ENSG00000229667.2	0	0	0.0383814	0	0	0	0	0	0	0	0	0	0	0	0	0	0	0	0	0	0	0	0	0	0	0	0	0	0	0	0	0	0	0	0	0	0	0	0	0	0	0	0	0	0	0	0	0	0
ENSG00000183506.15	0.419218	0.656187	0.436544	0.467577	0.42291	0.677972	0.581643	0.738025	0.858012	0.300207	0.116649	0.148872	0.465228	0.390054	0.437295	0.388501	0.627908	0.464482	0.459808	0.664381	0.42164	0.688321	0.321128	0.747639	0.41107	0.572101	0.444808	0.315707	0.509925	0.604456	0.57369	0.303832	0.656078	1.10306	0.487592	0.416106	0.352715	0.67303	0.720315	0.461072	0.464306	0.932369	0.550453	0.829095	0.299638	0.459957	0.834752	0.73705	0.354197
ENSG00000228149.1	0.167696	0.103842	0.0933071	0.0671111	0.0677948	0.0887575	0.0703875	0.341618	0.189123	0.155698	0.0765881	0.0490027	0.0231554	0.0644817	0.0476273	0.115553	0.103539	0.15791	0.0368549	0.0919371	0.0195658	0.194707	0.0396385	0.0282217	0.0545597	0.0472884	0.129357	0.151677	0.106683	0.0585951	0.151473	0.0275761	0.149969	0.0531863	0.0776593	0	0.0196114	0.0707026	0.0212709	0.105394	0.174731	0.095906	0.0918179	0	0.0355634	0.439806	0.0154711	0.0684044	0.024562
ENSG00000251571.1	0.00727468	0	0.00708343	0	0	0.00770062	0	0	0.0114859	0	0	0	0	0	0	0	0	0.00737708	0	0	0	0.01075	0	0.00856982	0	0	0.00872905	0	0	0	0	0	0.0101199	0.0107671	0	0	0	0	0	0.192024	0.0212236	0	0	0.072271	0.0215984	0.145693	0.00939596	0	0.00745852
ENSG00000201364.1	0	0	0	0	0	0	0	0	0	0	0	0	0	0	0	0	0	0	0	0	0	0	0	0	0	0	0	0	0	0	0	0	0	0	0	0	0	0	0	0	0	0	0	0	0	0	0	0	0
ENSG00000200834.1	0	0	0	0	0	0	0.421976	0.195049	0	0	0	0.146887	0	0	0	0.173187	0	0	0	0.220467	0	0	0	0	0	0	0.172334	0.139894	0.159892	0	0	0	0	0.21257	0	0	0.235143	0	0	0	0	0	0	0	0.426408	0	0.556501	0.205044	0
ENSG00000140319.9	90.9194	84.182	92.0303	90.8579	90.5244	89.7791	87.9175	77.6111	78.1894	109.491	98.3362	89.7015	120.99	93.0687	78.2733	86.6656	83.4323	82.8156	139.203	76.9523	80.915	83.4433	150.734	89.123	93.5879	84.4952	79.1635	90.9348	90.4267	76.5505	98.6698	116.057	99.9194	79.3034	92.2161	174.065	106.215	97.044	107.969	51.9439	63.638	62.4735	72.219	91.5681	77.7358	72.7366	118.674	85.7402	65.3342
ENSG00000232193.1	0	0	0	0	0	0	0	0	0	0	0	0	0	0	0	0	0	0	0	0	0	0	0	0	0	0	0	0	0	0	0	0.0425953	0	0	0	0	0	0	0	0	0	0	0	0	0	0	0	0	0
ENSG00000256378.1	0	0	0	0	0	0	0	0	0	0	0	0	0	0	0	0	0	0	0	0	0	0	0	0	0	0	0	0	0	0	0	0	0	0	0	0	0	0	0	0	0	0	0	0	0	0	0	0	0
ENSG00000183298.5	0.626383	0.342961	1.50874	0.646478	3.35861	1.62275	1.33186	3.76091	4.26825	0.942749	1.87604	0.202303	4.93908	1.74513	2.05364	1.78894	1.77086	0.9528	0.507174	1.34109	0.780833	2.09483	15.4916	1.82533	2.3463	3.18869	1.58234	1.81433	0.293619	3.14476	1.87602	2.99793	2.40774	3.07405	2.27098	0.545912	0.458796	3.16213	3.1906	0.580144	0.480907	0.527919	0.758124	0.655038	0.29364	0.880339	2.04388	4.16542	2.97446
ENSG00000281527.1	0.604405	0.261984	0.588515	0.846578	2.77941	0.95969	0.443954	1.43646	0.954283	0.196406	0.386451	0.772685	1.16838	1.08455	0.400532	0.546622	0.37317	0.306456	0.697364	3.01535	1.23408	1.11643	2.00009	0.178002	0.688248	0.994207	0.906548	0.44154	0.841097	1.23192	1.43307	1.73931	0.840797	0.670923	0.97964	1.31689	1.73173	2.00674	1.07329	0	0	3.62944	0.868684	0	0.897234	0.504361	1.36613	1.07862	2.16888
ENSG00000254534.1	0	0	0	0	0	0.00923334	0	0.0118461	0	0.0340138	0.0111543	0	0	0	0	0.0105183	0	0	0	0	0	0	0	0	0	0	0	0.00849627	0	0	0	0	0.0121342	0	0	0	0	0	0	0	0	0	0	0	0	0	0	0.0124531	0
ENSG00000199072.2	0	0	0.128403	0	0	0	0	0	0	0.171409	0	0.269737	0.25492	0	0	0.159017	0	0	0	0	0	0	0.218192	0	0	0	0	0.128448	0	0.215026	0	0	0	0.195178	0	0	0	0.389186	0	0	0	0	0	0	0.39152	0	0.170323	0	0
ENSG00000243794.1	0.13815	0	0.0672589	0	0	0	0.101475	0	0	0.269357	0.0883316	0.0706455	0	0	0	0	0.085296	0.0700471	0	0	0	0.204147	0.114291	0	0	0	0.0828844	0	0.0769003	0.225266	0.218373	0	0.384364	0	0	0	0	0.10193	0	0	0	0	0	0	0	0	0.0892169	0	0.0708204
ENSG00000234233.1	0.0231721	0.080353	0.0225629	0	0	0.0245288	0	0.0944089	0.0365859	0	0.029632	0.0473979	0.134383	0	0.0307117	0.0279423	0	0.0234982	0	0	0.0378502	0.0342419	0.115021	0	0.052773	0.0609865	0	0	0.0773917	0.0755684	0	0.160038	0	0.0342964	0.0375581	0.0403903	0	0	0.205743	0	0	0	0	0	0.137595	0	0	0	0.0237576
ENSG00000159086.13	2.52824	3.31643	3.39008	3.99483	2.09176	3.54495	2.36677	3.54829	4.67138	2.43138	2.07564	2.15786	2.73725	2.89092	1.92202	2.12221	4.08811	3.79373	4.04107	3.73281	3.13098	3.25752	2.6324	2.66796	2.95912	3.8114	2.91785	4.00056	2.17874	2.87626	2.62929	2.47265	2.0929	3.16149	3.65124	3.20436	2.72335	3.2648	3.78242	1.73432	5.36332	7.58499	6.42142	3.11715	4.23984	5.08221	6.82969	2.76815	4.41714
ENSG00000272864.1	0.231065	0.133542	0.174992	0.359608	0.326945	0.706604	0.0377165	0.174336	0.283752	0.0333717	0.0984936	0.0787729	0.198522	0.506762	0.204165	0.247673	0.126812	0.182246	0.592451	0.157644	0.0838734	0.303511	0.212399	0.211713	0.175412	0.168927	0.215646	0.125038	0.11433	0.502363	0.121748	0.591057	0.142861	0.151997	0.249678	0.268506	0.75662	0.227312	0.638276	0.225897	0.224707	0	0.0491998	0	0.304901	0.342787	0.497404	0.256577	0.789679
ENSG00000099899.13	4.05194	4.09973	4.61546	3.60933	2.83298	3.20429	5.32879	5.43328	6.91765	6.15654	3.72116	2.78143	5.42003	5.41206	3.92952	3.98125	5.41026	4.68801	5.44517	5.22545	3.52753	6.31218	4.33025	4.82506	4.16804	5.809	4.12414	4.00383	3.90789	4.36889	6.59583	3.72457	5.55015	6.24096	5.83186	6.89689	3.58969	5.71994	6.14238	21.5135	10.4651	6.53538	11.0967	6.29088	7.48759	10.8737	6.61394	10.4409	4.40577
ENSG00000223485.1	0	0.0477239	0.0402022	0	0.0389466	0.0145684	0.0404361	0.0747628	0.0217294	0.0715559	0	0.0140755	0.0798138	0	0	0.0331914	0.0169945	0	0.0423447	0.0633791	0.0224803	0	0.0910858	0.0162127	0.0156717	0	0	0.0134054	0.0153217	0.0448822	0	0.0633676	0	0	0.111534	0.0479779	0	0	0.0244393	0.121093	0.120455	0.330575	0.369232	0.546901	0.53119	0	0.0177757	0.707343	0.084662
ENSG00000274008.1	0.0485141	0.252346	0	0.271811	0	0.0513547	0.0712702	0.461204	0.306392	0.12612	0.0620389	0.0992345	0	0.957593	0	0.0585013	0.119814	0.147591	0.373171	0.297889	0.15849	0.286762	0.321085	0.171454	0.165732	0.510736	0.116426	0.0945103	0.10802	0.0791067	0.153372	0.111688	0.337444	0.359022	0.2359	0.169126	0.158859	0	0.172301	0	0	0	0.836725	0	0.288075	0.485806	0	0.138525	0
ENSG00000243230.1	0.135567	0.0470103	0.0264007	0.0759547	0.191821	0.057402	0.0398314	0.184112	0.171236	0.035243	0.0346722	0.11092	0.104827	0.243263	0.0359356	0.0326951	0	0.0549903	0.0417115	0	0.0442883	0.160265	0.134586	0.0319406	0.0617493	0.0356799	0.130136	0.0528198	0.0301852	0.044211	0.0428583	0.06242	0.037718	0.04013	0.0439464	0.0472604	0.0443915	0.0800195	0.144443	0	0.0791024	0.217088	0.0519586	0	0	0.0905021	0.0350197	0.0774185	0.083396
ENSG00000231258.2	0	0	0	0	0.0100711	0.00753437	0	0	0	0	0	0	0	0	0.0188671	0	0.0175782	0.0216534	0.0218995	0.021852	0.0116262	0.0105179	0.0117768	0.0083848	0	0	0.00854059	0.0138658	0	0	0	0	0	0.0105346	0.0115365	0	0.0233066	0.0210061	0	0	0	0	0	0	0	0	0.0091931	0	0
ENSG00000178789.7	0.597294	0.21267	0.249254	0.268913	0.316928	0.316133	0.626759	0.217279	0.892536	0.741722	0.354625	0.14181	0.525773	1.05265	0.261524	0.37942	0.665121	0.411012	0.508665	0.25378	0.2352	0.740784	0.750035	0.402076	0.242911	0.105269	0.45434	0.410373	0.213738	0.252182	0.446782	0.859422	0.504478	0.44202	0.319823	0.687883	0.384182	0.409217	0.312517	0.0938468	0.217822	0.170797	0.316814	0.211924	0.411672	0.356019	0.144649	0.456826	0.103887
ENSG00000236775.1	0	0	0	0	0	0	0	0	0	0	0	0	0	0	0	0	0	0	0	0	0	0	0	0	0	0	0	0	0	0	0	0	0	0	0	0	0	0	0	0	0	0	0	0	0	0	0	0	0
ENSG00000235499.1	1.3018	1.54772	1.08649	0.833554	0.263139	0.708694	1.09281	2.72769	1.58558	1.06361	1.04639	0.722758	0.359503	0.600672	1.18311	1.03157	1.10229	1.50871	0.514976	1.31319	1.57962	0.934366	0.800037	1.3583	1.1859	1.32153	1.65131	1.34047	0.703934	1.57686	0.999477	0.513765	0.672638	3.24796	1.266	1.03731	0.243584	2.41495	0.660487	1.30904	0.651074	3.1269	2.35213	1.47803	0.773001	0.744902	1.63336	1.16823	0.610145
ENSG00000227278.1	0	0.0582187	0	0	0.0475113	0	0	0	0	0	0	0	0	0.0602526	0	0	0	0.0340507	0	0.103089	0	0.0496191	0	0	0	0	0	0	0	0	0	0	0	0	0	0	0	0	0	0	0	0.134424	0	0	0	0.22416	0.0433693	0	0
ENSG00000231508.1	0.0413268	0	0	0	0	0.0874931	0	0.112251	0	0	0	0	0	0	0	0	0.0510318	0	0	0	0	0	0	0	0	0	0	0	0	0	0	0	0.0574904	0.0611668	0	0	0.0676623	0	0	0	0.120569	0	0	0	0	0.137945	0	0	0
ENSG00000131797.11	1.03529	1.69418	1.1961	1.47944	0.803219	1.54166	1.48331	1.65246	3.21043	1.01306	0.797322	0.947001	1.57858	1.47366	0.866459	0.751857	1.55133	1.53115	1.21331	1.88566	1.62649	2.20027	1.08554	1.25798	1.0226	2.27167	1.40418	0.910982	1.01013	1.32016	2.00423	1.03907	1.34959	2.27264	1.32357	1.58559	1.06654	2.40658	1.76409	5.03567	1.98872	4.05147	3.62911	2.81976	2.20344	1.48323	4.15878	1.62753	2.86473
ENSG00000106348.15	7.90249	8.8322	7.52117	5.14882	9.75239	3.01063	9.51434	13.4167	8.4619	13.1243	7.10174	4.85336	8.87488	10.6476	7.06651	8.74117	8.27129	7.08983	10.1219	10.9451	4.94978	10.6299	8.86114	9.46339	7.17191	11.129	8.12299	7.60096	8.10099	8.96511	9.86168	9.44754	6.70617	9.26321	16.6801	8.04376	7.82137	9.69138	10.6778	34.8878	34.0338	33.333	41.0288	52.5354	17.2292	33.0283	83.3174	15.6254	26.7677
ENSG00000202242.1	0	0	0	0	0	0	0	0	0	0	0	0	0	0	0	0	0	0	0	0	0	0	0	0.16431	0	0	0	0	0	0	0	0	0	0	0	0	0	0	0	0	0	0	0	0	0	0	0	0	0
ENSG00000229306.1	0	0	0	0	0	0	0	0.0609907	0	0	0	0	0	0	0	0	0	0	0	0	0	0	0	0	0	0	0	0.0874879	0	0	0	0	0	0	0	0	0	0	0	0	0	0	0	0	0	0	0	0	0
ENSG00000253508.1	3.18291	3.30213	3.45488	1.09629	3.21162	0	3.25779	4.67698	5.39616	2.5773	2.26866	5.01634	4.53905	3.55794	4.42602	6.63811	5.09015	3.9685	2.76939	2.84347	2.89786	5.93716	0.69068	5.47069	3.38677	4.63486	4.44535	6.48016	0.522811	4.21158	3.38164	1.68175	4.68185	4.98124	1.52232	0	2.8619	3.65736	3.01139	1.83643	0.0761147	5.95333	1.74987	3.88781	1.54918	4.52836	5.05455	0.633202	3.71807
ENSG00000145912.7	20.9709	25.8833	22.4306	15.8506	17.9423	12.3247	21.3804	22.4397	22.0534	35.3375	27.3576	12.5857	36.4536	22.0472	20.1295	21.0134	23.7247	23.0487	37.375	23.1667	13.7929	23.0538	53.4541	29.4234	23.3767	24.2465	20.7831	23.7391	22.737	17.2776	23.0355	27.5119	27.9835	22.9767	21.7052	54.3697	21.2487	26.551	27.9425	30.3442	49.1022	27.3434	49.6496	32.1619	40.7855	51.8496	35.2501	40.98	52.5652
ENSG00000110060.7	3.96923	5.80588	4.00542	4.38704	3.70673	3.95717	3.42441	3.9988	3.55506	5.20623	3.91296	3.16639	5.41294	3.5612	3.92163	3.28952	4.17059	4.04705	5.60667	4.4202	3.53645	4.15912	7.22422	3.85973	4.65132	3.82725	4.00072	3.7186	3.9047	3.49498	4.50598	5.36641	4.28681	3.79188	5.34562	6.72991	4.33634	4.37689	5.01083	3.36541	8.33763	10.6319	8.04894	5.87905	5.99941	2.96293	5.79777	3.91522	8.41283
ENSG00000144791.8	3.05498	3.31027	3.27559	3.09746	2.05848	1.71689	3.45719	4.6106	4.21081	2.90271	2.85424	2.24763	3.30574	3.37456	3.37846	2.77568	4.1201	4.09737	3.41259	4.57186	2.70914	4.31483	2.04918	3.30357	3.52178	3.09987	4.1849	3.64019	3.20611	2.86679	3.8357	2.30835	2.71645	3.80837	3.21326	2.7074	2.52805	4.14659	4.87415	3.90761	3.17908	4.77014	5.17001	3.80938	3.26241	2.96862	3.26575	3.88598	5.07909
ENSG00000265777.2	0.0521788	0	0	0	0	0	0	0	0	0	0	0	0	0	0	0	0.0644323	0	0	0	0	0	0	0.0614684	0	0	0	0	0	0	0	0	0	0	0.0845732	0	0	0	0.0926583	0	0	0.208889	0	0	0	0	0	0.148989	0
ENSG00000207989.2	0	0	0	0	0	0	0	0	0	0	0	0	0	0	0	0	0	0	0	0	0	0	0	0	0	0	0	0	0	0	0	0	0	0	0	0	0	0	0	0	0	0	0	0	0	0	0	0	0
ENSG00000281333.1	0.647314	1.07132	1.28924	1.15396	0.333061	0.249169	0.778045	1.35862	1.62596	0.382454	0.489138	0.451386	2.04764	0.422379	1.91085	1.02893	1.45332	1.61123	1.6748	0.903334	0.913166	1.30439	0.827625	0.485264	1.10566	0.929271	1.37692	1.00309	0.884432	0.719662	0.837171	0.812853	1.02328	1.08872	0.858427	1.94889	0.674427	0.781529	1.30624	1.03555	0	0.353374	0.394696	0.584618	0.524145	0.0982122	0.570047	0.798133	1.17651
ENSG00000164068.14	4.97528	4.55933	4.61532	3.62878	4.24643	6.71809	5.10601	5.38593	5.30959	4.25994	4.21085	4.21912	3.78621	4.78143	4.7458	5.2607	5.14693	5.19718	4.25487	4.67557	4.20003	5.29994	2.56488	4.93079	4.48496	4.98335	5.16244	4.42938	4.56453	4.2593	4.77461	3.79709	4.77016	6.46562	4.68462	3.09189	3.64935	5.22932	4.33807	8.28288	5.05023	8.77529	5.32625	5.5456	3.38394	4.16148	4.42137	6.00346	4.4908
ENSG00000280863.1	0	0	0	0	0	0	0	0	0	0	0	0	0	0	0	0	0	0	0	0	0	0	0	0	0	0	0.497306	0	0	0	0	0	0.288273	0	0.335876	0	0	0	0	0	0	0	0	0	0	0	0	0	0
ENSG00000132958.16	0.0190281	0.0109972	0.0123519	0.0710726	0.0179492	0.0201422	0.046589	0.0172278	0.0600861	0.0412221	0.0162218	0	0.0245223	0.0113813	0	0.0229452	0.0391608	0.0128639	0.0585456	0.0778913	0.0207208	0.0843547	0.0419783	0.0149438	0.0361127	0.0417332	0	0.0432466	0.0494287	0	0.120311	0.0292039	0.0617639	0.0375506	0.0308413	0.0773897	0.0311536	0.0655166	0.0225265	0	0.037009	0.0253918	0.0486189	0	0	0	0.040961	0.063387	0.0195089
ENSG00000280082.1	0	0	0	0	0	0	0	0	0	0	0	0	0	0	0	0	0	0	0	0	0	0	0	0	0	0	0	0	0	0	0	0	0	0	0	0	0	0	0	0	0	0	0	0	0	0	0	0	0
ENSG00000132570.13	1.26629	1.43096	1.16997	1.53	0.70124	1.28476	1.21244	1.68951	1.53303	0.949191	1.01918	1.00131	1.27478	1.04901	1.30833	1.09523	1.29139	1.38668	1.29145	1.25449	1.02099	1.3272	0.913723	1.26297	1.17706	1.4614	1.41265	1.3221	1.17554	0.992822	1.20545	0.973294	1.33383	1.50595	1.10163	1.35748	1.09954	1.39398	1.46917	0.925512	1.00326	1.57102	1.19782	1.36653	1.32126	0.972289	3.34423	1.53639	2.38712
ENSG00000112877.7	0.729648	0.983193	0.872637	0.955351	0.555484	0.360999	1.18258	1.00169	0.732539	0.902029	1.00405	0.336619	0.551933	0.661758	0.646457	0.540346	0.621882	0.864578	0.658854	0.937437	1.12706	1.10752	0.590514	0.780135	0.64121	0.803628	0.675673	0.745476	1.35974	0.620743	0.727115	0.538624	0.562677	0.839296	0.790568	0.926217	0.6038	1.04159	0.711225	3.10531	2.53363	4.31802	3.40444	3.86075	1.6836	2.36931	3.32405	6.61253	2.40689
ENSG00000261651.1	0	0	0	0	0	0	0	0	0	0	0	0	0	0	0	0	0	0	0	0	0	0	0.063495	0	0	0	0	0	0	0	0	0	0	0	0	0	0	0	0	0	0	0	0	0	0	0	0	0.109574	0
ENSG00000175505.10	1.2339	3.27275	1.92377	1.93406	1.81866	1.10401	1.1653	1.85529	1.61189	3.57051	0.864084	2.24599	2.03033	1.25203	1.01238	1.11594	1.81389	1.06507	1.62706	1.73628	1.07974	1.4218	1.55552	1.09019	0.827988	1.46911	1.26908	0.930029	1.0548	2.09583	1.86916	1.58942	1.08303	1.86975	1.869	1.62588	2.29678	2.18929	1.64336	2.32645	3.74985	3.41076	3.47649	5.3995	4.66652	3.89801	1.92573	6.64799	4.57088
ENSG00000274674.1	0	0	0	0	0	0	0	0	0	0	0	0	0	0	0	0	0	0	0	0	0	0	0	0	0	0	0	0	0	0	0	0	0	0	0	0	0	0	0	0	0	0	0	0	0	0	0	0	0
ENSG00000229281.1	0	0	0	0	0	0	0	0	0	0	0	0	0	0	0	0	0	0	0	0	0	0	0	0	0	0	0	0	0	0	0	0	0	0	0	0	0	0	0	0	0	0	0	0	0.0794598	0	0	0	0
ENSG00000176239.7	0	0	0	0	0	0	0	0	0	0	0	0	0	0	0	0	0	0	0	0	0	0	0	0	0	0	0	0	0	0	0	0	0	0	0	0	0	0	0	0.271846	0	0	0	0	0	0	0	0	0
ENSG00000232912.4	0.289288	0.250788	0.321923	0.231543	0.292377	0.459339	0.0910675	0.224501	0.554626	0.0805769	0.158544	0.253599	0.399448	0.407864	0.164321	0.323924	0.382739	0.167634	0.47683	0.570953	0.27002	0.366418	0.512844	0.21908	0.141179	0.435072	0.272739	0.301908	0.230044	0.505404	0.522602	0.190283	0.229962	0.27525	0.736823	0.14407	0.372143	0.426884	0.440325	0	0.120569	0.0827223	0.356383	0.410565	0.184048	0.27589	0.266888	0.147503	0.275413
ENSG00000261188.1	0.449734	0.717878	0.417058	0.559941	0.818166	0.574303	0.47192	0.736811	1.02567	0.723764	0.36515	0.386951	0.910788	0.6661	0.425762	0.800564	0.458382	0.615325	1.12017	0.515038	0.443101	0.748975	0.897679	0.521393	0.707215	0.685768	0.668133	0.570178	0.429158	0.884656	0.778599	0.838154	0.685217	0.792429	0.84465	0.895901	0.888267	1.05341	0.747924	0.251243	1.14547	1.88617	1.026	2.34034	0.593446	1.525	2.35116	0.662458	0.98807
ENSG00000265386.2	0.0490058	0	0.0477175	0	0	0	0	0.066554	0.0773743	0	0	0	0	0.0879362	0.0649511	0	0	0	0.0753907	0	0	0.0724171	0	0	0.0558039	0.128978	0	0	0	0	0	0	0	0.0725322	0	0	0	0	0	0	0	0	0.281735	0.486852	0.145497	0	0.126592	0	0.100488
ENSG00000188086.11	0	0.0233668	0	0.0125846	0.0444949	0.00475536	0.0065995	0.00610096	0	0.00583927	0	0	0.0347367	0.00806105	0	0	0	0.00455556	0	0.013792	0.00733795	0.0132768	0.00743299	0.0317527	0	0.0236467	0.00539044	0.0087515	0.0100025	0.0146503	0.014202	0.0206842	0.00624935	0.0598408	0.0291252	0	0.0367753	0	0.0239322	0	0.0262123	0.0539527	0	0	0	0	0.0116046	0	0.0138175
ENSG00000221579.1	0	0	0	0	0	0.180648	0	0.231765	0	0	0	0	0	0	0	0	0	0	0	0	0	0	0	0	0	0	0	0	0	0	0.269755	0	0	0	0	0	0	0	0	0	0	0	0	0	0	0	0	0	0
ENSG00000228301.1	0	0	0	0	0	0	0	0	0	0	0	0	0	0	0	0.0234476	0	0	0	0	0	0	0	0	0	0	0	0	0	0	0	0	0	0	0	0	0	0	0	0	0	0	0	0	0	0	0	0	0
ENSG00000267938.1	0.0868606	0.376504	0.0845771	0.243328	0.184355	0.183893	0.127604	0.117964	0.274285	0.112904	0.0555378	0.0888357	0.167912	0.0779315	0.115123	0.0523709	0.321775	0.176166	0.0668133	0.133336	0.141882	0.256712	0.143719	0.0511624	0.247275	0.28576	0	0.0423033	0.290103	0.141634	0	0	0.120833	0.25712	0.140787	0.0757016	0.142212	0.192262	0.231368	0	0.126706	0.695462	0.332909	0.431462	0.128944	0.434898	0.112189	0.43403	0.40075
ENSG00000254199.1	0	0	0	0	0	0	0	0	0	0	0	0	0	0	0	0	0	0	0	0	0	0	0	0	0	0	0	0	0	0	0	0	0	0	0	0	0	0	0	0	0	0	0	0	0	0	0	0	0
ENSG00000235608.1	0	0	0	0	0.0166059	0	0	0	0	0	0	0	0	0	0	0	0	0	0	0	0	0	0	0	0	0	0.0140823	0	0	0	0	0	0	0	0	0	0	0	0	0	0	0	0	0	0	0	0	0	0
ENSG00000237596.5	0.00660853	0.00381936	0	0.0123419	0.00311691	0	0.00323611	0.0179499	0.0104341	0.00286332	0.00281695	0	0	0	0	0	0.00544029	0	0.00677772	0.006763	0.00359821	0.0032552	0.00728963	0.00519005	0	0	0.00792971	0.00214568	0.0049048	0.00718387	0	0.00507133	0	0.00326037	0	0	0	0.0130024	0.0195588	0	0	0	0.00422139	0	0.0065402	0.00735287	0.00569037	0	0.00225851
ENSG00000277391.1	0	0	0.185847	0	0	0	0	0	0	0	0	0	0	0.342489	0	0	0	0	0.293627	0	0	0	0	0	0	0.251168	0	0	0	0	0	0	0	0.282494	0	0	0	0	0.338934	0	0	0	0	0	0	0	0	0	0
ENSG00000249745.1	0	0	0	0.0736155	0	0	0	0	0	0	0.0336044	0	0	0	0	0	0.0324496	0.0266484	0	0	0	0	0	0.0309569	0	0	0	0	0.0292556	0	0	0	0	0	0	0	0	0	0	0	0.0766663	0	0.100717	0	0	0	0.0339412	0.0375171	0
ENSG00000275853.1	0.0477162	0.0827319	0	0	0	0	0	0	0	0	0.0610185	0	0	0	0	0.0575391	0	0	0	0	0	0	0	0	0	0	0	0	0	0	0	0	0	0	0	0	0	0	0	0	0	0	0	0	0	0	0	0	0
ENSG00000239792.2	0	0	0	0	0.0369817	0	0	0	0	0	0	0	0	0	0	0	0	0	0	0	0	0.0386225	0	0	0	0	0	0	0	0	0	0	0	0	0	0	0	0	0	0	0	0	0	0	0	0	0	0	0
ENSG00000183715.12	0.00382585	0.0497504	0.0149011	0.0160764	0.0676674	0.0161994	0.0252919	0.0259792	0.00906085	0.00994593	0	0.0195642	0.0443749	0.0480559	0.0380302	0.0161471	0.0118107	0.0174587	0.0382571	0.0205552	0.0187479	0.0424017	0.0316512	0.0180279	0.00653486	0.0528635	0.0229536	0.0186328	0.0319446	0.0592648	0.00604752	0.039635	0.0106444	0.0113251	0.0496085	0.00333434	0.0563748	0.0366963	0.0135878	0	0.00558088	0.0306322	0.0293265	0.0190041	0.0681533	0	0.00247073	0.234869	0.0490317
ENSG00000274964.1	0.160343	0.259474	0.228988	0.0898358	0.363004	0.0565772	0.0785181	0.232277	0.219408	0.389049	0.218713	0.0874609	0.144649	0.0959069	0.042503	0.180462	0.158398	0.0867201	0.197338	0.1805	0.122225	0.142166	0.300677	0.125927	0.206931	0.253204	0.141093	0.156182	0.166608	0.209163	0.0675879	0.196874	0.0594816	0.142392	0.25989	0.0745301	0.24502	0.473218	0.208805	0	0.873216	0.855874	0.368726	1.38055	0.412582	0.463848	1.51873	0.656231	1.06309
ENSG00000234636.2	0.660816	1.17369	0.549281	0.451508	0.456108	0.835997	0.805037	0.985	0.636189	0.35615	0.638932	0.758262	0.903551	0.636268	0.405872	0.719111	0.99512	0.866249	0.619879	0.395861	0.500212	0.833601	0.880041	0.702516	0.605658	0.445405	0.792927	0.973351	0.78951	0.735868	0.636922	0.85342	1.0538	0.644086	0.41798	1.40469	0.448601	0.761074	0.744149	2.12719	0.47022	0.709758	0.370638	0.320241	0.765639	0.806977	0.749422	0.621283	0.132198
ENSG00000277066.1	0	0	0	0	0	0	0	0	0	0	0	0	0	0	0	0	0	0	0	0	0	0	0	0	0	0	0	0	0	0	0	0	0	0	0	0	0	0	0	0	0	0	0	0	0	0	0	0	0
ENSG00000279507.1	0.127243	0.110309	0.123898	0	0.0900213	0	0	0.0864035	0.200902	0.0826973	0.081358	0	0.122988	0.342489	0	0.0767188	0.0785621	0.0645171	0	0.390652	0.103922	0.0940152	0	0.149897	0.217341	0	0.0763409	0.123941	0.283317	0.207482	0	0	0.088505	0.188329	0	0	0	0.187765	0.112978	0	0.185613	0.764093	0.365762	0	0.377783	0.212362	0.739561	0.0908309	0.456605
ENSG00000260657.2	0.0591266	0	0.0575721	0	0.0557741	0.104314	0	0	0.0933538	0.0512364	0.0504066	0.040314	0	0.0707313	0	0	0.0973487	0	0.0909605	0.121017	0	0	0.0652204	0	0	0.0259358	0.0236491	0.0191974	0	0	0.0311538	0.0453732	0	0.0875117	0	0.0343537	0	0.0872495	0.104996	0	0	0	0	0	0.175546	0	0	0	0
ENSG00000235049.1	0.370359	0.203344	0.384664	0.328544	0.0873399	0.0588065	0.81612	0.720936	1.52036	0.304889	0.284165	0.227268	1.34837	0.454125	0.916281	0.893203	0.739353	0.707327	1.54785	0.909638	0.332728	1.14018	0.398316	0.494468	0.379561	0.852902	0.829549	0.78162	0.515396	0.75488	0.468341	0.412105	0.8501	1.1694	0.300145	0.182908	0.474989	2.30448	2.2361	0	0.0180084	0	0.0118289	0.0613227	0.128285	0	0.0478354	0	0.189859
ENSG00000243989.6	3.07336	2.13607	3.22904	2.85749	0.431116	12.1251	2.97105	2.72262	4.40626	2.68045	2.39988	3.64905	4.13149	2.35332	2.52829	3.16824	3.92595	3.03154	2.96863	2.18266	3.71462	4.11091	1.93616	3.12634	3.24325	2.49287	2.87711	2.93339	4.22776	1.57686	3.11306	1.67736	5.09239	3.15017	1.44575	4.64123	1.79296	2.3979	2.65039	3.96299	3.67158	5.48007	3.8587	2.45664	3.18579	1.90137	7.16342	3.83298	5.25623
ENSG00000273312.1	0	0	0	0	0	0.0213958	0	0	0.0106376	0	0.00861571	0	0	0	0	0	0	0.0136646	0	0.0103424	0	0.00995609	0	0.0158739	0	0	0.0161688	0	0	0.0439441	0	0	0.0187451	0	0.0218405	0	0.0220617	0	0.0358927	0	0.0196562	0	0	0	0	0	0.00870207	0.0288566	0.0138154
ENSG00000253796.1	0.0651942	0	0.158701	0.319607	0.0230616	0.0172529	0.311267	0.177079	0.154401	0.105927	0.104211	0.0833458	0	0.0292462	0.0648052	0.117923	0.281764	0.0495839	0.150443	0.0750579	0.0798682	0.0481696	0.134838	0.0192003	0.148476	0.0428961	0.156456	0.0476268	0.10887	0	0.0515263	0.0750443	0.0453464	0.0482461	0	0.0852281	0.0533696	0.240508	0.0578854	0	0.0475503	0.130497	0.0937007	0	0	0	0	0.0930762	0.0668417
ENSG00000181163.12	69.2584	76.8509	76.9239	66.463	66.1428	53.0768	64.2634	71.2298	64.2571	112.706	78.1042	43.2781	91.7787	75.0615	61.7598	64.105	70.6988	75.0135	98.0594	70.2335	46.621	74.8169	142.239	73.924	90.0979	69.4237	84.8142	72.8057	60.7362	68.8023	82.109	100.472	75.0708	60.3424	94.2911	128.245	91.3932	99.2199	110.095	41.3102	249.651	201.565	330.59	127.921	114.07	191.803	149.067	122.282	260.316
ENSG00000164616.13	0	0	0	0	0	0	0	0	0.00761396	0	0	0	0	0	0	0	0	0.00489026	0	0	0	0.0142523	0.00797909	0.00568093	0	0	0	0	0	0.00786333	0.00762273	0	0	0	0.0156325	0	0	0	0.0085635	0	0.0140691	0	0	0	0	0	0	0	0
ENSG00000170165.5	0	0.0444093	0	0	0.0241611	0.0723016	0	0.0231901	0.0134802	0.0110977	0	0.00873193	0.0330091	0	0	0	0.0737994	0	0	0.0524242	0	0	0	0.130752	0.0388886	0.0674118	0.0102447	0	0.0190101	0	0.0404871	0	0	0	0.0138383	0.0148819	0.0139785	0.0377961	0.0606451	0	0.0498173	0	0.049084	0	0.0506971	0	0	0.0365676	0
ENSG00000156466.9	0.145018	0.319393	0.106858	0.0548983	0.454753	0.219891	0.0806099	0.324696	0.0742593	0.183404	0.0501206	0.208443	0.0984967	0.189891	0.0935044	0.170145	0.0774371	0.119237	0.120592	0.270744	0.192064	0.16217	0.194551	0.110813	0.0624834	0.221782	0.206931	0.164161	0.0741784	0.479321	0.0433678	0.297764	0.0272617	0.243642	0.527274	0.0546541	0.436359	0.242912	0.18096	0.2414	0.0343041	0.141216	0.112664	0.0778753	0.0581832	0.170074	0.00506229	0.290973	0.0160738
ENSG00000225644.1	0	0	0.138474	0.39839	0	0	0	0	0	0.184853	0	0	0	0.255188	0	0	0	0.144215	0	0.218306	0	0	0	0.167532	0.161941	0	0	0	0	0.231891	0	0	0.197835	0	0	0	0	0	0	0	0	0.569324	0	0	0.422228	0	0	0	0
ENSG00000276723.1	0	0	0	0	0	0	0	0	0	0	0	0	0	0	0	0	0	0	0	0	0	0	0	0	0	0	0	0	0	0	0	0	0	0	0	0	0	0	0	0	0	0	0	0	0	0	0	0	0
ENSG00000085117.10	7.02028	10.9933	12.5461	7.72821	5.80711	64.1245	11.2173	11.4633	7.02225	11.4646	10.373	6.28334	9.96038	7.08193	10.9074	8.43529	11.479	6.45871	10.8606	9.17272	5.89141	9.53862	7.93327	7.8739	9.32648	9.92578	6.41444	9.19066	8.32948	7.2639	11.1309	9.78611	6.25185	10.6394	17.1898	5.83149	8.16644	19.61	11.4371	26.5716	7.25512	14.3387	24.4654	13.2236	12.7906	30.9573	18.6986	40.7088	12.3337
ENSG00000277452.1	0.145542	0.841153	0	0.135905	0.068645	0.205419	0.356351	0.329431	0.229794	0.12612	0.124078	0	0.187567	0.0870539	0.0642994	0.117003	0.119814	0.245985	0	0.446833	0.554715	0.0716905	0.0802713	0.285756	0.055244	1.02147	0.349279	0.0472552	0	0.23732	0.230059	0	0.134977	0.933458	0.0786333	0	0.238289	0.143179	0	0	0.141538	0.388435	0.371878	0	0.720188	0.485806	0.313303	0	0.0994802
ENSG00000256686.1	0	0	0	0	0.0531732	0	0	0	0	0	0	0	0	0	0	0	0	0.0190543	0	0	0	0	0	0	0	0	0	0	0	0	0	0	0	0	0	0.0327517	0	0	0	0	0	0	0	0	0	0	0	0	0.0192646
ENSG00000223774.4	0.281035	0.0374821	0.105249	0.18168	2.99767	0.48056	0.0317583	0.322951	0.102397	0.224799	0.0552895	0.0663289	0	0.659456	0.257869	0.729915	0.0266947	0.065767	0.964461	1.09511	0.0706237	0.0638911	0.715383	0.101867	0	0.455172	0.28534	0.0421141	0.120336	1.23376	0.0341717	1.49306	0.0601465	0.0639927	0.560628	0.113045	0.920247	0.0638009	0.153556	0	0	0.259632	0	0	0	0	0	0	0
ENSG00000263384.1	0	0	0	0	0	0	0	0	0	0	0	0	0	0	0	0	0	0	0	0	0	0	0	0	0	0	0	0	0	0	0	0	0	0	0	0	0	0	0	0	0	0	0	0	0	0	0	0	0
ENSG00000260296.1	0.250747	0.239114	0.231947	0.842919	0.496712	0.265429	0.221018	0.715125	0.455285	0.244447	0.144293	0.243626	0.339306	0.742404	0.232634	0.287248	0.356076	0.406842	0.405038	0.461895	0.245748	0.500222	0.228187	0.236311	0.271254	0.44546	0.376096	0.293088	0.3629	0.633742	0.317085	0.5484	0.226732	0.501018	0.284493	0.109267	0.738963	0.407013	0.467536	0	0.182886	0.250955	0.192207	0.124553	0.223339	0.0418484	0.437217	0.447481	0.385625
ENSG00000274732.1	0	0	0	0	0	0	0	0	0	0	0	0	0	0	0	0	0	0	0	0	0	0	0	0	0	0	0	0	0	0	0	0	0	0	0	0	0	0	0	0	0	0	0	0	0	0	0	0	0
ENSG00000279696.1	0.174879	0.295231	0.201649	0.296517	0.240933	0.209476	0.18254	0.38125	0.399636	0.131602	0.205976	0.131788	0.26689	0.255997	0.189084	0.194231	0.335285	0.233342	0.226555	0.437997	0.263102	0.299226	0.205593	0.19517	0.314428	0.405757	0.248495	0.183788	0.235678	0.232627	0.240058	0.413196	0.217668	0.265645	0.320745	0.264715	0.331528	0.421041	0.326891	0.0404923	0.2551	0.552707	0.255755	0.228598	0.450894	0.168974	0.713282	0.50591	0.561485
ENSG00000274819.1	0	0	0	0	0	0	0	0	0	0	0	0	0	0	0	0	0	0	0	0	0	0	0	0	0	0	0	0	0	0	0	0	0	0	0	0	0	0	0	0	0	0	0	0	0	0	0	0	0
ENSG00000206786.1	0	0	0	0	0	0	0	0	0	0	0	0	0	0	0	0	0	0	0	0	0	0	0	0	0	0	0	0	0	0	0	0	0	0	0	0	0	0	0	0	0	0	0	0	0	0	0	0	0
ENSG00000232040.2	0.326279	0.120916	0.322552	0.272114	0.0951531	0.155554	0.358578	0.409289	0.393249	0.249285	0.296208	0.290394	0.500736	0.277096	0.36312	0.3514	0.427505	0.409169	0.509612	0.435862	0.292923	0.563122	0.34617	0.431313	0.538875	0.331038	0.472202	0.308108	0.371562	0.227432	0.326772	0.240827	0.509329	0.346521	0.274514	0.221412	0.269139	0.389587	0.54844	0.0876591	0.871974	0.508521	0.248195	0.0494878	0.0739478	0.315918	0.643391	0.266691	0.3524
ENSG00000271806.1	0.00345703	0.0419574	0.0235631	0.0290532	0	0.0439134	0.0152358	0.0375596	0.043666	0.00449356	0.00442079	0.0176782	0.00668285	0.0248133	0.0137456	0.0125061	0.0128066	0.0350569	0.0106366	0.0265338	0.0282343	0.0255427	0.00572	0.01629	0.0157464	0.0409435	0.0165927	0.00336732	0.011546	0.016911	0.0163936	0.0318348	0	0.0307	0.0280164	0.0180775	0.01132	0.00510134	0.0184168	0	0.0201715	0.0276793	0.0198746	0	0	0.0115392	0.0312557	0.0246776	0.0141776
ENSG00000130726.10	53.057	61.3612	57.5199	39.4874	56.2882	41.566	58.8212	59.8471	48.65	64.3051	50.7931	39.3984	45.7321	64.8018	58.7489	62.0325	64.6996	60.5279	55.3908	57.6165	38.2432	62.0906	38.4648	60.8932	60.7896	63.7065	59.604	57.3333	51.9941	59.9942	53.6682	58.7015	55.4601	59.0332	60.422	42.69	53.9397	65.1018	58.2994	283.643	118.819	206.848	117.166	128.39	109.995	138.678	110.258	81.9907	78.4353
ENSG00000156052.9	23.0529	17.2589	20.2288	24.6058	15.7226	10.7849	15.472	19.6732	18.4356	16.5909	20.7574	20.6073	16.0997	17.1237	18.341	17.8006	17.2366	20.2952	14.5393	20.8564	21.328	18.0014	15.0328	19.6196	18.6235	16.1055	20.6747	19.1701	20.8191	18.629	16.1843	19.3295	15.4639	17.1005	16.957	9.52406	19.4789	17.1623	18.9006	4.90965	4.74334	9.09304	10.4163	12.6739	6.91908	9.1739	6.64463	12.287	12.1688
ENSG00000155621.13	2.05058	1.83078	1.86318	2.91714	1.13912	1.91436	1.86402	1.76282	2.18758	2.08531	1.74194	2.09422	3.10128	2.06223	1.97938	1.78331	2.06748	2.25988	3.07384	1.97015	2.37276	1.96553	2.67376	2.07547	2.1756	1.76954	2.36253	2.03146	2.33809	1.4792	2.50363	2.27645	2.11002	1.95138	1.96204	2.83197	2.20636	1.98858	2.63132	1.25758	1.82963	2.34713	2.59924	1.70971	2.5461	3.03773	1.65014	1.99474	3.07434
ENSG00000275897.1	0.417187	0.283468	0.488561	0.30007	0.0478621	0.537098	0.281591	0.352196	0.792207	0.102592	0.194652	0.409376	0.31605	0.303488	0.396018	0.319518	0.348079	0.760364	0.234171	0.328858	0.469649	0.349899	0.0279842	0.298861	0.23753	0.304174	0.514122	0.450292	0.407963	0.0735419	0.418839	0.194683	0.399975	0.584092	0.0456886	0.314457	0.203066	0.274532	0.310349	0	0.0493429	0.0451388	0.0108037	0.0560079	0.100429	0.018818	0.152914	0.0402438	0.0231205
ENSG00000163632.11	0.1101	0.206804	0.134007	0.128513	0.103858	0.184532	0.0943508	0.186907	0.130376	0.11926	0.0586642	0.0844529	0.088682	0.13171	0.0729622	0.0442553	0.0906372	0.055825	0.112919	0.0845054	0.104908	0.081349	0.106267	0.129702	0.0313433	0.265625	0.0880745	0.0625585	0.102145	0.20945	0.101521	0.0211225	0.0765812	0.108638	0.11897	0.0159926	0.240349	0.0947732	0.146636	0	0.0803032	0.0367306	0.158242	0	0.190683	0.0612506	0.0237009	0.117891	0.178731
ENSG00000239689.1	0	0	0	0	0	0.0282262	0	0	0	0	0	0	0	0	0	0	0	0	0	0	0	0	0	0	0	0	0	0	0	0	0	0	0	0	0	0	0	0	0	0	0	0	0	0	0	0	0.0344403	0	0
ENSG00000202354.1	0	0	0	0	0	0	0	0	0	0	0	0	0	0	0	0	0	0	0	0	0	0	0	0	0	0	0	0	0	0	0	0	0	0	0	0	0	0	0	0	0	0	0	0	0	0	0	0	0
ENSG00000117013.13	1.49461	1.43099	0.644933	1.08802	8.31691	0.910363	1.01888	2.29354	1.14979	1.41536	0.815953	0.478795	0.710584	3.28553	1.27312	1.55976	0.946352	0.787716	1.58978	3.12475	0.736374	1.112	2.34101	0.576008	0.406729	2.56008	1.36067	0.952536	0.90339	4.13912	1.02504	3.00177	0.694668	0.975188	4.50217	0.235737	2.65712	0.690821	0.966809	1.03741	0.576674	1.2772	1.80091	1.10243	0.123549	0.56718	1.98866	0.0792137	3.53052
ENSG00000172554.10	0.0681629	0.146322	0.0758525	0.0545568	0.105633	0.0858975	0.123977	0.132244	0.0922467	0.164543	0.0249044	0.0829915	0.0690207	0.0815412	0.0989455	0.0665389	0.0521052	0.0493731	0.0798949	0.0697562	0.0159057	0.105523	0.123523	0.042061	0.0702262	0.0939702	0.0428425	0.0695557	0.0686579	0.0740973	0.0256536	0.127033	0.0270921	0.139319	0.152569	0.0339463	0.175371	0.100584	0.224793	0	0	0.0129942	0	0	0.0289106	0	0.00419234	0.00463402	0
ENSG00000260364.1	0	0	0	0	0	0	0	0	0	0	0	0	0	0	0	0	0	0	0	0	0	0	0	0	0	0	0	0	0	0	0	0	0	0	0	0	0	0	0	0	0	0	0	0	0	0	0	0	0
ENSG00000230189.5	0.0871928	0.329842	0.0926188	0.33308	0.112158	0.0839073	0.186315	0.333716	0.425517	0.175156	0.0912277	0.105389	0.183877	0.128012	0.178598	0.124259	0.25449	0.208993	0.207304	0.304196	0.246006	0.210841	0.262307	0.168081	0.144419	0.3025	0.247294	0.138977	0.0970709	0.155101	0.31324	0.0912423	0.242591	0.316764	0.308346	0.193432	0.142756	0.245634	0.309671	0.0697441	0.578139	0.698122	0.486083	0.314991	0.423612	0.211666	0.757612	0.248966	0.333204
ENSG00000225814.1	0	0	0	0	0	0	0	0	0.0341833	0	0	0	0	0	0	0	0	0	0	0	0	0	0	0	0	0	0	0	0	0	0	0	0	0	0	0	0	0	0	0	0	0	0	0	0	0.2168	0	0	0
ENSG00000226420.1	0.118899	0	0.17366	0	0	0	0.17467	0	0	0.0772745	0	0	0	0	0.0787932	0.143376	0.220232	0.361719	0.182915	0	0	0.0878502	0	0.0700337	0.338482	0	0.0713349	0	0	0	0.0939721	0	0	0	0	0	0.292002	0	0	0	0	0	0	0	0	0	0	0	0
ENSG00000151033.8	0	0	0	0	0	0	0	0	0	0	0	0	0	0	0	0	0	0	0	0	0	0	0	0	0	0	0	0	0	0	0	0	0	0	0	0	0	0	0	0	0	0	0	0	0	0	0.0229041	0	0
ENSG00000243195.1	0	0	0	0	0	0	0	0	0	0	0	0	0	0	0	0	0	0	0	0	0	0	0	0	0	0	0	0	0	0	0	0	0	0	0	0	0	0	0	0	0	0	0	0	0	0	0	0	0
ENSG00000264147.1	0	0	0	0	0	0	0	0	0	0	0	0	0	0	0	0	0	0	0	0	0	0	0	0	0	0	0	0	0	0	0	0	0	0	0	0	0	0	0	0	0	0	0	0	0	0	0	0	0
ENSG00000164904.14	10.4086	11.3361	7.05912	9.11967	6.22191	8.68512	8.60902	11.5332	8.08276	6.07037	9.64924	4.11729	10.4155	8.58724	9.28311	7.53485	11.0516	10.7722	9.39317	6.08956	6.19184	11.2	6.83464	10.4097	12.787	8.9602	10.311	9.59876	12.1579	5.89697	8.98455	10.7224	8.28364	7.76333	8.11041	12.7391	7.80079	9.09048	7.70049	7.22095	7.83813	11.4529	7.23203	2.50224	6.5682	5.87105	13.5711	5.06724	7.62229
ENSG00000248359.1	0.0426639	0	0.124627	0.119517	0	0.0451619	0.188028	0.115882	0.202084	0.0554558	0.163673	0.261804	0.412371	0	0	0.514467	0.210731	0.0865288	0.656342	0.0654917	0.418134	0.0630455	0.141183	0.251297	0.145747	0.112287	0.30716	0	0.0949945	0.0695674	0.202316	0	0.178051	0.694603	0	0	0.0698514	0.125913	0.378809	0	0.12447	0.683189	0.0817585	0	1.01335	0	0.165314	0	0.831098
ENSG00000212571.1	0	0	0	0	0	0	0	0	0	0	0	0	0	0	0	0	0	0	0	0	0	0	0	0	0	0	0	0	0	0	0	0	0	0	0	0	0	0	0	0	0	0	0	0	0	0	0	0	0
ENSG00000131409.11	0.632098	1.06372	0.855337	0.429663	1.27582	0.718307	0.976386	1.60958	0.990669	0.688712	0.332835	0.499113	0.59299	1.251	0.696086	0.829478	0.499314	0.640995	0.636364	0.627847	0.630126	1.21566	0.792091	0.585851	0.534544	1.4679	0.97597	0.801309	0.496735	0.977643	0.448151	0.7704	0.471989	0.646631	1.12999	0.291649	0.753347	0.699561	0.775824	0.36805	0.352552	0.148852	0.151414	0.36939	0.33118	0.108597	0.222113	0.265421	0.195374
ENSG00000228670.4	0	0	0	0	0	0	0	0	0.0315032	0.0259353	0	0	0	0	0	0	0	0	0	0	0.0325918	0	0	0	0	0	0	0	0	0	0	0	0	0	0	0	0	0	0	0	0	0	0	0	0	0	0	0	0
ENSG00000128272.13	77.8312	97.7107	64.7957	81.2392	138.212	90.359	80.823	54.461	94.1985	123.915	67.0856	76.373	94.4747	96.5169	62.678	90.2078	89.853	77.8969	132.225	93.7985	92.0437	78.1192	143.663	65.0495	65.395	97.9343	77.2664	58.9507	66.0352	105.413	107.304	132.769	75.4109	88.8244	120.026	142.785	102.886	77.3533	123.252	89.3015	148.641	73.4089	177.236	146.401	122.281	159.662	80.6061	122.873	88.725
ENSG00000146072.6	37.5212	65.6221	43.815	44.818	26.1143	18.7891	42.75	26.1004	42.6776	31.5316	26.9756	44.5933	36.8631	41.8131	46.2857	39.8591	53.1336	37.2637	23.4268	29.0309	70.0743	33.7422	17.8723	31.7665	45.9286	23.4694	32.1631	51.0423	40.5546	53.2207	34.0462	36.8874	46.0949	41.5774	34.0931	27.1903	38.2039	48.1156	38.2695	21.8341	43.4146	31.7089	23.143	18.8002	27.194	19.8658	19.5277	30.6292	43.9922
ENSG00000271789.1	0.094261	0.290547	0.142773	0.381419	0.0444582	0.243907	0.246178	0.170686	0.214972	0.0816823	0.120539	0.128539	0.141725	0.169142	0.0277625	0.126295	0.245726	0.223038	0.0805619	0.160774	0.171078	0.185722	0.0693173	0.197409	0.190821	0.22052	0.150808	0.193831	0.1749	0.0512337	0.231775	0.0482234	0.145698	0.0930088	0.0339514	0	0.188624	0.15455	0.0557957	0.0921528	0.244446	0.461214	0.260919	0.104049	0.404241	0.174796	0.622264	0.239243	0.848311
ENSG00000257510.1	0	0	0	0	0	0	0	0	0	0	0	0	0	0	0	0	0	0	0	0	0	0	0	0	0	0	0	0	0	0	0	0	0	0	0	0	0	0	0	0	0	0	0	0	0	0	0	0	0
ENSG00000279435.1	0	0	0	0	0	0	0	0	0	0.0260788	0	0	0	0	0	0	0	0	0	0	0	0	0	0	0.0228464	0	0	0	0	0	0	0	0	0	0	0	0	0	0	0	0	0	0	0	0	0	0	0	0
ENSG00000280900.1	0	0	0	0	0	0	0	0	0	0	0	0	0	0	0	0	0	0	0	0	0	0	0	0	0	0	0	0	0	0	0	0	0	0	0	0	0	0	0	0	0	0	0	0	0	0	0	0	0
ENSG00000274649.1	0	0	0	0	0	0	0	0	0	0	0	0	0	0	0	0	0	0	0	0	0	0	0	0	0	0	0	0	0	0	0	0	0	0	0	0	0	0	0	0	0	0	0	0	0	0	0	0	0
ENSG00000259072.1	0	0.0240905	0	0	0	0	0	0	0	0	0	0	0	0	0	0	0	0	0	0	0	0	0	0	0	0	0.0166721	0	0	0	0	0	0	0	0	0	0	0	0.0246734	0	0	0	0	0	0	0	0	0	0
ENSG00000231911.1	0.0301574	0	0.0293646	0	0	0	0	0	0	0	0	0	0	0	0	0	0	0	0	0	0	0	0	0	0	0	0	0	0	0	0	0.0694276	0	0	0.0488801	0	0	0	0	0	0	0	0	0	0	0	0	0	0
ENSG00000225969.1	48.4044	12.6203	40.6519	18.206	3.67829	49.6975	44.7964	21.2181	21.9177	44.0288	35.2376	63.3303	49.2983	16	40.5872	29.4353	29.34	33.1368	50.5901	11.2533	33.9702	37.8002	43.0988	34.1152	25.517	20.1835	29.4774	43.5273	31.7772	14.285	48.2417	21.2457	53.8834	26.9716	13.7782	35.8421	22.3449	11.4315	29.9137	22.1869	18.3537	1.66512	6.27694	3.87388	22.6913	0.694174	6.84955	25.9425	2.55867
ENSG00000275928.1	0	0	0	0	0	0	0	0	0	0	0	0	0	0	0	0	0	0	0	0	0	0	0	0	0	0	0	0	0	0	0	0	0	0	0	0	0	0	0	0	0	0	0	0	0	0	0	0	0
ENSG00000224132.2	0	0	0.0807107	0	0.23457	0.131615	0.0608851	0.168857	0.0654366	0.107743	0	0.0847746	0.0801178	0.148738	0.0549301	0	0.20471	0.0420283	0	0.127241	0.0676978	0	0.137149	0	0	0	0.0497306	0	0	0	0.0655119	0.0954134	0	0.0613415	0.268701	0.144482	0.271422	0	0.294389	0	0.120914	0.165917	0	0	0.123049	0.138339	0	0	0
ENSG00000253911.1	0.0481918	0	0	0	0	0.0510134	0	0	0.076089	0.0626412	0	0	0	0.172951	0	0	0	0.0488701	0	0.0739773	0	0	0	0	0	0.0634178	0	0	0	0.0785811	0	0	0	0.0713274	0.156222	0	0	0	0	0	0	0	0	0	0	0	0	0	0
ENSG00000007968.6	5.46257	5.60436	3.66504	3.93177	0.473911	2.06535	3.96752	5.56668	3.76887	7.98495	8.76663	3.80336	3.54562	3.74911	3.6147	3.06437	4.13257	4.29679	4.09754	4.766	2.91348	5.10256	2.76209	7.94444	5.52414	6.27197	5.22459	5.18877	5.67895	2.44028	6.3363	2.77218	4.82199	6.68046	3.63635	4.23954	3.81245	5.49938	3.79989	4.65433	1.46572	2.94772	5.40981	7.31501	2.36763	10.0173	6.36878	2.4402	3.31676
ENSG00000131386.16	1.21583	2.92736	1.64647	0.665456	3.02506	0.927413	0.930592	5.84513	0.629131	1.43429	0.829654	0.297808	0.878912	2.0442	2.36638	1.11808	0.586664	1.14229	1.44213	1.17237	1.19327	0.728481	1.23408	0.291875	1.50666	5.0621	5.48622	1.42064	1.30239	1.641	0.500655	6.91533	0.56142	1.02074	5.0757	0.934973	2.04081	0.591762	5.80133	0.337115	0.268271	0.337444	0.82723	0.609016	0.546019	0.315459	0.0923746	0.576174	0.120466
ENSG00000259783.4	0	0	0	0	0	0.0258502	0.0358751	0	0.0385569	0	0	0	0	0	0	0	0	0	0	0	0.0398893	0	0	0	0	0.032136	0.0586051	0.0475734	0	0	0	0.05622	0.0339716	0	0	0	0.0399823	0.0360357	0.130096	0	0	0	0	0	0.145007	0	0.0315413	0	0.0250375
ENSG00000279313.1	0	0	0	0	0	0	0	0	0	0	0	0	0	0	0	0	0	0	0	0	0	0	0	0	0	0	0	0	0	0	0	0	0	0	0	0	0	0	0	0	0	0	0	0	0	0	0	0	0
ENSG00000254633.1	0	0	0	0	0	0	0	0	0	0	0	0	0	0	0	0	0	0.0109693	0	0	0	0	0	0	0.0123176	0	0	0	0	0	0	0	0	0	0.0175327	0	0	0	0	0	0.0315584	0	0	0	0	0	0	0	0
ENSG00000227914.3	0.036054	0.0208372	0	0.0673335	0.0510146	0	0	0.0163215	0	0.0312427	0	0	0.0464644	0.0215651	0.0159284	0	0	0.0365615	0.0554655	0	0.0588921	0.0177593	0.0795397	0	0	0	0	0	0	0.0391929	0	0.0276675	0.0167184	0	0.0194792	0.0418962	0.0787057	0	0.0426827	0	0	0.24056	0	0	0	0	0.0310448	0	0.0492868
ENSG00000230246.6	0.0186889	0	0.0090988	0.00872573	0.00440732	0.0362692	0.00457586	0.00846038	0.00491793	0.00404874	0.00796634	0.00637129	0.00602131	0.0167677	0.00825662	0.00751209	0.0153852	0.00947599	0	0.0191258	0	0.0184114	0	0.0183468	0.0106407	0.0163958	0.00747508	0.012136	0.0208062	0.025395	0.0049236	0	0.00433308	0.0138305	0	0.00542932	0.00509973	0.0183854	0.00553124	0	0	0	0	0	0	0	0	0	0.00319353
ENSG00000235979.7	0.00345951	0.00599821	0.00336856	0	0.0587404	0.00366207	0	0.0046983	0.0163865	0.0134903	0	0.00353817	0.00668763	0.0310388	0.0091703	0.00834338	0.00427192	0.017541	0.00532212	0.0106211	0.0056509	0.0051122	0.00572409	0.00407542	0.00393941	0.00910506	0	0.0101092	0.00385143	0.00564105	0.0218738	0.00796439	0.00962515	0	0.039251	0	0.0113281	0.00510499	0.0245733	0	0	0.0276991	0	0	0	0	0.00446829	0.00493905	0
ENSG00000275362.1	0	0	0	0	0	0	0	0	0	0	0	0	0	0	0	0	0	0	0	0	0	0	0	0	0	0	0	0.044154	0	0	0	0	0	0	0	0	0	0	0	0	0	0	0	0	0	0	0	0	0
ENSG00000278585.1	0	0	0.0802521	0.230885	0	0	0	0	0.13013	0	0	0	0	0	0	0	0	0	0	0	0	0	0	0	0	0	0	0	0	0	0	0	0	0	0	0	0	0	0	0	0	0	0	0	0	0	0	0	0
ENSG00000211668.2	402.244	341.103	228.956	341.442	11.1861	53.781	325.401	162.82	424.962	475.711	140.142	104.294	277.258	236.865	251.614	582.436	519.005	195.127	326.31	388.061	140.862	516.916	162.428	146.403	221.877	56.1687	298.16	221.936	267.832	91.0637	689.309	309.903	277.917	199.13	54.1349	298.861	73.6233	613.099	129.825	29.0362	75.435	0	14.2464	13.6903	145.352	3.87349	2.15459	226.561	1.26414
ENSG00000113805.8	1.52468	1.69344	1.55647	2.63269	1.65115	0.390714	1.12618	2.27115	2.34004	0.549891	0.784247	0.667876	2.27777	1.83411	1.83638	1.34895	1.73547	1.74192	1.72532	1.54288	1.51654	1.75377	0.662391	1.52185	1.65535	2.57058	2.3303	1.59297	1.77011	1.05556	0.951456	1.37919	1.35476	2.7399	0.796137	1.55398	1.80364	1.70521	3.03522	0.0499635	0.124251	0.0568321	0.0163229	0.0282068	0.345617	0.00947712	0.00733433	0.0162141	1.89797
ENSG00000207453.1	0	0	0	0	0	0	0	0	0	0	0	0	0	0	0	0	0	0	0	0	0	0	0	0	0	0	0	0	0	0	0	0	0	0	0	0	0	0	0	0	0	0	0	0	0	0	0	0	0
ENSG00000176593.6	0.132065	0.194632	0.189675	0.208104	0.576948	0.139798	0.208563	0.230921	0.35187	0.124455	0.12244	0.0877943	0.363799	0.216243	0.20348	0.127402	0.434197	0.269522	0.248883	0.205262	0.218417	0.322008	0.333235	0.10307	0.187982	0.284583	0.390227	0.0948706	0.176432	0.309558	0.198318	0.319239	0.135492	0.276096	0.353192	0.140996	0.254063	0.292321	0.269697	0.0435752	0.0385294	0.350264	0.126541	0.0492005	0.205852	0.0165308	0.0490404	0.0659912	1.06968
ENSG00000237541.3	4.10234	13.78	44.9774	5.11946	0.915808	0.151132	13.1718	3.59357	19.0256	7.33662	14.3017	18.1551	5.72233	19.1803	0.163997	4.24672	14.3979	14.7775	11.9632	0.102277	0.0155474	16.9908	37.671	17.8619	2.18939	15.757	18.0796	3.90317	4.67306	4.5164	53.4412	22.7233	28.0575	1.76095	17.4484	4.52928	0.109085	8.80647	19.4714	65.6583	10.3578	9.14505	2.06113	7.1865	29.9266	42.9541	2.61855	10.0422	1.09298
ENSG00000264871.1	0	0	0	0	0	0	0	0	0	0	0	0	0	0	0	0	0	0	0	0	0	0	0	0	0	0	0	0	0	0	0	0	0	0	0	0	0	0	0	0	0	0	0	0	0	0	0	0	0
ENSG00000280352.1	0	0	0	0	0	0	0	0	0	0	0	0	0	0	0	0	0	0	0	0	0	0	0	0	0	0	0	0	0	0	0	0	0	0	0	0	0	0	0	0	0	0	0	0	0	0	0	0	0
ENSG00000147889.15	0.522729	0.238201	0.28712	0.112642	0.165944	0.900943	0.334735	0.150173	0.306852	0.204709	0.158544	0.274161	0.369219	0.186395	0.253143	0.303047	0.281365	0.166501	0.520647	0.169743	0.191568	0.386225	0.543338	0.248685	0.164073	0.260161	0.148767	0.290484	0.290974	0.207625	0.386655	0.223711	0.321636	0.163662	0.293281	0.175221	0.148126	0.365901	0.785444	13.3853	1.54459	0.134144	0.68066	1.5313	1.66141	2.52775	4.94248	0.43055	0.346986
ENSG00000263825.1	0	0	0	0	0	0	0	0	0	0	0	0	0	0	0	0	0	0	0	0	0	0	0	0	0	0	0	0	0	0	0	0	0	0	0	0	0	0	0	0	0	0	0	0	0	0	0	0	0
ENSG00000206722.1	0	0	0	0	0	0	0	0.189423	0	0	0	0	0	0	0	0	0	0	0	0	0	0	0	0	0	0	0	0	0	0	0	0	0	0	0	0	0	0	0	0	0	0	0	0	0	0	0	0	0
ENSG00000229129.1	0.0386819	0	0.037665	0.0361207	0.0182443	0	0.0568261	0	0.020358	0.01676	0	0	0	0	0	0	0	0.0261509	0	0	0	0.0190537	0	0	0	0	0.0154718	0.0251187	0.0287094	0	0.0203815	0.0296842	0	0	0	0	0.0211106	0	0	0	0	0	0	0	0	0	0	0.0552252	0
ENSG00000279168.1	0	0.0520714	0	0	0.0424945	0.063582	0	0	0	0	0	0	0	0.107781	0	0	0.0370852	0	0	0	0	0	0	0.0707587	0	0	0	0.0292532	0	0	0	0.0691402	0	0	0	0	0.0983414	0	0	0	0	0	0	0	0	0	0.03879	0	0
ENSG00000229977.2	0	0	0	0	0.0493386	0	0	0	0	0	0	0	0	0	0	0	0	0	0	0	0	0	0	0	0	0	0	0	0	0	0	0	0	0	0.0565177	0	0	0	0	0	0	0	0	0	0	0	0	0	0
ENSG00000251615.3	0.857217	0.495424	0.895543	1.21319	2.55218	1.3233	1.06254	0.951954	0.993935	0.568725	0.94775	0.589039	0.604151	1.57825	1.00595	0.947545	1.18532	0.846645	0.71432	0.973204	0.984525	1.14138	0.465396	0.736335	0.625333	1.31019	1.18931	0.608834	0.750541	1.87097	0.776303	1.1923	0.583822	1.07711	1.55584	0.233466	1.86399	0.560001	0.515339	0	0.208408	1.17965	0.385012	0.266128	0.516966	0.312955	0.0980315	1.11547	0.31127
ENSG00000178947.8	0.230205	0.158693	0.180943	0.108776	0.788814	0.199645	0.224099	0.203403	0.179544	0.115365	0.0673887	0.141831	0.209103	0.492712	0.279377	0.311041	0.16097	0.180006	0.302947	0.24694	0.126853	0.225421	0.26158	0.189506	0.135807	0.375936	0.252932	0.151289	0.191442	0.483912	0.179751	0.58744	0.154334	0.270935	0.633862	0.18371	0.485888	0.167804	0.423571	0.0732113	0.299394	0.421931	0.116932	0.0826625	0.131754	0.0185157	0.0644818	0.0989935	0.361143
ENSG00000269110.1	0	0	0	0	0	0	0	0	0	0	0	0	0	0	0	0	0	0	0	0	0	0	0	0	0	0	0	0	0	0	0	0	0	0	0.0450409	0.0484374	0	0	0	0	0	0	0	0	0	0	0.0358919	0.0396733	0
ENSG00000232520.1	0.0192129	0.0777278	0.0187078	0.0897036	0.0181235	0	0.103491	0.00869757	0.131451	0.033298	0.0163794	0.0261997	0.0371407	0.0229838	0.0339524	0.0463361	0.0869907	0.0779332	0.0295571	0.0491549	0.0836883	0.0757102	0.0317896	0.0452668	0.0218781	0.058994	0.0922157	0.0249524	0.0213895	0.0313284	0.0506163	0.0147438	0.00890911	0.123225	0.0311409	0.0334892	0.0419417	0.0378017	0.0454905	0	0.0186842	0	0	0.063624	0	0.0213769	0.0165435	0	0.0196984
ENSG00000255300.4	0	0	0	0	0	0	0	0	0	0	0	0	0	0	0	0	0	0	0	0	0	0	0	0	0	0	0	0	0	0	0	0	0	0	0	0	0	0	0	0	0	0	0	0	0	0	0.479415	0	0
ENSG00000143919.13	1.34844	1.7519	1.27052	1.77164	1.01313	1.13499	1.46301	1.4907	1.35431	1.63936	1.22239	0.929313	1.94623	1.31091	1.44035	1.23158	1.5125	1.57014	2.10799	1.59011	1.46642	1.36422	1.65981	1.59279	1.94523	1.41575	1.44793	1.72766	1.51739	1.19717	1.46503	1.46431	1.66348	1.60309	1.1252	2.15401	1.55315	1.83964	1.88465	0.479698	1.74963	3.37572	2.84178	2.23872	2.23375	0.946292	2.92464	1.26612	5.22449
ENSG00000243961.2	0	0	0	0	0	0.0148215	0	0.0190154	0	0.0181998	0	0.0286401	0	0.200997	0.0185575	0.0168841	0	0	0	0.214934	0.0228709	0.0206906	0.0463342	0.0329889	0	0	0	0	0.0311758	0	0	0	0	0	0.204249	0.0244057	0	0	0	0	0	0.0560532	0.0268319	0	0	0.0934722	0.072338	0.0399796	0.057422
ENSG00000012817.14	0.00306578	3.98666	3.5643	4.83524	5.81498	0	0.00450382	5.66455	5.83764	3.30954	0.00392045	0.00783872	0	5.31145	0	2.74125	4.75677	4.53748	3.43118	5.64033	0.0100155	0.00906075	2.93198	0.00722318	0	0.0020172	0.00367869	0.00447933	0.00170655	5.00153	4.691	0.00705795	0.00426485	0.00680636	0.00496911	2.77345	4.29915	5.14829	0.00816623	0.121387	0.00894426	0.852994	5.57838	3.56349	0	0	6.78107	0.00218846	0.00157162
ENSG00000202281.1	0	0.220618	0	0	0	0	0	0.172807	0	0	0	0	0	0	0.168645	0	0	0	0	0	0	0	0	0	0	0	0	0	0	0	0	0	0	0	0	0	0	0	0	0	0	0	0	0	0	0	0	0	0
ENSG00000171049.8	0.258751	0.163138	0.0954349	0.197687	0.0277363	0.14525	0.161263	0.127784	0.167129	0.881598	0.506355	0.140336	0.0833658	0.34471	0.114314	0.0425478	0.338879	0.0159026	0.0542813	0.0300908	0.211327	0.0521403	1.68656	0.0600397	0.450895	0.0567504	0.12231	0.0572809	0.410274	0.0639268	0.154927	0.288819	0.0818073	0.0348155	0.629087	0.656026	0.898628	0.0404963	0.062657	1.79374	0.766331	0.0156949	1.42746	0.42843	0.640188	1.84514	0.106337	0.375009	0.0361758
ENSG00000248439.2	0	0	0	0	0	0	0	0	0	0	0	0	0	0	0	0	0	0	0	0	0	0	0	0	0	0	0	0	0	0	0	0	0	0	0	0	0	0	0	1.26786	0	0	0	0	0	0.48098	0	0	0
ENSG00000163811.10	6.18513	14.5361	6.87409	7.57616	4.76097	7.02317	5.83053	7.85138	8.0243	9.29053	6.5575	3.31555	8.134	6.85707	6.66609	4.8198	7.63761	7.45111	9.41796	9.13871	5.63957	7.82161	10.0014	6.95528	8.41895	6.82204	7.1688	6.55832	5.96694	8.10384	6.97314	7.26112	5.44299	7.78206	7.2925	15.0726	6.7223	9.1322	10.2475	7.78769	21.5185	23.369	24.3383	17.6908	18.082	17.0227	16.9255	14.9228	20.4179
ENSG00000125629.13	5.57828	3.35552	5.41732	6.39884	5.50794	8.19065	4.08393	5.13696	5.69381	4.67795	4.03396	4.90137	5.42367	5.58144	4.70174	4.95087	4.62996	5.0386	5.71167	5.10736	4.65487	5.05768	6.65955	4.76307	6.04264	4.17053	5.05427	4.37829	4.74251	5.01202	5.24759	6.43376	4.97582	4.77222	5.11297	4.49357	6.90839	5.16434	5.79741	1.84177	5.77478	5.95412	6.9741	5.10764	12.0261	5.54056	4.59139	7.14607	11.5326
ENSG00000276471.1	0	0	0	0	0	0	0	0	0	0	0	0	0.091638	0.170125	0	0	0.0585365	0	0	0	0	0	0.078435	0.0558439	0	0	0.113763	0	0	0	0	0	0	0.0701619	0	0	0.0776126	0.139903	0.0841797	0	0	0	0	0	0	0	0	0	0
ENSG00000244171.4	0.0337081	0	0.0547032	0.0944285	0.127187	0.0713635	0.0330129	0.213633	0.106442	0.0438148	0.0574737	0.0344746	0.0217206	0.080648	0.0446759	0.0812946	0.0277493	0.125336	0	0.068992	0.0183534	0.0830188	0.0743644	0.0794186	0.140742	0.0887162	0.0404471	0.0437778	0.0375269	0.0183214	0.195369	0.0517346	0.0468919	0	0	0.0195851	0.0183962	0.0829016	0.0399055	0.494313	0.131122	0.31487	0.0861282	0.223251	0.100079	0.0750095	0.116099	0.0962484	0.01152
ENSG00000257207.5	0.0951343	0.0392731	0.136744	0.0380722	0.13461	0.124682	0.0332758	0.135353	0.171664	0.011777	0	0.00926643	0.0788167	0.0325161	0.0480338	0.0874048	0.100693	0.165383	0.111508	0.0556332	0.0517988	0.140582	0	0.0160102	0.0825381	0.107307	0.266359	0.15003	0.201737	0.228994	0	0.250304	0.0126041	0.147511	0.330422	0.094757	0.0445024	0.160439	0.048268	0	0.0264333	0.217631	0.217035	0	0	0	0.0409584	0.0452736	0.074315
ENSG00000217327.3	0	0	0	0	0	0	0	0.033907	0.0788393	0.0324526	0	0	0	0	0.0661808	0	0	0.0253182	0	0	0	0	0.08262	0	0.0284302	0	0	0.0486378	0	0	0	0	0	0	0	0	0	0	0.0443356	0	0	0.1999	0	0	0	0	0	0	0
ENSG00000227015.1	0	0	0	0	0	0	0	0	0	0	0	0	0	0	0	0	0	0	0	0	0	0	0	0	0	0	0	0	0	0	0	0	0	0	0	0	0	0	0	0	0	0	0	0	0	0	0	0	0
ENSG00000202306.1	0	0	0	0	0	0	0	0	0	0	0	0	0	0	0	0	0	0	0	0	0	0	0	0	0	0	0	0	0	0	0	0	0	0	0	0	0	0	0	0	0	0	0	0	0	0	0	0	0
ENSG00000218728.3	0.0112885	0	0	0.0316231	0	0.0119494	0	0.0153307	0	0.0293463	0	0.0115452	0	0	0	0	0.0139394	0	0	0	0	0	0	0.0132982	0	0	0.0135453	0	0	0	0.0178437	0	0	0.0334156	0	0	0	0.0333155	0	0	0	0	0	0	0.0335153	0	0	0.0322326	0
ENSG00000229242.1	0	0	0	0	0	0	0	0	0	0	0	0	0	0	0	0	0	0	0	0	0	0	0	0	0	0	0	0	0	0	0	0	0	0	0	0	0	0	0	0	0.0528997	0	0	0	0	0	0	0	0
ENSG00000223864.1	0.0203732	0.0353237	0.0198376	0	0.0288271	0.0431321	0	0.0553371	0.0321669	0.105927	0.0521057	0.0625094	0	0	0.0810065	0.0245673	0.0251575	0.0826399	0	0.0312741	0.0332784	0.090318	0.0674189	0.0240003	0.0231994	0.0268101	0.0488925	0.0198445	0.0226813	0	0.0322039	0.140708	0.056683	0.0301538	0.0660431	0.0355117	0.033356	0.0300635	0.0361784	0	0	0.163121	0.0780839	0	0.0604877	0	0	0.0872589	0.0417761
ENSG00000272485.1	0	0	0	0	0.00842564	0.00630338	0.00874787	0.00808702	0.00940181	0	0	0	0	0.0213704	0.00789226	0	0	0	0.00916077	0.00914088	0	0	0	0.00701487	0	0.00783611	0	0.0058002	0.00662934	0	0.00941264	0	0	0.00881344	0.00965162	0	0.0194987	0.00878703	0	0	0	0	0	0	0	0	0	0.0850141	0
ENSG00000280041.1	0	0	0	0	0	0	0	0	0	0	0.0494657	0.0395615	0	0	0	0	0	0	0	0	0	0	0	0	0.132144	0	0	0	0	0	0	0	0	0	0	0	0.0633319	0	0	0	0	0	0	0	0	0	0	0	0
ENSG00000250751.1	0.0252273	0	0.0491282	0	0.0356954	0.0267044	0.0370605	0	0	0.0327913	0.0322602	0	0.0975347	0	0	0	0	0.0255824	0.0388098	0	0.0824148	0.223674	0.0417411	0.089156	0.0287269	0.0663957	0	0.0245727	0	0.0411355	0.0398768	0	0.0350941	0	0.122668	0	0	0.148906	0	0	0.0735996	0.100993	0	0	0	0.0842063	0	0.0360164	0
ENSG00000259770.2	0	0	0	0	0	0.0142045	0.019713	0.0364477	0.0423734	0	0	0	0	0	0.017785	0	0.01657	0	0	0	0	0.0198293	0.0222027	0	0	0	0	0	0	0	0	0	0	0	0.0217496	0	0	0	0	0.118068	0.0391487	0	0.025715	0.13331	0	0.268744	0	0	0
ENSG00000125249.6	7.2789	6.9446	6.26087	8.03231	5.50523	4.87667	6.61484	8.90213	8.42922	7.19672	6.50736	5.7611	8.86043	6.81337	6.37169	6.50372	6.988	7.24139	9.27081	7.74354	6.04905	6.89629	9.05751	7.24332	7.27738	5.55528	7.47165	7.02659	6.12041	6.71793	6.99813	7.96796	5.11181	7.38907	7.94405	7.21761	6.57054	7.31697	7.99593	4.42243	9.17055	11.9895	7.1466	5.04509	16.7784	8.02341	5.15648	8.9679	10.0421
ENSG00000231073.1	0	0.205031	0	0	0	0.208628	0.115814	0.267663	0.497887	0	0.0504066	0.040314	0	0	0	0	0.0486744	0.0399725	0.0606403	0.0605086	0.19316	0.116497	0	0.0464354	0.0448857	0.363102	0.141894	0.0383948	0	0.192823	0	0	0.0548346	0.175023	0.0638895	0.0687074	0	0.116333	0.139995	0.346825	0.114999	0.631207	0.453226	0	0.11703	0.131572	0.356383	0.168827	0.161655
ENSG00000178631.7	0.154179	0.445536	0.275231	0.143971	0.109078	0.272011	0.245374	0.383879	0.202859	0.28391	0.0985808	0.144545	0.124186	0.0691651	0.340576	0.170426	0.253848	0.234524	0.138361	0.177506	0.0839477	0.208849	0.148811	0.121086	0.073153	0.557953	0.138752	0.187723	0.128735	0.251404	0.243711	0.266211	0.51833	0.247213	0.208249	0.067186	0.0631075	0.265432	0.365052	0	0.337359	0.0514358	0.123108	0.51057	0.0381463	0.257318	0.431465	0.128402	0.118557
ENSG00000120251.17	0.0146014	0.00843882	0.00947838	0.0227244	0.0826412	0.0240432	0.0214504	0.0374566	0	0.0147618	0.00622401	0.0199113	0.00627251	0.0116448	0.0150519	0.0176073	0.00601012	0.00329044	0.00748763	0.0124523	0.0265007	0.00479487	0.0375814	0.0152898	0.0147795	0.0640491	0.021414	0.0079014	0.00361236	0.0634906	0.0025645	0.0560251	0	0.0144075	0.0394442	0.0113116	0.0451561	0.0095762	0.023048	0	0	0	0	0	0.00481682	0	0	0	0.00166338
ENSG00000257609.1	0	0	0	0	0	0	0	0	0	0	0	0	0	0	0	0	0	0	0	0	0	0	0	0	0	0	0	0	0	0	0	0	0	0	0	0	0	0	0	0	0	0	0	0	0	0	0	0	0
ENSG00000255208.1	0	0	0	0	0	0	0	0	0	0	0	0	0	0	0	0	0	0	0	0	0	0	0	0	0	0	0	0	0	0	0	0	0	0	0	0	0	0	0	0	0	0	0	0	0	0	0	0	0
ENSGR0000205755.9	0	0	0	0	0	0	0	0	0	0	0	0	0	0	0	0	0	0	0	0	0	0	0	0	0	0	0	0	0	0	0	0	0	0	0	0	0	0	0	0	0	0	0	0	0	0	0	0	0
ENSG00000280279.1	0.0276827	0.0239986	0.0134774	0.0775491	0.0097924	0.0146518	0.0711682	0.0751908	0.0764884	0.0269871	0.00885001	0.0212341	0.0535138	0.0124185	0.0550349	0.0166907	0.0427294	0.105271	0.0212935	0.031871	0	0.0511342	0.0114509	0.0163056	0	0.118394	0.066434	0.00674107	0.0231141	0.0789935	0.0328185	0.0796629	0.00962745	0.0204862	0.0224345	0	0.0113308	0.0204248	0.0245792	0	0	0	0	0	0.0205473	0.0231005	0.0268161	0.0395218	0.0496689
ENSG00000217874.2	0	0	0	0	0	0	0	0	0	0	0	0	0	0	0	0	0	0	0	0	0	0	0	0	0	0	0	0	0	0	0	0	0	0	0	0	0	0	0	0	0	0	0	0	0	0	0	0	0
ENSG00000242539.2	0	0	0	0	0	0	0	0	0	0	0	0	0	0	0	0	0	0	0	0	0	0	0	0	0	0	0	0	0	0	0	0	0	0	0	0	0	0	0	0	0	0	0	0	0	0	0	0	0
ENSG00000200651.1	0	0.239528	0.134518	0.387007	0.195475	0	0.405901	0.187619	0	0.179571	0	0.141291	0	0	0.1831	0	0	0.140094	0	0.424137	0.225659	0	0	0	0	0.181798	0.165769	0	0	0	0	0	0	0	0.671753	0	0	0.203859	0	0	0	0	0.264742	0	0	0.46113	0.535301	0.197233	0.141641
ENSG00000052126.13	2.35871	2.36124	2.37431	2.69222	1.5821	2.19847	2.0329	2.60878	2.9089	1.74466	1.99558	1.56885	2.17488	2.13282	2.36989	1.95979	2.31497	2.61212	2.33143	2.27672	2.02263	2.67132	1.7889	2.17991	2.60041	2.45184	2.8067	2.40326	2.20027	2.26773	2.05227	2.32151	1.75471	2.20713	2.0894	2.12414	2.57012	2.67949	3.11578	1.555	2.76673	2.04391	2.187	1.36558	3.04879	0.882932	2.27816	3.25533	3.43917
ENSG00000267521.1	0.040182	0.174172	0.0195628	0	0.0284278	0	0.029515	0.136427	0	0	0.025692	0.0205479	0	0.144206	0.0532563	0	0.124045	0	0	0.030841	0	0.029689	0	0.0236679	0	0	0.0482153	0.0195697	0	0	0.190547	0	0.0838468	0.0892086	0.0325642	0.0350198	0	0.20753	0	0	0	0.0804308	0	0	0	0	0	0	0
ENSG00000253073.1	0	0	0	0	0	0	0	0	0	0	0	0	0	0	0	0	0	0	0	0	0	0	0	0	0	0	0	0	0	0	0	0	0	0	0	0	0	0	0	0	0	0	0	0	0	0	0	0	0
ENSG00000163874.8	14.8501	5.7692	10.3271	13.1672	2.48248	9.07903	12.0325	9.76467	13.3067	43.4748	6.26652	11.6562	8.86128	6.21292	4.28056	10.3762	9.22905	5.98401	6.42192	5.15067	8.55182	8.69934	13.1825	12.7956	5.02374	8.61046	6.23188	4.15221	4.68877	5.34979	23.7751	4.71404	11.5883	18.3355	6.81882	5.18341	7.96982	6.07065	4.23119	60.1101	26.9913	8.1415	41.3802	6.61132	18.3212	6.18242	10.9216	13.4077	12.8969
ENSG00000233406.5	0.400158	0.20236	0.275993	0.373662	0.0943672	0.123546	0.293928	0.452873	0.473851	0.390103	0.170571	0.102314	0.0644626	0.119674	0.309376	0.221162	0.0823548	0.253619	0.0256502	0.0767834	0.0817043	0.197108	0.0827625	0.314266	0.417695	0.153588	0.220072	0.389774	0.222746	0.108749	0.368975	0.153539	0.255139	0.148066	0.162147	0.145312	0.0818947	0.147622	0.14804	0.586812	0.291861	0.40049	0.319516	0.828209	0.445523	0.77915	0.366097	0.0714119	0.205135
ENSG00000238420.1	0	0.529484	0	0.427745	0	0	0	0.414737	0	0	0	0	0	0	0	0	0	0	0	0	0	0	0	0	0	0.200934	0	0	0	0.497956	0	0	0	0	0	0	0	0	0	0	0.445471	0	0	0	0	0	0.197216	0.217994	0.626202
ENSG00000252416.1	0	0	0	0	0	0	0	0	0	0	0	0	0	0	0	0	0	0	0	0	0	0	0	0	0	0	0	0	0	0	0	0	0	0	0	0	0	0	0	0	0	0	0	0	0	0	0	0	0
ENSG00000238198.1	0.0530913	0.0613676	0.0287197	0.0991519	0.200324	0.0749331	0.0606623	0.0961366	0.0372555	0.0690097	0.0377178	0.0422322	0.0342105	0.22229	0.0312737	0.0640208	0.101981	0.0418744	0.117976	0.0905538	0.0385429	0.0348686	0.126887	0.027797	0.040304	0.124205	0.056627	0.0976811	0.0853753	0.115427	0.0839214	0.203709	0.0492374	0.078579	0.239034	0.0411295	0.231796	0.104458	0.167606	0.0519039	0.103261	0.118079	0.0791318	0.117209	0.105085	0.236284	0.190479	0.0589533	0.187491
ENSG00000263743.1	0	0	0	0	0	0	0	0	0	0	0	0	0	0	0	0	0	0	0	0	0	0	0	0	0	0	0	0	0	0	0	0	0	0	0	0	0	0	0	0	0	0	0	0	0	0	0	0	0
ENSG00000229600.1	0	0	0	0	0	0	0	0	0	0	0	0	0	0	0	0	0	0	0	0	0	0	0	0	0	0	0	0	0	0	0	0	0	0	0	0	0	0	0	0	0	0	0	0	0	0	0.0387098	0	0
ENSG00000259511.1	0	0.0504018	0	0.0814344	0	0.0307716	0	0.0789579	0	0	0	0	0	0	0	0	0	0	0	0	0	0.0859137	0.0961968	0.0684899	0	0	0.0348812	0	0.0323629	0.0474006	0	0.0669232	0	0	0.141351	0.05067	0	0	0	0	0	0	0.0557072	0	0	0	0	0	0.0298042
ENSG00000064545.13	5.45567	6.20139	5.5361	4.70636	4.94198	3.09347	6.68976	7.81155	5.61227	7.48798	3.99713	3.05212	6.0766	7.94122	6.26397	6.69074	6.9989	5.58178	7.14835	7.19391	4.0369	6.91867	6.51051	5.21345	6.85688	8.47097	6.02118	6.60601	5.78334	6.19258	7.03739	7.7049	6.51932	7.19141	8.39845	6.83548	5.44334	7.43082	7.59973	28.3583	21.8242	27.0798	18.8934	16.9539	15.5284	23.346	24.4287	12.7312	15.4117
ENSG00000050748.16	6.70616	5.45419	5.26016	5.68583	5.9317	5.00689	5.63026	5.44692	6.9335	5.64492	6.18321	5.28315	5.16986	6.197	5.98772	5.8443	5.47866	5.92338	6.24987	6.1443	5.42679	5.6491	6.13496	6.72652	6.24749	5.04984	5.5745	5.2052	5.95649	6.08029	5.9813	6.09719	5.20534	6.09682	5.37177	5.88697	5.85847	7.13507	6.90934	3.54889	5.82222	5.25266	4.80216	7.85314	5.92986	4.88782	5.27231	3.5198	7.64955
ENSG00000179195.14	25.6733	27.5783	25.2657	27.5092	16.5462	45.7939	24.5668	26.8436	26.5044	21.6386	25.3638	23.2408	24.0031	19.3453	23.4558	24.7204	26.4077	26.6077	24.0052	23.7669	21.8144	27.6227	17.9213	29.996	27.2807	20.7778	28.6755	24.9603	24.4095	23.2201	24.5603	20.1632	22.4389	26.7827	20.1849	15.5574	24.7272	27.6276	27.2176	9.70323	23.3693	20.966	27.8549	39.232	31.723	25.2403	28.9721	22.5942	38.1026
ENSG00000253759.1	0.155418	0	0.0504442	0	0	0	0.304426	0	0.245387	0	0	0	0	0	0	0.124942	0.191916	0.210141	0.0796987	0.0795256	0	0.15311	0	0.122059	0	0	0.0621633	0.403694	0.0576752	0	0.32756	0	0.288273	0.0766769	0	0.0903012	0	0.0764472	0.0919964	0	0	0	0	0	0	0	0	0	0
ENSG00000110075.13	11.6413	12.6222	11.1124	14.4097	9.24299	11.4816	11.2566	12.1663	12.4207	11.3584	12.1594	11.9131	9.95709	10.5527	10.2436	10.6931	12.1665	12.3914	10.3611	12.3012	13.1581	12.1283	8.82883	11.8805	12.0846	11.5222	12.2668	10.3099	10.9534	11.5659	12.5786	11.1865	9.41288	12.9231	10.5483	10.4638	11.9448	13.4282	12.087	7.82234	14.9814	10.7542	12.8496	11.4176	8.629	11.0654	10.1765	10.5904	13.4128
ENSG00000126768.11	12.6996	14.2343	12.4153	8.31114	9.55744	15.9184	14.1234	12.3798	13.9634	17.0814	12.4533	11.199	20.5986	13.1974	12.2392	13.648	14.2277	13.1367	21.8453	13.1674	10.5801	12.8094	22.8863	13.82	13.3781	13.9329	11.4068	12.1494	11.6989	10.7278	12.8607	14.4293	17.7454	15.0924	13.5727	21.3071	12.3382	13.5516	16.6096	26.2537	38.3058	17.4984	15.1467	19.7432	48.4128	22.773	36.7325	14.364	16.7299
ENSG00000279659.1	0	0	0	0	0.186138	0.00928358	0	0.0476421	0.0276938	0	0	0.0089695	0.0169536	0.0314742	0.0116237	0	0	0.0177871	0.0134919	0.0942384	0.0143254	0.0388793	0.0580438	0	0.00998666	0.0692458	0.0315702	0	0.0292909	0.0715021	0.0138629	0.0403805	0.0122002	0.0259607	0.113719	0	0.0861528	0.0388244	0	0	0	0	0.0168065	0	0.0260382	0	0	0.0375625	0.0179834
ENSG00000260509.2	0	0.0191258	0.010741	0	0.0624331	0.0233537	0	0.0749049	0.0174166	0.0143384	0	0	0	0.019794	0	0	0.0136214	0.0111862	0.0339401	0	0.0180184	0	0.0365036	0.0129949	0.0125612	0.0580647	0	0.0107447	0.0122807	0.035974	0	0.0253952	0	0	0.0357587	0	0	0.0325554	0.0391772	0	0	0.0441605	0	0	0	0	0.0284951	0	0.0113097
ENSG00000278060.1	0	0	0	0	0	0	0	0	0	0	0	0	0	0	0	0	0.0378693	0	0	0	0.0500935	0	0	0	0.0349217	0.0403568	0	0	0	0	0	0	0	0	0	0	0	0	0	0	0	0	0	0.304669	0	0.102365	0.0792201	0	0
ENSG00000107937.17	4.33397	8.93727	4.63469	5.03287	3.29214	3.43728	4.71487	5.43406	5.16539	7.22486	4.87566	3.03063	4.37769	4.92325	3.84217	3.707	5.27505	4.56142	4.99543	5.13098	3.92006	4.66402	5.78375	5.25973	5.0261	4.58831	4.70274	4.5823	4.57063	4.821	4.90839	4.79985	3.50512	5.2492	5.76999	6.71929	4.81163	6.01899	4.90366	6.69383	14.9155	16.7731	18.5362	12.0751	8.08004	11.194	32.3117	10.2724	14.0468
ENSG00000105088.7	0.806518	1.21728	1.24294	0.633918	2.0607	0.939729	2.24179	1.09532	0.943596	1.3651	0.460031	0.658699	1.13287	2.19686	1.16122	1.23143	0.580354	0.770798	1.44605	1.26478	1.2321	1.33757	2.01609	1.16883	0.77304	2.55026	0.765852	1.01166	0.633043	1.42864	1.04557	2.16398	0.484299	0.833018	2.01257	0.981032	1.93796	1.29287	1.19522	0.970001	7.68527	11.7536	1.38989	0.86465	1.39538	0.929638	6.04034	10.6032	1.20763
ENSG00000226666.1	0.0786412	0.024791	0.05569	0.100137	0.0101158	0.0302712	0.0315078	0.0970921	0.135453	0.185855	0.036569	0.00731176	0.0414607	0.0256571	0.0379015	0.0775885	0.0706246	0.0652484	0.0109983	0.0329234	0.058389	0.0739518	0.011829	0.067376	0.0488456	0.00940797	0.0514708	0.0487457	0.063673	0.0349723	0.0678044	0	0.0596722	0.031744	0.0115877	0.0623074	0.011705	0.0316489	0.0126954	0.691941	0.16686	0.0286205	0.095902	0.284097	0.0636775	1.14544	0.147742	0.0408269	0.0219896
ENSG00000260259.1	0.321902	0.313945	0.11754	0.0563603	0.0284672	0.575015	0.354671	0.273231	0.349419	0.496872	0.283004	0.123458	0.350029	0.433217	0.159991	0.655036	0.347809	0.69367	0.123804	0.123535	0.230041	0.148651	0.0665773	0.30811	0.137459	0.264754	0.265552	0.215565	0.403167	0.0984171	0.15901	0.0926344	0.503779	0.446662	0.293484	0.736437	0.164698	0.356259	0.285814	0.17702	0.821743	1.53031	0.385546	0.199873	0.597326	0	1.793	0.488295	1.07262
ENSG00000277745.1	0	0	0	0	0	0	0	0	0	0	0	0	0	0	0	0	0	0	0	0	0	0	0	0	0	0	0	0	0	0	0	0	0	0	0	0	0	0	0	0	0	0	0	0	0	0	0	0	0
ENSG00000077063.9	0.587652	0.475482	0.453747	0.733581	1.0649	0.408158	0.554327	0.750476	0.97341	0.503872	0.319048	0.305779	0.717473	1.15068	0.541102	0.467445	0.661999	0.794564	0.694687	0.534919	0.734235	0.758696	0.723275	0.580538	0.732565	0.69463	0.88575	0.712992	0.686364	0.601829	0.426968	0.88293	0.453206	0.823991	0.73191	0.593023	0.82372	0.79718	0.889757	0.616841	1.59414	4.54003	2.25623	0.040969	1.83656	0.0275301	3.98946	0.0471004	3.49451
ENSG00000167741.9	76.7872	63.2382	76.596	56.6278	8.21384	48.1005	82.6303	77.7592	59.4198	67.9639	143.116	105.247	84.4519	56.439	81.0319	109.284	80.0523	79.3059	76.3433	60.3982	57.0956	71.7115	51.2368	88.4144	60.8985	70.7993	70.7242	71.5762	81.8897	38.4762	79.7117	24.6789	93.3181	92.8603	42.5302	61.6551	46.8979	68.9355	50.9313	39.6906	7.41701	0.771587	34.3846	6.20017	10.559	49.4143	25.3739	0.124479	20.9511
ENSG00000251169.2	8.91047	4.7711	7.06856	6.49731	0.648934	5.60383	8.95127	8.04372	7.07566	8.20967	7.64104	9.64914	13.9066	4.46751	7.98893	6.58909	7.41082	8.54423	12.9015	5.87355	5.26539	9.15896	8.65081	8.27398	9.90778	8.84601	8.19185	6.68812	6.76889	4.91433	7.97447	5.9127	11.9215	6.92378	3.92918	21.3558	5.72819	6.84503	8.65614	2.19061	5.12272	4.03927	10.7977	3.7752	6.03019	0.743556	13.4551	3.01194	3.72143
ENSG00000202269.1	0	0	0	0	0	0	0	0	0	0	0	0	0	0	0	0	0	0	0	0	0	0	0	0	0	0	0	0	0	0	0	0	0	0	0	0	0	0	0	0	0	0	0	0	0	0	0	0	0
ENSG00000148343.17	9.43263	9.77365	8.92466	9.76238	5.21427	13.5398	8.65647	6.43016	10.2703	6.33087	9.11587	9.39052	6.75446	7.40562	9.20092	8.23523	9.246	9.33432	6.14371	7.0773	11.2531	9.21432	3.9456	9.44164	7.1555	8.83863	9.1641	8.69684	11.9106	4.96553	9.87825	6.67682	9.9807	9.65482	5.16712	10.2148	6.1126	6.141	5.62022	7.85799	2.59882	6.69909	5.30639	4.91642	3.65614	4.60215	12.1534	3.79881	7.70518
ENSG00000167183.2	141.333	44.5225	80.5526	102.405	10.8232	157.432	121.784	106.035	116.655	162.272	197.22	203.352	142.181	95.7714	159.829	95.693	97.5323	171.522	127.327	104.475	84.7003	159.799	118.283	115.703	140.364	89.9396	89.0912	177.039	144.757	92.4783	167.055	89.2138	219.181	91.0795	78.6601	115.153	62.2896	75.1507	149.212	74.1927	191.372	63.6526	109.654	142.401	144.739	105.89	77.557	83.4786	60.2333
ENSG00000257120.1	0	0	0	0	0	0	0	0	0	0	0	0	0	0	0	0	0	0	0	0	0	0	0	0	0	0	0	0	0	0.0429272	0	0	0	0	0	0	0.0431025	0	0	0	0	0	0	0	0	0	0	0.0375852	0
ENSG00000214960.8	0.374771	0.665736	0.257458	0.457305	0.335087	0.187405	0.179017	0.505849	0.40295	0.310813	0.273437	0.199877	0.382239	0.280549	0.380915	0.335476	0.300949	0.310099	0.449213	0.487061	0.199048	0.346555	0.422274	0.314192	0.29847	0.414513	0.308994	0.288901	0.32764	0.389904	0.290749	0.449921	0.278267	0.370927	0.342851	0.529011	0.36138	0.315531	0.326632	0.10115	1.01959	0.607496	0.198273	0.182734	0.505147	0.214887	0.237572	0.128018	0.589328
ENSG00000258516.1	0	0	0	0	0	0	0	0	0	0	0	0	0	0	0	0	0	0	0	0	0	0	0	0	0	0	0	0	0	0	0	0	0	0	0	0	0	0	0	0	0	0	0	0	0	0	0	0	0
ENSG00000270472.2	4.93392	5.73157	8.7917	8.84588	0.139625	0.783421	14.6414	2.54626	8.25747	6.99046	3.28089	1.1606	2.47984	3.54138	6.27773	7.73451	17.4248	4.00269	3.18795	6.28631	3.06252	14.3632	3.18382	3.60364	9.77592	0.519422	6.39394	11.8225	4.99852	2.17221	15.5981	7.95112	5.49092	5.54995	3.03888	5.41807	1.45405	8.22717	4.90648	1.30236	1.43945	0	0.472753	0.490164	0.292974	0	0.127453	0.774843	0
ENSG00000189058.7	10.8413	18.7055	6.74395	3.18131	9.11801	3.21498	14.0837	19.7359	5.01422	13.6971	5.39518	8.38003	6.44553	16.0653	14.1413	6.48084	2.48667	6.71553	14.5859	10.5812	7.49545	6.97604	11.0119	3.7101	10.4506	42.7043	23.4902	5.81378	15.6713	7.42854	5.62532	18.8634	4.54651	2.02285	15.0571	10.4037	9.58843	6.70313	32.5358	1.51043	4.62301	0.634368	2.77093	1.18068	2.29352	0.396693	2.07225	0.72582	2.22712
ENSG00000164816.7	8.07668	0	1.35267	92.6748	2.60561	4440	1.23398	1.53563	0.612102	3.61142	10.8241	0	0.0624526	2.66668	4.1534	0.272702	6.1037	0.425899	0.795212	0	9.49881	21.5309	0.962183	1.71263	25.4207	139.573	0	1.66782	69.9913	0.263395	3.47257	4.76005	15.9995	0.0478163	61.7369	101.532	0.0528941	0.0953461	3.38481	10.2333	4.2414	0	0.557196	0	76.2549	0	0	0	2.5836
ENSG00000237314.2	0	0	0.0569531	0	0	0	0	0	0	0	0	0	0	0	0	0	0	0.029657	0	0	0	0	0	0	0.0333023	0	0	0	0	0	0	0	0	0	0.0474019	0	0	0.0431557	0	0	0	0	0	0	0	0	0.0377733	0	0
ENSG00000236312.3	0.327813	0.142093	0.478792	0.22958	0.11596	0.130127	0.240789	0.723446	0.388183	0.585889	0.1048	0.125725	0.158425	0.367643	0.488785	0.197649	0.455394	0.747961	0.378231	0	0.200799	0.726626	0.338999	0.289631	0.419948	0.161769	0.344181	0.558785	0.0912377	0.200448	0.453402	0.377341	0.342019	0.121297	0.332081	0.428548	0.335444	0.1814	0.0727655	1.44217	0.119547	0	0.3141	0.407086	0	2.05164	0.635103	0.117003	0.210061
ENSG00000253325.1	0.124335	0.359293	0.161421	0.348306	0	0.0438715	0.547966	1.06943	0.261746	0.323228	0	0.127162	0.400589	0.223107	0.21972	0.199907	0.818842	0.798537	0.446313	0.0636205	0.203094	1.77608	0.137149	0.195294	0.471941	0.0545393	0.994613	0.767019	0.230701	0.337899	2.29292	0.190827	1.03778	0.981465	0.604578	2.45619	0.339278	0.55042	0.735972	0.364662	0.604568	0	0.0794225	0	0.492197	0	0	0	0
ENSG00000186244.7	0	0	0	0	0	0	0	0	0	0	0	0	0	0	0	0.0470212	0	0	0	0	0	0	0	0	0.0444031	0	0	0	0	0	0	0	0	0	0.0632026	0	0	0	0	0	0	0	0	0	0.115772	0	0	0.0556705	0
ENSG00000226555.1	0	0	0	0	0	0	0	0	0	0.0149287	0	0	0	0	0	0	0	0	0	0	0	0	0	0	0	0	0	0.0111871	0	0	0	0	0	0	0	0.0200193	0	0	0	0	0	0	0	0	0	0	0	0	0
ENSG00000236162.1	0	0	0	0	0	0	0	0	0.0403218	0	0	0	0	0	0	0	0	0	0	0	0	0	0	0	0	0	0	0	0	0	0	0	0	0	0.0413932	0	0	0	0	0	0	0	0	0	0	0	0	0	0
ENSG00000251728.1	0.151101	0.785953	0.441386	1.26987	1.2828	0.639793	0.221977	1.43646	2.62428	0.392812	0.193225	0.309074	0.292096	0.271137	0.400532	0.364414	0	0.153228	0.232455	1.62365	1.97452	0.223286	0	0.534007	0.860309	0.198841	0.362619	0.58872	0.168219	0.246384	0.477691	0	0.420399	1.11821	0.73473	0.263378	0.24739	0.891884	0.536646	0	0.440831	4.83926	1.44781	0	0	0	1.95162	0.215723	0.929518
ENSG00000267677.1	0	0	0	0	0.0492203	0.0368226	0	0	0	0	0	0	0	0.06242	0	0	0	0	0.0535147	0	0	0.051404	0	0.040979	0	0	0.0834807	0	0.0387268	0.0567216	0	0.0800832	0	0	0.0563821	0	0.113906	0	0	0	0	0	0	0	0	0	0	0	0
ENSG00000231403.1	0	0	0	0	0	0.0490576	0	0.0314696	0	0	0	0.0710969	0	0	0	0	0	0	0	0.0355706	0.0378502	0	0	0	0	0	0	0	0	0	0	0	0	0	0	0	0.0379384	0	0	0	0	0	0	0	0	0	0	0	0
ENSG00000104341.15	33.517	36.2979	22.0989	25.8533	12.1788	27.4969	15.0842	24.2352	15.0512	32.0246	19.6346	13.9771	19.621	18.2131	26.8688	15.648	19.6378	16.7436	21.2965	16.1937	16.105	19.2497	26.8464	22.6311	19.7885	19.3157	17.4329	19.6537	21.1751	17.268	13.7632	21.4762	18.5696	18.5617	18.7458	21.3853	20.0277	13.2167	21.7707	39.5231	197.594	64.3196	27.311	126.754	44.576	51.0236	22.7851	20.8325	64.8622
ENSG00000256806.3	1.18954	0.515614	1.30305	1.38847	0.374029	1.18923	1.27422	1.42477	1.03037	0.858997	0.665505	1.03916	1.78851	1.24513	1.24813	1.07581	1.05066	1.1979	2.50352	0.951047	0.512746	1.4038	1.9272	1.34292	1.43921	1.34795	1.64542	0.885092	1.3151	0.821656	1.35799	0.988909	1.0917	1.58943	1.27197	1.41108	1.60945	1.36525	2.40574	0.581465	1.51831	2.05035	1.15561	4.34951	0.80935	3.39151	0.917572	2.01669	0.711431
ENSG00000248396.1	0	0	0	0	0	0	0	0	0	0	0	0	0	0	0	0	0	0	0	0	0	0	0	0	0	0	0	0	0	0	0	0	0	0	0	0	0	0	0	0	0	0	0	0	0	0	0	0	0
ENSG00000201628.1	0	0	0	0	0	0	0	0	0	0	0	0	0	0	0	0	0	0	0	0	0	0	0	0	0	0	0	0	0	0	0	0	0	0	0	0	0	0	0	0	0	0	0	0	0	0	0	0	0
ENSG00000253403.1	0	0	0	0	0	0	0	0	0	0	0	0	0	0	0	0	0	0	0	0	0	0	0	0	0	0	0	0	0	0	0	0	0	0	0	0	0	0	0	0	0	0	0	0	0	0	0	0	0
ENSG00000188763.4	0.210947	0.311961	0.126866	0.0869028	0.201913	0.16419	0.0455727	0.235928	0.097959	0.120969	0.0714058	0.031727	0.0719621	0.300593	0.189131	0.209484	0.137904	0.151	0.124082	0.0952403	0.101344	0.146693	0.0821253	0.138869	0.162495	0.122469	0.238231	0.175256	0.214124	0.111284	0.0980718	0.0857007	0.146726	0.229572	0.573202	0.183847	0.182844	0.146486	0.209333	0.491311	0.162908	0.7203	0.214013	0.123275	0.128944	0.0828377	0.288486	0.0265733	0.133583
ENSG00000197992.5	0.543837	0.273183	0.331581	0.242049	0.093491	0.242108	0.851197	0.220883	0.609885	0.15195	0.955429	0.202728	0.658291	0.647536	0.343554	0.116449	0.225942	0.402022	0.680259	0.249667	0.182647	0.368023	1.02598	0.981944	0.416711	0.100326	0.561081	0.490119	0.407405	0.157465	0.602554	0.397835	0.537356	0.293382	0.205951	0.310074	0.249644	0.427504	0.288819	0	0.133454	0.0203473	0.0292199	0.0504935	0.135811	0.0339304	0.0262587	0.0362814	0.0156331
ENSG00000229873.1	0.0868606	0.0753009	0.0211443	0.060832	0.215081	0.0919464	0.223306	0.176946	0.137143	0.112904	0.111076	0.111045	0.125934	0.0389658	0.0575615	0.0785564	0.0268146	0.132125	0.0668133	0.0333341	0.106411	0.128356	0.0718596	0.0767435	0.0494549	0.257184	0.104226	0.0634549	0.0241752	0.141634	0.102975	0.0999841	0.120833	0.1607	0.21118	0	0.142212	0.0961312	0.154246	0.191065	0.063353	2.08639	0.208068	0.215731	0.193416	0.144966	0.560945	0.403028	0.200375
ENSG00000233728.1	0	0	0	0	0	0	0	0	0	0	0	0	0	0	0	0	0	0	0	0	0	0	0	0	0	0	0	0	0	0	0	0	0	0	0	0	0	0	0	0	0	0	0	0	0	0	0	0	0
ENSG00000207654.3	0	0	0	0	0	0	0	0	0	0	0	0.267307	0	0	0	0	0	0	0	0	0	0	0	0	0	0	0	0	0	0	0	0	0	0	0	0.227787	0	0	0	0	0	0	0	0	0	0	0	0	0
ENSG00000273907.1	0	0	0	0	0	0	0	0	0	0	0	0	0	0	0	0	0	0	0	0	0	0	0	0	0	0	0	0.0169416	0	0	0	0	0.0241956	0	0	0	0	0	0	0	0	0	0	0	0	0	0	0	0
ENSG00000143476.16	1.97993	2.24083	2.0543	1.05805	0.221281	0.830846	2.27143	2.80913	1.39299	3.19492	3.6903	1.24032	1.76256	1.86376	1.19671	0.882423	1.61049	2.48357	1.84299	2.43689	1.37365	2.24122	2.58759	3.33353	2.87619	1.94149	1.72074	2.43153	2.15168	1.32314	2.39273	1.52165	1.46951	1.60716	2.24783	2.32476	1.78266	3.65317	1.90206	1.42794	3.79638	8.07986	8.32353	7.26991	3.49549	10.7553	4.98497	4.98779	5.80854
ENSG00000250919.1	0.00899301	0.0155924	0.0175132	0	0	0	0	0.0244265	0.0141989	0	0	0	0	0	0	0.0108443	0	0.00911959	0	0	0	0	0	0	0	0	0	0	0.0100118	0	0.0142152	0.0207035	0	0.0133103	0	0	0	0	0	0	0	0	0	0	0	0.120071	0.209076	0	0.0184405
ENSG00000067646.10	0	2.01586	2.16197	2.73503	2.12044	0	0.00771116	2.52354	2.71005	2.13215	0	0.00805259	0	2.49601	0.00347848	1.65836	2.1422	2.5896	3.02818	2.41728	0.004287	0.0155133	3.12227	0.00309177	0.00298859	0.00690746	0	0	0.00292185	2.76885	1.87101	0.0060421	0	0	0.00850782	3.96168	2.58249	2.89689	0	0.138554	0	3.4042	2.1325	1.48619	0	0.00876038	2.06101	0.00374696	0.00269084
ENSG00000145623.11	2.25856	4.29108	2.04167	2.40733	4.40023	1.13654	2.37931	7.83441	2.06234	3.73736	1.76343	1.20976	1.21171	3.10579	1.68833	1.55316	2.16224	1.49477	1.1696	4.94447	1.50607	2.25888	6.38669	1.16955	2.02387	3.02004	2.49658	2.20389	1.63427	3.58058	1.57251	3.95206	0.902914	1.66992	6.16132	1.25118	2.78412	2.75397	2.31594	1.69013	2.43631	2.05604	2.9681	1.7878	2.94159	1.89652	0.592831	3.39769	0.937033
ENSG00000234714.1	0.0508973	0	0	0	0	0	0	0	0	0	0	0	0	0	0	0	0	0	0	0	0	0	0	0	0	0	0	0	0	0	0	0	0	0	0	0	0	0	0	0	0	0	0	0	0	0	0	0	0
ENSG00000153094.20	7.27247	5.25826	7.1725	11.0164	1.31016	5.95014	10.1652	5.81117	10.8425	5.70067	9.92675	12.4335	6.58704	5.79381	8.87932	7.34565	7.32306	9.60849	4.27677	6.04337	12.2208	7.01852	3.76707	7.54059	8.75764	4.46398	9.3329	9.23773	7.99449	6.01803	6.65353	3.5712	6.96177	8.67423	4.0963	3.25073	5.26854	9.43269	6.51132	3.83393	3.62941	4.37844	3.17726	4.32888	3.82935	3.9561	4.15908	4.93941	4.3022
ENSG00000164418.18	0.110145	0.194383	0.0823522	0.115709	0.222643	0.566315	0.156031	0.208352	0.111797	0.0869247	0.0301824	0.0784524	0.0532308	0.218821	0.14077	0.109102	0.0704343	0.0897553	0.142215	0.075482	0.102809	0.0813821	0.244079	0.0810967	0.0851094	0.209653	0.184088	0.0862126	0.157659	0.237331	0.0590718	0.407529	0.0574592	0.0815115	0.216783	0.089138	0.180335	0.0812672	0.0558839	0.017306	0.0229531	0.0393702	0.00753841	0.0390802	0.0759151	0.0131305	0.0279445	0.0645854	0.024199
ENSG00000159445.11	1.28536	2.87025	1.49609	2.11972	2.09456	2.08465	1.9174	2.31553	2.45723	2.28493	1.71975	1.05099	2.38255	2.12265	1.66855	2.20342	1.87282	2.1646	3.32955	2.50062	1.59221	2.31444	3.01791	2.40169	1.62922	2.29152	1.93485	1.59638	1.54869	2.0959	2.35559	2.34295	1.52608	2.61156	2.28151	3.35205	2.71577	2.50134	2.88689	1.192	2.51605	4.43139	3.34334	4.92397	0.97122	2.73527	5.71029	2.35399	5.32218
ENSG00000248843.1	0	0	0	0	0.0261131	0.0195357	0	0	0	0	0	0	0	0	0	0	0	0	0	0	0	0	0.0305358	0	0	0	0	0	0	0	0	0	0	0	0	0	0	0	0	0	0	0	0.0353663	0	0	0	0	0	0
ENSGR0000185960.11	0	0	0	0	0	0	0	0	0	0	0	0	0	0	0	0	0	0	0	0	0	0	0	0	0	0	0	0	0	0	0	0	0	0	0	0	0	0	0	0	0	0	0	0	0	0	0	0	0
ENSG00000240057.4	0.0289825	0.100501	0.056441	0	0.123026	0.0383493	0.106443	0.0590409	0.0457598	0.0659265	0.0648588	0.0222311	0.0980463	0.0780094	0.0480158	0.0873721	0.0894714	0.102866	0.10032	0.0444899	0.0236706	0.0642421	0.0479543	0.0597491	0.0330029	0.0286045	0.052165	0.0564607	0.0483988	0.0827025	0.125985	0.0667227	0.0100795	0.010724	0.0234879	0.0631477	0.142354	0.0534596	0.141533	0.127504	0.0634163	0.261059	0.0416552	0	0.0645363	0.0725554	0.0374337	0.0517219	0.052001
ENSG00000223751.1	0	0	0.0264007	0	0.498735	0	0	0	0	0	0	0	0	0.19461	0	0	0	0	0	0.0416209	0	0	0	0	0	0	0.0325341	0	0	0.0884221	0	0.12484	0	0	0	0.0472604	0	0	0	0.477128	0	0	0	0	0	0	0.105059	0	0
ENSG00000254269.4	0	0	0	0	0	0	0	0	0	0	0	0	0	0	0	0	0	0.0180711	0	0	0	0	0	0	0	0.0234506	0	0	0	0	0	0	0	0	0	0	0	0	0	0	0	0	0	0	0	0	0	0	0
ENSG00000269742.1	0	0.0440464	0	0	0	0.0268915	0	0	0	0	0	0	0	0	0	0	0.0313698	0	0	0	0	0	0	0	0.0289281	0.0334304	0	0	0	0	0	0	0.07068	0.0375999	0	0	0	0	0	0	0	0	0	0	0.150848	0	0.0328118	0	0
ENSG00000199687.1	0	0	0	0	0	0	0.147985	0	0	0	0	0	0	0	0	0	0.12439	0	0	0	0	0	0	0	0	0	0	0	0	0	0	0	0	0	0	0	0	0	0	0	0.293887	0	0	0	0	0	0	0	0
ENSG00000232268.5	0	0	0	0	0	0	0	0	0.0218122	0.0179571	0	0	0	0	0	0	0	0.0140094	0	0	0.0225659	0	0.0228582	0.0162745	0	0.0181798	0	0	0	0	0	0	0.0192182	0	0	0	0	0	0	0	0	0	0	0	0	0	0	0	0.0141641
ENSG00000224252.1	0	0	0	0	0	0	0	0	0	0	0	0	0	0	0	0	0	0	0	0	0	0	0	0	0	0	0	0	0	0	0	0	0	0	0	0	0	0	0	0	0	0	0	0	0	0	0	0	0
ENSG00000275993.2	0.25957	1.61181	0.793504	2.87477	0.392902	0.252403	0.407928	1.01246	2.04915	1.3692	0.181405	0.243864	0.180874	1.3215	0.0600048	2.1328	1.12929	0.223434	0.102152	0.328957	0.443712	0.209627	0.464441	3.43116	0.21309	1.1439	0.930768	0.39983	0.262095	0.615192	0.338737	0.208456	0.780965	14.4024	0.347338	0.436662	3.14287	0.855139	0.0696769	0.0796702	0	0.966643	0.803975	0.569717	0.851308	0.715298	0.518483	1.05142	1.46062
ENSG00000162433.13	3.1163	4.22162	2.29069	4.71885	9.75866	3.05156	2.11467	4.81451	3.30939	2.99072	3.0451	1.98512	3.51533	5.15911	6.84234	4.48492	4.26649	3.62992	4.44958	6.77007	2.71086	3.16808	5.64713	3.6666	6.23183	5.69539	6.21305	4.64264	5.75595	7.47854	2.35101	6.60138	2.79334	2.71132	5.48536	3.64017	5.37795	3.29919	8.18863	2.35793	9.09166	8.29149	7.81701	0.209183	4.8023	62.6861	0.600784	0.60669	6.8513
ENSG00000249014.2	0.266509	0.72613	0.370718	0.213311	0.107742	0.0403019	0.44745	0.77559	0.180337	0.54437	0.340807	0.350446	0.80959	0	0.403686	0.505015	0.235068	0.540521	0.644284	0.116888	0.186569	0.450088	0.692946	0.627914	0.390188	0.551119	0.31979	0.593356	0.551018	0.124162	0.661997	0.26295	0.423709	0.338103	0.555386	0.729994	0.436342	0.67418	0.743698	0	0	0.304835	0.583682	0	0	0.254166	0.147524	0.217422	0.429384
ENSG00000141337.11	0.77957	0.813277	0.956349	1.14128	0.75718	0.349667	1.14524	0.855351	1.28648	0.715614	0.678679	0.686935	0.744985	0.778463	0.735515	0.756822	1.09861	0.879869	0.870672	0.953293	0.794964	0.904669	0.601212	0.892417	0.74979	0.794037	0.969774	0.746469	0.809047	0.707397	0.873725	0.937911	0.830203	1.02019	0.924463	0.721642	0.926615	0.952137	0.762563	0.968815	0.443307	1.1549	0.544394	1.05013	1.17688	0.565999	0.304342	0.493606	0.521557
ENSG00000229117.7	181.415	174.713	220.148	153.28	161.275	138.703	170.772	179.998	211.851	231.251	151.125	125.148	326.65	176.343	198.299	195.208	214.864	213.564	387.857	152.575	103.815	221.9	560.188	180.51	227.577	164.711	214.1	193.732	171.51	132.265	187.248	251.074	259.083	159.048	223.941	430.415	174.563	276.182	300.869	150.741	172.935	204.209	352.967	151.261	248.468	275.826	211.378	179.247	247.279
ENSG00000275374.1	0.0194186	0	0	0	0	0	0	0.0263721	0	0	0	0	0.0375385	0	0	0.0234162	0.0479576	0.019692	0.089621	0	0	0	0.03213	0.0228758	0	0	0.0233008	0.0378294	0.0864742	0.0316639	0.030695	0	0.0270136	0	0	0	0	0.0286549	0	0	0	0	0	0	0.0576536	0.129635	0	0.0277235	0
ENSG00000262090.1	0	0	0	0	0	0	0	0	0	0	0	0	0	0	0	0	0	0	0	0	0	0	0	0	0	0	0	0	0	0	0	0	0	0	0	0	0	0	0	0	0	0	0	0	0	0	0	0	0
ENSG00000065325.11	2.34412	2.06124	1.19492	1.71889	1.56684	2.26317	1.27464	1.91727	3.33022	1.14339	1.25054	1.70859	1.91359	1.36769	1.21669	1.82087	1.73143	2.10489	1.86209	1.35399	1.41727	2.35181	2.27638	1.21696	1.83957	3.57047	2.30945	2.00313	1.67041	1.4656	1.78448	4.61853	1.43041	1.69926	2.07065	1.60429	3.16686	2.01956	2.46439	0	0.0559416	0.0767628	0.0229659	0.14287	0.213486	0	0.012383	0.0376411	0.0712651
ENSG00000115307.15	44.4534	56.2878	50.9475	48.9974	19.1378	55.4799	50.3377	50.656	61.6915	64.1957	47.4586	46.4386	68.421	51.4752	45.6552	47.7474	57.6059	48.2232	72.0726	50.5196	44.6718	46.6144	56.9776	51.9978	47.0642	54.1283	49.2633	53.4381	52.2607	40.984	56.3045	39.1507	65.8925	59.4284	39.0338	99.7742	43.0358	53.7974	65.1407	62.1199	89.9255	73.4597	87.4673	63.191	94.1135	87.8484	59.6138	68.7248	45.6275
ENSG00000171561.3	0	0	0	0	0	0.0147361	0.0204509	0	0.0219797	0	0	0	0	0	0	0	0	0	0	0	0	0	0	0	0	0	0	0	0	0	0	0	0	0	0	0	0	0	0	0	0	0	0	0	0	0	0	0	0
ENSG00000254705.1	0	0	0	0	0	0	0	0	0	0	0	0	0	0	0	0	0	0	0	0	0	0	0	0	0	0	0	0	0	0	0	0	0	0	0	0	0	0	0	0	0	0	0	0	0	0	0	0	0
ENSG00000176922.3	0	0	0	0	0	0	0	0	0	0	0	0	0	0	0	0	0	0	0	0	0	0	0	0	0	0	0	0	0	0	0	0	0	0	0	0	0	0	0	0	0	0	0	0	0	0	0	0	0
ENSG00000246067.6	1.61838	1.70845	1.56421	1.90715	1.23369	2.48437	1.64934	1.37876	2.14979	1.48263	1.77172	0.94669	1.0159	1.35021	1.03686	1.33944	1.90257	1.50187	2.04874	1.46676	1.73634	1.3149	1.77859	1.92761	1.48927	2.31831	1.55498	1.09358	1.82167	1.55803	1.48204	1.55356	0.988603	1.21976	2.05204	2.14433	2.3857	1.14561	1.16653	0.630539	1.70743	4.94883	2.33461	2.25447	1.11702	1.65449	3.30128	0.878169	2.81037
ENSG00000170871.10	8.14293	13.6776	7.04473	9.59116	9.62126	6.39929	7.93319	7.19018	9.10291	6.73979	8.03621	9.23927	5.03152	5.97515	5.93347	8.67288	9.61048	6.38658	5.36689	7.70273	11.6394	5.78069	7.05998	8.17718	6.52438	7.59822	6.37329	6.69807	6.51929	11.992	8.87868	8.25143	4.40432	9.13952	7.17319	5.85476	7.68176	8.21301	5.56763	1.62186	3.58018	6.12893	5.12195	4.59505	4.61634	3.17322	3.5227	5.74328	6.47983
ENSG00000134146.10	0.493614	0.538266	0.485171	0.59573	0.452448	0.402567	0.358014	0.478534	0.627407	0.605297	0.444635	0.325446	0.618138	0.442871	0.512269	0.421153	0.471524	0.620192	0.709229	0.557573	0.504564	0.472521	0.929738	0.532121	0.563855	0.45143	0.542008	0.583618	0.466586	0.521402	0.512809	0.807619	0.507448	0.418133	0.457899	1.07685	0.543861	0.53828	0.738728	0.355101	2.08316	0.292064	0.764479	0.925254	1.05076	1.28495	1.39539	0.890872	0.880083
ENSG00000276845.1	0	0	0	0	0	0.140229	0	0.0899543	0	0	0	0	0	0	0	0	0	0	0	0	0	0	0	0	0	0	0	0.0645173	0	0	0	0	0.0921422	0	0	0	0	0	0.117621	0	0	0	0.126931	0	0	0	0.0855504	0	0.06791
ENSG00000213307.4	0.0821078	0.0474537	0.106599	0.153342	0	0.0289718	0.0804143	0.0743396	0.0864257	0.0355755	0.139997	0.0279916	0	0	0.0725492	0.0330036	0.10139	0.0277545	0	0.0420135	0	0.0404443	0.135855	0	0.0623319	0.0720331	0.032841	0.0799771	0.0304699	0	0.0432626	0.0630089	0.0380738	0	0.0887221	0	0.0448103	0.0403872	0	0.240814	0.159697	0.109568	0.104898	0	0.0812589	0.182712	0	0.0781488	0
ENSG00000239661.1	0	0	0	0	0	0	0	0	0	0	0	0	0	0	0	0	0	0	0	0	0	0	0	0	0	0	0	0	0	0	0	0	0	0	0	0	0	0	0	0	0	0	0	0	0	0	0	0	0
ENSG00000216060.1	0	0	0	0	0	0	0	0	0	0	0	0	0	0	0	0	0	0	0	0	0	0	0	0	0	0	0	0	0	0	0	0	0	0	0	0	0	0	0	0	0	0	0	0	0	0	0	0	0
ENSG00000248613.1	0	0	0	0	0	0	0	0	0	0	0	0	0	0	0	0	0.068893	0	0	0	0	0	0	0	0	0	0	0	0	0	0	0.128441	0	0	0	0	0	0	0.0990731	0	0	0	0	0	0	0	0	0	0
ENSG00000231884.1	0.0805873	0.139725	0.156937	0	0.114027	0.255917	0.236776	0.218889	0.254476	0.10475	0.103053	0	0.623139	0	0.106809	0.388709	0.298536	0.653773	0.247952	0.123707	0.131635	0.238172	0.400019	0.0949346	0.0917663	0.106049	0	0.313984	0.089717	0	0.382153	0.927631	0	0.119275	0	0.561874	0.263883	0.118918	0	0.709065	0.94044	0.322617	0.308865	4.00301	0	5.91783	0	0	0.165248
ENSG00000260139.5	0.00602147	0.125283	0.00586317	0	0.149101	0.0286831	0.0574984	0.110398	0.0190144	0.0117403	0.0192503	0.00615839	0.0116402	0	0.0239421	0.0326748	0.00371776	0.0457967	0.0231586	0.041595	0.0147536	0.0489394	0.0398524	0.00354675	0.0102851	0.130745	0.0361264	0.0205282	0.0234627	0.0981856	0.0285544	0.0207937	0.029318	0.040105	0.136637	0.0157437	0.00985864	0.0444276	0.0320785	0	0.026351	0.0602647	0.0230784	0	0.0357553	0.0301486	0.0155546	0.0300884	0.00308682
ENSG00000169019.10	9.72524	11.0087	8.88571	15.8539	6.02032	8.18182	10.7756	9.09145	9.36343	12.2141	11.9848	8.80388	17.6091	9.78672	10.0373	10.5981	9.39222	12.0111	19.8137	9.4314	10.5054	9.90449	21.813	9.91814	10.5412	9.22011	8.22977	10.2169	10.9825	7.74144	11.3218	12.8776	8.77552	9.26375	8.64035	35.8505	10.7585	11.6844	12.8066	1.58998	15.9358	6.54368	12.624	10.7714	11.3155	10.2814	9.91944	6.41453	17.6008
ENSG00000260727.1	0.270125	0.936703	0.210419	0.151344	0.267549	0.142971	0.674612	0.183426	0.597094	0.105335	0.172715	0.193387	0.574402	0.145414	0.143207	0.260587	0.33356	0.438284	0.207781	0.207329	0.176493	0.718507	0.357558	0.318217	0.338356	0.426565	0.162064	0.131558	0.120291	0.132139	0.597781	0.0621875	0.263043	0.239883	0.218914	0.376675	0.132679	0.199304	0.57562	4.75351	2.67946	0.648839	0.983538	2.41522	0.801997	1.71314	1.39557	0.539911	0.304646
ENSG00000225448.1	0	0	0	0	0	0	0	0	0	0	0	0	0	0	0	0	0	0	0	0	0	0	0	0	0	0	0	0	0	0	0	0	0	0	0	0	0	0	0	0	0	0	0	0	0	0	0	0	0
ENSG00000068912.12	26.6834	24.9176	23.5243	31.198	18.4185	18.2934	25.2314	27.9463	35.6354	40.9034	22.3283	19.6949	40.8394	23.3579	24.7291	24.7464	25.5483	24.9818	41.661	22.6022	16.7194	25.5704	52.4747	28.5463	26.1789	16.85	25.0476	26.209	24.3669	19.3731	28.6615	29.4909	21.0355	23.5237	31.412	52.2855	24.9223	34.61	38.3801	10.4882	34.1726	17.2286	27.0257	43.6439	33.8789	25.218	15.8443	24.5685	22.3945
ENSG00000237426.1	0	0	0	0	0	0	0	0	0	0	0	0	0	0	0	0	0	0	0.0152952	0	0	0	0	0	0	0	0	0	0	0	0	0	0	0	0	0	0	0	0	0	0	0	0	0	0	0	0	0	0
ENSG00000249958.1	0	0	0	0	0	0.0105606	0	0.0270976	0	0	0	0	0	0	0	0	0	0.0101168	0	0	0	0	0	0.0117526	0	0	0	0	0.0111066	0	0	0	0	0	0	0	0	0	0	0	0	0	0	0	0	0	0.025771	0	0.0102285
ENSG00000264445.1	0	0	0	0	0	0	0	0	0	0	0	0	0	0	0	0	0	0	0	0	0	0	0	0	0	0	0.204773	0	0	0	0	0	0	0	0	0	0	0	0	0	0	0	0	0	0	0	0	0	0
ENSG00000253884.1	0	0	0	0	0	0	0	0	0.126535	0	0	0	0	0	0	0	0	0	0	0	0	0	0	0	0	0	0	0	0	0	0	0	0	0	0	0	0	0	0	0	0	0	0	0	0	0	0	0	0
ENSG00000211637.2	172.061	195.802	112.422	175.927	3.57593	32.6524	432.757	78.4238	132.825	217.575	82.0345	26.874	85.7299	151.764	103.653	254.113	245.811	70.8462	114.774	70.6279	146.916	260.039	108.32	112.073	245.956	24.419	203.634	171.878	276.5	63.0556	330.53	72.6873	206.415	133.941	28.0004	156.654	25.79	204.09	61.8462	195.864	10.9082	0.138594	18.6425	25.4511	88.1902	6.35567	3.13004	4.84374	0.177474
ENSG00000217862.2	0.218954	0.37963	0.0532995	0	0.0774523	0.173831	0.482486	0.446038	0.259277	0.0711509	0.0699986	0.279916	0.317448	0.196446	0.0725492	0.264029	0.473152	0.388563	0.25263	0.168054	0	0.323554	0.0905702	0.193452	0.373991	0.0720331	0.131364	0.0533181	0.304699	0	0.346101	0.378053	0.380738	0.405086	0.266166	0	0	0.0807744	0.194408	0	0.159697	0	0	0	0.162518	0	0.212101	0.156298	0
ENSG00000261649.4	0	0	0.00534003	0	0.00775987	0	0	0.022344	0.0173178	0	0	0	0	0.00984088	0	0	0	0	0	0.0168372	0	0	0	0	0	0	0	0.00534189	0	0.0089425	0	0.0378768	0	0.00811703	0.0266669	0.00955929	0.017958	0	0	0.144762	0	0	0.0105096	0	0	0	0	0	0
ENSG00000253227.1	0	0.0454801	0.0255414	0.220447	0	0.111067	0.0385349	0	0.0414156	0.0340958	0.0335436	0.187792	0.101415	0.282414	0.0347659	0.0316309	0.0971727	0.0532003	0	0.161065	0.385621	0.0387621	0	0.339911	0.0597394	0	0.0944252	0.0255503	0.0292026	0.128316	0.207316	0	0.0364903	0.970594	0	0.502943	0.0858932	0.15483	0	0	1.91319	0.210022	0.0502674	0	0.0778792	0	0.271039	0	0.134469
ENSG00000279137.1	0.00750037	0	0.00730319	0	0	0.00793953	0	0	0.0118422	0	0	0	0	0.0134587	0	0.00904441	0.0185234	0	0.0346158	0	0.0122514	0.0110835	0.0124101	0	0	0.0098701	0.0179997	0	0.0250503	0.01223	0	0.0518015	0.0104339	0.0111011	0	0.0130736	0.0491199	0	0	0	0.021882	0	0	0	0	0	0.0193749	0	0
ENSG00000021852.11	0	0	0	0	0.00752102	0.0281331	0	0	0	0.00690912	0	0.212014	0	0	0	0	0	0	0	0	0	0	0.00879484	0	0	0	0	0	0	0	0	0	0	0	0	0	0	0	0	0	0.0155074	0	0	0	0.0157813	0.0177423	0	0	0.0163492
ENSG00000259402.1	0.0275774	0	0	0	0.0390207	0.0291921	0	0	0	0	0.0352655	0	0	0	0	0	0	0	0	0.042333	0.135138	0.0407518	0	0.0324871	0	0.108871	0.0330907	0.0268618	0.0307016	0	0	0	0	0	0	0	0	0	0.0489715	0	0	0	0.0528477	0	0.0818768	0.184101	0	0	0.0282743
ENSG00000200170.1	0.718105	1.49409	2.37737	2.414	0.406433	1.82436	1.05494	0.780198	2.72113	0.186683	1.46928	1.61575	1.66582	1.03086	0.951759	0.692748	0.709393	0.436928	0.883788	1.76374	3.98814	0.424465	0.237635	0.338381	0.81772	2.26797	0.689335	1.39894	0.95935	1.40512	2.04319	0	0.998967	0.637709	0.465571	0.50068	0.470286	1.05966	0.765119	0	0.419008	1.14992	0.550453	0	1.70563	0	2.59701	0.410088	1.61975
ENSG00000223872.1	0	0	0	0	0	0	0	0.0360806	0	0.0345329	0	0	0	0	0.0352116	0	0.0656123	0.0269412	0	0	0	0	0	0	0	0	0	0	0	0	0	0	0	0	0	0	0	0	0.0471777	0	0	0	0	0	0	0	0	0	0
ENSG00000271761.1	0.0268624	0	0	0.0752514	0	0	0	0.0364815	0	0	0	0	0	0.0964042	0	0	0	0	0.0826505	0.082471	0.175513	0	0	0	0	0	0	0	0	0.0438017	0	0.061842	0.0373688	0	0.0435395	0	0.0439805	0	0	0	0	0	0.0514776	0	0	0.179328	0	0	0.110165
ENSG00000070882.11	1.49355	1.31031	1.53624	2.06189	0.36742	1.11656	1.8942	1.98702	2.14891	1.87153	1.44733	0.677673	1.30167	1.2404	0.989759	0.963134	1.70276	1.64351	1.22323	1.80886	1.26662	2.34467	1.00449	1.49786	1.67423	1.44226	1.37097	1.57167	1.44345	1.0308	2.50523	1.16675	1.12854	1.4207	2.04055	1.62319	0.853221	2.35457	1.53282	1.81205	7.63324	6.51686	5.8856	4.50116	7.79995	3.6583	5.5744	8.14316	4.95008
ENSG00000238205.2	0	0	0	0	0	0.104102	0.0722366	0	0.0776366	0	0	0	0	0	0	0.0592946	0.0607192	0.049864	0	0	0	0.0726626	0	0.0579262	0	0	0	0.143688	0.0547426	0	0.077726	0.113202	0.0684039	0.0727781	0	0	0	0	0	0	0	0	0.18846	0	0	0	0.127021	0	0.100829
ENSG00000264017.2	0.0488408	0.0846818	0.0475568	0.273641	0.207322	0.413604	0.215251	0.0663299	0.385569	0.12697	0	0.149854	0.0944149	0.0876402	0.129465	0.117791	0	0.0990565	0.150274	0.0749737	0.0797786	0.21652	0.161624	0.115072	0.111232	0	0.11721	0.0951467	0.054374	0.477836	0	0.11244	0.135886	0.144576	0.237488	0	0.0799645	0.144143	0.0867306	0	0	0.195525	0.0935955	0	0	0	0.126165	0.139458	0
ENSG00000215568.6	0	0	0	0	0	0	0	0	0	0	0	0	0	0	0	0	0	0	0	0	0	0	0	0	0	0	0	0	0	0	0	0	0	0	0	0	0	0	0	0	0	0	0	0	0	0	0	0	0
ENSG00000231227.1	0	0	0.0307051	0	0	0	0	0	0	0	0	0	0	0	0	0	0	0	0	0	0	0	0	0	0	0	0	0	0	0	0	0	0	0	0	0	0	0	0	0	0	0	0	0	0	0	0	0	0
ENSG00000241119.1	0.0720483	0.13533	0.0526156	0.151375	0.0509724	0.0508445	0.061742	0.154925	0.0473982	0.140476	0.0537448	0.0798271	0.0464259	0.129284	0.0795759	0.0434401	0.0741398	0.103505	0.0184732	0.138248	0.215759	0.106468	0.0198685	0.0282918	0.123064	0.0632078	0.158496	0.0584822	0.0735264	0.107691	0.0759244	0.0276446	0.0668183	0.168842	0.019463	0.0523268	0.0393203	0.106317	0.0106618	0	0	0.024036	0	0	0.0534775	0	0.069793	0	0.0369345
ENSG00000228162.1	0	0.0895035	0	0	0	0	0	0	0	0	0	0	0	0	0	0	0	0	0	0	0	0	0	0	0	0	0	0	0.028735	0	0	0	0	0	0	0	0	0	0	0	0	0	0	0	0.0766321	0	0	0	0
ENSG00000225981.1	0	0.202012	0.0567244	0.244794	0.247288	0.555002	0.128372	0.197791	0.0919791	0.227169	0.186241	0.148951	0.394154	0.313604	0	0.140497	0.287746	0.0295379	0.134432	0.0894264	0.0951576	0.215215	0.48195	0.0686274	0.0663371	0.536632	0.0699025	0.113488	0.129711	0.332471	0.414383	0.134115	0.243122	0.301781	0.188846	0.0507717	0.0953794	0.0859647	0.10345	0	0.0849795	0.349826	0.390733	0	0.0864804	0.291678	0.376216	0.124756	0.0597281
ENSG00000276940.1	0	0	0	0	0	0	0	0	0	0	0	0	0	0	0	0	0	0	0	0	0	0	0	0	0	0	0	0	0	0	0	0	0	0	0	0	0	0	0	0	0	0	0	0	0	0	0	0	0
ENSG00000140691.15	1.9463	3.75103	2.21354	1.64155	1.62496	2.01872	3.0783	2.9026	2.82516	2.34625	1.80646	1.83271	1.74973	2.5724	1.95549	2.6435	3.53398	2.07981	1.78284	2.39739	2.14509	2.33103	1.00419	2.79513	1.85883	2.78844	2.33227	2.1608	1.78237	2.00911	1.96004	2.11389	2.23444	3.17881	2.12853	1.88778	1.82458	2.36635	1.99754	6.4679	3.50312	4.45089	3.30366	3.56048	3.58829	3.51897	5.01755	2.2857	3.61012
ENSG00000118729.11	3.45748	2.3343	0.790638	2.97907	108.05	9.53244	1.23134	2.89559	1.37301	6.7276	1.88913	1.85913	0.982304	18.1988	4.38806	11.9834	0.433411	0.690605	14.7965	14.5553	1.64294	1.02184	34.8792	3.93109	0.835143	5.82521	3.21839	1.28587	3.01519	21.936	0.298104	49.0971	0.641302	2.00817	15.5639	5.97181	34.4191	0.888985	5.83275	0.322651	0.198684	0.398465	0.250974	0.0520435	0.0777667	0.314747	0.0338309	0.134623	0.042968
ENSG00000204767.3	0.0193474	0.0167726	0.00470969	0.0270995	0.0479073	0.0102401	0.0142113	0.0328443	0.00763681	0.0125742	0	0.00494683	0	0.00867927	0.0320532	0.00583258	0.0119454	0.00490493	0	0.0222746	0.0158014	0.0142951	0.0240091	0.00569798	0.0110156	0.0509203	0	0.00471133	0	0.0157739	0.0152912	0.0334058	0	0.0214767	0.0391986	0.00843092	0.0395956	0.00713745	0.0171784	0	0	0.0968174	0.0648833	0.0480521	0.0143605	0	0	0.0759599	0.00991816
ENSG00000243709.1	20.1592	33.9685	25.6494	42.6127	2.63752	0.381643	24.1609	73.7786	56.8149	21.3377	20.4821	6.11153	100.257	24.4599	24.6953	65.4998	31.8649	22.8466	52.5261	65.2825	19.8225	41.1819	36.5538	42.2371	45.0728	49.0191	46.225	47.9694	31.7174	25.2039	28.8706	24.6884	26.1123	58.6524	30.8097	43.696	13.5765	52.8395	140.033	5.66952	2.90935	2.94808	31.2524	1.37173	29.7439	0	0.624188	0.251886	137.476
ENSG00000219384.1	0	0	0	0	0	0	0	0	0	0	0	0	0	0	0.0299463	0	0	0	0	0	0.0369069	0	0	0	0	0	0	0	0	0	0	0	0	0	0	0	0	0	0	0	0	0	0	0	0	0	0	0	0
ENSG00000264283.1	0	0.264742	0	0	0	0	0	0	0	0	0	0	0	0	0	0	0	0	0	0	0.249413	0	0	0	0	0	0	0	0	0	0	0	0	0	0	0	0	0	0	0	0	0	0.292609	0	0	0	0	0	0
ENSG00000274478.1	0	0.0694765	0	0	0	0	0.0294334	0	0	0	0	0	0	0	0	0.0241601	0	0	0	0	0	0	0.0331507	0	0	0.0263657	0	0	0	0	0	0	0	0	0	0	0	0	0	0	0	0.0802087	0	0	0	0	0	0	0
ENSG00000255415.1	0	0	0	0	0	0	0	0	0	0	0	0	0	0	0	0	0	0	0	0	0	0	0	0	0	0	0	0	0	0	0	0	0	0	0	0	0	0	0	0	0	0	0	0	0	0	0	0	0
ENSG00000185298.11	6.86422	8.63239	6.89343	5.89969	4.50328	5.69838	8.48689	7.03979	6.70002	8.50591	7.81072	6.20923	7.09661	6.76644	6.44564	6.84603	8.58643	7.14724	7.25541	7.5702	6.88866	8.01696	6.41304	6.23021	5.50797	8.83944	6.7997	6.43543	7.41968	6.5084	7.33036	6.22675	6.78726	8.36395	8.70822	7.08547	5.88147	8.21489	6.92938	15.85	15.9504	17.2195	20.7327	12.2612	11.4763	15.339	16.9176	13.1365	7.6246
ENSG00000165762.2	0	0	0	0	0	0	0	0	0	0	0	0	0	0	0	0	0	0	0	0	0	0	0	0	0	0	0	0	0	0	0	0	0	0	0	0	0	0	0	0	0	0.0538693	0	0	0	0	0	0	0
ENSG00000228935.1	0	0	0	0	0	0	0	0	0	0	0	0	0	0	0	0	0	0	0	0	0	0	0	0	0	0	0	0	0	0	0	0	0	0	0	0	0	0	0	0	0	0	0	0	0	0	0	0	0
ENSG00000251012.1	0	0	0	0	0	0	0	0	0	0	0	0	0	0	0	0	0	0	0	0	0	0	0	0	0	0	0	0	0	0	0	0	0	0	0	0	0	0	0	0	0	0	0	0	0	0	0	0	0
ENSG00000105697.6	0.0385534	0.0250669	0.0375398	0.0405007	0.0272756	0.0204054	0.021239	0.104718	0.0152178	0.0626412	0.00616267	0.0345013	0.00931603	0	0.00638722	0.023245	0.0833124	0.014661	0.155691	0.0295909	0	0.00712142	0.247188	0.00567715	0	0.0380507	0	0.0375529	0.0107303	0.0392905	0.068559	0.0110946	0.0201121	0.0142655	0.492098	0.0336004	0.0157804	0.149339	0.0684625	0.466428	0.210896	0.0385854	0.193939	0.287259	0.329085	0.193031	0.130713	0.571058	0.0247048
ENSG00000199788.1	0	0	0	0	0	0	0	0	0	0	0	0	0	0	0	0	0.175609	0	0	0	0	0	0	0	0	0	0	0	0	0	0	0	0	0	0	0	0	0	0	0	0	0	0	0	0	0	0	0	0
ENSG00000121680.14	8.45886	9.60777	10.3976	8.30787	4.5028	13.2248	11.4718	8.35599	10.4518	11.2579	8.58836	10.0447	11.3077	7.81824	11.3196	12.0231	11.3965	10.3501	12.0281	6.93216	9.2402	10.8422	7.82247	9.36365	8.04791	9.92134	9.30654	9.89941	10.264	6.86115	11.3086	8.19073	12.7585	10.1897	8.58363	11.6729	7.74045	9.14321	9.72054	16.0122	18.9336	38.7012	9.14295	8.1309	13.7792	11.6668	11.8395	7.34763	14.433
ENSG00000233757.5	0.0755506	0.120076	0.0551733	0.0529111	0.267251	0.0533161	0.0369962	0.196658	0.0198809	0.0572851	0.0724595	0.0450733	0.0243414	0.0903789	0.100133	0.0759197	0.0855182	0.121306	0.0677992	0.202956	0.10284	0.0651251	0.14584	0.0890012	0.0932002	0.0745655	0.151091	0.0735901	0.0700914	0.15399	0.0597114	0.10146	0.0613081	0.102502	0.265319	0.0658446	0.0927713	0.148647	0.156522	0.110791	0.0918398	0.0756134	0.156846	0.187641	0.0747695	0.0420301	0.170767	0.161793	0.187195
ENSG00000230221.2	0.0175969	0.01017	0.0114229	0	0.00829958	0.0124181	0.00861698	0.0318641	0	0.0152487	0	0	0.011339	0	0.0310967	0.00707315	0	0.0118964	0.0180474	0	0	0.0086678	0	0.00690992	0	0.00771887	0.0070383	0.0114268	0.00653015	0.0191289	0.00927181	0	0.00815978	0.00868158	0.00950722	0	0	0	0	0	0	0.023482	0	0	0.0348299	0.0195789	0.00757604	0.00837422	0.00601386
ENSG00000230643.1	0	0	0	0	0	0	0	0	0	0	0	0	0	0	0	0	0	0	0	0	0	0	0	0	0	0	0	0	0	0	0	0	0	0	0	0	0	0	0	0	0	0	0	0	0	0	0	0	0
ENSG00000023041.10	10.9993	10.3071	10.6913	14.2355	5.65146	15.8508	9.77363	10.8014	13.5596	11.2687	12.279	10.5211	13.2949	12.0215	7.14033	8.6106	10.1461	10.3417	12.0866	11.2227	9.2931	12.3248	15.7275	10.6186	13.1024	9.62078	10.3375	9.00233	9.90143	8.89193	11.6237	8.68726	10.5795	8.93036	10.3066	19.2668	8.26289	10.1086	13.1682	6.98092	19.0597	13.1233	14.2549	12.0347	11.9044	15.2309	10.4225	11.5869	10.7455
ENSG00000241336.1	0	0	0	0	0	0	0	0	0	0	0	0	0	0	0	0	0	0	0.024125	0	0	0	0	0	0	0	0	0	0	0	0	0	0	0	0	0	0	0	0	0	0	0	0	0	0	0	0	0	0
ENSG00000267532.3	0.222758	0.288033	0.26837	0.190381	1.50117	0.29575	0.299513	0.430713	0.30402	0.402423	0.0965623	0.254853	0.284646	0.758788	0.220178	0.241299	0.172501	0.141662	0.865443	0.359335	0.148012	0.200853	1.13696	0.13788	0.219265	0.536592	0.303535	0.147103	0.201758	0.978868	0.190977	1.24296	0.157567	0.20676	0.789423	0.361957	0.735603	0.239569	0.375457	0.13288	0.0771053	0.0906888	0.0940584	0.0375087	0.0784671	0.0126025	0.0438886	0.113196	0.0851615
ENSG00000100336.16	1.95531	1.05153	0.980993	0.798418	0.698699	0.266617	2.48785	1.63379	0.899996	1.25786	5.16609	0.582983	2.26149	1.17152	1.12445	1.12696	0.785729	1.04182	2.16172	1.42445	0.324801	1.49367	16.3298	1.12828	1.87935	1.6616	1.40375	1.40099	0.339437	1.02134	2.45689	2.73902	1.08341	0.88782	6.29548	3.66816	1.90451	1.18347	1.91854	4.19899	3.25834	0.610297	4.98545	2.00836	2.63697	2.59958	1.06583	3.37351	1.14167
ENSG00000255150.1	0.525139	0.996399	0.56922	0.555133	1.02344	0.566375	0.66957	0.363319	0.54754	0.605317	0.608185	0.263473	0.268154	0.604502	0.380834	0.382336	0.67293	0.361719	1.03652	0.501924	0.679753	0.409968	1.52466	0.478564	0.462593	0.599784	0.867908	0.434302	0.4302	1.16326	0.689128	1.5055	0.358373	0.747914	1.23659	1.13987	1.21667	1.08196	0.545443	0.26154	0.491418	0.19833	0.227851	0.196869	0.441263	0.529165	0.281545	0.650707	0.30476
ENSG00000181296.3	0	0	0	0.0429553	0	0	0.0225262	0	0	0	0	0	0	0	0	0	0	0	0	0	0	0	0	0	0	0	0.0183993	0	0	0	0	0	0	0	0	0	0	0	0	0	0	0	0	0	0	0	0	0	0
ENSG00000125895.5	0.144401	0.500734	0.255645	0.239034	0.157884	4.49534	0.212134	0.436787	0.652885	0.528963	0.159476	0.32222	0.266455	0.306225	0.26098	0.498638	0.291782	0.159745	0.37361	0.745598	0.278756	0.407371	0.271506	0.154645	0.284019	0.561434	0.378043	0.23016	0.189989	0.449512	0.383882	0.196439	0.146093	1.00062	0.319159	0.12585	0.462094	0.24214	0.454571	5.13992	3.21707	4.65094	2.67916	2.15184	0.623598	0.481995	11.5041	3.27041	0.235534
ENSG00000207961.2	0	0	0	0	0	0	0	0	0	0	0	0	0	0	0	0	0	0	0	0	0	0	0	0	0	0	0	0	0	0	0	0	0	0	0	0	0	0	0	0	0	0	0	0	0	0	0	0	0
ENSG00000231138.1	0.0179972	0.0312041	0	0.0504166	0.10186	0	0	0	0	0	0	0	0	0	0	0	0	0	0	0.0552535	0	0	0	0.0212013	0	0.0236833	0	0	0.0200361	0.029346	0	0	0	0.0266371	0.0583408	0	0	0	0	0	0	0	0	0	0	0	0	0	0
ENSG00000263476.1	0	0	0	0	0	0	0	0	0	0	0	0	0	0	0	0	0	0	0	0	0	0	0	0	0	0	0	0	0	0	0	0	0	0	0	0	0	0	0	0	0	0	0	0	0	0	0	0	0
ENSG00000201372.1	0	0	0	0	0	0	0	0	0	0	0	0	0	0	0	0	0	0	0	0.208104	0	0	0	0	0	0	0	0	0	0	0	0	0	0	0	0	0.221958	0.200049	0	0	0	0	0	0	0	0	0	0	0
ENSG00000117090.13	1.20286	1.15472	2.36895	1.19937	0.120197	0.503562	2.86028	1.36133	1.57192	1.85061	1.2688	0.736739	1.12979	1.30481	0.815137	0.758023	1.3217	1.2129	1.30684	1.14752	0.599433	1.70218	1.22001	1.30894	1.4858	0.827225	0.909224	1.48276	1.05164	0.548521	2.89502	0.876132	1.08246	0.769463	1.12352	1.33855	0.7566	2.16609	0.724076	0.328871	1.14994	0.0680148	0.722784	0.675139	0.907953	0.759908	0.0877749	0.941118	0.215995
ENSG00000204379.9	0	0	0	0	0	0	0	0.018394	0	0	0	0	0	0	0	0	0	0	0	0	0	0	0	0	0	0	0	0	0	0	0	0	0	0	0	0	0	0	0	0	0	0	0	0	0	0	0.034987	0	0
ENSG00000279228.1	0	0	0	0	0	0	0	0	0	0	0	0	0	0	0	0	0	0	0	0	0	0	0	0	0	0	0	0	0	0	0	0	0	0	0	0	0	0	0	0	0	0	0	0	0	0	0	0	0
ENSG00000243415.2	0.0179749	0.0934962	0.0875116	0.25177	0.203468	0.0951366	0.0792186	0.17088	0.170281	0.0233643	0.11493	0.0183836	0.13899	0.0322542	0.0714704	0.0216752	0.066588	0.109367	0	0.22074	0.0880827	0.0531238	0.0297412	0.063525	0.0409367	0.260194	0.0862737	0.10505	0.0600337	0.234477	0.0568257	0.0413813	0.125026	0.0532083	0.145671	0.0313313	0.117717	0.0530488	0.0957584	0	0.0524409	0.0719592	0.0688919	0.178573	0.160101	0	0.139298	0	0.0184291
ENSG00000229269.1	0	0	0	0	0	0	0	0	0	0	0	0	0	0	0	0	0	0	0	0	0	0	0	0	0	0	0	0	0	0	0	0	0	0	0	0	0	0	0	0	0	0	0	0	0	0	0	0	0
ENSG00000227097.5	205.912	635.11	330.981	9.67518	129.307	356.237	243.033	461.918	23.23	248.257	369.668	10.9501	688.479	442.371	323.996	276.289	548.454	27.3884	372.14	196.799	362.409	286.827	552.14	212.952	232.51	13.6348	475.425	19.3773	228.086	314.584	272.748	7.95112	357.171	9.30347	390.512	352.656	220.644	266.036	11.1622	106.36	18.1371	819.079	15.6198	43.2325	4.92197	137.878	18.3787	494.364	874.066
ENSG00000101004.13	0.733978	0.581877	0.437272	0.676361	1.76962	0.569936	0.571052	0.996804	0.987321	0.536652	0.200687	0.227176	0.471399	0.771169	0.521598	0.558995	0.38758	0.49947	1.0363	0.63377	0.398322	0.795624	0.675131	1.10641	0.371159	0.826078	0.843053	0.49857	0.502642	1.46846	0.68696	1.15614	0.298925	0.879079	1.8471	0.639683	1.17403	1.15434	1.18762	0.46736	0.422634	5.82837	0.573724	0.263847	0.222218	3.14302	3.5862	0.324016	3.32943
ENSG00000238976.1	0	0	0	0	0	0	0	0	0	0	0	0	0	0	0	0	0	0	0	0	0	0	0	0	0	0	0	0	0	0	0	0	0	0	0	0	0	0	0	0	0.45021	0	0	0	0	0	0.199314	0	0
ENSG00000228830.1	0	0	0	0	0	0	0	0	0	0	0	0	0	0	0	0	0	0	0	0	0	0	0	0	0	0	0	0	0	0	0	0	0	0	0	0	0	0	0	0	0	0	0	0	0	0	0	0	0
ENSG00000272762.4	0	0	0	0	0.0258826	0.0193632	0.0268724	0	0	0	0	0	0	0	0	0	0	0	0	0	0	0.0270308	0	0	0	0	0	0	0	0	0.057829	0	0.0508932	0.0541476	0	0.0318844	0	0.0269927	0.064966	0	0	0.0732296	0.0350541	0	0	0.0610575	0.0708785	0.0783459	0.131281
ENSG00000258011.2	0.179083	0.388125	0.174375	0.125419	0.126697	0.236961	0.328855	0.182407	0.353438	0.756527	0.171756	0.0915775	0.086547	0.0803368	0.0593381	0.0539873	0.331707	0.363207	0.206626	0	0.146261	0.0661588	0.0740775	0.316449	0.0509813	0.117832	0.107443	0	0.299057	0.146006	0.212307	0	0.124563	0	0.0725659	0.234114	0.0733008	0.264262	0.0795031	0	0.522466	0	1.02955	0	0.132924	2.2416	0.231303	0.255672	0.0918042
ENSG00000243886.1	0.0254041	0	0	0	0	0.0268915	0	0.0345009	0	0	0	0	0	0	0	0	0	0	0	0	0	0.0375402	0.0420335	0	0	0	0.0304829	0	0	0	0.0803124	0	0	0	0	0	0	0	0	0	0.0741152	0	0	1.00952	0	0.339185	0	0	0
ENSG00000247626.4	4.65586	12.0379	4.22936	4.76484	1.35971	1.96833	4.23514	5.74882	6.1676	5.91443	4.64509	2.57497	4.78345	4.72473	4.97355	4.61777	6.96551	5.23787	4.99681	6.2472	4.23027	5.05533	4.26121	5.69985	5.00627	4.6157	5.47136	4.6146	5.42403	3.63529	3.92659	4.09276	4.89941	5.19138	3.52787	9.88258	3.2332	4.6157	4.13816	11.8796	9.01346	7.44402	11.6753	8.21021	11.3125	8.59635	8.04902	4.76063	9.69482
ENSG00000234450.1	0.201003	0.0580843	0.0326198	0.375388	0.189606	0.070924	0.0492143	0.090993	0.105787	0.130635	0	0.0342623	0	0.0601135	0	0.161588	0.124103	0.135888	0	0.154276	0.109442	0.0495045	0	0.0394647	0.152591	0	0.120594	0.228418	0.0745915	0	0.105908	0.154248	0.139809	0	0.325792	0.17518	0	0.0988693	0.178469	0	0.0977362	0.536453	0.0641983	0	0	0.223643	0.475961	0.0956556	0.137388
ENSG00000237294.1	0.0191748	0	0	0.0268577	0	0.0101487	0.0140845	0.0390614	0.0302747	0.012462	0.0122602	0.00980539	0	0.0172037	0.0254138	0.0231221	0	0.0194447	0.0147493	0	0	0.028335	0	0.0112943	0	0	0	0.00933859	0	0	0.0151548	0	0	0	0	0	0.0313939	0	0	0.0843567	0.0839123	0.0383814	0	0.0952467	0.0284648	0.0320017	0.012383	0.0136877	0
ENSG00000224344.1	0	0	0	0	0	0	0	0	0	0	0	0	0	0	0	0	0	0	0	0	0	0	0	0	0	0	0	0	0	0	0	0	0	0	0	0	0	0	0	0	0	0	0	0	0	0	0	0	0
ENSG00000065029.13	3.14515	3.57864	3.07079	3.01072	2.86302	2.87695	4.13076	3.65911	5.48534	3.58548	3.44817	2.77088	4.43191	3.36243	3.40107	4.03996	4.27686	4.41578	5.46962	3.79483	2.8549	4.69187	4.68427	3.24951	2.94155	4.48188	3.9252	3.22587	3.20174	3.42478	4.48857	3.63018	4.33365	5.05352	4.5021	5.29224	3.46324	5.16134	5.15635	7.51991	5.7536	11.1284	3.27564	3.48119	3.76814	3.8869	4.66388	3.96862	5.90379
ENSG00000230813.1	0	0	0	0	0	0	0	0	0	0	0	0	0	0	0	0	0	0	0	0	0	0	0	0	0	0	0	0	0	0	0	0.0800832	0	0	0	0	0	0	0	0	0	0	0.133323	0	0	0	0	0	0.035665
ENSG00000165671.17	5.1991	4.35786	4.79091	4.51893	5.44834	4.11026	4.61652	6.73382	4.96463	3.44021	4.49928	2.95796	2.9215	4.7321	4.41221	4.14058	4.461	4.86888	3.56359	6.12559	3.95008	5.74069	2.47696	5.35899	5.04468	4.69893	5.48026	4.50706	4.40651	5.55398	4.79584	4.07958	3.40379	5.75122	6.53727	2.27595	3.95772	6.70861	4.47681	4.00262	2.79041	6.79693	8.31456	7.44084	2.6306	4.19954	3.77981	7.39002	5.43294
ENSG00000107864.13	1.81321	1.14522	1.46802	2.31677	0.942363	1.58431	1.32783	1.63504	1.82575	0.834776	1.48809	1.43153	1.42541	1.484	1.72176	1.57974	1.45051	1.98346	1.19347	1.64869	2.2176	1.67363	1.03234	1.7459	1.63971	1.57949	1.94299	1.56655	1.46662	1.31869	1.50104	1.19207	1.61881	1.79274	1.17142	0.870664	1.62064	1.70637	1.73503	0.531262	0.325619	0.263693	0.610095	0.418074	0.516068	0.513013	0.290675	0.924715	0.425834
ENSG00000102575.9	26.0938	13.8354	22.1503	10.7293	2.11521	11.0443	45.1868	13.4064	33.7763	38.3867	13.6123	11.0028	29.3566	25.7516	15.1741	21.9985	23.2082	31.5473	27.4624	13.3888	18.2043	30.8506	19.3527	18.491	16.336	9.32731	26.789	31.8286	12.2122	8.98541	38.2153	16.1396	31.1149	23.4532	20.8962	41.3319	10.6932	17.5258	25.9512	56.831	20.062	12.2581	27.6497	34.3115	26.4005	40.108	5.5927	56.9031	3.41418
ENSG00000243453.1	0	0	0	0	0	0	0	0	0	0	0	0	0	0	0	0	0	0	0	0	0	0	0	0	0	0	0	0	0	0	0	0	0	0	0	0	0	0	0	0	0	0	0	0	0	0	0	0	0
ENSG00000237730.1	0.0475597	0	0.0694641	0.066616	0.0672946	0.0503444	0	0.0968852	0.225273	0.216369	0.0608185	0	0.0919385	0.0426707	0.0315173	0	0.0587284	0.217031	0.036583	0	0	0.14056	0.0786922	0.0280135	0.0270786	0	0.114136	0.115814	0.0264739	0	0.187944	0.109491	0.0992417	0	0.0385432	0.0828994	0	0.070181	0.0422279	3.34772	1.45691	0	0.136711	1.6537	0.776622	7.22311	0.030714	0	0.0731424
ENSG00000065548.16	18.7251	20.7401	18.2103	24.4595	13.1885	20.8042	15.8272	19.3659	17.9851	25.673	19.8852	17.1713	24.0751	20.1819	15.3189	15.197	18.5427	19.3182	26.0861	18.4337	16.9006	17.9441	29.5924	17.6788	23.1938	16.5049	18.2022	19.0531	19.9267	19.3916	18.6809	20.9024	19.2945	16.1794	18.9821	35.6812	19.8051	22.4875	24.061	11.64	44.1751	47.386	45.3306	26.0087	33.9714	15.7574	37.9327	21.7963	41.7186
ENSG00000173418.10	14.5729	14.343	14.6237	14.6911	11.1781	11.8523	13.1841	12.8183	14.8059	18.9502	14.3494	12.4192	20.8775	14.2196	12.1454	13.2588	14.0975	14.908	24.3725	13.7952	11.179	14.3264	29.5266	14.8587	15.7602	11.4966	14.8124	14.6585	14.2596	12.5731	14.6685	17.0206	14.2596	11.5751	14.9618	28.9663	15.813	14.4503	19.3951	9.72278	27.1089	19.4548	19.6317	21.6526	23.6362	30.7915	17.5922	22.4265	27.9607
ENSG00000264095.1	0	0.226581	0.127247	0	0	0	0	0	0	0	0	0	0	0	0	0	0	0	0	0	0	0	0	0	0	0	0	0	0	0	0	0	0	0	0	0	0	0	0	0	0	0	0	0	0	0	0	0	0.133985
ENSG00000225098.1	0	0	0	0.0588072	0	0.0222215	0	0.0285094	0	0	0	0	0	0	0	0.0253139	0.0259221	0	0	0.0322246	0.0342898	0.0310209	0	0	0.0239044	0	0	0.0408952	0	0	0.0331826	0	0.0584056	0	0	0	0	0	0	0	0	0	0	0	0	0	0.0271137	0	0
ENSG00000214135.7	2.42728	4.21569	2.07308	4.44417	2.54949	2.1134	2.1967	4.80405	7.08273	2.42821	2.06578	2.24524	3.01872	4.28864	1.87754	2.45246	3.50878	3.99461	2.42783	5.98327	3.90393	4.0949	2.02865	2.41538	2.72626	5.12377	3.64814	2.54182	2.83139	3.0326	3.2148	2.82262	2.40283	4.1811	2.59149	2.80135	2.47531	4.31527	4.65604	3.35297	1.71599	4.89177	4.56419	2.88052	1.32817	2.30894	8.05703	2.37727	8.4214
ENSG00000252700.1	0	0	0	0	0	0.247662	0	0	0	0	0	0	0	0	0	0	0	0	0	0.359148	0	0	0	0	0	0	0	0	0	0	0	0	0	0	0	0	0	0	0	0	0	0	0	0	0	0	0	0	0
ENSG00000118702.8	0	0	0.0495592	0	0	0.269387	0.0747712	0.0345614	0.160721	0	0.0325432	0.0260273	0.0983903	0	0.067458	0	0.125699	0.0516137	0	0.0390652	0.0415688	0.0376061	0.0421072	0	0.0579577	0.0669781	0.0305364	0	0.0283317	0	0	0	0	0.0753317	0.041248	0	0.0416657	0.112659	0.0451912	0	0	0	0	0	0	0	0	0	0
ENSG00000172382.8	0.0440978	0.12743	0.0381675	0.0274519	0.15599	0.0363065	0.0971736	0.0465799	0.143118	0.353471	0.0407271	0.0175391	0.0378872	0.065941	0.0259761	0.0590843	0.0514283	0.0720464	0.0603024	0.0413678	0.0680294	0.0325822	0.340499	0.0404045	0.0111589	0.151524	0.0646725	0.0262493	0.0354565	0.0838897	0.100685	0.0733206	0.0170403	0.130536	0.150892	0.119568	0.0561548	0.0650724	0.0739576	0.0646673	0.0142948	0.137307	0.0328636	0.048677	0.0727364	0.122662	0.132899	0.195867	0.105495
ENSG00000152315.4	0.598174	0.269256	0.750462	0.499488	0.0651066	0.133946	0.566121	0.179659	0.690172	0.762573	0.330981	0.28824	0.466983	0.588287	0.373533	0.492436	0.610804	0.589096	0.707871	0.167754	0.291246	0.654453	0.704236	0.379437	0.504315	0.13624	0.517617	0.610663	0.33297	0.178194	0.681875	0.463447	0.520081	0.451184	0.41019	0.661684	0.386094	0.483781	0.367694	0.657895	0.352385	0.253284	0.606219	0.628545	0.683065	0.403169	0.0742885	0.952536	0.100249
ENSG00000213413.2	0.0292454	0.03803	0.0355957	0	0.0827616	0.0309577	0.0107408	0.0397177	0.103894	0.019007	0.0186992	0.0224328	0.0282674	0.0393586	0.0581417	0.0264494	0.0451416	0.0444856	0.0224956	0.089787	0.071656	0.0108042	0.036292	0.017226	0.0249767	0.0962135	0.0350922	0.0213649	0	0.0476873	0.0924564	0.033664	0.0610256	0.0541067	0.0592524	0	0.023941	0.183412	0.0389501	0	0.0426611	0.146348	0.0840662	0	0.0217073	0.0244045	0.0566599	0.0417529	0.0224883
ENSG00000217315.1	0	0	0	0	0	0	0	0	0	0	0	0	0	0	0	0	0	0	0	0	0.0521325	0	0	0	0	0	0	0	0	0	0	0.0367378	0	0	0	0	0	0	0	0	0	0	0	0	0	0	0	0	0
ENSG00000157890.16	0.033947	0.0537404	0.0474261	0.0289428	0.0187957	0.024998	0.0281876	0.0320716	0.0466073	0.0287775	0.0283114	0.037738	0.0171192	0.0132423	0.0136934	0.0213576	0.0328062	0.0493922	0.0113531	0.0475794	0.0530396	0.0283538	0.00732635	0.0226035	0.016807	0.0699222	0.0301076	0.0258778	0.0115022	0.0336936	0.0419948	0.00679583	0.0164258	0.0393215	0.0119614	0.00514537	0.0265816	0.0392037	0.0314518	0.0129865	0.0387544	0.0295437	0.0311128	0.014663	0.0657314	0.0197064	0.0457523	0.0147503	0.0151326
ENSG00000249898.6	0.457173	0.553212	0.366325	0.320177	0.202149	0.0856979	0.405768	0.504465	0.593999	0.241413	0.310581	0.316583	0.432678	0.487085	0.422886	0.35604	0.588055	0.478096	0.358984	0.387446	0.365604	0.387049	0.220627	0.476855	0.422981	0.350942	0.588572	0.417477	0.392328	0.170835	0.504352	0.328904	0.410738	0.465197	0.262438	0.564457	0.288487	0.323257	0.549683	0.0838028	0.0416807	0.133453	0.0912603	0.0473107	0.12725	0.0158958	0.0984139	0.24476	0.322249
ENSG00000101882.8	1.88718	2.16013	2.1811	2.08481	2.17365	2.09688	1.99223	1.98647	1.98158	2.18789	1.84932	1.71584	2.38709	2.30483	1.88992	1.65081	2.15563	2.00132	2.38026	1.94915	1.98403	2.14789	2.61781	2.02833	2.10084	1.88615	2.20273	1.80957	2.01301	1.84573	2.25109	2.22095	1.99644	2.05883	2.34399	2.39583	2.45497	2.42415	2.69859	1.18028	3.34527	3.56783	2.34173	2.1724	5.6521	2.09156	2.49443	2.8989	3.20657
ENSG00000140451.11	0.274163	0.210668	0.248754	0.506201	0.312987	0.277024	0.791795	0.92661	0.964121	0.692483	0.529876	0.289956	0.57817	0.458417	0.326206	0.341873	0.603997	0.606594	0.589524	0.894322	0.234093	0.685972	0.329912	0.546853	0.475387	1.45954	0.515891	0.303464	0.350313	0.198124	1.28533	0.494896	0.338053	0.991398	1.05034	0.836294	0.453974	0.882689	0.398335	4.11184	1.07254	2.50693	2.64486	2.63084	1.14698	4.74203	2.67593	1.73468	2.02833
ENSG00000182544.8	19.7662	16.6143	23.1977	21.5695	8.27038	12.6779	16.4137	17.2804	13.6121	19.1618	16.6091	22.9862	19.882	18.7478	23.1436	18.2374	17.7942	15.9523	15.9867	14.3386	16.6438	20.4472	13.3071	17.9688	19.7563	13.7637	16.0839	17.507	19.7656	12.7933	19.6333	14.763	22.4934	16.9943	12.8169	16.1639	15.2195	14.4056	16.158	15.5769	14.2651	11.3847	12.8165	14.8519	18.7387	11.1057	19.6574	15.181	13.4375
ENSG00000279390.1	0	0.022958	0.0128931	0	0.00936781	0.0140165	0.00972606	0.00899132	0.0104531	0.00860565	0.0169326	0.00677113	0	0.01188	0.00877478	0.015967	0.00817534	0.00671378	0	0.0304891	0.0865148	0	0.0109544	0.0233978	0.022617	0.0261371	0.00794419	0.0128976	0.0221119	0.0323865	0.0209303	0.0152418	0	0.00979897	0	0	0.0108396	0	0	0.233011	0.0193153	0	0	0	0.0589693	0.0220989	0	0.00945205	0.0135758
ENSG00000187791.10	0.00329975	0	0.003213	0	0	0.125746	0	0	0.00520992	0.0128674	0	0.00674957	0.0127576	0.00592109	0	0.00795809	0	0.0066924	0.00507635	0.00506533	0	0.00975226	0.0163793	0.00388722	0	0.00868461	0.0118783	0.00642825	0	0.0107611	0	0.00759661	0.00459034	0.0195355	0.0160451	0	0.00540252	0.00486925	0	0	0	0.01321	0	0	0	0	0	0	0.0135326
ENSG00000232490.5	0	0.0436073	0	0.0176141	0	0.00665585	0	0	0	0	0	0	0	0	0	0.00758209	0.00776427	0.0063762	0.00967301	0	0	0	0	0.00740712	0.00715992	0.0165486	0	0	0.00700003	0	0	0	0	0.0186125	0	0	0	0	0.0111656	0	0	0.0503434	0	0	0.0560042	0.0209877	0.0162423	0.0269304	0.00644659
ENSG00000064199.5	1.0841	1.29014	1.18585	1.71755	1.06075	0.914517	1.82188	1.83564	1.53565	2.15175	2.17036	0.960534	2.09569	1.54024	1.39621	1.39129	1.67249	1.75219	2.35804	1.56148	1.3338	1.4455	1.93669	1.99281	1.85648	1.54397	1.45131	1.49844	1.64128	1.26785	1.83257	1.75154	1.69032	1.5633	1.71197	2.84175	1.71562	1.78068	1.79645	0.294252	1.18707	1.33881	1.09483	1.05209	1.00945	1.17209	2.04813	2.22413	3.57449
ENSG00000253465.1	0	0	0	0	0	0	0	0.058284	0.13552	0	0.0548806	0	0.165924	0	0	0	0	0	0	0.0658792	0	0.0634185	0	0	0.0488696	0	0	0.0418026	0.0477783	0	0.0678378	0	0.238806	0.444635	0	0	0	0	0	0	0	0	0	0	0	0	0.0554306	0	0
ENSG00000275101.1	0	0	0	0	0	0	0	0	0	0	0	0	0	0	0	0	0	0	0	0	0	0	0	0	0	0	0	0	0	0	0	0	0	0	0	0	0	0	0	0	0	0	0	0	0	0.672481	0	0	0
ENSG00000165105.9	6.97252	11.4348	6.56404	10.4385	0.583426	4.30006	5.79778	7.70045	10.4955	8.06491	6.46405	9.60551	8.72572	5.33188	5.99696	7.02675	10.1455	8.02861	5.80965	6.83186	8.01805	6.24462	4.6746	8.751	7.94471	6.05478	8.31674	8.8826	6.96822	7.98272	6.07973	4.91704	5.85131	7.78509	4.23622	7.01603	5.43998	10.4016	8.94534	3.64717	4.48084	8.82114	8.13158	7.23901	5.11055	5.9349	8.52948	7.79291	9.26247
ENSG00000223816.5	0.0817224	0.141693	0.238722	0.572334	0	0	0.180083	0.110986	0.0645149	0.212451	0.313515	0.0417903	0.0789894	0.0733215	0.324939	0.492729	0.454111	0.414363	0.125722	0.0627244	0.0667443	0.301908	0.0676088	0.0481359	0	0	0.294181	0.278606	0.0909806	0.199884	2.06686	0	0	0.0604776	0.0662292	0.284894	0	0.0602964	0	0	0.357632	0	0	0	0.121316	0	0	0	0
ENSG00000272872.1	0.0627048	0.0724798	0	0.0585529	0.0295747	0	0	0.0567723	0	0.0271686	0	0	0.0404052	0.037506	0	0.0252045	0.02581	0	0	0.0320853	0.0341416	0.0617737	0	0	0	0	0	0	0.0232695	0.34082	0	0	0	0.0618719	0.033878	0	0	0.0308432	0.0371167	0	0.182939	2.51028	0.0801092	0	0.372339	0.0697675	3.72551	0.358088	0.0642894
ENSG00000166128.11	4.51072	4.90918	5.408	4.78251	6.42191	5.47171	4.99141	5.01213	4.08287	4.66298	4.24858	2.98138	4.56209	4.89047	3.7157	2.89289	3.49632	3.57281	5.43729	5.2542	3.86398	5.14451	7.76805	3.50309	4.4249	5.20169	4.59913	3.5921	3.35714	4.77152	5.74552	7.85418	2.61553	3.11308	6.69621	4.23999	6.99239	6.21574	6.23665	1.22723	3.52394	3.65178	4.60269	4.57267	4.5469	3.70589	1.27906	7.52709	2.06782
ENSG00000114487.8	0.0231228	0.0334093	0.00750498	0.0215918	0.00545294	0.0122383	0.0169844	0.0366365	0.0304235	0	0	0.00394143	0.0148997	0.0414917	0.0255387	0	0.0190352	0.0351724	0.0118574	0.00591583	0.0251799	0.0113897	0.00637649	0.00907982	0.0263304	0.0202856	0.00924852	0.0262766	0.042904	0	0.0121834	0.00887213	0.0107222	0.0114078	0	0.00671741	0	0.0113736	0.0479046	0	0	0	0	0	0	0	0	0	0
ENSG00000281117.1	0	0	0	0	0	0	0	0	0	0	0	0	0	0	0	0	0	0	0	0	0	0	0	0	0	0	0	0	0	0	0	0	0	0	0	0	0	0	0	0	0	0	0	0	0	0	0	0	0
ENSG00000266236.1	0.0377262	0.555993	0.0918359	0.369896	0.186832	0.0599026	0.304822	0.409883	0.744564	0.0980754	0.168852	0.077168	0.0729291	0.203088	0.125003	0.0909851	0.116464	0.229543	0.0580381	0.347472	0.0616235	0.334494	0	0.0444427	0.128879	0.421988	0.316879	0.128615	0.0840003	0.15379	0.149084	0.130278	0.262407	0.362944	0.183444	0.065759	0.185301	0.167011	0.0669935	0.165971	0.275161	0.528605	0.686814	0.936985	0.224017	0.440742	0.535997	0.242373	0.174058
ENSG00000186352.7	0.910824	0.994322	0.750015	1.76403	0.453456	1.80928	1.07375	1.07663	1.68664	2.22167	0.898722	1.2593	1.34772	2.16909	1.51271	1.76275	0.971978	2.88496	1.15903	0.811285	0.762257	1.56196	1.95358	1.17896	2.02313	1.05062	1.34928	2.16321	2.33473	1.1093	1.19978	0.919001	2.17434	1.96388	1.27581	1.48962	1.43601	1.14493	2.07669	1.48409	2.46045	0.630229	4.01884	4.74776	1.43557	3.79092	1.64118	2.27964	0.956899
ENSG00000207195.1	0	0	0.127247	0	0	0	0	0	0.206332	0	0	0	0	0	0	0	0.161371	0	0	0.200605	0	0	0	0	0	0	0	0	0.145487	0	0	0.300853	0	0.193419	0.211814	0	0	0	0	0	0	0.523163	0.250431	0	0	0	0	0	0.133985
ENSG00000108448.19	1.01195	0.836607	0.802632	0.891752	1.77797	0.425642	0.615321	1.05121	1.2327	0.662037	0.437067	0.476355	1.17891	1.46711	1.0481	0.95763	0.893746	1.14852	1.67019	1.46596	0.432397	0.980416	1.253	0.872372	0.827996	1.42868	1.29065	0.665829	0.701322	1.7976	0.471402	1.82055	1.15602	1.2597	1.71624	1.25575	0.894239	1.17187	1.07106	1.29725	0.371483	1.31461	1.42553	0.399469	0.81578	0.850038	0.510694	0.885019	0.776423
ENSG00000240023.1	0.0152853	0.0530042	0.133951	0.0856391	0.0865116	0.194163	0.022455	0.0415174	0.0482672	0.0794731	0.0977325	0.0468985	0.0295482	0	0.0810349	0.0737277	0.0377496	0.108503	0.0235149	0.0703915	0.0249676	0.0225874	0.177037	0.0540197	0.0522169	0.100573	0.0917056	0.0595544	0.0510508	0.0498481	0.144968	0.0351894	0.106318	0	0.0495497	0.0799294	0	0.0225555	0.0542866	0.134491	0.0891882	0.0611919	0.205042	0	0	0.255103	0.0789696	0	0.0156715
ENSG00000146373.15	0.754856	0.688839	0.595746	0.963505	2.406	0.736571	0.508607	0.844792	0.431925	0.498708	0.416601	0.351762	0.348897	1.19157	0.683026	0.588584	0.384062	0.48231	0.794555	1.1239	0.576642	0.575347	1.25649	0.510815	0.651463	1.07999	0.866268	0.472119	0.652079	1.84537	0.373212	1.60453	0.427932	0.477138	1.50315	0.492668	1.95697	0.314906	0.669222	0.0599257	1.18889	0.322642	0.800502	0.169154	1.65812	0.117457	0.0806366	0.442419	1.72476
ENSG00000105991.7	1.26832	1.25802	1.17379	0.86425	0.282934	1.1793	1.29252	1.42765	1.29894	1.09164	1.19086	1.27963	1.45784	0.83039	1.05252	1.01961	1.47446	0.851656	1.30079	1.0261	0.858555	1.00466	0.775144	0.881669	1.13199	0.80445	0.850063	1.24097	1.04311	0.801162	1.4359	0.82862	0.731186	0.744119	0.898228	0.707045	0.738955	1.22243	1.40006	0.150805	0.450033	1.30368	0.109484	0.908127	1.6623	0.247909	0.730531	1.30505	0.749765
ENSG00000255527.1	0	0	0	0	0	0	0	0	0	0	0	0	0	0	0	0	0	0	0	0	0	0	0	0	0	0	0	0	0	0	0	0	0	0	0	0	0	0	0	0	0	0	0	0	0	0	0	0	0
ENSG00000226742.3	9.43295	9.3825	9.1987	11.918	2.58557	4.10762	8.90327	9.97456	17.567	7.73091	7.59669	8.39912	16.3665	8.36831	9.16392	11.2217	8.68601	10.8249	15.228	10.4838	10.5333	10.7177	7.35443	10.9129	9.56048	11.1877	15.4078	8.9064	8.58508	4.29112	13.0817	6.1072	13.5149	17.1777	5.36324	11.191	8.4671	11.1711	16.375	1.55194	6.87491	5.36649	11.587	16.1912	8.29505	12.5992	8.77545	8.07829	5.67838
ENSG00000236935.1	9.15242	5.35196	5.99025	8.10296	0.427601	0.594094	6.94471	8.12038	6.37325	6.53752	6.04519	2.42844	13.2695	9.06371	6.46573	6.89784	8.02316	6.96093	13.9805	6.46146	3.9843	5.32697	3.50016	11.1633	7.39866	7.64119	7.89992	4.89899	9.46835	2.21746	6.92652	4.02525	9.84934	10.575	3.42874	13.3194	7.03295	8.37733	6.70807	2.27914	10.328	15.814	1.77873	0.428894	25.443	0.0720515	15.9196	0.277359	26.2921
ENSG00000183889.11	0.0165318	0.0382178	0.0196743	0.0308743	0.0493824	0.0213886	0.0323816	0.0424085	0.0667044	0.0119381	0.0211405	0.0187863	0.0106526	0.0230725	0.0121727	0.015505	0.0181458	0.0558816	0.0310842	0.0169182	0.00600082	0.021715	0.00607854	0.0108194	0.01255	0.0700993	0.0396737	0.0196812	0.0143147	0.0419325	0.0174212	0.0253727	0.0229976	0.0734048	0.0297725	0.0160088	0.0270666	0.029816	0.05219	0.0484861	0.0428718	0.0808892	0.063361	0.0547455	0.0381753	0.0183938	0.0854096	0.0104898	0.0640316
ENSG00000112996.8	5.54782	8.25643	5.73674	7.01723	3.66681	3.67164	5.32573	7.54711	6.33686	5.91613	5.6259	3.75553	6.39767	6.32052	6.19669	5.52227	6.45208	6.8545	7.3258	6.52002	5.09644	6.197	5.72745	6.27377	7.47595	6.44192	6.76078	6.4746	6.6294	5.27442	5.53081	5.25528	6.29907	5.8226	4.35199	9.23804	5.80525	6.3125	6.62457	8.43744	12.6987	7.45317	9.37204	7.73752	7.86071	8.79842	8.51286	7.14245	11.2585
ENSG00000026652.12	0.726196	1.0526	0.621736	0.820222	2.45063	0.306435	0.899148	0.730129	0.579818	1.42127	0.585956	0.812073	0.597983	1.06266	0.589767	0.839786	0.629142	0.318723	0.424987	0.853207	0.670107	0.782227	0.807427	1.15753	0.408757	1.01006	0.645097	0.406042	0.788208	1.72629	0.640626	1.27196	0.975705	0.675743	1.8956	0.288338	1.28375	0.402766	0.437689	0.625859	0.366781	0.834412	3.79134	2.95809	0.697405	0.331294	0.324758	0.649458	0.710627
ENSG00000243822.1	0	0	0	0	0	0	0	0	0	0	0	0	0	0	0	0	0	0.0390183	0	0	0	0	0	0	0	0	0	0	0	0	0	0	0	0	0	0	0	0	0	0	0	0	0	0	0	0	0	0	0
ENSG00000261170.1	0	0	0	0	0	0.0230903	0	0.029624	0	0	0.0278942	0	0	0	0	0	0	0	0	0.0334845	0	0.0322338	0	0	0.024839	0	0	0	0.0242843	0	0	0	0	0	0	0	0.0357135	0	0	0	0	0	0.0418013	0	0	0	0	0.031142	0.0447287
ENSG00000205560.11	0.205103	0.269776	0.196267	0.307096	0.0500362	0.112299	0.368843	0.456241	0.954749	0.23902	0.203494	0.112117	0.150392	0.253819	0.16404	0.072492	0.353702	0.322743	0.184966	0.358272	0.392786	0.386695	0.105319	0.237452	0.177179	0.674761	0.216405	0.134335	0.153538	0.12109	0.536617	0.162822	0.383709	0.434415	0.269389	0.295867	0.115795	0.349622	0.33282	0.746748	0.309506	1.79791	0.22363	0.316181	0.157486	0.495754	1.07334	1.06526	0.652611
ENSG00000155085.14	0.363433	0.46824	0.342689	0.4668	0.869939	0.43033	0.367192	0.612576	0.514848	0.375307	0.490468	0.343783	0.580374	0.55935	0.451223	0.342978	0.3796	0.42099	0.667392	0.610815	0.408279	0.454267	0.727306	0.470442	0.543074	0.506614	0.584328	0.349804	0.35503	0.536395	0.413261	0.81023	0.507576	0.510268	0.614676	0.646005	0.689106	0.563853	0.51018	0.139032	0.720836	0.621081	0.300056	0.342503	0.614149	0.417154	0.493529	0.408118	1.66573
ENSG00000276204.1	0	0	0	0	0	0	0	0	0	0	0	0	0	0	0	0	0	0	0	0	0	0	0	0	0	0	0	0	0	0	0	0	0	0	0	0	0	0	0	0	0	0	0	0	0	0	0	0	0
ENSG00000248514.1	0.0954324	0.165464	0.0929235	0	0.0450107	0.0673467	0	0.0432017	0.0502254	0.0413487	0.040679	0.0325341	0.0614939	0.0570814	0	0.0767188	0	0	0	0.146495	0.0519611	0.18803	0	0.0749484	0	0.0418613	0.190852	0.0309853	0.0354146	0.103741	0.100567	0.219702	0	0.329576	0.10312	0.0554481	0.0520821	0.187765	0.056489	0.839682	0	0.382047	0.487682	0	0	0.530906	0.0821735	2.77034	0.0326147
ENSG00000177683.12	3.4795	3.50819	3.56739	3.62044	3.42564	3.29943	2.64601	2.83527	2.84842	4.08569	3.13336	2.55084	4.40317	3.57304	3.19328	2.87007	2.92458	3.7983	5.20893	3.71194	3.30506	4.22574	7.57141	2.75905	3.88892	3.08976	3.2138	3.10725	2.95572	2.99893	2.82397	4.95434	3.12795	2.71777	2.95254	5.09152	4.66755	4.19388	5.20788	0.51454	6.35522	3.33607	3.31154	13.6817	5.95527	7.40773	3.88231	3.76535	4.11004
ENSG00000230302.2	0	0	0	0	0	0	0	0	0	0	0	0	0	0	0	0	0	0	0	0	0	0	0	0	0	0	0	0	0	0	0	0	0	0	0	0	0	0	0	0	0	0	0	0	0	0	0.0618335	0	0
ENSG00000255794.5	0.00842376	0	0.0027341	0	0.182761	0.00594465	0.00412501	0.0114402	0	0	0	0.00574354	0.0108561	0.0100771	0	0	0	0	0.00863943	0	0.00458657	0.00829867	0	0.00661565	0	0.0295606	0.00336928	0.00273505	0	0.0137357	0	0.0258573	0.0156246	0	0	0.0146831	0.00459726	0.00828696	0.0349038	0	0	0	0	0	0	0	0	0.0040088	0.00287888
ENSG00000091542.8	24.978	29.5656	26.181	22.165	32.3894	30.5705	25.0641	28.494	25.5377	26.9585	21.2361	21.3418	21.8001	28.8116	25.3608	30.3284	25.8968	24.5411	31.8505	30.8948	18.9183	29.9559	21.3	23.8378	26.7808	26.7063	28.8804	22.9391	24.1831	31.95	24.8124	32.0024	24.5692	30.2593	32.9454	19.847	27.8889	28.424	30.9108	27.4468	20.3639	21.226	26.787	34.9655	16.3493	34.6975	15.3643	30.415	15.898
ENSG00000204700.4	0	0	0	0	0	0	0	0	0	0	0	0	0	0	0	0	0	0	0	0	0	0	0	0	0	0	0	0	0	0	0	0	0	0	0	0	0	0	0	0	0	0	0	0	0	0	0	0	0
ENSG00000249066.1	0	0	0	0	0	0	0	0	0	0	0	0	0	0	0	0	0	0	0	0	0	0	0	0	0	0	0	0	0	0	0	0	0	0	0	0	0	0	0	0	0	0	0	0	0	0	0	0	0
ENSG00000233554.4	3.42424	3.2818	4.60759	4.14552	0.852159	3.3333	2.98287	2.57058	3.34169	2.19192	2.88256	5.08597	7.48432	3.0568	4.15071	3.92167	3.25096	3.94358	4.23547	1.71692	3.87877	2.87332	2.53393	2.75682	3.58575	2.35496	3.38617	3.70412	4.84664	2.16047	2.03996	3.16913	5.29014	3.20897	1.00404	7.5883	3.23984	2.92005	3.51398	1.05981	0.451813	0.619976	0.725449	1.53852	1.07285	0.459489	0.644521	0.54046	1.32316
ENSG00000174482.9	0.0125049	0.00722715	0.00811745	0.0233539	0.0766734	0.0529484	0.024494	0.0226437	0	0.0216724	0.0106607	0.00426309	0.00805783	0.0224389	0.0331475	0.0201056	0.00514717	0	0.0128251	0.0511889	0.00680869	0.00615962	0.0206906	0.0147312	0.00949307	0.0548528	0.0100033	0.028421	0.0232027	0.0747649	0.00658885	0.0383847	0.0057986	0.0123388	0.0472929	0.00726561	0.0682456	0.0369055	0.014804	0	0.0121609	0	0	0	0	0	0	0.00595099	0
ENSG00000277144.1	0.320568	0.463177	0.416188	0.374178	0.075598	0.282782	0.196223	0.870718	0.168713	0.173619	0.136646	0.327858	0.103283	0.287615	0.212437	0.289921	0.593774	0.325081	0.164388	0.328062	0.349086	0.315808	0	0.3147	0.456297	0.386697	0.320547	0.416333	0.475847	0.566276	0.380042	0.184501	0	0.434926	0.173196	0.0931283	0.437375	0.512463	0.379506	0	0	0.21389	0.153579	0	0	0.178337	0	0.381389	0.191724
ENSG00000105429.11	5.61759	6.51763	5.24758	3.93779	7.60568	3.40533	5.50734	7.97562	5.7982	3.28619	3.85934	3.21968	2.97377	6.41115	5.78524	7.01398	6.291	5.47805	3.6205	7.72263	4.31297	7.28338	1.9818	5.7101	6.12088	7.25648	7.1279	4.93258	5.28125	6.85335	4.4943	4.78368	4.37226	8.58442	6.51049	1.67199	4.78874	6.42984	4.12479	6.40852	2.25517	4.90734	2.5153	2.281	2.84035	4.04908	5.24898	5.21196	3.49182
ENSG00000250485.1	0	0	0	0	0	0	0	0	0	0	0	0	0	0	0	0	0	0	0	0	0	0	0	0	0	0	0	0.00686221	0	0	0	0	0	0	0	0	0	0	0	0	0	0	0	0	0	0.0235156	0	0	0
ENSG00000137474.18	0.629129	0.322283	0.394007	0.24033	0.465325	0.747697	0.712077	0.895189	0.99332	0.700673	0.349234	0.260299	0.395258	0.577285	0.363854	0.363804	0.467888	0.492988	0.470729	0.49824	0.406387	0.591614	0.525209	0.407625	0.358201	0.391371	0.636523	0.401107	0.394773	0.373037	0.610239	0.602388	0.312284	0.620066	1.72656	0.30406	0.386265	0.645638	0.733795	2.59163	0.976129	0.165999	2.56469	1.29264	1.10799	0.816125	2.30478	1.76372	0.61864
ENSG00000258394.1	0	0	0	0	0	0	0	0	0	0	0	0	0	0.050542	0	0	0	0	0	0	0	0	0	0	0	0	0	0	0	0	0	0	0	0	0	0	0	0	0	0	0	0	0	0	0	0	0	0	0
ENSG00000251627.1	0	0	0	0	0	0	0	0	0	0	0	0	0	0.0287933	0	0	0	0	0	0	0	0	0	0	0	0	0	0	0	0	0	0	0.0223221	0	0	0	0	0.0236783	0	0	0	0	0	0	0	0	0	0	0
ENSG00000267778.1	0.0171869	0	0.016735	0	0.0243186	0	0	0	0.027136	0	0	0	0	0	0	0.020725	0	0	0.0264403	0	0.0280737	0.0507949	0	0	0	0.022617	0	0	0	0.0560495	0.0271673	0.0395672	0.0239089	0	0.111428	0.0299577	0	0.0507232	0	0.453667	0.0501419	0.0688046	0.0658717	0	0	0	0.15539	0.0736118	0.0528636
ENSG00000274662.1	0	0	0	0	0	0	0	0	0	0	0	0	0	0	0	0	0	0	0	0	0	0	0	0	0	0	0	0	0	0	0	0	0	0	0	0	0	0	0	0	0	0	0	0	0	0	0	0	0
ENSG00000225942.1	0	0	0	0	0	0	0	0	0	0	0	0	0	0	0	0	0	0	0	0	0	0	0	0	0	0	0	0	0	0	0	0	0	0	0	0	0	0	0	0	0.0641209	0	0	0	0	0	0	0	0
ENSG00000255333.1	0	0	0	0	0	0	0	0	0	0	0	0	0	0	0	0	0.0361132	0	0	0	0	0	0	0	0	0	0	0	0	0	0	0	0	0	0	0	0	0	0	0	0	0	0	0	0	0	0	0	0
ENSG00000119523.9	12.4974	13.001	11.7048	13.5135	5.84852	8.81255	11.83	13.3469	14.0119	14.7907	11.2554	9.40464	12.3051	11.7624	11.2466	10.5608	14.4714	12.0667	13.7051	12.3242	9.15838	13.3298	13.1873	12.0929	14.1756	9.25962	13.1404	13.4046	12.1808	9.30099	12.5522	10.7808	11.9871	10.4505	12.3744	16.8167	10.8596	12.7513	14.4986	11.0817	11.0942	14.6784	16.5129	25.9907	12.3008	10.7777	16.9958	11.3163	14.9022
ENSG00000254156.1	0	0	0	0	0	0	0	0	0	0	0	0	0	0	0	0	0	0	0	0	0	0	0	0	0	0	0	0	0	0	0	0	0	0	0	0	0	0	0	0	0	0	0	0	0	0	0	0	0
ENSG00000271373.1	0	0	0	0	0	0	0	0	0	0	0	0	0	0	0	0	0	0	0	0	0	0	0	0	0	0	0	0	0	0	0	0	0	0	0	0	0	0	0	0	0	0	0	0	0	0	0	0	0
ENSG00000237224.4	0	0.0107252	0	0	0	0	0	0.00840085	0.00976665	0	0	0	0	0	0	0	0	0	0	0.0189912	0	0	0	0	0	0	0	0	0	0	0	0	0	0	0.0100262	0	0	0	0	0.163281	0.0180468	0	0	0	0	0	0	0	0
ENSG00000201727.1	0	0	0	0	0	0	0	0	0	0	0	0	0	0	0	0	0	0	0	0	0	0	0	0	0	0	0	0	0	0	0	0	0	0	0	0	0	0	0	0	0	0	0	0	0	0	0	0	0
ENSG00000244329.1	0	0	0	0	0	0	0	0	0	0.0525209	0	0	0	0	0	0	0	0	0	0	0	0	0	0	0	0	0	0	0.0449835	0	0	0	0	0	0	0	0	0	0	0	0	0	0	0	0	0	0	0	0
ENSG00000236352.1	0	0.0569016	0.0319556	0.275808	0.0232182	0	0.0723183	0.0891402	0.103633	0	0.0629512	0.0167823	0.0951626	0.0883341	0.0217483	0.0593616	0.0607879	0.0499205	0	0.0251891	0.241231	0.0242483	0	0.0386612	0	0.0431873	0.0787589	0.0319667	0.0365363	0	0.051876	0	0	0.0485736	0.0265965	0.0572044	0.0537318	0.0726421	0.0582783	0	0	0.0656913	0	0	0	0	0	0.023427	0.0168239
ENSG00000208032.1	0	0	0.291224	0	0	0	0.219689	0	0	0	0	0	0	0	0	0	0	0	0	0	0	0	0	0	0	0	0	0	0	0	0	0	0	0	0	0	0	0	0	0	0	0	0	0	0	0	0	0	0
ENSG00000214100.7	0.0925405	0.16045	0.315377	0.0648098	0.26188	0.0244897	0.237908	0.282775	0.474859	0.150359	0.118339	0.0946447	0.31306	0.166055	0.153314	0.223182	0.114272	0.140765	0.142365	0.142055	0.151159	0.205124	0.267955	0.190778	0.0790332	0.213112	0.305364	0.0450695	0.103024	0.264068	0.0731393	0	0.160918	0.20545	0.224989	0.201629	0.113634	0.238974	0.123249	0	0.0674957	0	0	0	0.0686878	0.154445	0	0	0
ENSG00000252735.1	0	0	0	0	0	0	0	0	0	0	0	0	0	0	0	0	0	0	0	0	0	0	0	0	0	0	0	0	0	0	0	0	0	0	0	0	0	0	0	0	0	0	0	0	0	0	0	0	0
ENSG00000238269.7	0	0.0496065	0	0	0	0.0908582	0.0420312	0.038856	0	0	0	0	0	0.102679	0	0	0	0.0290136	0	0.0439195	0	0	0	0	0.0325798	0.0376504	0	0	0.0637044	0	0	0	0	0.0846925	0	0.0498705	0	0	0.0508067	0	0.083471	0.343616	0.0548282	0	0	0	0.480399	0	0.0293339
ENSG00000226208.1	0	0	0	0	0	0	0	0	0	0	0	0	0	0	0	0	0	0	0	0	0	0	0	0	0	0	0	0	0	0	0	0	0	0	0	0	0	0	0	0	0	0	0	0	0	0	0	0	0
ENSG00000148704.11	0.00501234	0.00869056	0	0	0	0	0	0.00680718	0	0.0065152	0.00320484	0	0.00484472	0	0.00332162	0.00604419	0.00309471	0	0	0.00384713	0.0122811	0.00370343	0	0.00295235	0.00285383	0.00329799	0.00601442	0.00244114	0	0.00408654	0	0	0	0	0.00406209	0	0	0.0036982	0.00890083	0	0.00731164	0.040132	0.00480267	0	0	0	0	0	0
ENSG00000221740.1	0	0	0	0	0.277363	0	0	0	0	0	0.250671	0	0.378936	0.70349	0	0	0	0	0	0.300908	0	0	0	0	0	0	0	0	0	0	0.309854	0	0	0	0	0.34168	0.320939	0	0	0	0	0.784744	0.375647	0	0	0	0.759549	0	0
ENSG00000249249.1	0.357284	0.557523	0.51024	0.433715	1.07848	0.340383	0.524872	0.339655	0.376072	0.572771	0.274132	0.267966	0.506492	0.769334	0.31569	0.459557	0.411774	0.37439	0.732862	0.438762	0.408521	0.47517	1.06409	0.406863	0.461092	0.70525	0.500164	0.382813	0.238656	0.582584	0.451807	1.37088	0.198809	0.405418	0.810736	0.705802	0.779949	0.685388	0.655607	0.104788	0.312708	0.19071	0.342338	0.118316	0.459667	0.318021	0.338409	0.306051	0.170946
ENSG00000253328.2	0	0.341024	0.0957584	0.275497	0.139152	0	0.0722366	0.133559	0.155273	0	0.12576	0.15087	0.285165	0.0882343	0.325857	0.0592946	0.182158	0.448776	0	0.301928	0	0.217988	0	0.173779	0.111986	0.258831	0.413017	0.143688	0.109485	0.0801793	0.233178	0	0.136808	0.291112	0.0796995	0.0857096	0.24152	0.3628	0.523912	0.43265	0.717284	1.37796	0.18846	0	0	0	0.698614	0.0702015	0.504145
ENSG00000270504.1	0.309974	0.473678	0.255784	0.176613	0.683914	0.756351	0.41678	0.649293	0.282034	0.375597	0.167961	0.252543	0.192968	0.556218	0.271567	0.323103	0.298428	0.229093	0.290968	0.354855	0.248871	0.419238	0.452031	0.228998	0.251269	0.400995	0.403465	0.286577	0.263205	0.385506	0.365405	0.628948	0.241185	0.225504	1.08999	0.228942	0.455893	0.333366	0.569105	0.323586	0.628436	1.64054	0.332246	0.208777	0.545944	0.245513	0.156073	0.615058	0.592521
ENSG00000229526.2	0	0	0.0187078	0	0	0	0	0	0	0	0	0	0	0	0	0	0	0	0	0	0	0	0	0	0.0218781	0	0	0	0	0	0	0	0	0	0	0	0	0	0	0	0	0	0	0	0	0	0	0	0
ENSG00000237705.1	0.0234341	0	0	0.0656474	0	0	0	0.0318255	0.0739994	0	0	0	0	0	0	0	0	0.023764	0	0.107918	0	0	0	0	0.0266849	0.0308381	0	0.022826	0.0521779	0.0382115	0	0	0.0325996	0	0.0379828	0.0408471	0	0	0	0	0	0	0	0	0	0	0.0302674	0.100369	0
ENSG00000214946.12	0	0	0	0	0	0	0	0	0	0	0	0	0	0	0	0	0	0	0	0	0	0	0	0	0	0	0.00324129	0	0	0	0	0.00621875	0	0.00399805	0.00437828	0	0.00442262	0	0.00479683	0	0	0.021628	0	0	0	0	0	0	0
ENSG00000259276.1	0	0.0885581	0	0	0	0	0	0.104049	0	0	0	0	0	0	0	0	0.0315355	0.0258977	0	0	0.0834304	0	0	0	0.0290809	0.067214	0	0	0	0	0	0	0.0355266	0	0	0	0	0	0	0	0	0	0	0	0.151645	0	0	0	0
ENSG00000070423.16	10.8461	17.1147	11.1549	8.28755	5.78876	12.7812	13.3857	10.2332	14.2749	13.1489	9.47644	11.8099	14.927	9.44822	9.11783	15.8007	12.8295	10.0731	13.8324	10.1145	10.2273	13.2316	10.1881	13.9453	7.80539	11.7175	10.8338	10.7101	9.58966	8.31505	14.5537	7.97614	13.3277	14.4133	8.95126	11.1234	6.98354	10.4577	12.7837	31.3238	18.6783	25.4975	15.1871	32.0287	24.33	35.3999	20.3701	17.25	15.9826
ENSG00000202172.1	0	0	0.269036	0.387007	0.195475	0	0	0	0	0	0.176663	0	0	0	0	0	0	0	0	0	0.225659	0	0	0	0	0	0	0	0	0	0	0	0.192182	0	0	0	0	0	0	0	0	0.553058	0.264742	0	0	0	0	0	0
ENSG00000207614.1	0	0.571602	0.160504	0	0	0	0	0	0.260259	0	0	0	0	0	0	0	0.203547	0	0	0	0	0	0	0.388369	0.187704	0	0	0	0.183512	0.537566	0.260559	0.379485	0	0	0.267174	0	0	0	0	0	0	0	0	0	0	0	0	0	0
ENSG00000169228.12	2.67636	2.37499	3.13267	2.65657	2.00776	3.13793	4.24132	2.92876	4.80238	2.83053	2.64995	3.08206	4.54906	2.45796	2.26238	3.48144	3.33088	2.43621	4.50635	2.31837	2.45548	3.85112	3.59145	3.20249	1.94376	3.1337	2.86583	2.37427	1.90817	1.86703	5.15213	1.92444	3.93811	4.11716	2.7781	2.21621	1.65614	3.02679	4.64036	6.86059	5.14395	7.14288	8.11725	4.67567	3.48292	3.93914	5.74315	4.82385	3.78109
ENSG00000277895.1	0.0221292	0.095921	0	0	0	0.0117125	0	0.0300534	0.0524092	0.0287643	0.0424477	0.0113162	0.0213892	0	0	0	0.0409889	0.0224407	0.0170218	0	0	0.0163505	0.0183075	0.0130345	0.025199	0.0145605	0.0132767	0.0323325	0.0123181	0.0360838	0	0	0.0461765	0	0.0179339	0.0192863	0.0181155	0.0326548	0.0392967	0	0.193683	0.0885905	0.0212036	0	0.0657013	0.110798	0.0714552	0.0315934	0.0453769
ENSG00000130385.5	0	0.0639962	0.01198	0	0	0	0	0	0	0.0479771	0	0	0	0	0	0	0	0	0.0189276	0	0	0	0	0.0289877	0	0.0161906	0	0	0	0	0.019448	0	0.0171155	0	0	0	0	0	0	0	0	0	0	0	0	0	0	0	0
ENSG00000115520.7	13.6957	14.2107	11.6492	17.8397	9.67428	13.3186	11.4065	9.08284	14.5646	18.7649	13.3364	18.5254	16.2046	11.934	9.16073	12.8073	11.6673	10.2677	14.3223	10.5201	17.7054	8.58363	21.9731	15.1044	10.7409	9.21478	11.5228	11.9647	11.6105	9.65407	12.5428	12.6242	10.4454	15.4199	9.75177	22.0332	16.595	12.2675	12.236	2.39134	10.028	7.33889	7.08734	16.1473	13.0056	8.20021	9.884	9.06894	13.4626
ENSG00000265411.1	0	0	0	0	0	0	0	0	0	0	0	0	0	0	0	0	0	0	0	0	0	0	0	0	0	0	0	0	0	0	0	0	0	0	0	0	0	0	0	0	0	0	0	0	0	0	0	0	0
ENSG00000175003.11	0.0752892	0.0761477	0.0916373	0.158184	0.0443877	0.0796975	0.119822	0.153374	0.118873	0.0652422	0.0722088	0.0449173	0.0363857	0.0788079	0.0332622	0.0907884	0.12396	0.0954362	0.0965209	0.105942	0.256209	0.101985	0.0519055	0.125649	0.0500111	0.0990766	0.135512	0.0733354	0.0908036	0.112535	0.198349	0.115553	0.113464	0.130006	0.0813541	0.207786	0.0719058	0.0833248	0.0445657	0	0.091522	0.100469	0.372722	0.124661	0.186277	0	0.243108	0.071659	0.900571
ENSG00000221431.1	0	0	0	0	0	0	0	0	0	0	0	0	0	0	0	0	0	0	0	0	0	0	0	0	0	0	0	0	0	0	0	0	0	0	0	0	0	0	0	0	0	0	0	0	0	0	0	0	0
ENSG00000235126.1	0.0259959	0.0450726	0.10125	0	0	0.027518	0.0381896	0	0.0820889	0.0337903	0.0664861	0.132935	0	0	0	0	0.0321007	0.0263618	0.0799844	0.0399053	0.0424628	0.0384148	0	0.0612481	0	0	0.218351	0.0253213	0	0.0423887	0.0410917	0	0	0	0	0	0.0425618	0	0.0923262	0.457461	0	0	0.099634	0	0	0	0	0	0
ENSG00000227148.1	0	0	0	0	0	0	0	0	0	0	0	0	0	0	0	0	0	0	0	0	0	0	0	0	0	0	0	0	0	0	0	0	0	0	0	0	0	0	0	0	0	0	0	0	0	0	0	0	0
ENSG00000257308.1	0	0	0	0	0	0	0	0	0	0	0	0	0	0	0	0	0	0	0.0125439	0	0	0	0	0.00960552	0	0	0	0	0	0	0	0	0	0	0	0	0	0	0	0	0	0	0	0	0	0	0	0	0
ENSG00000164403.13	10.8169	10.2594	11.7405	11.5472	1.56026	6.96535	12.2218	10.5943	18.7212	7.89606	9.98826	17.1549	11.8382	10.1408	9.94769	13.0556	13.4179	11.2221	8.13864	9.22929	13.4232	15.9845	3.41011	16.1024	7.59751	11.1985	12.1564	10.4627	9.95981	5.11053	12.9171	4.38967	18.3712	23.8302	4.61184	5.63463	8.48963	9.29819	9.94228	8.28739	7.19053	10.4712	11.899	9.03122	12.092	6.22212	32.9652	3.40628	13.7485
ENSG00000225622.1	0	0	0	0	0	0	0	0	0	0	0	0	0	0	0	0	0	0	0	0	0	0	0	0	0	0	0	0	0	0	0	0	0	0	0	0	0	0	0	0	0	0	0	0	0	0	0	0	0
ENSG00000278959.1	0.0644438	0.0507885	0.0741586	0.0328237	0.165791	0.0496124	0.0344262	0.103433	0.138749	0.0380755	0.0224753	0.0299587	0.169878	0.105126	0.0854123	0.049452	0.0434059	0.0712919	0.0360511	0.161878	0.0191391	0.0779156	0.058161	0.0690155	0.0933971	0.0693857	0.126536	0.0399455	0.0587002	0.143293	0.0555634	0.0944115	0.0570493	0.121395	0.0854613	0.0204235	0.143878	0.0345803	0.145649	0.154643	0	0	0.0561346	0	0.0695755	0.0977759	0.0227006	0.0250922	0.0240263
ENSG00000242136.1	0.106529	0	0	0	0	0	0	0.0241126	0.0840984	0.0230783	0.0454091	0.0181586	0.0343222	0	0.0235319	0.0214099	0.0438486	0.0180048	0.0273141	0.0272548	0.0290015	0.183658	0	0.0209158	0.0202178	0	0.0639133	0	0	0.0868528	0.0561302	0	0	0	0.115111	0	0	0.0261998	0.0315288	0	0	0.0710784	0.0680487	0.529162	0	0	0	0.481615	0.0364071
ENSG00000268053.1	0	0	0	0	0	0	0	0	0	0	0	0	0	0	0	0	0	0	0	0	0	0	0	0	0	0	0	0	0	0.0123449	0	0	0	0	0	0	0	0	0	0	0.0220876	0	0	0	0	0	0	0	0
ENSG00000233396.6	0.100324	0.0102321	0.103433	0.0991922	0.150304	0.0499757	0.0693566	0.192351	0.12113	0.0230126	0.0528264	0.0301781	0.102673	0.222381	0.0782162	0.0355816	0.167608	0.083783	0.163418	0.0815316	0.0867568	0.113369	0.185525	0.0695209	0.0268803	0.0931917	0.127463	0.0919726	0.0657	0.13472	0.0279852	0.24455	0.057467	0.0698764	0.114783	0.0925789	0.106283	0.191584	0.188634	0.155775	0.154954	0.283504	0.248801	0	0.210255	0.196984	0.243913	0.244334	0.411438
ENSG00000252888.1	0	0	0	0	0	0	0	0	0	0	0	0	0	0	0	0	0	0	0	0	0	0	0	0	0	0	0	0	0	0	0	0	0	0	0	0	0	0	0	0	0	0	0	0	0	0	0	0	0
ENSG00000271057.1	0.0951195	0.0824606	0.0926188	0	0	0.0503444	0	0	0.0750912	0	0	0	0	0	0	0	0	0.144687	0	0	0	0	0.0786922	0.056027	0	0.0625861	0.0570679	0	0.0529478	0.0775505	0	0	0	0.140784	0.0770864	0	0	0	0.168911	0	0	0	0	0	0	0	0	0	0
ENSG00000253719.3	14.2272	15.4627	14.3305	14.8884	14.6622	12.3159	12.7904	16.8916	15.1561	12.1352	12.2095	10.8867	16.3439	15.6127	16.8059	14.023	15.4081	16.8649	18.4653	15.1923	12.5607	16.0174	17.3191	14.7196	16.7895	14.1283	17.1814	16.1398	14.6348	14.7784	12.9602	18.1071	15.4953	16.3393	14.5137	17.1677	17.0875	20.1779	20.3999	15.0392	11.3702	18.6646	14.0232	18.3073	13.6213	12.6905	18.2847	18.5497	25.0408
ENSG00000233947.1	0.0696274	0	0.022599	0.0325086	0.0328398	0.135124	0.0511435	0.03152	0.0916112	0.558108	0.163237	0.0949475	0	0.0208233	0.0615217	0.0419805	0.0429892	0.0235358	0	0	0	0.0514451	0.192009	0.0136706	0.0132144	0.015271	0	0.0339103	0.0775155	0	0.128403	0.0534315	0.0322866	0	0.0564272	0.0202275	0	0.0513725	0.0206072	0.204211	0.0677117	0.0929137	0.0222383	0.115287	0.103361	1.31699	0.0149884	0	0
ENSG00000271443.1	0.0659351	0	0	0.046177	0.699711	0.0174489	0	0.0223864	0	0	0	0	0	0.118314	0.0436944	0.0198772	0	0.0167158	0.101435	0.0253036	0	0.048717	0.27274	0	0	0.108459	0.0988961	0	0.0183512	0.591323	0.0260559	0.189743	0.0229308	0.0487944	0.400762	0.114929	0.107952	0.0486482	0.117086	0	0.0480907	0	0	0	0	0	0.0212904	0	0.118302
ENSG00000230112.1	0	0	0	0	0	0	0	0	0	0	0	0	0	0	0	0	0	0	0	0	0	0	0	0	0	0	0	0	0	0	0	0	0	0	0	0	0	0	0	0	0	0	0	0	0	0.260315	0	0	0
ENSG00000199673.1	0	0	0	0	0	0	0	0	0	0	0	0	0	0	0	0	0	0	0	0	0	0	0	0	0	0	0	0	0	0	0	0	0	0	0	0	0	0	0	0	0	0	0	0	0	0	0	0	0
ENSG00000251947.1	0	0	0	0	0	0	0	0	0	0	0	0	0	0	0	0	0	0	0	0	0	0	0	0	0	0	0	0	0	0	0	0	0	0	0	0	0	0	0	0	0	0	0	0	0	0	0	0	0
ENSG00000172731.12	2.25289	1.26273	1.87805	1.83842	7.6211	1.50374	2.11041	2.47269	2.00281	3.13123	2.01104	1.31371	2.07312	3.44662	1.96763	2.69737	1.66027	1.85446	3.37351	3.8576	1.58179	1.95728	3.73424	2.28629	2.05506	3.32803	1.79099	2.00733	2.28537	4.95243	2.2265	5.11284	1.48073	2.18545	5.02656	3.06899	3.68199	2.75168	2.90633	5.66861	8.38224	4.54957	5.32952	3.69712	6.15416	5.64995	7.77848	5.06739	8.18899
ENSG00000228521.2	0	0	0	0	0	0	0	0	0	0	0	0	0	0	0	0	0	0	0	0	0	0	0	0	0	0	0	0	0	0	0	0	0	0	0	0	0	0	0.070188	0	0	0	0	0	0	0	0	0	0
ENSG00000116266.9	9.39488	7.99525	8.70224	13.1868	6.483	8.81971	8.09736	9.10644	10.249	9.87688	9.01521	9.05485	10.8027	8.35405	9.29153	8.16585	9.11257	10.7972	10.0203	7.69814	10.1771	8.75963	10.8219	8.60354	9.30553	8.13742	9.42478	9.84856	9.3607	8.25745	8.40931	10.3838	7.85258	8.31102	6.68847	12.6357	10.0155	10.0472	9.86664	1.25575	10.0792	6.14696	7.65326	5.15808	8.86184	7.46608	7.73576	5.67358	11.1435
ENSG00000115363.12	0.311894	0.65076	0.257368	0.310988	0.0897589	0.464456	0.318404	0.423579	0.300474	0.295468	0.155482	0.129757	0.194163	0.170745	0.210192	0.184863	0.352499	0.230512	0.309036	0.113608	0.0604445	0.289035	0.551046	0.274009	0.186609	0.146087	0.133207	0.211115	0.235409	0.129298	0.25904	0.158211	0.250033	0.172132	0.342731	0.635794	0.173101	0.21062	0.197135	1.16282	8.17401	1.96815	4.65999	2.15322	8.06726	0.811682	0.402842	3.81887	4.90504
ENSG00000277990.1	0	0	0	0	0	0	0	0	0	0	0	0	0	0	0	0	0	0	0	0	0	0	0	0	0	0	0	0	0	0	0	0	0	0	0	0	0	0	0	0	0	0	0	0	0	0	0	0	0
ENSG00000207844.1	0	0	0	0	0	0	0	0	0	0	0	0	0	0	0	0	0	0	0	0	0	0	0	0	0	0	0	0	0	0	0	0	0	0	0	0	0	0	0	0	0	0	0	0	0	0	0	0	0
ENSG00000251396.5	0.0556904	0.045439	0.0574161	0.064239	0.139057	0.0346772	0.129938	0.115673	0.0982731	0.0212906	0.0335133	0.0469055	0.0823252	0.0529047	0.0824944	0.0869064	0.0930397	0.102983	0.15119	0.0754308	0.021404	0.0677725	0.124667	0.0656052	0.10818	0.0646638	0.129717	0.0382908	0.0583525	0.0908084	0.0880298	0.0829588	0.0410145	0.0969717	0.408847	0.0513909	0.101906	0.087013	0.255961	0.201766	0.324949	0.0655726	0.0941663	0.130179	0.0583567	0.0656079	0.351186	0.102892	0.335869
ENSG00000258271.1	0	0	0	0	0	0	0	0	0	0	0	0	0	0	0	0	0	0	0	0	0	0	0	0	0	0	0	0	0	0	0	0	0	0	0	0	0	0	0.0599047	0	0	0	0	0	0	0	0	0	0
ENSG00000249122.1	0	0	0	0	0	0	0	0	0	0	0	0	0	0	0	0	0	0	0	0	0	0	0	0	0	0	0	0	0	0	0	0	0	0	0	0	0	0	0	0	0	0	0	0	0	0	0	0	0
ENSG00000260092.1	0.218439	0.0946842	0.106348	0.267718	0.00965876	0.72259	0.310872	0.528423	0.689779	0.230696	0.157126	0.418886	0.989691	0.061245	0.253325	0.510352	0.236019	0.131524	0.535575	0.607763	0.200704	0.171484	0.180714	0.522699	0.178782	0.251523	0.245728	0.152929	0.281184	0.166962	0.0971118	0.251442	0.256394	0.545579	0.243412	0.0118985	0.312934	1.07782	0.678825	0	0	0	0.0130814	0	0.101335	0	0.00881673	0.0194912	0.0209962
ENSG00000166833.18	2.08379	1.74764	1.34101	1.57958	9.22525	1.08072	1.7344	2.87063	1.55522	1.95749	1.92324	0.991078	0.939531	2.57336	1.52111	1.83283	1.98531	1.76802	1.42016	4.1884	1.09709	1.92012	2.07234	2.06328	1.51258	2.97724	2.15311	1.46882	1.27881	5.55888	1.56805	3.61173	1.01763	2.3796	5.70031	0.742787	2.62903	2.02639	1.93702	1.9406	2.42826	2.6089	5.34347	0.723764	0.758528	0.206533	1.70018	0.5286	2.97139
ENSG00000087157.17	3.85943	4.58939	3.43935	3.52749	2.69944	2.71845	3.70829	4.52723	5.90906	4.65963	3.50071	3.08364	3.47903	3.87947	3.18683	3.16017	4.37252	4.14188	3.45634	5.31901	4.08505	5.25417	3.79474	3.86851	3.37013	4.49057	4.00349	3.506	3.70144	3.68728	4.80289	3.09397	4.18621	5.42252	4.28555	4.27771	3.32445	4.85874	4.82495	8.66301	5.77049	6.02348	6.3434	4.73105	5.58616	4.26162	5.04143	4.876	3.04934
ENSG00000199905.1	0	0	0	0	0	0	0	0	0	0	0	0	0	0	0	0	0	0	0	0	0	0	0	0	0	0	0	0	0	0	0	0	0	0	0	0	0	0	0	0	0	0	0	0	0	0	0	0	0
ENSG00000138035.13	3.5346	8.47004	2.99599	4.4799	2.91042	2.88318	4.45372	4.47029	5.15246	5.76594	4.74761	1.9852	4.63713	3.95456	3.08567	3.26057	4.62632	4.12874	4.75088	5.67306	3.12446	4.09587	6.08209	5.5818	3.95736	4.81123	4.25142	3.78139	3.83438	5.09086	4.45721	3.87025	3.03041	5.80439	3.92466	8.54467	3.89965	5.80784	4.631	2.85891	15.9915	8.93575	9.42117	10.7225	12.4487	7.57307	15.7942	7.33342	11.9204
ENSG00000202021.1	0	0	0	0	0	0	0	0	0	0	0	0	0	0	0	0	0	0	0	0	0	0	0	0	0	0	0	0	0	0	0	0	0	0	0	0	0	0	0	0	0	0	0	0	0	0	0	0	0
ENSG00000131115.14	1.39935	1.39918	1.60219	1.44297	1.72087	1.245	1.54705	1.13482	1.60848	1.22005	1.07953	1.25556	1.90851	1.44806	1.2592	1.10769	1.57602	1.85724	2.11754	1.2256	1.11717	1.89447	1.44887	1.34845	1.63257	1.38204	1.72375	1.37976	1.35717	1.72649	1.49273	1.89076	1.34156	1.37652	1.65586	1.23204	1.6492	1.82424	2.53067	0.528756	1.15213	1.79861	1.53001	2.53021	2.02209	1.75755	0.957291	2.02641	1.88654
ENSG00000260536.1	0.0632057	0.219176	0.030772	0	0.0447165	0.0669065	0	0.171677	0.199589	0	0.0404131	0.0969644	0.061092	0.113417	0	0.114326	0.0780487	0.0320477	0.0972359	0	0.103243	0.0467003	0	0.0372293	0	0.207939	0.265447	0	0.105549	0.154594	0.249773	0	0.0439633	0	0.153669	0	0.0517417	0.0466344	0.11224	0	0	1.01213	0.181685	0.313962	0.375313	0.73841	0.326545	0.0902372	0
ENSG00000168421.11	1.05588	1.46914	3.51613	1.59886	0.0776516	0.60184	2.28319	0.533641	1.64285	1.72343	1.26602	1.13602	1.42158	1.16595	0.808822	0.889418	1.78905	0.961664	1.61761	1.14908	1.29802	2.30963	1.31846	1.218	1.38233	1.04572	1.0062	1.39625	0.799144	0.31857	3.19232	0.849018	0.955822	1.21838	0.62621	1.34304	1.41246	4.07826	1.10708	1.23614	0.678859	0.193336	0.887614	1.09041	0.821197	1.97104	0.0963996	1.00601	0.162047
ENSG00000273591.1	0	0	0	0	0	0	0	0	0	0	0	0	0	0	0	0	0	0	0	0	0	0	0	0	0	0	0	0	0	0	0	0	0	0	0	0	0	0	0	0	0	0	0	0	0	0	0	0	0
ENSG00000236041.1	0	0	0	0	0	0	0	0	0	0	0	0	0	0	0	0	0	0.0662608	0	0	0	0	0	0	0	0	0	0	0	0	0	0	0	0	0	0	0	0	0	0	0	0	0	0	0	0	0	0	0
ENSG00000163833.7	0.00733971	0.00848389	0.0047645	0	0.0242324	0.00258982	0.0107825	0	0.00772569	0.00954039	0	0	0	0.00439014	0.00324263	0.00295023	0.00906333	0.00496202	0.0150552	0.0150226	0.00399633	0	0.00404809	0	0.00557191	0.00321956	0.00880708	0.00476616	0.00272374	0.0159574	0.0116019	0	0	0.00724221	0.00396548	0.00852904	0.00400564	0.0108308	0.00434458	0	0.0214133	0	0.00937692	0	0	0	0.00315998	0	0
ENSG00000250982.2	0.252661	0.0773068	0.144717	2.28992	0.105148	0.314653	1.98688	0.444057	0.375456	0.656834	0.399121	0.121603	1.35035	0.0266692	0.256078	0.197142	0.201879	0.271289	0.0228644	0.114074	1.52944	0.373364	2.50831	0.472728	0.473875	0.156465	0.178337	0.492209	0.281285	0.0242345	0.399381	0.0684318	2.35699	0.153982	0.289074	0.103624	1.99534	1.75453	0.131962	1.96155	0.130081	0.65449	0.512666	0.590608	0.0882525	2.03398	0.211159	2.14309	0.213332
ENSG00000273685.1	0	0	0	0	0	0	0	0	0	0	0	0	0	0	0	0	0	0	0	0	0	0	0	0	0	0	0	0	0	0	0	0	0	0	0	0	0	0	0	0	0	0	0	0	0	0	0	0	0
ENSG00000221586.1	0	0	0	0	0	0	0	0	0	0	0	0	0	0	0	0	0	0	0	0	0	0	0	0	0	0	0	0	0	0	0	0	0	0	0	0	0	0	0	0	0	0	0	0	0	0	0	0	0
ENSG00000267151.3	0	0	0	0	0	0	0	0.0778656	0	0	0.0366593	0	0	0	0	0	0	0.0290709	0	0	0	0	0	0	0	0	0	0	0	0	0	0	0	0	0	0	0	0	0	0	0	0	0	0	0.0851131	0.095689	0	0.0409278	0
ENSG00000256969.1	0	0	0	0	0	0.417824	0	0.0335034	0.0779007	0	0	0.0252305	0	0	0	0	0.0609257	0.0750505	0	0.0378693	0.0402963	0.0364549	0	0.0581232	0.0280917	0	0	0.0240294	0	0	0	0	0	0.146051	0	0	0.0403902	0.10921	0.0438078	0	0.0719724	0	0	0	0	0.0823446	0.127453	0	4.83096
ENSG00000261602.1	0	0	0	0	0	0	0	0	0	0	0	0	0	0	0	0	0	0	0	0	0	0	0	0	0	0	0	0	0	0	0	0	0	0	0	0	0	0	0	0	0	0	0	0	0	0	0	0	0
ENSG00000229224.1	0	0	0	0	0.204228	0.0381966	0	0.049005	0.170916	0	0	0.0369044	0.0697543	0	0.0478247	0.0435122	0	0.0731836	0.0555115	0.055391	0	0	0.119409	0	0	0.237422	0	0	0.0803436	0.176514	0	0.498428	0	0.106814	0.409402	0.0628963	0.295391	0.106494	0.0640771	0	0	0	0	0	0	0	0	0	0
ENSG00000230923.1	0	0.0152105	0	0.0122878	0	0	0	0.0119141	0	0	0.0056092	0	0	0.00787092	0	0	0	0	0	0	0	0	0	0	0.00499484	0	0	0	0.0048833	0	0.0138671	0	0	0	0	0	0	0	0	0	0	0	0	0	0	0	0.0113308	0	0
ENSG00000221036.4	0	0	0	0	0	0	0	0	0	0	0	0	0	0	0	0	0	0	0	0	0	0	0	0	0	0	0	0	0	0	0	0	0	0	0	0	0	0	0	0	0	0	0	0	0	0	0	0	0
ENSG00000272173.1	0.5157	0.733651	0.412014	0.407469	0.3742	0.615881	0.407936	0.700364	0.709841	1.06564	0.524192	0.473331	0.766852	0.735554	0.63092	0.462411	0.767431	0.576596	0.834039	0.588649	0.367185	0.801143	1.09394	0.389431	0.451721	0.835242	0.539466	0.502318	0.368028	0.474352	0.73156	0.456628	0.754188	0.782845	0.771567	0.691458	0.584535	0.85855	0.680958	0.698076	0.308622	0.264681	0.810877	0.656829	0.117777	2.07445	0.546525	0.415322	0.284702
ENSG00000252429.2	0	0	0	0	0	0	0	0	0	0	0	0	0	0	0	0	0	0	0	0	0	0	0	0	0	0	0	0	0	0	0	0	0	0	0	0	0	0	0	0	0.661247	0	0	0	0	0	0	0	0
ENSG00000229046.1	0	0.162261	0	0	0	0	0	0	0.07388	0	0	0	0	0	0	0	0	0	0	0	0.076433	0	0.154846	0	0.106567	0	0	0	0	0	0.0739651	0	0	0	0	0	0	0	0	0	0	0	0	0	0	0.156189	0	0	0.0479751
ENSG00000281555.1	0	0	0.27969	0.402334	1.2193	0.15203	0.210988	0.780198	0.680281	0	0	0.146887	0	0.773142	0	0	0.354696	0.291285	0	1.10234	0.703789	0.636697	0.237635	0	0	0.188998	0.344668	0.279788	0	0.702562	0	0.991922	0.399587	0.425139	0.465571	0	0	0.423865	0.510079	3.79104	0.419008	0	0.275227	2.85363	0	0	0.371001	0.615132	0.441751
ENSG00000269892.1	0.154551	0.421089	0.171986	0.309252	0.0937209	0.303829	0.162175	0.209893	0.453176	0.172192	0.0282338	0.203227	0.0853615	0.356563	0.321889	0.159743	0.245372	0.201505	0.135864	0.440599	0.288514	0.163131	0.0365314	0.104038	0.125707	0.464871	0.264927	0.258069	0.19664	0.180007	0.279199	0.203316	0.122856	0.0980344	0.107358	0.076969	0.253038	0.325802	0.117621	0	0.386482	0.441941	0.0846206	0	0.327757	0	0.427752	0.788031	0.701737
ENSG00000248334.5	0.0740866	0.0453366	0.0403129	0.085459	0.400816	0.0553584	0.0416145	0.0946973	0.0825698	0.104797	0.0362243	0.0423427	0.0842459	0.218962	0.0519843	0.0420415	0.0188351	0.0375647	0.150849	0.147177	0.0711859	0.0804997	0.176664	0.0539061	0.0471445	0.163446	0.0627516	0.0509393	0.0606469	0.266482	0.0309993	0.235775	0.0333439	0.0935281	0.218973	0.072165	0.20692	0.0900324	0.162517	0	0.0127144	0.0959564	0.0668118	0	0.0452862	0.0290934	0.0168865	0.0497748	0.0156386
ENSG00000256814.1	0	0	0	0.0694628	0	0	0	0	0	0.0322308	0	0	0	0	0	0	0.0306191	0	0	0	0	0	0	0	0.0282358	0	0	0	0	0	0	0	0	0	0	0	0	0	0.0440325	0	0	0	0	0	0	0	0	0	0
ENSG00000267683.1	0	0	0	0	0	0.0315299	0	0	0	0	0	0	0	0.0534479	0	0	0	0	0	0	0	0	0	0	0	0	0	0	0.0331603	0	0	0	0	0	0.0482779	0	0	0	0.0528932	0	0	0	0	0	0	0	0	0	0
ENSG00000238961.1	0.105114	0	0.204701	0	0.148731	0.111268	0.308838	0.142754	0.497887	0.273261	0	0	0.203197	1.1317	0	0	0	0	0.161708	0.806782	0.343395	0.155329	0	0.371483	0	0.553298	0.504514	0.307158	0.351067	0	0	0	0.146226	0.622305	0.681488	0.36644	0.172098	0.15511	0.186659	0	0	0.84161	0.402868	1.04426	0	0.701719	0.950354	0	0.21554
ENSG00000235182.1	0	0	0	0	0	0	0	0	0	0	0	0	0	0	0	0	0	0	0	0	0	0	0	0	0	0	0	0	0	0	0	0	0	0	0	0	0	0	0	0	0	0	0	0	0	0	0	0	0
ENSG00000255420.1	0	0	0	0	0	0	0	0	0	0	0	0	0	0	0	0	0	0	0	0	0	0	0	0	0	0	0	0	0	0	0	0	0	0	0	0	0	0	0	0	0	0	0	0	0	0	0	0	0
ENSG00000241159.3	0	0	0	0	0	0	0	0	0	0	0	0	0	0	0	0	0	0	0	0	0	0	0	0	0.0581618	0	0	0	0	0	0	0	0	0	0	0	0	0	0	0	0	0	0	0	0	0	0	0	0
ENSG00000240752.1	0	0	0	0	0	0	0	0	0	0	0	0	0	0	0	0	0	0	0	0	0	0	0	0	0	0	0	0	0	0	0	0	0	0	0	0	0	0	0	0	0	0	0	0	0	0	0	0	0
ENSG00000275094.1	0	0	0	0	0	0	0	0	0	0	0	0	0	0	0	0	0	0	0	0	0	0	0	0	0	0	0	0	0	0	0	0	0	0	0	0	0	0	0	0	0	0	0	0	0	0	0	0	0
ENSG00000130520.9	28.1063	35.131	29.7875	23.4772	12.5968	28.9307	35.4436	31.9726	31.9687	39.565	35.85	29.4066	45.8621	30.3602	25.4775	33.1532	35.712	31.9062	44.6976	28.1923	27.4568	31.7109	37.4081	38.6728	32.2833	34.1064	27.617	32.1956	35.9342	19.3971	35.8888	27.794	38.2065	31.896	25.9254	53.6822	25.7645	29.1362	34.0675	52.2493	62.9557	48.792	51.3926	62.9433	64.6506	72.0924	83.8801	44.9673	58.0947
ENSG00000224184.4	0.00374245	0.0129775	0.0473727	0.0104839	0.00529537	0	0.0109958	0	0.0118178	0.0243227	0.0191431	0.0267928	0.0217037	0	0.0148804	0.00451287	0.0092426	0.00379512	0.0172722	0.00574489	0.00611307	0.0110606	0.0371534	0	0.00426159	0.0196994	0	0.00729066	0.00833285	0.0122048	0.0414098	0.0258473	0	0.0221564	0.0121318	0.0326165	0.0122546	0.0938825	0.00664577	0.0329287	0.0109184	0.0149822	0	0	0.0111113	0.0499676	0.00966747	0	0.0115111
ENSG00000251439.1	0	0	0.146367	0	0	0	0	0	0	0	0	0	0	0.269732	0	0.0906316	0.0928092	0	0	0	0	0.111065	0	0	0	0	0.0901851	0	0	0	0.118804	0	0	0	0.12182	0	0.123054	0	0	0	0.219273	0	0.288061	0	0.223146	0	0.582452	0	0.0770585
ENSG00000197238.4	0.116668	0.202283	0.227202	0.217886	0.165079	0.205832	0.171393	0.369705	0.184205	0.202198	0.348116	0.318189	0.826953	0.418699	0.51543	0.187581	0.240109	0.23662	0.837584	0.0596975	0.381141	0.114935	0.193038	0.458129	0.354272	0.307058	0.233321	0.227281	0.346361	0.380476	0.245889	0	0.703294	0.287795	0.189099	0.338932	0.127343	0.114773	0.345295	1.02653	0.113458	0.155687	0.0745251	0.386349	0.230923	0.129809	0.502293	0.222085	0.279105
ENSG00000225017.1	0.00657856	0.0114061	0	0	0	0.00696374	0	0	0	0	0	0	0	0	0.00871906	0	0	0	0	0.0302955	0	0.0097213	0	0	0	0.0259711	0	0	0.0146477	0	0	0	0	0.0194735	0	0	0	0.00970758	0	0	0	0	0	0	0	0	0	0	0
ENSG00000238208.1	0.00385893	0	0	0	0	0.00408487	0.00566901	0	0	0	0	0	0	0	0	0.00465334	0	0	0.00593659	0	0	0.0114049	0	0.00454595	0	0	0	0	0	0	0	0	0	0	0	0	0	0	0	0	0	0.0154485	0	0	0	0	0	0	0
ENSG00000219039.2	0	0	0	0.169669	0.0856988	0	0.0444881	0.0411273	0.0956276	0.0393632	0.0387257	0	0	0.108681	0.0401368	0	0	0.214967	0	0	0.0989321	0	0	0.0356748	0	0.0398513	0.0726752	0	0	0	0	0	0	0	0.0490842	0.105571	0	0	0	0.266454	0.265051	0.121234	0.116066	0	0.269732	0.808662	0.117342	0.0432347	0.0620972
ENSG00000276795.1	0	0	0	0	0	0	0	0	0	0	0	0	0	0	0	0	0	0	0	0	0	0	0	0	0	0	0	0	0	0	0	0	0	0	0	0	0	0.0519544	0	0	0	0	0	0	0	0	0	0.0502656	0
ENSG00000257636.5	0	0	0.00846277	0	0	0	0	0	0	0	0	0	0	0	0	0	0	0	0	0	0.08518	0	0	0	0	0	0	0	0	0.0141719	0	0	0	0	0	0	0	0	0	0	0.0253564	0	0	0	0	0	0.527604	0	0.0089109
ENSG00000105835.10	13.725	17.6934	8.47244	15.9687	2.73771	7.19815	9.24312	14.6275	8.37247	20.8866	17.6764	9.05971	7.11799	7.7003	8.29658	6.74044	8.76111	9.07075	7.99506	6.90728	10.0443	7.53759	27.6746	8.87553	10.2642	9.89983	9.75213	9.74014	9.11229	7.60897	9.63385	9.64309	8.09931	8.76434	11.0451	18.3325	9.8604	6.35604	5.56798	5.26098	25.8062	5.46121	19.7586	13.3295	13.5118	12.9915	9.76841	7.17702	7.92674
ENSG00000240692.3	0	0	0	0	0	0	0	0	0	0	0	0	0	0	0	0	0	0	0	0.0732473	0	0	0	0	0	0	0	0	0	0	0	0	0	0	0	0	0	0	0	0	0	0	0	0	0	0	0	0.0681232	0
ENSG00000254635.4	5.02747	7.57164	7.20856	9.84481	6.47199	5.67662	6.76295	5.6563	6.07784	4.97162	6.60551	6.31633	6.76496	6.26185	7.46026	6.66273	7.43754	6.32281	5.94477	6.38583	7.68875	7.02133	4.30601	4.59867	6.17949	8.36714	7.63533	7.20627	6.41463	5.6902	5.86669	5.63954	5.10135	7.39725	7.63739	5.38677	8.68312	6.40047	8.77014	1.3444	5.09045	12.4311	3.60815	8.4712	5.06329	2.45137	19.7159	3.43398	14.0385
ENSG00000275479.1	0.168671	0.877343	0.574829	0.472509	0.119331	0.624915	0.867259	0.916279	0.266312	0.438488	0.32354	0.517519	0.815152	0.453996	0.335329	0.610182	0.312422	0.940749	0.64871	0.388381	0.551029	0.996998	0.697707	0.496751	0.864311	0.554906	0.50598	0.164294	0.563339	0.412551	0.799855	0.970776	1.64249	0	0.273388	1.17602	0.138078	0.497795	1.9469	0	2.21441	2.02574	0.808078	0	0.500782	0	1.41606	0.602019	1.38347
ENSG00000261037.1	0	0.00772672	0.00433928	0.0124841	0.00630564	0	0	0.0242089	0	0	0	0	0	0	0	0	0	0	0	0.0136818	0	0	0	0	0	0	0	0.0043408	0	0	0.0070443	0	0	0	0.00722315	0	0	0	0.00791367	0	0	0	0	0	0.0264622	0	0	0	0
ENSG00000197380.9	3.10354	1.60914	1.00644	1.65999	30.2838	3.82086	1.52639	2.54656	0.854423	2.52525	1.07955	1.08202	0.800282	7.60336	2.1804	4.20575	0.678263	1.02346	5.0409	4.47753	1.23753	1.19153	5.65891	1.38657	0.785688	5.106	2.3344	0.914543	1.43387	9.51675	0.590231	12.4522	0.959836	1.65797	7.0784	1.52338	8.69617	0.942292	1.99883	0.333304	0.663097	1.09405	0.523706	0.215047	0.947945	0.650278	0.171245	0.853719	0.196966
ENSG00000174373.14	2.046	2.76248	1.67278	2.18419	1.33532	1.17145	1.57273	2.64795	2.44999	1.78955	1.90181	1.41701	1.39731	1.56979	1.55804	1.43601	1.79459	2.01935	1.33574	2.16545	1.82731	1.84056	1.28645	1.85761	1.86037	1.95421	1.93018	1.76496	1.66665	1.85978	1.71645	1.63638	1.44061	2.0021	1.68381	1.16272	1.45737	2.06871	1.89139	0.269407	0.615735	1.8124	1.48158	1.06465	0.678556	0.660669	0.796596	0.705667	0.960841
ENSG00000236900.1	0	0	0	0	0	0	0	0	0	0	0	0	0	0	0	0	0	0	0	0.0869812	0	0	0	0	0	0	0	0	0	0	0	0	0	0	0	0	0	0	0	0	0	0	0	0	0	0	0	0	0
ENSG00000176438.11	0.757869	0.576008	0.962672	0.527969	0.944659	0.671212	0.797768	1.04877	1.53576	0.949808	0.497339	1.07077	1.06212	0.994506	0.717623	1.00826	0.863855	0.759628	0.570054	1.55321	0.735716	1.13998	0.393764	0.74039	0.601099	1.07298	1.29268	0.784874	0.625905	1.33083	1.04648	1.0553	0.426601	1.65714	1.53127	0.176784	1.14406	1.92557	0.926042	0.330251	0.407727	0.489147	1.70179	0.777506	0.18494	0.37852	0.769474	0.358003	0.114629
ENSG00000187730.7	0.0451423	0.143493	0.183148	0.0632299	0.0958111	0.0716781	0.0884224	0.153268	0.154428	0.283607	0.0481059	0.100032	0.130898	0.0945041	0.119661	0.0907256	0.0743244	0.0915554	0.092596	0.150142	0.0368686	0.200124	0.0497948	0.0443159	0.119944	0.138611	0.063195	0.168555	0.0921368	0.0736086	0.0118927	0.138567	0.156995	0.0890852	0.0609734	0.0655714	0.110864	0.122125	0.146965	1.32398	1.07555	0.843356	0.43254	0.373725	0.580782	0.527381	0.845432	1.10637	0.354837
ENSG00000168269.8	0.319979	0.250199	0.0122183	0.140608	0.0177551	0.0265658	0.0921704	0.434559	0	0.0815527	0.080232	0.0192503	0.0485143	0.236424	0.166311	0.0529599	0.15495	0.0890738	0.00965209	0.260041	0.0512419	0.0648998	0.0207622	0.0221733	0.328644	0.0165128	0.0301137	0.28723	0.216532	0	0.188432	0.0866644	0.13092	0.102147	0.0406771	0.0437445	0.041089	0.101841	0.0557072	0	0	0	0	0	0.0186277	0	0.00810361	0.295593	0.263739
ENSG00000232150.3	0.0929003	0.046021	0.129226	0.0371782	0.150228	0.182631	0.11698	0.28838	0.0628622	0.207008	0.118799	0.0814395	0.0256553	0.0238144	0.0703588	0.144032	0.131105	0.30954	0.0816675	0.0203725	0.0216782	0.254951	0.175671	0.0938055	0.272025	0.157181	0.0636989	0.155125	0.0886499	0.108202	0.146847	0.122213	0.184622	0.078571	0.129065	0.115665	0.17383	0.0783356	0.0471345	0	0	0.15939	0.203461	0	0.0788055	0.0442988	0.102848	0.0757894	0.0408206
ENSG00000234694.1	0.965585	1.40782	1.19662	1.47543	0.434717	0.998891	0.741491	1.13253	1.52454	0.541974	0.505134	0.718211	1.6969	0.511919	1.48336	1.72008	1.51752	1.6468	2.46451	0.808491	0.645229	1.49173	0.762516	1.1892	1.57433	1.53057	1.92227	0.855025	0.855094	0.679887	1.2141	1.06095	1.37377	1.39666	0.746957	1.41531	0.89824	0.777194	1.75364	2.51015	2.49693	1.66921	2.06066	1.09008	2.01979	2.93002	1.44556	0.939914	1.14748
ENSG00000180592.15	0.100765	0.0227881	0.040526	0.0429553	1.14991	0.111302	0.0225262	0.0475989	0.0276687	0.0825724	0.0420182	0.0604893	0.0423456	0.267288	0.150971	0.0950933	0.0054099	0.0466487	0.144907	0.252195	0.0250468	0.0582661	0.177598	0.0516105	0.0748321	0.0576526	0.10251	0.0490749	0.0585288	0.42148	0.0519386	0.468998	0.0304729	0.0810538	0.369251	0.0152729	0.286916	0.0678812	0.0972478	0.0770955	0.0447355	0.0526165	0.0293846	0.0652862	0.0260146	0.307095	0.0452686	0.0281463	0.020213
ENSG00000236111.5	0.191706	0.0369317	0.0829625	0.417695	0.120557	0.0676434	0.187752	0.28928	0.134525	0.0830616	0.190672	0.0653549	0	0.0764438	0.112925	0.154114	0.210422	0.259205	0.0983068	0.0326978	0.0347933	0.220335	0.317195	0.125464	0.242554	0.0280305	0.383386	0.0414957	0.0237138	0.0347326	0.168349	0.196151	0.148158	0.063053	0.0690495	0.0371282	0.0697488	0.15716	0.113476	0	0.124287	0.25582	0.163277	0.211613	0.126482	0.0710993	0.110047	0.0608207	0.3931
ENSG00000213676.9	29.9864	32.7712	32.6134	33.8409	16.7732	19.0512	37.2456	40.0943	39.0662	28.808	26.6588	29.1766	35.4729	32.7142	31.0025	38.1906	38.5993	35.3922	36.2111	29.9694	25.2285	41.354	24.0208	37.356	31.4292	32.8108	32.971	34.5009	31.3318	26.5029	37.6703	24.9457	34.7125	45.831	36.4747	25.0702	29.0055	42.4303	39.3001	34.872	35.3821	54.5011	32.879	29.5698	21.1218	24.4077	38.7816	41.0115	47.892
ENSG00000200999.1	0	0	0	0	0	0	0	0	0	0	0.23187	0	0	0	0	0	0	0	0	0	0	0	0	0	0	0	0	0	0	0.295661	0	0	0	0	0	0	0	0	0	0	0	0	0	0	0	0	0	0	0
ENSG00000169509.5	0	0	0	0	0	0.0877431	0	0	0	0.0269357	0	0	0	0	0	0	0	0	0	0	0	0	0	0	0	0	0	0	0	0	0	0	0	0	0	0.0361205	0	0	0	0	0.120914	0	0	0	0	0	0.0267651	0.0591698	0.0424922
ENSG00000005469.10	8.45172	5.9757	5.80691	9.32851	3.95327	11.6234	6.75802	5.17921	6.84002	7.13074	5.77836	6.2155	4.07187	7.20388	8.54897	3.8785	10.9869	7.05508	3.73347	3.02322	8.78957	7.73209	3.35505	6.04043	7.17912	5.01852	8.40746	9.86411	8.64376	3.30637	8.63931	5.84189	7.92332	6.32142	3.43297	8.08449	5.98626	3.45647	3.42488	0.743386	2.09941	2.49592	1.08311	1.50505	5.38881	0.330635	3.97364	0.619744	3.42311
ENSG00000162441.10	12.3356	11.018	10.9294	13.5695	7.63255	12.0961	10.4871	11.7185	11.5252	9.09682	13.6832	10.0408	11.2406	11.8128	11.3812	9.3407	12.2449	12.3144	13.1626	10.4243	10.8549	11.1243	12.3871	11.2229	15.5957	9.19595	11.961	12.6526	13.9065	10.2265	10.7834	10.8527	13.4985	9.21331	10.586	19.3569	11.6112	11.4687	11.976	2.42107	7.84597	5.84036	11.2226	9.38716	14.3968	6.51589	10.9503	10.918	12.3386
ENSG00000224099.1	0.0440012	0	0.0142815	0.0410877	0.0622595	0	0.0430936	0.0199191	0	0	0	0.0150006	0.0850594	0	0.0194394	0.0530593	0.0181114	0.0148735	0	0	0	0.0216739	0	0.0172783	0.0167017	0	0	0	0.0326574	0	0.0231842	0.0337661	0	0	0.0237729	0.0766967	0	0	0.0260455	0.258102	0.427905	11.0975	1.6021	0.874267	0.261277	2.98639	38.4941	0.209398	0.406018
ENSG00000241464.3	0.284426	0.493147	0.646213	0.531186	0.939046	0.301079	0.278559	1.5451	0.598766	0.616176	0.363718	0.0969644	0.549828	0.34025	0.502628	0.342978	0.585365	0.480715	0.145854	0.291074	0.619457	1.40101	1.09809	0.558439	0.323881	0.623816	0.455052	0.461742	0.527747	0.154594	0.449592	0	0.659449	0	0.922014	0.330514	0.776126	0.83942	0.336719	0	0	0.379549	0.545056	0	0.56297	0	0.857182	0	0.972045
ENSG00000281666.1	0	0	0	0	0	0	0	0	0	0	0	0	0	0	0	0	0	0	0	0	0	0	0	0	0	0	0	0	0	0	0	0	0	0	0	0	0	0	0	0	0	0	0	0	0	0	0	0	0
ENSG00000142207.6	2.05037	2.9998	2.06548	1.8827	2.47495	0.913719	2.33532	3.42056	2.53787	2.74574	1.62821	1.10027	1.24046	2.61177	2.01632	1.8864	2.42872	2.34234	1.79717	4.0703	1.48438	2.84098	1.7193	2.47653	2.59133	2.73149	2.41928	2.38796	1.94448	3.52286	1.76455	2.38638	1.45256	2.60572	3.19817	1.76048	2.03075	3.34497	2.08122	5.55695	6.2551	6.95171	12.1296	4.27509	4.12222	2.85163	7.38731	5.02513	2.96511
ENSG00000232724.1	0.0305598	0.0529856	0.0694316	0.0570727	0.0288271	0.291142	0.104753	0.0415028	0.056292	0.0264817	0.0260528	0.046882	0.0984594	0.0913944	0.0742559	0.0368509	0.10063	0.0413199	0.086191	0.0156371	0.0665569	0.060212	0	0.078001	0.0521986	0.0603226	0.0488925	0.0545724	0.0850548	0.0415255	0.0644078	0.035177	0.0283415	0.0527692	0.0495323	0.142047	0.041695	0.0450952	0.0361784	0	0.0742974	0.122341	0.039042	0.0505998	0.0604877	0	0.0723634	0.00727157	0.0261101
ENSG00000186480.11	12.8604	18.4046	13.0176	10.788	7.16965	17.3701	17.2463	39.1085	14.0303	15.6367	15.4496	16.059	8.21263	8.31506	6.78424	7.70123	10.3105	13.65	8.66336	13.2627	16.3263	7.89295	31.2541	25.6792	9.63471	11.5474	7.25795	12.6312	14.074	39.0111	11.05	9.75308	7.07652	11.9288	25.2377	7.91781	11.198	10.7319	6.88789	27.2048	18.6323	31.947	62.4653	58.1961	25.4038	79.2341	15.3067	15.9718	15.4142
ENSG00000188730.4	0.0731769	0.0890362	0.100004	0.035964	0.0617617	0.236461	0.0641237	0.104611	0.0972949	0.0200248	0.0197005	0.0472679	0.0719706	0.055288	0.064658	0.0758565	0.0586557	0.102848	0.0987505	0.0256194	0.0608136	0.149872	0.114706	0.045371	0.0453187	0.0726451	0.0924279	0.163814	0.0514529	0.0607075	0.0730552	0.0738886	0.0767947	0.0589039	0.0166467	0.017902	0.145032	0.070094	0.0683928	0	0.0149818	0	0	0.0127541	0.0533623	0	0.00165816	0.00549857	0.0236925
ENSG00000237371.1	0.38579	0.267558	0.300518	0	0.21835	0.490055	0	0.314362	0.243647	0.40117	0.0986682	0.0789125	0.149156	0.276906	0.30679	0.186084	0.38111	0.234732	0	0.829097	0	0.68411	0.127665	0.0908948	0	0.406144	0	0.0751558	0.171799	0	0.243927	0.177631	0.107336	0.1142	0.500241	0.403473	0	0.113857	0.274032	0	0.675316	0	0.443583	0	0.229081	0	0.0996572	0.220313	0.0791079
ENSG00000260948.1	0.164919	0.248645	0.286258	0.160695	0.608745	0.166985	0.115871	0.379782	0.532097	0.270289	0.0733549	0.176003	0.166335	0.283065	0.142552	0.242102	0.247919	0.239954	0.209588	0.396252	0.374798	0.233109	0.367788	0.253409	0.195962	0.424614	0.206494	0.0907962	0.311327	0.374144	0.124677	0.247613	0.109723	0.169804	0.139464	0.087489	0.586986	0.359751	0.267394	0.252361	0.0418386	0.287054	0.137409	0.56988	0.298043	0.167538	0.574199	0.30711	1.83055
ENSG00000207263.1	0	0	0	0	0	0	0	0	0	0	0	0	0	0	0	0	0	0	0	0	0	0	0	0	0	0	0	0	0	0	0	0.362986	0	0	0	0	0	0	0	0	0	0	0	0	0.936244	0	0	0	0
ENSG00000206744.1	0	0	0	0	0	0	0	0	0	0	0	0	0	0	0	0	0	0	0	0	0	0	0	0	0	0	0	0	0	0	0	0	0	0	0	0	0	0	0	0	0	0	0	0	0	0	0	0	0
ENSG00000176595.3	12.0175	15.3452	11.7963	13.0628	2.58167	15.4489	11.722	11.0038	10.564	7.7415	12.5341	10.7851	5.82974	9.50393	12.4264	10.834	12.8055	12.1428	5.66039	9.35155	13.3549	12.5099	2.99388	12.1859	13.6968	9.50455	14.0257	12.4932	14.0817	6.79272	9.72525	8.16702	9.65651	9.91886	4.70577	5.82934	8.71757	7.60507	6.60674	2.11134	2.42818	1.98186	5.99456	5.34769	5.18604	4.40891	1.97687	10.9936	3.09636
ENSG00000249186.1	0	0	0	0	0	0	0	0	0	0	0	0	0	0	0	0	0	0	0	0	0	0	0	0	0	0	0	0	0	0	0	0	0	0	0	0	0	0	0	0	0	0	0	0	0	0	0	0	0
ENSG00000198987.1	0	0	0	0	0	0	0	0	0	0	0	0	0	0	0	0	0	0	0	0	0	0	0	0	0	0	0	0	0	0	0	0	0	0	0	0	0	0	0	0	0	0	0	0	0	0	0	0	0
ENSG00000270665.1	0.0626597	0.0271604	0.0305062	0.0438831	0	0.0165821	0.0230127	0.0850972	0.0741991	0.101809	0.060096	0.0160211	0	0.0281092	0	0	0.0193436	0.111198	0	0.0480933	0.0255877	0.0925938	0	0.0553614	0.0356759	0.0206142	0.0375933	0.0762921	0.0174396	0	0	0	0.0217917	0	0	0.0273049	0	0.0231158	0.0278175	0.413493	0	0	0.0900579	0	0.0465089	0.209152	0.0202328	0.0447288	0.112425
ENSG00000212124.2	0.0289535	0.100401	0.0281924	0.162219	0.0614517	0.0459732	0.0638018	0.0786427	0.0685713	0.0564521	0	0.0296119	0.139926	0.0259772	0.0383743	0.017457	0.0715057	0.0734027	0.0222711	0.155559	0.0472939	0.064178	0	0.0170541	0.0494549	0.0762027	0.121597	0.0705054	0.0161168	0.0472114	0.0228834	0	0.0201389	0.06428	0.140787	0.0757016	0.0948082	0	0.0257076	0.127377	0.0844706	0.11591	0.0832272	0	0	0.144966	0.186982	0.0206681	0.118741
ENSG00000197595.3	0.00647288	0	0	0	0.0091588	0	0	0.00879071	0	0	0.00827739	0	0	0	0	0	0	0	0	0	0	0	0	0	0	0	0	0	0	0	0	0	0	0	0	0	0	0	0	0.056953	0	0	0	0	0	0	0	0	0
ENSG00000155304.5	5.87976	6.78236	5.88347	7.68339	5.48602	3.52573	6.12771	6.58545	7.2957	8.11924	5.79842	3.83093	6.17121	6.1256	5.56963	5.6221	6.0775	6.17296	7.0448	6.5145	4.38971	6.83849	11.1822	5.04416	6.98291	4.48773	6.50743	6.26284	5.17509	5.27312	7.85081	9.15687	4.73445	4.64815	6.37396	11.5871	6.61406	7.181	6.4981	2.31283	10.5446	6.90927	6.35626	14.5002	7.6605	8.01205	3.74354	6.54762	3.30495
ENSG00000125962.13	1.87561	2.10484	2.0305	2.48233	1.46278	2.13238	1.76605	1.91745	2.68155	2.5762	1.68839	1.42888	2.60942	1.95576	2.26666	1.8735	2.27595	2.43817	2.65825	1.81819	2.01674	2.26096	2.32143	2.51574	2.12907	1.78411	2.69007	2.22973	2.31171	1.8591	2.01231	2.27799	1.90245	2.14214	1.77616	2.5897	2.1907	2.5498	3.0422	1.58532	3.95536	4.42244	2.3264	2.52358	5.01618	2.59297	2.0067	3.17115	2.5196
ENSG00000259838.1	0.131076	0.227263	0	0.122397	0	0.0925003	0.0641861	0.118675	0.275937	0.227169	0.111745	0.0446854	0.0844616	0.078401	0.0579082	0.105373	0.0539523	0.221535	0.0672158	0.0670698	0	0.129129	0	0.102941	0	0.229985	0.157281	0.0425581	0.0486418	0.0712437	0.0690638	0	0.121561	0	0	0.228473	0	0.128947	0	0	1.01975	0	0	0	0	0.583357	0.112865	0.0623778	0.134388
ENSG00000254482.1	0	0	0	0	0	0	0	0	0	0	0	0	0	0	0	0	0	0	0	0	0	0	0	0	0	0	0	0	0	0	0	0	0	0	0	0	0	0	0	0	0	0	0	0	0	0	0	0	0
ENSG00000234120.1	0	0	0	0	0	0	0	0.10765	0	0.103033	0	0.0810686	0.459692	0.142236	0	0	0	0.0803819	0.121943	0.121679	0	0	0	0.0933783	0	0.312931	0	0	0.176493	0.129251	0	0	0	0.469279	0	0	0	0.116968	0.281519	0	0	0	0	0	0.23534	0.264583	0	0	0.0812693
ENSG00000220949.2	0	0	0	0.0293823	0	0	0	0	0	0	0	0	0	0	0	0	0	0	0	0	0	0	0	0	0	0	0	0	0	0	0	0	0	0	0	0	0	0	0	0	0	0	0	0	0	0	0	0	0
ENSG00000280222.1	0	0.0116563	0.00218204	0	0.0126834	0.0118608	0.00329211	0.0273907	0.0283056	0.00291287	0.00573138	0.00229191	0.0129961	0.00804237	0.00297011	0.00540457	0.00830164	0	0.0172375	0.01376	0	0	0.0259552	0.00527985	0	0.00884695	0	0.00654841	0	0	0.00708456	0.00515908	0.00311743	0.00663357	0.0145289	0.00390612	0.003669	0.0165342	0.0119384	0.0197175	0.00653789	0	0.0128833	0	0	0.0149602	0.00289441	0	0.00229759
ENSG00000115207.12	9.60423	10.7597	9.59122	8.59482	5.691	9.26983	9.70784	9.80445	12.6693	10.6207	9.73069	8.7123	9.66244	9.21429	10.5726	10.476	11.786	11.1225	9.79534	9.57576	8.73266	11.2041	7.04537	11.3697	10.1784	9.00006	10.943	10.6254	9.53069	7.97612	9.85652	8.00695	9.78717	12.1338	8.78203	8.95063	8.41542	12.3981	11.77	9.63959	10.473	10.5421	13.3634	12.2414	12.0373	11.3355	10.5983	12.1973	14.0012
ENSG00000213333.3	0	0	0.0325822	0	0.0236734	0	0	0.022722	0	0.0434948	0.0213952	0.0171114	0	0	0.0221748	0.0605256	0.0413199	0.0339329	0.0257389	0	0	0.0247237	0	0.0197096	0	0.022017	0	0	0	0	0.0793397	0	0	0	0.027118	0	0	0	0	0.147211	0	0	0.0961864	0	0	0	0.0216096	0.0238863	0.0343075
ENSG00000278180.1	0	0	0	0	0	0	0	0	0	0	0	0	0	0	0	0	0	0	0	0	0	0	0	0	0	0	0	0	0	0	0	0	0	0	0	0	0	0	0	0	0	0	0	0	0	0	0.0241437	0	0
ENSG00000185127.6	10.1491	13.6361	10.7455	11.4426	6.76466	10.1791	10.2754	13.1703	13.8087	9.93298	10.2868	9.01147	13.027	9.8573	10.8491	10.2708	13.8018	11.5605	14.9942	10.3696	10.5722	12.506	13.292	12.0777	10.7023	7.96618	11.9301	12.5717	10.7237	8.33661	10.5146	12.5089	10.8651	10.4329	9.8559	14.8558	10.1516	11.8945	15.1444	10.1454	18.9622	7.46846	11.9655	9.29383	15.6153	16.5389	8.66879	5.62968	8.92226
ENSG00000223804.4	0.511042	0.272634	0.688994	0.587328	2.74407	1.53967	0.924002	0.925383	0.931008	0.732398	0.469187	0.670079	1.24121	1.38728	1.1115	0.67945	0.728137	0.425218	2.19729	1.02586	0.684928	0.697088	3.36059	0.586588	0.477483	1.31052	0.943399	1.04661	0.933641	1.6666	1.40848	2.02118	0.54686	0.44607	1.35928	0.936457	1.9523	0.831458	1.44269	0.807066	1.07042	1.83603	1.43133	0.781075	0.622471	1.00599	1.35397	1.55274	0.994173
ENSG00000234337.4	0.431835	0.272265	0.191128	0.494887	0.0833215	0.270116	0.317196	0.613126	0.340908	0.995054	0.426717	0.140526	0.0758897	0.140888	0.182109	0.331376	0.315099	0.378198	0.21138	0.0903945	0.0961877	0.493103	0.259823	0.300605	0.268221	0.0516611	0.471061	0.210314	0.262231	0.224046	0.80671	0.045189	0.354978	0.203365	0.0954453	0.171071	0.128549	0.231721	0.174283	0.518126	0.400864	0.235742	0.225693	0.975023	0.174833	1.04831	0.177468	0.112094	0.100624
ENSG00000271776.1	0	0	0	0	0	0	0	0	0	0	0	0	0	0	0	0	0	0	0	0	0	0	0	0	0	0	0	0.00404735	0	0	0	0	0	0	0	0	0	0.00613154	0	0	0	0	0	0	0	0	0	0	0
ENSG00000207205.1	0	0.457282	0	0	0	0	0	0.238788	0	0.114273	0	0	0	0.157752	0.116518	0	0	0	0.135246	0.269905	0	0	0.290923	0	0	0.115689	0.105489	0	0.0978731	0	0	0.404784	0	0.130118	0.284986	0	0	0	0	0.773525	0	0	0	0.873384	0	0	1.02194	0.125512	0
ENSG00000068724.14	8.69425	5.76192	8.93927	6.84182	3.7659	15.0766	9.347	7.58913	8.68454	11.4421	7.70921	10.5401	7.98988	5.99318	9.48688	10.9447	11.3855	8.68114	7.1324	7.55911	7.05474	9.28181	4.63858	8.82322	6.65091	7.21632	9.10738	10.0729	6.96485	6.81778	8.51966	6.66548	6.43502	8.79296	8.00854	4.07882	6.56195	10.892	8.13286	10.01	4.42138	5.10598	9.09661	9.00029	5.32995	6.71687	7.03156	7.68893	3.92086
ENSG00000110680.11	0	0.0236377	0.0132748	0.0190957	0.212193	0.0144314	0	0.00925751	0.0215252	0.177209	0	0.0069716	0	0.0489269	0.0903456	0.0575391	0.0168347	0	0.0104867	0.0104639	0.0111345	0.0201461	0.214296	0.0240905	0	0	0	0	0.00758885	0.0111151	0	0.125544	0	0.0302672	0.0662914	0	0.0781232	0.0100588	0.0242096	0.0599773	0.178984	0.027289	0.0522516	0	0.12143	0	1.54956	0	6.22008
ENSG00000260625.2	0.0442923	0.230386	0.150947	0.0620393	0.407364	0.210985	0.16267	0.360916	0.174831	0.115145	0.11328	0.226497	0.128433	0.119217	0.14676	0.267052	0.164081	0.157205	0.476975	0.0339957	0.0723488	0.261807	0.183215	0.130444	0.100873	0.204002	0.212589	0.0647143	0.14793	0.252779	0.105019	0.407874	0	0.295001	0.430742	0.656235	0.652657	0.163399	0.35394	0	0.323052	0.0886581	0.127319	0	0.0657515	0.0739216	0.286039	0.12647	0.227058
ENSG00000207513.1	0	0	0	0	0	0	0	0	0	0	0	0	0	0	0	0	0	0	0	0	0	0	0	0	0	0	0	0	0	0	0	0	0	0	0	0	0	0	0	0	0	0	0	0	0	0	0	0	0
ENSG00000012232.7	2.48419	2.77378	2.30883	1.93035	4.96043	1.80265	2.52752	2.94159	2.3076	2.64854	1.84374	1.49478	1.70538	3.24084	2.44755	2.54969	2.53643	2.1731	2.11847	3.32829	1.66863	2.49378	2.05698	2.46241	2.01414	2.65394	2.67669	2.14291	2.16461	3.97376	1.88533	3.63249	1.74469	2.6439	3.82726	1.83417	2.88515	2.36073	1.90757	3.9197	3.2044	2.67513	3.49051	4.02239	4.19596	2.52714	0.800725	7.2765	2.41422
ENSG00000008226.18	0.161793	0.295604	0.182949	0.263172	0.0516937	0.197048	0.283688	0.196102	0.469702	0.0791466	0.260291	0.284683	0.198421	0.259105	0.20752	0.220274	0.410317	0.227582	0.208757	0.194951	0.542768	0.311069	0.0316637	0.237735	0.194142	0.222069	0.279727	0.25249	0.265342	0.136164	0.200747	0.0801024	0.355761	0.296114	0.115611	0.260788	0.142417	0.249017	0.194629	0.0918434	0.0609064	0.473595	0.150025	0.05185	0.0774776	0.011614	0.186502	0.0794798	0.328196
ENSG00000275291.1	0	0	0	0	0.126697	0	0	0	0	0	0	0.0915775	0	0	0	0	0.110569	0	0	0	0	0	0	0	0	0	0	0	0	0	0	0	0	0	0	0	0	0	0	0	0	0	0	0	0	0	0.809561	0	0
ENSG00000270975.1	0	0.0562651	0.0315981	0	0.0918339	0	0	0.0881431	0.102473	0	0	0	0	0	0	0	0	0	0	0.0498147	0.0530073	0	0	0.0382287	0.0369529	0	0	0.0316092	0	0.0529148	0.0512957	0	0	0.144091	0	0.226258	0	0	0.0576264	0	0.757401	0	0.124375	0.96717	0.963473	1.84142	0	0	0.0665427
ENSG00000241572.1	0	0	0	0	0	0	0	0	0	0	0	0	0	0	0	0	0	0	0	0	0	0	0	0	0	0	0	0	0	0	0	0	0	0	0	0	0	0	0	0	0	0	0	0	0	0	0	0	0
ENSG00000186474.14	0.951195	0.454955	0.0878282	0.206739	0.023205	1.61449	0.313202	0.300678	0.155361	0.22383	0.314578	0.041932	0.269475	0.353137	0.0652081	0.355968	0.101256	0.357561	0.302756	0.339861	0.0401824	0.278697	0.814057	0.270475	0.522897	0.15107	0.127911	0.191692	0.25561	0.106966	0.453658	0.41531	0.136885	0.0728192	2.27272	0.328739	0.147679	1.24632	0.946487	1.58728	1.72246	0	0.691411	0.977558	1.09555	0	0.222412	0.0468275	3.5142
ENSG00000137090.10	0.00445918	0	0	0	0	0	0	0	0	0	0	0	0	0	0.0118202	0	0	0	0	0	0	0	0.00737815	0	0	0	0.00535067	0	0	0	0.00704863	0	0	0	0	0	0	0.0131603	0	0	0.312227	0.0178515	0.0170906	0	2.79348	0	0.0115189	0	0
ENSG00000271387.1	0.121897	0.211349	0.0741826	0.0853692	0.107799	0.112905	0.179074	0.0413865	0.192461	0.0396113	0.0194849	0.0935014	0.0589102	0.054683	0.0605847	0.128617	0.0188153	0.0772578	0.117204	0.0233899	0.124445	0.0450325	0.0756338	0.107699	0.0173508	0.0802049	0.0914166	0.0593668	0.10178	0.049691	0.120426	0.140314	0	0.135312	0.0493936	0.0265592	0.174628	0.0899378	0.108231	0.134067	0.133361	0.365994	0.145997	0.605497	0.0452387	0.10172	0.492005	0.0652609	0.281199
ENSG00000266875.2	0.0490058	0	0	0	0	0	0	0	0	0	0	0.0501201	0	0.0879362	0	0	0	0	0	0	0	0	0	0	0	0	0	0	0.0545577	0	0	0	0	0	0	0	0	0	0	0	0	0	0	0	0	0.163576	0	0	0
ENSG00000196313.10	3.28601	6.04308	3.40814	2.51129	2.54523	3.41275	3.64927	4.70938	4.63093	2.91022	3.25213	2.28681	2.37531	3.26755	3.38629	3.66507	4.47713	3.89388	2.59009	4.79032	3.02269	4.55029	2.2359	3.72663	3.32814	3.98606	4.3151	3.55606	3.19627	4.03848	3.31728	3.00219	2.85162	5.17394	3.53556	1.86376	2.71298	5.09741	3.99944	5.04185	3.55466	6.40898	5.64618	2.69965	4.02522	4.47609	5.87703	4.48473	3.97018
ENSG00000248757.1	0.0671561	0.174656	0	0	0.0950225	0	0	0	0.0530157	0	0.042939	0	0.0649103	0	0.0445036	0	0	0	0.0516566	0.103089	0.219391	0.0496191	0	0	0.038236	0	0	0	0	0	0	0.0773025	0	0	0.0544244	0	0.0549756	0.0495491	0.119255	0	0	0	0.0643469	0	0	0	0.0867386	0	0
ENSG00000132530.15	0.664434	1.74514	0.506043	0.589725	0.850161	0.629058	1.66226	1.24781	1.11485	0.647027	2.43403	0.778222	0.720637	0.543011	0.77309	0.518278	0.498237	0.684905	0.900722	0.86847	0.583849	0.690212	2.44909	1.19605	0.516888	3.95627	0.44205	0.47418	0.483373	0.529196	1.24091	0.726959	0.561294	0.886044	2.80075	0.37076	0.491863	0.808965	1.0436	1.79437	1.01081	0.517943	3.15589	1.52496	0.572928	1.68349	2.4386	2.67986	0.723942
ENSG00000221492.2	0	0	0	0	0	0	0	0	0	0	0	0	0	0	0	0	0	0	0	0	0	0	0	0	0	0	0	0	0	0	0	0	0	0	0	0	0	0	0	0	0	0	0	0	0	0	0	0	0
ENSG00000141946.1	0	0	0	0	0	0	0	0	0	0	0	0	0	0	0	0.00665851	0	0	0.00849472	0.00847628	0	0	0	0	0	0	0	0	0	0	0	0	0	0	0	0	0	0	0	0	0	0	0	0	0	0	0	0.00788331	0
ENSG00000229172.1	0	0	0.00492825	0	0	0.0107153	0.0148708	0.00687369	0	0	0	0	0	0.00908204	0	0.00610324	0	0	0	0	0	0	0	0.0119248	0	0	0	0	0	0	0	0	0	0.00749112	0	0	0	0	0	0	0	0	0	0	0	0	0	0	0
ENSG00000179954.13	2.48505	4.25021	1.7052	1.40008	18.9225	2.34294	2.62803	2.65845	2.25771	2.49544	0.798897	1.5294	1.97447	7.56603	2.62334	4.58223	1.47676	2.04941	2.389	4.62149	2.44264	2.37097	3.06167	1.98592	1.11565	8.87364	3.37691	1.5242	1.91651	13.3011	1.03141	7.23232	1.14222	3.53423	17.7733	0.815847	8.62436	2.35007	3.00416	0.837615	0.850562	3.49347	2.06375	1.261	1.74883	0.628899	0.238229	4.71725	0.732024
ENSG00000206779.1	0	0	0	0	0	0.15203	0.210988	0	0	0	0	0	0	0	0	0	0	0	0	0.220467	0	0	0	0	0	0	0	0	0	0	0	0	0	0	0	0	0	0	0	0	0	0	0	0	0	0	0	0	0
ENSG00000164743.4	0.100386	0.208862	0.312789	0.140608	0.497142	0.127516	0.235956	0.136332	0.206046	0.430598	0.166882	0.19507	0.27168	0.198146	0.266097	0.193682	0.136356	0.213777	0.293424	0.431475	0.245961	0.326353	0.431854	0.189212	0.228622	0.132102	0.180682	0.166227	0.290571	0.343745	0.158679	0.716426	0.279296	0.118862	0.309146	0.979877	0.328712	0.0740665	0.14261	0	0.0585741	0.120563	0.21161	0	0.655695	0.167538	0.0129658	0.0859908	0.0617534
ENSG00000240545.3	0	0	0	0	0	0	0	0	0	0	0	0	0	0	0	0	0	0	0	0	0	0	0	0	0	0	0	0	0	0	0	0	0	0	0	0	0	0	0	0	0	0	0	0	0	0	0	0	0
ENSG00000273837.1	0.639018	0	2.86221	0.44753	0.180836	0.20293	0.469379	0.347136	0.252234	0.664493	0.776306	0.718904	0	0.917326	0.677552	0.269699	0.355087	0.324006	0.29492	0.245233	1.46132	0.613791	1.63884	0.263475	0.727663	1.38751	0.53674	0.684679	0.497989	0.312593	1.0101	1.17691	0.266685	0.0472897	1.39825	0.334154	1.72628	1.74448	0.397165	0	0.279646	0.25582	0.551059	0.952258	0.379447	0.213298	0	0.501771	0.0327583
ENSG00000276620.1	0	0	0	0	0	0	0.077773	0.0718978	0	0	0	0	0	0.189994	0	0	0	0	0	0.325068	0.172951	0	0	0	0.0602845	0	0.127049	0	0	0	0	0	0	0	0	0	0	0.0781212	0.094011	0	0	0	0	0	0	0	0.0683779	0	0.0542784
ENSG00000185483.10	0.980729	1.31464	0.557402	0.714076	4.36173	0.548803	0.545836	1.14709	0.879959	1.23266	0.549721	0.371165	0.580452	1.22878	0.738673	0.976837	0.474813	0.720708	0.97039	2.1919	0.617497	0.526709	1.89078	1.051	0.600205	1.40145	1.00831	0.643866	0.541108	2.95177	0.382438	2.45176	0.327554	0.866455	2.58747	0.594925	2.15036	1.69265	1.80677	0.114042	0.170161	0.172959	1.06803	0.98719	0.365574	0.944578	0.0362713	2.17118	0.478394
ENSG00000205495.1	0	0	0	0	0	0	0	0	0	0	0	0	0	0	0	0	0	0	0	0	0	0	0	0	0	0	0	0	0	0	0	0	0	0	0	0	0	0	0	0	0	0	0	0	0	0	0	0	0
ENSG00000122420.8	0.723132	0.506851	0.755057	0.448252	1.0319	0.309446	0.67808	1.64654	0.898816	1.04394	0.484006	0.390244	0.606747	1.17611	0.579131	0.456407	0.474973	0.499275	0.658013	1.28483	0.452372	0.859419	0.906279	0.424124	0.469538	0.696493	0.590775	0.605455	0.503588	1.08882	0.418309	1.04845	0.402384	0.405343	1.30175	0.370093	0.942119	1.10795	1.19123	0	0.484783	0.20942	0.312534	0.213992	0.301489	0.195154	0.111285	0.259198	0.104112
ENSG00000199574.1	0	0	0	0	0	0	0	0	0	0	0	0	0	0	0	0	0	0	0	0	0	0	0	0	0	0	0	0	0	0	0	0	0	0	0	0	0	0	0	0	0	0	0	0	0	0	0	0	0
ENSG00000243742.4	0.0890604	0.0965099	0.119239	0.155931	0.031504	0.0746344	0.14719	0.216705	0.433565	0.149528	0.0569444	0.24669	0.40889	0.0998815	0.0737741	0.237163	0.16038	0.210733	0.165555	0.108231	0.121229	0.202894	0.153499	0.205461	0.10564	0.0634827	0.271617	0.144582	0.107413	0.0242035	0.146644	0.111059	0.237462	0.214201	0.114279	0.0517459	0.139738	0.334029	0.533763	0.816268	1.19089	0.534806	0.732459	1.21657	0.528838	0.458299	2.01782	0.323171	0.563085
ENSG00000228780.2	0	0	0	0	0	0	0	0	0	0.0805769	0	0	0	0	0	0	0	0	0.095366	0	0	0.0916045	0	0	0.0705895	0	0	0	0	0	0	0	0	0	0	0	0	0	0	0	0	0	0	0	0	0	0	0	0
ENSG00000134504.11	0.520718	0.936779	0.68811	0.685488	1.5733	0.275603	0.589542	1.33726	1.06014	0.722647	0.433075	0.624655	1.11257	0.941404	0.978141	1.11655	0.954832	0.946912	1.13837	1.21102	0.604347	1.01826	0.971705	1.33985	0.62416	0.955726	1.06642	0.737926	0.760597	1.39811	0.693136	1.20329	0.702593	1.11549	1.05976	0.334395	1.19228	1.51656	1.14021	0.740643	0.285559	0.564253	0.528947	1.59472	0.383595	1.64663	0.247785	2.17994	0.716519
ENSG00000255360.1	0	0	0	0	0	0	0	0	0	0	0	0	0	0	0	0	0	0	0	0	0	0	0	0	0	0	0	0	0	0	0	0	0	0	0	0	0	0	0	0	0	0	0	0	0	0	0	0	0
ENSG00000268027.4	0.543964	1.01301	1.92248	0.874797	0.0855203	0.373213	1.13948	0.533541	1.87676	0.759437	0.644084	0.79329	1.42154	0.921865	0.534043	0.485886	0.957803	0.623127	1.84414	1.15975	0.542993	1.28017	0.750035	0.52214	0.906193	0.689317	0.568103	0.873269	0.549517	0.197108	2.37253	0.672532	0.476452	0.775289	0.587784	2.94984	1.36889	2.22971	0.608199	0	0.264499	0.685561	0.559818	0.300226	0.209355	0.201744	0.0520432	0.632789	0.0516399
ENSG00000254607.2	0.0298472	0.05175	0	0	0	0.0315947	0	0	0	0	0	0.0915775	0	0	0	0	0	0	0	0.0458172	0	0	0.09877	0	0.0339875	0.157109	0	0	0	0	0	0	0	0	0	0	0	0	0	0	0	0	0	0	0	0	0	0	0
ENSG00000226117.1	0.0929854	0	0.0905408	0	0.13157	0	0	0	0.146813	0.120865	0	0.0950997	0	0	0.123241	0.112128	0	0.0942942	0	0.142738	0	0.137407	0.615413	0	0.105884	0.122364	0	0	0	0	0	0	0.129353	0	0	0	0	0	0	0	0	0.744501	0	0	0	0.310376	0.1201	0	0
ENSG00000236532.4	0.00305191	0	0.0148584	0	0.0388647	0.0193836	0.00896688	0.0124342	0	0.0119009	0.00390272	0	0.0235988	0.00547636	0.0121348	0.0147207	0	0.00309487	0.0140852	0.00468487	0	0.0135296	0.0201987	0.0071905	0	0.0120485	0.0073241	0.00297271	0.00339766	0.0149292	0.0096483	0.0140521	0	0.0135511	0.0197865	0.0106393	0.0199869	0.00450351	0.0162586	0	0.0178076	0	0	0	0	0	0	0	0.00938709
ENSG00000270870.1	0	0	0	0	0	0	0	0	0	0	0	0.0307792	0	0	0	0	0	0	0	0	0	0	0	0	0	0	0	0.0293139	0	0	0	0	0	0	0	0	0	0.0444091	0	0	0	0	0.0576719	0	0	0	0.0388704	0	0
ENSG00000112763.14	8.11661	7.3054	6.68362	9.12078	8.49286	5.04401	7.76539	7.262	11.521	7.72223	8.04291	8.83003	8.50049	7.60873	6.53881	6.06466	8.53749	7.38796	8.73297	9.54308	7.52685	8.92625	9.59538	9.8369	6.47283	9.25959	8.13983	5.71589	5.85068	7.41378	9.28792	7.81297	7.18286	10.0856	9.98317	5.9088	7.63846	8.56321	8.3664	11.9981	7.86721	26.8351	6.34206	7.45847	10.1669	10.075	7.54963	7.15835	10.3835
ENSG00000118733.15	0.168257	0.145865	0.185888	0.0815797	0.521935	0.19181	0.209153	0.180169	0.0664146	0.0799118	0.0620666	0.105897	0.0750602	0.249666	0.17583	0.144368	0.0239735	0.108282	0.119468	0.144044	0.132134	0.076504	0.513965	0.133412	0.0405303	0.659995	0.159187	0.129222	0.115273	0.379882	0.0255735	0.513994	0.0135038	0.0670474	0.41432	0.152281	0.392028	0.105045	0.132156	0	0	0.0129536	0	0	0	0.0108005	0.0292547	0.00461955	0
ENSG00000263321.1	0	0.302108	0.084831	0.366088	0	0.0461112	0.0639934	0	0.412663	0.0566216	0.222818	0.0445512	0.252624	0.234497	0.0577343	0	0.0537903	0.353391	0	0.133737	0.142308	0.128742	0	0.051316	0.14881	0.229294	0.313617	0.127291	0.0484957	0.142059	0.0688564	0.100284	0.181794	0.644731	0.0706047	0	0	0.321399	0.232063	1.91639	0.381259	0.174388	0.333908	0.865516	0.258662	0.145401	0.900206	0.124381	0.133985
ENSG00000229635.1	0.056663	0.294732	0.08276	0.0793667	0.280613	0.269913	0.0832414	0.11543	0.0894641	0.0368262	0	0.115903	0.219072	0.254191	0.187749	0.204983	0.209908	0	0	0.391415	0.0925556	0.167465	0.0468772	0.166877	0.129046	0.0372827	0.101987	0.0827888	0.157706	0.138591	0.0447836	0.065224	0.0394124	0.167731	0	0	0.231928	0.125421	0.201242	0.249281	0	0.22684	0	0.281462	0	0.189135	0.0365929	0.161793	0.11619
ENSG00000280149.1	0.169516	0.3359	0.400859	0.271357	0.822365	0.435786	0.426908	0.591986	0.764701	0.220342	0.340644	0.297206	0.421321	0.695269	0.609825	0.467229	0.508359	0.564821	0.596077	0.557609	0.474676	0.536781	0.480824	0.285279	0.523941	0.669222	0.348696	0.424586	0.2696	0.750259	0.574187	0.557508	0.471633	0.573477	0.745769	0.422109	0.515431	0.250144	0.64505	0	0.282603	0.58168	0.278443	0	1.72556	0.0808324	1.09473	0.553174	1.66351
ENSG00000225378.1	0	0.0443571	0	0	0.108597	0	0	0	0	0.0332539	0	0	0	0	0	0	0	0	0	0.0392719	0	0	0.04233	0	0	0.0336663	0	0	0.0569632	0	0	0	0	0.0378651	0	0	0	0	0	0	0	0	0	0	0	0	0	0	0
ENSG00000258603.3	0.0315685	0.0273672	0.0307386	0	0.134003	0.0668337	0.023188	0.171491	0.0996858	0.0820674	0.0403692	0.0807157	0.0305128	0.198263	0.0209201	0.0380672	0.0389819	0.0320128	0.048565	0.0484596	0	0.116624	0.104466	0.0371887	0.0179738	0.0207712	0.0946992	0.0614985	0.0175724	0.102951	0.0748504	0.109014	0.0439154	0.0467237	0.0767509	0.110051	0.0258427	0.0698755	0.0840881	0	0.0460498	0.0631894	0.0604959	0	0	0	0	0.0676043	0.0323662
ENSG00000246477.3	0.0272478	0.0644224	0.00723584	0.0485741	0.0560789	0.0157326	0.0291117	0.047097	0.089953	0.0128791	0.0158381	0.012667	0.0239423	0.0266692	0.00984915	0.011948	0.0275289	0.0226074	0.00762146	0.0912589	0.0606922	0.0329438	0.0204928	0.0233446	0.0169241	0.0684536	0.0326952	0.0144767	0.00551539	0.0605863	0.0117465	0.0456212	0.00689178	0.0403287	0.0401492	0.012953	0.0121667	0.0584842	0.0219937	0.021795	0.00722674	0.0495825	0.0427221	0.0246087	0	0.0165364	0.00959813	0.0424374	0.0177777
ENSG00000100815.11	3.77048	4.02282	3.38947	4.39581	3.36804	2.41755	3.30166	5.30487	4.30808	3.58667	3.79505	3.38277	2.92795	3.66646	3.64418	2.9007	3.97031	4.18804	2.71092	4.75314	3.96579	3.90393	2.49452	4.23581	4.2967	3.45262	4.17019	3.88242	3.90025	4.16183	3.10822	3.42576	2.97668	4.02192	4.8215	2.44019	3.79872	4.58565	4.11767	0.676797	2.85614	4.00316	3.91025	4.65448	2.18409	2.35744	2.84863	3.31048	3.21908
ENSG00000119946.10	0.144763	0.34904	0.14316	0.126729	0.291246	0.165211	0.222635	0.196601	0.228564	0.188168	0.0809901	0.097161	0.0787061	0.231352	0.200859	0.139106	0.170379	0.167445	0.170508	0.267359	0.169957	0.110303	0.149703	0.106585	0.146815	0.244079	0.37455	0.169648	0.120872	0.387269	0.121564	0.286404	0.151037	0.170739	0.337291	0.0749107	0.307376	0.200267	0.204851	0	0.0329953	0.0181104	1.41742	0	0.087303	0	0.011686	0.0129172	0.0231908
ENSG00000259029.1	0	0	0	0	0	0	0	0	0	0	0	0	0	0	0	0	0	0	0	0	0	0	0	0	0	0	0	0	0	0	0	0.0263573	0	0	0	0	0	0	0	0	0	0	0	0	0	0	0	0	0
ENSG00000220505.2	0	0	0.0422885	0	0	0	0	0	0	0	0	0	0	0	0	0	0	0	0	0	0	0	0	0	0	0	0	0	0	0	0	0	0	0	0	0	0	0	0	0	0	0	0	0	0	0	0	0	0
ENSG00000264701.1	0	0	0	0	0	0	0	0	0	0	0	0	0	0	0	0	0	0	0	0	0	0	0	0	0	0.0359487	0	0	0	0	0	0	0	0.0404323	0	0	0	0	0	0	0	0	0	0	0	0	0	0	0
ENSG00000269427.1	0.979748	1.22685	1.05999	1.21983	1.50182	0.691409	1.27939	1.66323	2.49224	0.849005	0.765651	0.835022	1.10481	1.46505	0.432845	0.853263	1.0418	1.15913	1.0467	1.50397	1.68927	1.72931	0.765514	0.801512	0.898725	1.11023	1.37156	0.874797	1.03015	1.46444	1.24755	0.689196	0.946489	1.61122	1.32334	0.616691	1.24763	0.803197	1.40152	2.39459	1.50859	1.19846	1.19953	0	0.727214	1.27178	0.562418	0.660526	0.781283
ENSG00000105696.7	0.977727	0.938594	1.16717	0.758245	3.76732	1.27471	1.51749	1.35784	0.383748	1.32832	0.409702	0.898269	0.427132	1.99233	1.09818	1.27226	0.31377	0.554562	1.13023	0.814032	1.1008	0.693836	2.65054	0.82643	0.314508	3.89626	1.1268	0.532673	0.504274	2.31485	0.38419	3.39542	0.268953	0.637709	2.23832	0.664364	2.62275	0.603193	0.725882	0.63184	0.128925	0.154797	0.0952707	0	0.410008	0.0921908	0.0214039	0.0867494	0.0962791
ENSG00000203327.2	0.0316719	0.192198	0	0.0887243	0	0.0167631	0.023264	0.107533	0.200024	0.0411681	0	0.0485881	0.0612254	0.0568322	0.0419771	0.019096	0.117329	0.0321177	0.0243621	0.243091	0.155202	0.117006	0	0.0932764	0.108196	0.145875	0	0.046275	0.0881499	0	0.0250319	0.0364571	0.0881185	0.0468767	0.10267	0.027603	0.0259274	0.0467363	0.0843635	0	0.0924013	0.190189	0.030347	0	0.0470166	0.0528588	0.163629	0.0226086	0.162361
ENSG00000199963.1	0	0	0	0	0	0	0	0	0	0	0	0	0	0	0	0	0	0	0	0	0	0.198476	0	0	0	0	0	0	0	0	0	0	0	0	0	0	0	0	0	0	0	0	0	0	0	0	0	0	0
ENSG00000127362.2	0.013175	0.0228433	0.0256573	0	0.037284	0	0	0	0.0208018	0	0.016848	0.0134746	0	0	0.0349238	0	0.016269	0.0133605	0	0.040449	0.0430413	0.0194691	0.0217994	0	0	0	0.015809	0	0	0	0.0208258	0	0.036656	0.0195	0	0	0	0.0194416	0	0	0	0	0.0252478	0	0.0391165	0	0.0680674	0.0188097	0
ENSG00000229541.2	0	0	0	0	0	0	0	0	0	0	0	0	0	0	0.0189414	0	0.0176475	0	0	0	0	0	0	0	0	0	0	0	0	0	0	0	0	0	0	0	0	0	0	0.251491	0	0	0.0273871	0	0	0	0.0184587	0	0
ENSG00000161281.9	5.86862	5.80011	6.20574	5.29153	38.9891	15.0498	4.57546	5.95308	5.07686	9.74612	2.91336	5.08774	7.52598	17.439	8.12212	9.49361	3.48985	3.91874	20.0087	10.713	2.96767	5.11383	50.555	3.27836	3.23463	13.3583	6.47091	3.94665	5.5703	9.28717	2.82626	32.1333	4.35276	5.44208	19.8655	16.9651	19.925	3.68101	9.14112	4.31359	4.66948	2.88624	1.93425	2.14873	7.62024	2.88779	1.97412	4.34363	2.94193
ENSG00000235733.2	0.0194708	0	0.0189589	0	0.0275502	0.0206108	0.0572075	0.0264429	0.061484	0	0	0.039827	0	0.0349384	0.0258061	0	0.0240432	0.0394896	0	0	0	0	0.0644325	0	0.0221717	0.0256225	0.0467268	0.037931	0	0.0317489	0.0307774	0.0896502	0.0541722	0.0288182	0.126235	0.0339387	0	0.0287318	0.0345758	0	0	0	0	0	0	0	0	0.0277979	0
ENSG00000200037.1	0	0	0	0	0	0	0	0	0	0	0	0	0	0	0	0	0	0	0	0	0	0	0	0	0	0	0	0	0	0	0	0	0	0	0	0	0	0	0	0	0	0	0	0	0	0	0	0	0
ENSG00000277512.1	0	0	0	0	0	0	0	0	0	0	0	0	0	0	0	0	0	0	0	0	0	0	0	0	0	0	0	0	0	0	0	0	0	0	0	0	0	0	0	0	0	0	0	0	0	0	0	0	0
ENSG00000102316.15	28.8338	23.7903	28.0037	20.0553	79.3768	30.5273	26.0791	30.8499	32.1886	38.4539	20.1711	22.6217	36.3296	42.3018	27.9686	28.9687	27.7334	22.9654	51.1818	33.9461	16.2636	28.0921	59.0721	31.0785	25.6646	28.7435	29.1516	21.4727	22.2736	49.3412	28.0298	62.5753	20.838	30.1085	53.0445	34.194	46.8042	33.7969	57.3094	23.2255	65.0919	43.8891	26.616	38.772	102.893	11.2977	43.5888	31.9376	48.1579
ENSG00000280286.1	0.0425388	0	0	0.119166	0.0601902	0.0450294	0.0624921	0	0	0.0552932	0	0	0	0	0	0	0.0525284	0	0	0	0	0	0	0.0501121	0.0484397	0	0	0	0	0	0	0	0	0.0629605	0.0689482	0	0	0.0627719	0	0	0	0	0	0	0	0	0	0.0607315	0
ENSG00000218194.1	0	0	0	0	0	0	0	0	0	0	0	0	0	0	0	0	0	0	0	0	0	0	0	0	0	0	0	0	0	0	0	0	0	0	0	0	0	0	0	0	0	0	0	0	0	0	0	0	0
ENSG00000249274.1	0.115354	0.100002	0.0421204	0.0403934	0.16322	0.0305269	0.105914	0.0587475	0.364259	0	0.036878	0.0589883	0.055748	0.103496	0.0191109	0.0695503	0.053416	0.0731108	0.110913	0.0442687	0.0942117	0.149153	0.11929	0.13589	0.0820971	0.0569247	0.0692076	0.02809	0.128422	0.0470237	0.136755	0.0663911	0	0.085366	0.0701134	0.0502671	0.0708234	0.106388	0.179238	0.253741	0.0420674	0.0577247	0.165793	0.143249	0.0856207	0	0.093119	0.0205859	0.0443508
ENSG00000207307.1	0	0	0	0	0	0	0	0	0	0	0	0	0	0	0	0	0	0	0	0	0	0	0	0	0	0	0	0	0	0	0	0	0	0	0	0.238531	0	0	0	0	0	0	0	0	0	0	0	0	0
ENSG00000235141.1	0	0	0	0	0	0	0.115188	0	0	0	0	0	0	0	0	0	0	0	0	0	0	0	0	0	0	0	0	0	0	0	0	0	0	0	0	0	0	0	0	0	0	0	0	0	0	0	0	0.111943	0
ENSG00000159131.15	7.28935	7.2781	6.38886	6.37506	4.20772	4.18594	6.38662	7.58415	6.74585	8.85705	8.06027	4.34674	6.54814	6.6861	5.04512	4.64886	6.49146	6.7505	7.96925	8.35127	5.51164	7.32583	10.0358	7.89925	8.29626	6.44501	6.07213	6.88691	6.86507	7.03087	7.90141	6.61345	5.37607	5.98023	8.14449	10.5854	5.5827	8.48089	8.04242	5.05521	23.7069	23.0381	25.7321	15.0411	14.0242	19.5274	17.904	9.32473	11.9193
ENSG00000175471.18	0.464365	0.576283	0.611055	0.457148	0.421058	0.292138	0.59757	1.56766	0.820325	0.952965	0.428104	0.333797	0.630922	0.706225	0.399174	0.46157	0.539336	0.596232	0.513173	0.786507	0.405717	0.500025	0.875547	0.326527	0.752865	0.53213	0.668066	0.465171	0.460868	0.667188	0.4021	0.817672	0.327166	0.484836	0.951034	0.589807	0.707238	0.609098	1.01638	0.390634	0.353569	0.552417	0.549565	0.417222	0.356251	0.544704	0.130183	1.24027	0.195607
ENSG00000258608.1	0.206634	0	0.402404	0.115771	0.233902	0.0874931	0.121423	0.392877	0.1305	0.698333	0.0528479	0	0.0798896	0.0741571	0.0547736	0.199338	0.102064	0.251451	0.0635773	0	0	0.244279	0.341896	0	0.141179	0.163152	0.0495889	0.201272	0.0920175	0.0673872	0.261301	0	0.114981	0.0611668	0.133968	0.360176	0.135325	0.243934	0.0733875	0.363623	0.361708	0.165445	0.0791962	1.2317	0	0.551779	0.266888	0.0590013	0.0423712
ENSG00000132970.11	0.840219	0.974447	0.703209	0.724233	3.35984	0.806125	0.487128	1.05713	0.860741	0.942384	0.327008	0.640901	0.901752	1.86571	1.0205	0.850536	0.603781	0.638322	2.46847	1.53135	0.601307	0.772374	2.71535	0.791183	0.694381	1.38303	1.23074	0.492691	0.675745	2.6897	0.484169	2.96942	0.402645	1.35172	2.50964	0.915957	2.36942	1.10302	3.16374	0.173077	2.51689	0.539987	0.290795	0.0837515	0.417156	0.168837	0.0907378	0.296881	0.0864333
ENSG00000263857.1	0	0	0	0	0	0.426529	0	0	0	0	0	0	0	0	0	0	0	0	0	0.309266	0	0	0	0	0.229416	0	0	0	0	0	0	0	0	0	0	0	0	0	0.357764	0	0	0	0	0	0	0	0.260216	0	0
ENSG00000077458.11	1.26043	2.09379	1.47976	2.4212	0.998727	1.39014	1.66824	1.72481	2.6193	1.54472	1.28331	1.29891	2.04206	1.56812	1.38734	1.32304	1.81138	2.31531	1.78761	2.06382	2.1804	1.89449	2.16097	1.70826	1.29311	2.13572	1.69678	1.62059	1.42728	1.30361	1.75327	1.86263	1.31923	1.98279	1.64992	2.39787	1.77669	3.18492	2.53668	0.506978	2.48651	5.68985	1.7805	1.21641	1.61092	2.67657	2.57684	1.964	2.87747
ENSG00000188282.11	0.0366222	0.115449	0.05511	0.0373062	0.00471078	0.0246696	0.132055	0.049736	0.0841049	0.0346201	0.102178	0.0442649	0.0514872	0.0597409	0.0220628	0.012044	0.0411112	0.0573946	0.0256089	0.0408853	0.0217528	0.088556	0.12119	0.0902064	0.0265379	0.0920046	0.0239693	0.029186	0.048184	0.0108574	0.247343	0.00766461	0.03242	0.0394208	0.188868	0.0174095	0.0272544	0.0442155	0.0650331	0.175761	0.135983	0.0932976	0.197782	0	0.098846	0.0222257	0.0559013	0.432536	0.0546148
ENSG00000252599.1	0	0	0	0	0	0	0	0	0	0	0	0	0	0	0	0	0	0	0	0	0	0	0	0	0	0	0	0	0	0	0	0	0	0	0	0	0	0	0	0	0	0	0	0	0	0	0	0	0
ENSG00000231468.2	0	0.123488	0.0462336	0.133014	0.0671845	0.025131	0.0348769	0.0644844	0.149937	0.0617185	0.0303595	0.0242808	0	0	0.0314657	0	0.117265	0.0240751	0	0.510214	0	0.0701652	0.0785634	0.0559353	0.0270343	0.218693	0.0569745	0.0231249	0.0528611	0	0.0375273	0	0.132106	0.0351384	0.0769602	0.0413819	0.0388698	0.140132	0.126476	1.04445	0.277053	0.190085	0.363966	0.235857	0.281946	0.633959	0.122655	0.0677887	0.170386
ENSG00000248229.1	0	0	0	0	0	0.0293595	0	0	0	0	0	0	0.0536161	0	0.0735202	0	0	0.028126	0	0	0	0	0	0	0	0.0364986	0	0	0	0	0	0	0	0	0	0	0	0.0409277	0	0	0	0	0	0	0	0	0	0	0
ENSG00000238117.1	0	0	0	0	0.0806478	0	0	0	0	0	0	0	0	0	0	0	0	0	0	0	0	0	0	0	0	0	0	0	0	0	0	0	0	0	0	0	0	0	0	0	0	0	0	0	0.0846114	0	0.184043	0.0406865	0.0292186
ENSG00000228532.4	0.604405	0.0873281	0.539472	0.423289	0.285068	0.586477	0.887908	0.889236	0.556665	1.0475	0.708493	0.463611	0.389462	0	0	0.364414	0.37317	1.17475	0.309939	0.154633	0.0822717	1.19086	0.416686	0.415339	0.688248	0.132561	0.423056	0.784961	0.560731	0.164256	1.19423	0.579769	0.630598	0.074547	0.24491	0.263378	0.742171	0.297295	0.089441	0	0.293887	0.604907	0.193041	0.500376	0.149539	0.504361	0.455378	0.143816	0.309839
ENSG00000197050.9	1.10695	0.975261	1.3201	1.40402	1.53567	0.835882	1.08059	0.891225	1.39478	0.923299	0.857626	0.862918	2.2723	1.4493	1.40022	0.917422	1.24223	1.52108	2.51834	1.2343	0.718543	1.45461	2.36849	0.998194	1.63414	1.11505	1.47535	1.19061	1.3006	1.52277	1.11711	2.01713	1.6352	0.928585	1.37924	1.72207	1.53489	1.41531	2.58038	0.380706	1.45169	1.19809	0.53896	1.97016	2.95465	0.180532	0.912793	1.3899	1.71532
ENSG00000264277.1	0	0	0	0	0	0	0	0	0	0	0	0	0	0	0	0	0	0	0	0	0	0	0	0	0	0	0	0	0	0	0	0	0	0	0	0	0	0	0	0	0	0	0	0	0	0	0	0	0
ENSG00000249743.4	0	0.0336687	0	0.0271993	0.0824292	0	0.0427908	0.0131861	0	0.0378614	0	0.0496504	0.131385	0	0.0128685	0.0351243	0	0	0.134432	0.23847	0	0	0.06426	0.0686274	0.0110562	0.0638848	0	0.00945736	0.0432371	0.110824	0.0153475	0.0447051	0	0.028741	0.0472115	0.0676957	0.0317931	0.200584	0.689665	0	0.056653	0.466434	0	0	0.403575	0.0324087	0.125405	0.110894	0.925785
ENSG00000228546.2	0.0387853	0.201742	0	0	0.164638	0.0821125	0	0.0526738	0	0	0.0495979	0.0793345	0.149953	0	0.0514052	0.140309	0	0	0.0596675	0.0595379	0.190061	0.229256	0	0	0.0441656	0.255197	0.0465394	0	0.0431793	0.0632431	0.122616	0.0892906	0	0.11481	0.0628646	0	0.0635012	0.228933	0.206623	0	0	0	0	0	0.575765	0.388385	0	0.0553728	0
ENSG00000234593.1	0	0	0	0	0	0	0.0368045	0.0680483	0	0	0.0320374	0	0	0	0	0	0	0	0	0.076916	0	0	0	0	0.0285284	0.0329685	0	0	0	0	0	0	0	0.0741607	0	0.043669	0	0.0369693	0	0	0	0	0	0	0	0	0	0	0
ENSG00000166845.12	0.4714	0.66382	0.533567	0.636819	0.612834	0.108919	0.636271	1.03017	0.472262	0.60652	0.746636	0.413594	0.471826	0.669836	0.38375	0.331832	0.576191	0.553259	0.489604	0.653837	0.414317	0.576374	0.296945	0.614522	0.746604	0.919485	0.554158	0.587361	0.474189	0.440907	0.684623	0.67759	0.38614	0.286874	0.539109	0.483831	0.654266	0.522595	0.590647	0.0421088	0.670191	0.61309	0.738281	1.54521	0.902266	0.854634	0.605768	1.16153	0.785076
ENSG00000222685.1	0	0.0921263	0	0	0	0	0.0780579	0	0.0838931	0	0	0	0	0	0	0	0.131225	0	0.0817423	0.0815648	0.173584	0.0785182	0	0	0.0605053	0	0.0637572	0.0517556	0	0.0866407	0	0	0	0.157286	0	0	0	0	0	0	0	0	0	0	0.157755	0	0	0	0
ENSG00000120645.10	0.130223	0.16034	0.159878	0.148035	0.299087	0.151832	0.213486	0.243495	0.280102	0.250222	0.144806	0.206532	0.0875605	0.504598	0.160088	0.197996	0.177117	0.220093	0.24679	0.283917	0.175718	0.223112	0.293534	0.17564	0.150437	0.551354	0.169845	0.115814	0.260537	0.212341	0.164078	0.460557	0.105018	0.181566	0.731097	0.128297	0.361526	0.281281	0.44909	0.132846	0.12664	0.211552	0.122967	0.0562484	0.145687	0.075595	0.0268138	0.158972	0.0425696
ENSG00000254294.1	0	0.0332239	0	0	0	0.010142	0	0	0.0302547	0.0373613	0.0245041	0.0391957	0	0.0171923	0.050794	0.0115534	0.023662	0.0291477	0	0	0	0.0283163	0.0158528	0.0677209	0.0109101	0	0.0114965	0.0186648	0.0319995	0	0.0151448	0	0.0266567	0	0	0.0167004	0	0.0141382	0.0340277	0	0.0279523	0.0383561	0.110163	0	0	0.127922	0.0247497	0.0136786	0.0294695
ENSG00000237104.1	0	0	0	0	0	0	0	0	0	0	0	0	0	0	0	0	0	0	0	0	0	0	0	0	0	0	0	0	0	0	0	0	0	0	0	0	0	0	0	0	0	0	0	0	0	0	0	0	0
ENSG00000228082.1	0	0	0	0	0	0	0	0	0	0	0	0	0	0	0	0	0	0	0	0	0	0	0	0	0	0	0	0	0	0	0	0	0	0	0	0	0	0	0	0	0	0	0	0	0	0	0	0	0
ENSG00000267149.2	0.0114128	0.0395759	0.0333384	0.0639429	0.0161486	0	0.0335323	0.0619984	0.108117	0.0445043	0.0145945	0.0466894	0	0.0409585	0.0151263	0	0	0.023147	0	0.0875971	0.0559266	0.0337301	0.0188836	0	0.025992	0.105131	0.0410835	0.03335	0	0	0.0180403	0	0.0635063	0.118243	0.0924915	0	0.0186856	0.0336825	0.0405334	0	0.0332964	0.137068	0.131225	0	0.101654	0.114285	0.132667	0.195526	0.0234025
ENSG00000231213.5	0	0	0.00660017	0	0.18223	0.00717525	0	0	0	0	0	0.013865	0	0.0243263	0.00898389	0.0163476	0	0.00687378	0.0312836	0	0.0110721	0.0100166	0.0560774	0.00798515	0	0.02676	0.00813351	0	0.0150926	0.0221055	0	0.09363	0	0.020065	0.0549331	0.0236302	0.0554894	0	0.0120369	0	0.0197756	0	0	0	0	0	0	0	0
ENSG00000226671.1	0	0	0	0	0	0	0	0	0	0	0	0	0	0	0	0	0	0	0	0	0	0	0	0	0	0	0	0	0	0	0	0	0	0	0	0	0	0	0	0	0	0	0	0	0	0	0	0	0
ENSG00000254988.1	3.4732	2.12539	3.87923	4.65022	0.505895	0.946173	3.00138	3.19084	5.28216	1.36101	1.07771	2.19399	5.23305	3.07034	3.11399	2.0941	4.47804	4.58389	4.12525	1.72492	4.50524	3.88706	1.98601	2.07586	3.72235	2.45331	3.61598	3.08456	3.80981	0.832849	2.4221	2.23415	4.61846	2.11671	3.6426	10.8171	1.71431	3.12787	7.39211	0	0	0	0.14682	0.507424	0.985693	0	0.13194	0.109381	1.7543
ENSG00000236491.1	0	0	0	0	0.0281163	0.0210343	0	0	0	0	0	0	0	0	0	0	0.0245372	0.0201505	0	0.030503	0	0	0	0.0234085	0	0	0	0	0.022122	0	0.0314098	0	0	0	0	0	0	0	0	0	0	0	0	0	0	0	0.0513303	0	0.122238
ENSG00000254730.1	0	0	0	0	0	0	0	0	0	0	0	0	0	0	0	0	0	0	0	0	0	0	0	0	0	0	0	0	0	0	0	0	0	0	0	0	0	0	0	0	0	0.181472	0	0	0	0	0	0	0
ENSG00000072310.15	12.6361	22.316	10.668	8.34475	7.15942	21.8221	19.5291	28.3969	17.2869	16.2134	12.5135	11.3253	9.29935	11.4198	13.3813	12.301	14.9588	17.6848	7.95915	15.7174	12.1865	12.589	9.47192	21.7699	11.1265	15.7916	11.7787	16.3287	11.3506	13.04	15.7535	7.36929	8.12443	15.2319	16.1417	9.20375	10.1564	15.6447	7.40692	45.9665	8.95409	18.4265	35.9538	34.1517	6.45204	31.457	13.9058	64.0935	6.63419
ENSG00000236778.6	0.0720434	0.0662794	0.123119	0.140038	0.0936164	0.138516	0.0907168	0.167727	0.15089	0.0343999	0.0394833	0.0646593	0.0852663	0.145105	0.124715	0.0957391	0.11801	0.108841	0.0972605	0.106077	0.0984658	0.145568	0.0559523	0.0692813	0.0602722	0.139306	0.132316	0.0744702	0.0752946	0.0503457	0.141768	0.121854	0.0961301	0.0935729	0.104855	0.125576	0.139618	0.154041	0.148821	0.129365	0.0943681	0.182465	0.112702	0.0730328	0.144052	0.0294457	0.206991	0.121746	0.176369
ENSG00000228868.3	0.0183617	0	0.0268184	0	0.116914	0.0874654	0.0134872	0	0.0144954	0.0238671	0.0117403	0	0	0.0164741	0.0121681	0.0332125	0.0226736	0.00931006	0.0141238	0.183211	0.0149964	0	0.0303812	0.032446	0.0313632	0	0	0	0.0204419	0.0149702	0	0.0845435	0	0.0135883	0.0297612	0	0.0150313	0.0135476	0.0163032	0	0	0	0	0	0	0	0	0	0.0376514
ENSG00000253310.1	0.101439	0	0	0.284166	0	0	0.223529	0	0	0.0659265	0.129718	0	0	0	0.0672221	0.305802	0.18789	0.102866	0	0.0778573	0.082847	0.0749492	0.08392	0	0.173265	0.0667439	0.0608592	0.148209	0.0564653	0.0827025	0.240516	0.233529	0.282226	0	0.0822075	0.0884068	0.0830401	0.0748434	0	0	0	0	0	0	0.301169	0	0	0.0724106	0
ENSG00000254413.7	0.0779877	0.140226	0.109687	0.153739	0.020435	0.055036	0.165488	0.211828	0.332916	0.0675806	0.0960355	0.0620364	0.0725878	0.0777453	0.0689087	0.0731441	0.167637	0.155242	0.115533	0.177357	0.231186	0.157928	0.023896	0.10208	0.0690714	0.421914	0.0866474	0.0984718	0.0868229	0.0706479	0.278511	0.019949	0.200907	0.188104	0.121723	0.176215	0.0331036	0.183278	0.194911	0.203316	0.0758419	0.86725	0.0608874	0.172172	0.145787	0.154261	0.290994	0.519592	0.239876
ENSG00000184831.12	11.2527	12.1363	9.67507	10.8149	5.9103	8.53505	10.2644	9.62652	10.0125	14.0672	11.6704	8.90651	13.4578	11.2429	8.69008	9.95176	11.2068	10.7693	13.0661	11.2502	9.01456	9.371	13.4666	12.3614	12.6983	10.6604	10.2976	10.7141	10.6533	7.18256	11.4446	11.3355	12.4139	12.4958	8.53466	17.7829	10.1547	11.5618	11.3735	5.12309	14.1066	4.30719	11.3763	10.1857	22.1725	13.689	16.9699	11.4571	19.674
ENSG00000181325.7	0	0	0	0	0	0	0	0	0	0	0	0	0	0	0	0	0	0	0	0	0	0	0	0	0	0	0	0	0	0	0	0	0	0	0	0	0	0	0	0	0	0	0	0	0	0	0	0	0
ENSG00000196557.9	5.05409	3.60775	1.52331	2.77323	60.5319	6.22962	2.4138	4.90874	3.4311	6.93839	1.64638	1.94625	1.36504	13.5821	3.9362	9.04696	1.79459	1.95404	6.43376	11.6191	2.25659	2.55437	7.45438	2.84401	1.25968	10.3004	4.47042	1.73535	2.81143	26.137	0.975652	18.7481	1.23444	4.41588	22.6661	2.06828	14.089	1.6778	5.31636	3.05389	1.22211	2.69	2.26734	0.645464	1.80716	0.827522	0.65146	2.42635	1.35856
ENSG00000258074.1	0	0	0	0	0	0.0241431	0	0	0	0	0	0	0	0	0.0302288	0	0	0	0	0	0	0	0	0	0	0.0600276	0	0	0	0	0	0	0	0	0	0	0	0	0	0	0	0	0	0	0	0	0	0	0
ENSG00000236026.1	0	0	0	0	0	0	0	0	0	0	0	0	0	0	0	0	0	0	0	0	0	0	0	0	0	0	0	0	0	0	0	0	0	0	0	0	0	0	0	0	0	0	0	0	0	0	0	0	0
ENSG00000202224.1	0	0	0	0	0	0	0	0	0	0	0	0	0	0	0	0	0	0	0	0	0	0	0	0	0	0	0	0	0	0	0	0	0	0	0	0	0	0	0	0	0	0	0	0	0	0	0	0	0
ENSG00000258499.1	0	0.0181723	0.0408219	0.0587222	0.0593204	0.0443787	0.0153973	0.0142341	0.0330965	0.0408706	0	0.032158	0.081044	0.0188072	0.0277826	0.037916	0.0129423	0	0.016124	0.032178	0.0171201	0	0.0693674	0.0740819	0	0.0137925	0.0125764	0.020418	0.0233368	0.0170902	0.049702	0	0	0.0310253	0.0509639	0	0	0.108263	0.111672	0	0	0.0419589	0	0	0	0.0349846	0	0.0149635	0
ENSG00000159579.12	6.88926	6.54477	5.97444	8.28932	3.9398	7.20147	5.09903	6.73451	6.97206	6.52027	6.81846	6.72053	7.68082	5.44277	5.61802	5.10853	6.75842	6.30216	7.6986	7.01725	5.79071	7.03793	7.26683	7.05904	7.33011	5.41436	6.25446	5.78313	6.80956	4.86008	7.28637	6.0192	6.25274	6.16045	6.29657	6.81309	5.60838	6.13847	7.10242	4.02006	7.98381	7.54617	8.04048	9.76724	10.2555	5.93256	6.12057	6.66295	8.09588
ENSG00000280301.1	0	0	0	0	0	0	0	0	0	0	0	0	0	0	0	0	0	0	0	0	0	0	0	0	0	0	0	0	0	0	0	0	0	0	0	0	0	0	0	0	0	0	0	0	0	0	0	0	0
ENSG00000266559.1	0	0	0	0	0.366515	0.274197	0	1.05536	0.817957	0	0	0	0	0	0	0.312355	0.31986	0.262677	0	0	0.423111	0.382776	0	0.305147	0	0.340871	0	0	0.576752	0	0	0	0.360342	0	0.419846	0	0	0	0	0	0	0	0	0	0	0	0	0	0
ENSG00000254441.1	0	0	0	0	0	0	0	0.02153	0.0250304	0.0206065	0	0	0	0	0.0210115	0.0191168	0	0.0160764	0	0.0486714	0.0258953	0	0.0524615	0	0.0180524	0.020862	0	0	0.0352985	0	0.0501184	0	0	0	0	0	0.0259557	0.0233937	0.0281519	0	0.0462511	0	0	0	0	0	0.020476	0	0
ENSG00000271093.1	0	0.080353	0	0	0	0	0.0680824	0	0.146344	0.0602396	0	0	0	0	0	0	0.114455	0	0	0	0.0757005	0.0684839	0	0.054595	0	0	0	0	0.0515945	0	0	0	0.0644701	0	0.0751161	0	0	0	0	0	0	0	0	0	0	0	0	0	0
ENSG00000128271.18	0.0553521	0.0899731	0.158322	0.029074	0.0342652	0.0402827	0.188043	0.0751729	0.131092	0.103426	0.0707832	0.0636871	0.0869392	0.0993241	0.0687772	0.104292	0.145245	0.108754	0.0691875	0.116832	0.0734618	0.173815	0.0572409	0.0529804	0.0827276	0.0500778	0.0788716	0.107831	0.0308115	0.0225642	0.164053	0.0318576	0.0866264	0.0870456	0.0897166	0.0964821	0.0113281	0.13273	0.0307167	0.0913177	0	0.0138495	0.0729255	0.0343688	0.0410849	0.0692849	0.0134049	0.0790248	0
ENSG00000202046.1	0	0	0	0	0	0	0	0	0	0	0	0	0	0	0	0	0	0	0	0	0	0	0	0	0	0.168927	0	0	0	0	0	0	0	0	0	0	0	0	0	0	0	0	0	0	0	0	0	0	0
ENSG00000148483.8	27.6602	13.0355	23.2106	30.6181	1.57768	28.2287	24.422	19.1339	19.9687	12.7644	34.3698	26.2473	19.0397	13.3099	27.0122	22.2522	22.4558	32.8604	10.9699	14.2919	27.0333	19.0699	8.43377	17.5792	19.8493	11.7453	29.2527	27.5992	24.5605	9.25511	18.46	9.77883	24.3708	24.0864	5.15494	14.9883	17.5078	15.3488	11.3332	0.490532	0.666087	0.350722	0.223848	1.5297	2.72717	0.141782	1.76246	0.0644327	0.753957
ENSG00000236244.1	0	0	0	0	0	0	0	0	0	0	0	0	0	0	0	0	0	0	0	0	0	0	0	0	0	0	0	0	0	0	0	0	0	0	0	0	0	0	0	0	0	0	0	0	0	0	0	0	0
ENSG00000257115.1	0	0	0	0	0	0	0	0	0	0	0	0	0	0	0	0	0	0	0	0	0	0	0	0	0	0	0	0	0	0	0	0	0	0	0	0	0	0	0	0	0	0	0	0	0	0	0	0	0
ENSG00000164603.10	2.0437	1.17912	2.06507	2.24881	3.38774	1.7626	1.74578	2.19471	2.2139	2.14158	1.60931	1.50937	3.16463	2.37143	2.42526	1.96562	1.8094	2.46705	4.14171	2.07712	1.80942	2.16012	4.47193	1.80463	2.27132	2.06203	2.37236	2.16139	1.95131	3.04664	2.03913	3.31687	2.30173	1.97677	2.32386	3.82503	2.6975	2.38468	3.38017	0.431813	2.43405	1.65597	1.36369	2.40297	5.15183	1.41582	1.56205	1.93181	1.84017
ENSG00000269125.1	0.239105	0	0	0.446547	0.112774	0.253105	0.117087	0	0	0.207198	0.101921	0.081514	0	0	0	0.0961093	0.295256	0.323294	0	0.244694	0.130188	0	0.131874	0	0.181516	0.6293	0.0956358	0.155267	0.0887311	0.389883	0	0	0.221749	0.353893	0.38755	0.138925	0.130492	0.705666	0	0.701273	0.465053	0.638144	1.22188	0.791804	0.236633	0	0.720598	0.796517	0.245148
ENSG00000240095.1	0	0	0	0	0	0	0	0	0	0	0	0	0	0	0	0	0	0.0258522	0	0	0	0	0	0	0	0	0	0	0	0	0	0	0	0	0	0	0	0	0	0	0	0	0	0	0	0	0	0	0
ENSG00000232515.1	0	0	0	0	0	0	0.0595246	0	0	0	0	0	0	0	0	0	0	0	0	0	0	0.0598756	0	0.0477325	0	0	0.0486193	0	0	0	0	0	0	0.119942	0	0	0	0	0	0	0	0	0	0	0	0	0	0	0
ENSG00000176533.11	2.70332	4.13569	5.73522	2.88664	4.54508	2.06372	4.84972	3.04937	4.17784	2.45144	1.40312	1.85729	3.06788	4.65112	3.75996	3.64718	4.76375	3.85405	3.14112	3.00248	2.69099	5.73837	1.93125	2.15429	3.79902	3.21425	4.05663	3.24035	3.31408	3.69755	5.02723	3.74144	3.34475	3.82695	2.83518	3.6754	3.73347	4.91367	4.04373	0.531682	0.501045	1.36233	0.231598	0.473937	0.708187	0.127389	0.209496	0.41773	0.231513
ENSG00000255976.1	0	0	0	0	0	0	0	0	0	0	0	0	0	0	0	0	0	0	0	0	0	0	0	0	0	0	0	0	0	0	0	0	0	0	0	0	0	0	0	0	0	0	0	0	0	0	0	0	0
ENSG00000235011.2	0	0	0	0	0	0	0	0	0	0	0	0	0	0	0	0	0	0	0	0	0	0	0	0	0	0	0	0	0	0	0	0	0	0	0	0	0	0	0	0	0	0	0	0	0	0	0	0	0
ENSG00000242798.1	0.101439	0.351755	0.0740788	0.0710415	0.179413	0	0.111765	0.551049	0.280279	0.19778	0.291865	0.155618	0.294139	0.182022	0.0672221	0.0305802	0.25052	0.282883	0.11704	0.428215	0.248541	0.112424	0.2098	0.0597491	0.173265	0.367092	0.213007	0.123508	0.0564653	0	0.240516	0.0583823	0.141113	0.45041	0.287726	0.0884068	0.0830401	0.187108	0.0900664	0	0.369928	2.33503	0.291586	0.755813	0	0.253944	0.982634	0.434464	0.598012
ENSG00000273868.1	0	0	0	0	0	0	0	0	0	0	0	0	0	0	0	0	0	0	0	0	0	0	0	0	0	0	0	0	0	0	0	0	0	0	0	0	0	0	0	0	0	0	0	0	0	0	0	0	0
ENSG00000157353.15	5.65537	5.30521	6.67784	5.03214	1.62702	3.28666	5.1627	6.18268	6.48887	3.96451	4.13327	3.68034	5.02129	5.12146	5.43923	5.46607	6.30615	5.25226	4.99955	4.85638	4.67165	6.6463	2.78095	5.20608	5.55654	6.1249	5.39918	5.14226	6.24372	3.57429	5.5736	3.35525	6.50474	6.35243	3.97836	4.46957	3.09497	5.1598	5.89622	8.68688	9.57839	11.1594	6.98607	3.75596	6.34522	5.79977	9.71061	6.8323	7.09773
ENSG00000271936.1	0.484397	0.703669	0.5354	0.513448	0.0555727	0.457325	0.923168	0.924548	1.07486	0.646651	0.686403	0.562359	0.658007	0.563808	0.485844	0.505181	0.969973	0.823117	0.483371	0.663192	0.577387	0.735151	0.281602	0.771129	0.790118	0.878634	0.832584	0.663107	0.466399	0.384253	0.724297	0.241117	0.49173	0.79445	0.59415	0.730233	0.385822	0.850026	0.720694	2.99497	0.611116	1.41509	1.5053	2.21105	0.893995	2.22865	2.67168	1.2149	1.79863
ENSG00000207123.1	0	0	0	0	0	0	0	0	0	0	0	0	0	0	0	0	0	0	0	0	0	0	0	0	0	0	0	0	0	0	0	0	0	0	0	0	0	0	0	0	0	0	0	0	0	0	0	0	0
ENSG00000204556.4	0.862946	0.498735	1.04032	0.345346	0.639585	0.521984	0.905516	0.446459	0.519044	0.908031	0.788228	0.294189	0.953243	0.516158	0.217853	0.545073	0.55817	0.541724	0.758605	0.946197	0.335612	0.789408	0.951886	0.726129	0.795482	0.540758	0.542388	0.360237	0.777717	0.201016	0.844417	1.32444	0.743141	0.669022	1.26548	1.07441	0.60551	1.7585	0.583773	0.723126	0	0.493522	0.866223	0.408239	2.92808	0.41149	3.07836	1.23201	1.13754
ENSG00000158373.8	35.7563	12.0988	27.3406	26.3596	5.18424	12.7988	29.3102	28.5209	23.0869	21.2795	33.2658	48.6286	27.7515	23.9074	25.7812	27.5532	36.3796	28.8794	23.5198	10.5072	19.2057	24.3149	14.6597	28.6635	37.1322	17.0944	19.9636	34.066	29.3872	9.12443	27.9573	13.0742	53.8419	26.2269	10.9594	15.2403	23.1223	23.1992	23.0382	3.51683	8.40565	27.7354	7.46809	3.80539	7.07074	6.28164	10.5401	46.9826	4.21751
ENSG00000169435.12	8.46677	10.042	6.77041	11.4885	0.767516	5.1006	6.06969	8.9351	8.81302	5.30794	7.11834	9.2163	8.26608	5.36517	7.29654	5.40424	10.3578	9.81251	5.37365	6.61435	11.6721	6.9717	4.0605	6.37201	8.74465	5.77096	7.62944	8.52828	7.95522	4.00873	7.61655	5.34758	6.68175	7.76943	4.13717	7.31614	6.75742	8.15283	8.39731	0.635079	1.04013	2.02268	3.49569	2.15119	3.78592	0.737376	0.793831	12.8404	4.68459
ENSG00000279400.1	0	0.0224358	0	0.0181248	0.00915471	0	0	0.00878679	0.0204307	0	0	0	0.0125072	0	0.0171503	0.00780191	0	0	0	0.00993184	0.0211367	0	0	0	0.014735	0.0425708	0.0310539	0	0.00720297	0.0105499	0	0	0.018001	0.0191521	0.115355	0	0.0317789	0	0.0229786	0.0569276	0.0188759	0	0.123987	0	0.115256	0.0431923	0.00835662	0.0369482	0
ENSG00000268744.1	0.100695	0.0290981	0.0544711	0.141042	0.0474929	0.142121	0.0328728	0.0531816	0.0529953	0.0218145	0.0143075	0.102985	0.0756995	0.0501911	0.0667296	0.0539665	0.0552631	0.0794209	0.103273	0.0858742	0.0365511	0.115733	0.111073	0.0197704	0.0637021	0.0515316	0.0335629	0.0544901	0.0622795	0.0729746	0.0618991	0.0257576	0.0544751	0.0579586	0.0544034	0.087759	0.0549544	0.057785	0.119209	0	0.0652831	0.179163	0.0643221	0.222304	0.0664361	0.0560185	0.115607	0.0798667	0.177802
ENSG00000263810.1	0	0	0	0	0	0	0	0	0	0	0	0	0	0	0	0	0	0	0	0	0	0	0	0	0	0	0	0	0	0	0	0	0	0	0	0	0	0	0	0	0	0	0	0	0	0	0	0	0
ENSG00000175779.1	0.0142004	0	0.0276542	0	0	0.0300637	0.15646	0	0.0112104	0	0.0181592	0	0.027451	0	0.0376418	0.0256856	0	0.00720014	0.0546149	0	0	0.0524607	0	0.0669143	0	0.018687	0	0.00691595	0.0158092	0.0231551	0.112233	0	0.00987721	0.0105088	0.0690495	0.0371282	0.0116248	0.0104773	0.0756505	0	0.0828581	0	0.0136064	0	0.0421608	0.0236998	0	0.0304103	0
ENSG00000087095.11	4.72738	4.80664	4.45892	6.7675	2.12621	2.624	4.32641	5.64932	4.74508	3.81377	4.43227	4.76757	3.89079	4.46284	4.64829	3.79597	4.94024	5.26664	3.89785	4.31453	4.57312	4.85033	4.03799	4.629	5.45186	4.3085	4.7183	4.58334	5.07368	3.78715	4.92392	3.56673	4.36007	4.93515	4.03115	4.71273	4.11687	6.35277	4.58208	2.7746	3.99998	4.54469	3.25272	4.71281	4.52654	2.16007	5.88629	3.29629	3.08972
ENSG00000230176.2	0	0.0360839	0.0202645	0	0	0.0220302	0	0.028264	0.0328591	0	0	0	0	0	0	0	0.025699	0.0211046	0	0	0.0679892	0.0307539	0	0	0.0236986	0.0547741	0.0249723	0.0202716	0.0231694	0	0	0	0	0.0308028	0	0	0	0	0	0	0.0607171	0	0.159529	0.206755	0.123579	0.138934	0	0.178274	0.277388
ENSG00000198054.10	0	0	0	0	0.0139435	0	0	0	0	0	0	0	0	0	0.0261216	0	0	0	0	0	0	0	0	0	0	0	0	0.0095987	0	0	0	0	0	0	0	0	0	0	0	0	0.229999	0	0	0	0	0	3.62747	0	0
ENSG00000277186.1	0.0217151	0	0	0.060832	0.0307258	0.0459732	0.0319009	0.117964	0.0685713	0	0.0555378	0.0666267	0	0.0389658	0	0.0261855	0.0536292	0.0220208	0.0668133	0.0666682	0	0.064178	0.251509	0.0255812	0.0494549	0	0.0781694	0.0211516	0.0241752	0.0354085	0	0.149976	0.0906249	0	0.351966	0	0.106659	0	0.0385614	0	0.190059	0.0869327	0.0832272	0	0	0.072483	0	0	0.0222639
ENSG00000189090.7	0	0	0	0	0	0.0329507	0	0	0	0	0	0	0	0	0	0	0.0384381	0	0	0	0	0	0	0	0	0	0	0	0	0	0	0	0	0	0	0	0	0	0	0	0	0	0	0	0	0	0	0	0
ENSG00000160075.11	17.2833	21.2027	18.3403	17.0758	11.7962	19.7565	16.5616	16.4968	16.4999	18.3486	16.3772	16.9757	18.6267	16.4218	16.6714	19.0352	19.8883	17.9535	19.8376	14.9648	15.3559	16.2724	16.501	18.8871	17.608	15.486	17.3303	18.2242	21.4893	14.9705	18.1116	15.7112	21.3884	17.6438	14.4497	20.7167	17.6209	17.6373	17.6761	8.84667	16.9096	13.5765	24.707	26.6366	16.0266	20.3113	22.6829	18.646	31.8256
ENSG00000168129.8	0	0	0	0	0	0	0	0	0	0	0	0	0	0	0	0	0	0	0	0	0	0	0	0	0	0	0	0	0	0	0	0	0	0	0	0	0	0	0	0	0	0	0	0	0	0	0.0335162	0	0
ENSG00000229459.1	0	0	0	0	0	0	0	0	0	0	0	0	0	0	0	0	0	0	0.0851742	0	0	0	0	0	0	0	0	0	0	0	0	0	0	0	0	0	0	0	0	0	0	0	0	0	0	0	0	0	0
ENSG00000105135.14	21.6824	19.3276	23.2203	17.3398	11.7922	26.3921	21.2111	22.0507	21.5813	22.1794	18.5959	17.1131	25.1597	19.224	22.1017	23.1491	22.021	18.1391	23.7265	18.591	16.3813	20.462	17.6022	26.9608	22.2838	20.6696	23.8038	19.6426	22.8819	17.0394	20.4709	17.5746	27.6794	24.6393	18.047	23.6227	17.4515	17.1852	23.3047	28.1176	34.0216	18.1608	20.8818	9.72699	25.8864	20.4712	18.3752	14.3694	17.8812
ENSG00000231672.5	0.0995033	0.0269566	0.163498	0.0696862	0.53677	0.0526647	0.127904	0.160472	0.127647	0.080836	0.0397634	0.197171	0.0480879	0.16739	0.0824246	0.0824912	0.0844732	0.104057	0.176994	0.109785	0.0914247	0.114874	0.221232	0.0402938	0.0778981	0.167768	0.0708915	0.0333167	0.110776	0.299147	0.132709	0.186123	0.0346052	0.0598294	0.438475	0.13008	0.183276	0.0642386	0.0993916	0.0273594	0.0181435	0.0124482	0.0119176	0.0617828	0.036928	0.0311374	0	0.0355146	0.0159403
ENSG00000237534.1	0	0	0	0	0	0	0	0	0	0	0	0	0	0	0	0	0	0	0	0	0	0	0	0	0	0	0	0	0	0	0	0	0	0	0	0	0	0	0	0	0	0	0	0	0	0	0.0229321	0	0
ENSG00000224322.1	0.127916	0	0.0249107	0	0	0	0	0.104233	0	0.0665079	0.0327154	0	0	0	0	0	0.0315911	0	0.0393574	0.0392719	0	0.113415	0.04233	0	0	0.134665	0	0.0249194	0.0854448	0.0834318	0.0404395	0.117794	0	0	0	0	0	0.0377517	0	0	0	0	0.78442	0	0	1.02473	4.36171	0.657443	0.0786894
ENSG00000115657.11	0.30377	0.488031	0.377193	0.39816	0.445593	0.483809	0.511763	0.650989	0.418015	0.710005	0.466859	0.393335	0.28553	0.540086	0.306574	0.349502	0.406078	0.327829	0.330126	0.513364	0.710144	0.424179	0.428838	0.449777	0.320521	0.733478	0.354468	0.374609	0.344389	0.377174	0.436117	0.538935	0.457471	0.470226	0.758868	0.330324	0.424342	0.394793	0.296934	0.784671	0.325224	1.46154	0.971991	2.21492	0.405436	1.22791	3.12799	1.62731	1.01434
ENSG00000233216.1	0	0.0781071	0	0	0.0637418	0	0.0661795	0.0611801	0	0	0	0.0460731	0	0	0	0	0	0	0	0	0	0	0	0.053069	0	0	0	0	0	0.0734562	0	0	0	0	0.0730166	0	0	0	0.0799969	0	0	0	0	0	0	0	0	0	0
ENSG00000181617.5	6.50963	10.309	90.7603	15.5794	0.36263	1.11229	6.62637	0.0348056	1.61857	55.399	10.9135	39.9459	8.66999	7.54201	1.69837	1.57612	29.3684	4.78202	9.85673	33.2827	9.71213	17.0423	6.91198	0.634016	6.71224	29.2065	3.07522	13.7049	0.399447	0.208948	63.035	3.89408	5.95391	18.1315	0.540013	0.759423	15.777	139.172	3.0037	0.225498	0.747699	0.205198	0.147339	12.4758	2.13053	0	0.19861	1.53674	0
ENSG00000254209.1	0	0	0	0	0	0	0	0	0	0	0	0	0	0	0	0	0	0	0	0.0537855	0	0	0	0	0	0	0	0	0	0	0	0	0	0	0	0	0	0	0	0	0	0	0	0	0	0	0	0	0
ENSG00000253357.1	0	0.0530601	0	0	0	0.0323946	0	0.0415612	0	0	0	0.0625973	0	0.0549138	0	0	0	0	0	0	0.0499879	0	0.0506353	0.0360511	0	0.0402717	0	0.0298086	0.102209	0.0499006	0	0	0	0	0.049602	0.0533425	0	0	0	0	0.0892822	0	0	0	0	0	0	0	0
ENSG00000243976.2	0	0	0	0	0	0	0	0	0	0	0	0	0	0	0	0	0	0	0	0	0	0	0	0	0	0	0	0.0474137	0	0	0	0	0	0	0	0	0	0	0	0	0	0	0	0	0	0	0	0	0
ENSG00000131171.11	46.3818	41.6992	40.3869	54.4632	174.631	45.292	41.112	46.3514	42.575	48.545	32.7517	27.147	50.7761	76.4832	45.3018	47.4726	36.9205	38.7603	85.2624	48.3422	30.204	42.2662	120.943	36.001	48.12	49.2546	47.1178	40.0023	41.4941	83.8323	44.2362	118.142	34.9544	36.3883	97.9946	69.3454	105.594	44.8357	70.2112	3.43453	27.9009	20.5164	10.0743	8.56894	71.6105	10.8648	13.8158	39.4414	24.8582
ENSG00000211870.1	0.241762	0	0	0	0	0	0.355163	0.328333	0	0	0	0	0	0	0	0	0	0	0	0	0	0	0.400019	0	0	0.318146	0	0.470976	0	0.394215	0	0	0	0	0.391856	0	0	0	0	0	0	0	0	0	0	0	0	0	0
ENSG00000226527.1	0	0.0184794	0	0	0	0	0	0.0144746	0	0	0	0	0	0	0	0	0	0	0	0	0	0	0	0	0.0121366	0	0	0	0	0	0	0	0	0	0	0	0	0	0	0	0	0	0	0	0.0316438	0	0	0	0
ENSG00000116690.10	0.0833993	0.0698071	0.0644053	0.153069	1.66836	0.027398	0.0591469	0.160131	0.0408654	0.130834	0	0.038236	0.0778306	0.139331	0.087666	0.187265	0.113638	0.0204142	0.0530903	2.71497	0.0798577	0.0424969	0.161784	0.0169392	0.042572	0.128671	0.0552124	0.0644278	1.21022	0.464242	0.05455	0.893792	0.0240037	0.0212823	0.0792413	0.0451148	0.12242	0.097605	0.0510686	0	0.0587309	0.0690774	0.0606219	0.142851	0.196381	0.0287978	0.0668596	0.0369518	0.0589702
ENSG00000241011.1	0	0	0	0	0	0	0	0	0	0	0	0	0	0	0	0	0	0	0	0	0	0	0	0	0	0	0	0	0	0	0	0	0	0	0	0	0	0	0	0	0	0	0	0	0	0	0	0	0.0416591
ENSG00000231357.1	0	0	0	0	0	0	0.0530095	0.049005	0	0	0	0	0	0	0	0	0	0.0365918	0	0	0.117882	0	0	0	0	0	0	0	0	0	0	0	0	0	0	0	0	0	0	0	0	0	0	0	0	0.120444	0	0	0.0369957
ENSG00000251216.1	0.0145567	0	0	0.0407785	0.0411939	0	0	0	0	0.00946061	0	0	0.0140699	0.0130603	0	0.00877666	0.00898754	0	0.033591	0.0111727	0	0	0.0842989	0.00857412	0	0.0287337	0.0262003	0	0	0.05934	0	0.050268	0	0.0107725	0.0707818	0.0507463	0.0238329	0.0107402	0.0775484	0	0	0	0	0	0	0	0	0.0103911	0
ENSG00000206939.1	0	0	0	0	0	0	0	0	0	0	0	0	0	0	0	0	0	0	0	0	0	0	0	0	0	0	0	0	0	0	0	0	0	0	0	0	0	0	0	0	0	0	0	0	0	0	0	0	0
ENSG00000121716.17	0.145963	0.38834	0.55135	0.676792	0.348965	0.21578	0.273582	0.45798	0.949648	0.153745	0.186655	0.406665	0.554598	0.361265	0.643742	0.388439	0.295221	0.3139	0.178091	0.475167	0.341191	1.69952	0.141575	0.180843	0.18054	1.71216	0.347269	0.193653	0.154094	0.225696	0.31824	0.127461	0.287073	0.741228	0.338557	0.114051	0.197775	0.415923	1.13064	0.84143	0.411157	2.88139	1.19602	0.950055	2.65247	1.38603	2.14854	0.488634	1.71583
ENSG00000083844.9	1.95848	1.99687	2.1696	1.86447	1.60995	1.48502	1.68173	1.83607	1.88603	1.31497	1.41061	1.53422	2.04738	2.24317	1.72588	1.44742	2.36837	2.70793	1.45839	2.29388	1.92095	2.2236	1.13954	1.69355	2.42128	1.73645	2.41252	1.81746	1.84016	1.84588	1.73817	1.69478	1.44275	1.48875	1.90987	0.716241	2.31013	1.78149	2.36994	0.998077	0.303924	1.76549	1.11129	3.0128	1.21999	1.17067	1.18555	2.61925	1.12503
ENSG00000263640.1	0	0	0	0	0	0	0	0	0	0	0	0	0	0	0	0	0	0	0	0	0	0	0	0	0	0	0	0	0	0	0	0	0	0	0	0	0	0	0	0	0	0	0	0	0	0	0	0	0
ENSG00000258404.1	0.0958528	0.166193	0.0311109	0	0.135627	0	0.187752	0	0.201787	0.207654	0.0408582	0.0980323	0.0617648	0	0.211735	0.0770568	0.0789082	0.194404	0	0.0490466	0.15657	0.0472147	0.0528659	0.188196	0	0.252274	0.153354	0.124487	0.106712	0.312593	0.404038	0.0735566	0.17779	0.283738	0.36251	0	0.156935	0.188592	0.397165	0.281127	0.745723	4.22103	0.306144	0.634838	0.664032	0.639894	1.77451	1.91585	2.45688
ENSG00000261904.1	0	0	0	0	0	0	0.0146964	0	0	0	0	0	0	0	0	0	0	0	0	0	0	0	0	0	0	0	0	0	0	0	0	0	0	0	0	0	0	0	0	0	0	0	0	0	0	0	0	0	0
ENSG00000238150.1	0.715071	0.0885581	0.39787	0.286167	0.361353	0.270335	0.150069	0.624295	0.967724	0.597517	0.391894	0.261189	0.493684	0.0916519	0.270782	0.492729	0.063071	1.0877	0.157152	0	0.0834304	0.226431	0.253533	0.240679	0.465294	0.268856	0.735453	0.696514	0.341177	0.0832849	0.645892	0.823109	0.42632	0.151194	0.496719	0.0890293	0.250875	0.0753704	0	2.24704	0.745067	1.02238	0.587279	0.507424	0.758226	2.04586	0.0659702	0.0729206	0
ENSG00000125872.7	0	0.0186854	0.0104936	0	0.0152488	0.0342237	0.00791597	0.0219539	0.0255232	0.0280163	0	0.011022	0.0104165	0.00966907	0.0357086	0	0.0133077	0.0273215	0.0248688	0.00827161	0.0264052	0.0159253	0.0178314	0.0126956	0	0.0141818	0.0323286	0.0209945	0.0359935	0.0351455	0	0	0.0149919	0.0398766	0.00873378	0.0187848	0.0264667	0.0159028	0.0287062	0	0.0471617	0.0647152	0.247827	0.0535321	0.111988	0.0179861	0.00695971	0.0692366	0.160214
ENSG00000199562.1	0.135567	0.235051	0.132003	0.379773	0.383642	0	0.199157	0	0.214045	0	0.520083	0.2773	0	0.243263	0.179678	0.326951	0.669614	0	0	0.624313	0.442883	0	0	0.159703	0	0.1784	0.16267	0.132049	0.452778	0.663166	0	0	0.56577	0.802599	0	0.236302	0.221958	0	0	0	0	0.54272	0.259793	0	0	0	0.350197	0.580639	0.972953
ENSG00000201469.1	0	0.222571	0	0.359608	0	0.271771	0	0	0	0	0.164156	0.131288	0	0.230346	0	0	0.158515	0	0	0.197055	0.209684	0	0	0	0	0	0.154033	0.250076	0	0.418635	0.202913	0	0	0.189996	0	0.223755	0	0.189427	0	0	0	0	0.491998	0	0.381126	0	0.331603	0.183269	0.131613
ENSG00000249825.4	0.0897353	0.132248	0.091745	0.163398	0.755478	0.0712421	0.0988701	0.237643	0.219606	0.0758165	0.0688511	0.064243	0.0607141	0.289839	0.0951465	0.119029	0.171753	0.0636989	0.283001	0.392586	0.0732887	0.125974	0.200442	0.0739979	0.117511	0.206652	0.183048	0.078666	0.0949063	0.387753	0.0992912	0.330538	0.131074	0.172659	0.269075	0.117311	0.367298	0.086071	0.0637402	0	0.0261799	0.413125	0.214954	0.0445742	0.359671	0.0149764	0.846084	0.0256226	0.174806
ENSG00000105176.16	9.78709	12.0196	10.8767	12.1563	8.22959	8.06196	9.70553	10.9815	10.4437	10.3057	8.124	8.09237	11.5221	11.3662	10.0339	9.4898	10.6114	11.4576	11.9671	10.5597	8.10455	10.9427	11.0197	9.74268	11.3454	9.4249	10.9427	11.692	10.9167	10.9774	9.98297	10.9492	9.11627	9.73481	10.0936	11.1201	12.1764	12.3419	14.1931	7.96523	16.3062	24.2782	16.2427	10.3996	19.163	11.5164	17.5422	10.2098	21.9306
ENSG00000200575.1	0	0	0	0	0	0.147645	0	0.189423	0	0	0	0	0	0	0	0	0	0	0	0.214107	0.227829	0	0	0	0	0.183546	0	0	0	0	0	0	0	0	0	0	0	0	0	0	0	0	0	0	0	0	0	0	0
ENSG00000106541.10	172.381	198.145	162.631	201.708	39.8161	170.33	175.122	316.668	348.767	1022.4	297.218	308.001	500.396	172.158	161.305	194.421	289.126	214.309	437.818	356.697	141.932	225.257	752.555	479.804	280.05	165.297	144.832	216.255	175.403	217.831	331.075	297.899	185.201	270.524	542.257	319.489	258.239	436.854	535.498	119.108	120.37	74.6861	637.925	1592.38	186.68	787.905	96.8848	652.919	312.151
ENSG00000267019.1	0	0	0	0	0	0	0	0	0	0	0.0331243	0	0	0	0	0	0	0	0	0	0	0	0	0	0	0	0	0	0	0	0	0	0	0	0	0	0	0	0	0	0	0	0	0	0	0	0	0	0
ENSG00000277913.1	0	0	0	0	0	0	0	0	0	0	0	0	0	0	0	0	0	0	0	0	0	0	0	0	0	0	0	0	0	0	0	0	0	0	0	0	0	0	0	0	0	0	0	0	0	0	0	0	0
ENSG00000279088.1	1.77214	2.05518	1.63413	1.77535	2.24179	1.86348	1.82754	2.31108	3.85419	2.50179	1.18562	1.21229	2.35946	2.75875	1.52435	1.96713	2.04338	2.23743	2.6721	2.26996	1.82116	2.51468	2.77683	1.83878	1.91106	2.90347	2.7883	1.16601	1.6724	1.7223	3.20934	2.51271	2.0571	2.34497	3.40496	2.33205	2.26734	3.03067	2.93853	2.58155	3.35545	5.12115	2.7438	1.6323	3.4844	4.77918	3.5925	2.396	2.83969
ENSG00000188314.3	0	0	0	0	0	0	0	0	0	0	0	0	0	0	0	0	0	0	0	0	0	0	0	0	0	0.0204596	0	0	0	0	0	0	0	0	0	0	0	0	0	0	0	0	0	0	0	0	0	0	0
ENSG00000275818.1	0	0	0	0	0	0	0	0	0	0	0	0	0	0	0	0	0	0	0	0	0	0	0	0	0	0	0	0	0	0	0	0	0	0	0	0	0	0	0	0	0	0	0	0	0	0	0	0	0
ENSG00000163092.18	0	0	0	0.00311839	0.00630032	0.00235669	0	0	0	0	0	0	0	0.00399496	0	0	0.00137458	0	0	0.00170879	0	0	0.00552554	0	0	0	0	0	0.00371784	0	0	0	0	0	0.00180426	0.00582096	0.00182254	0	0	0	0	0.00445638	0.00213321	0	0	0	0	0.00158924	0
ENSG00000198049.6	0.0574358	0.0331947	0.118066	0.0715103	0.117388	0.101331	0.0562511	0.11267	0.130988	0.0912472	0.0489651	0.091376	0.03701	0.103063	0.0676658	0.0461731	0.149728	0.0582442	0.166901	0.166539	0.0938179	0.0377219	0.211184	0.105251	0.116272	0.117573	0.168467	0.0559453	0.0355237	0.0520301	0.0907887	0.0881514	0.0976553	0.160573	0.113781	0.0222475	0.0522425	0.386104	0.849945	0	0.0372369	0	0	0	0	0	0	0	0.00654302
ENSG00000253821.1	0.02242	0	0	0	0	0	0	0	0.0353985	0	0	0	0	0	0	0	0	0	0	0	0	0	0.037096	0	0	0	0	0	0	0	0	0	0	0	0	0	0	0	0.039813	0.394534	0	0.0897544	0	0	0	0	0	0.0320084	0
ENSG00000256098.1	0	0	0	0	0	0	0	0	0	0	0	0	0	0	0	0	0	0	0	0	0	0	0	0	0.0794132	0	0	0	0	0	0	0	0	0	0	0	0	0	0	0	0	0	0	0	0	0	0	0	0
ENSG00000234043.3	0.0778831	0.0675181	0.0189589	0.0545446	0.137751	0.103054	0.257434	0.0793288	0.215194	0.101235	0.0995953	0.039827	0.0376392	0.244569	0.12903	0.0234791	0.0480864	0.0987241	0.0898616	0.0896665	0.159022	0.201407	0.322163	0.0917489	0.110859	0.10249	0.0700901	0.0948275	0.108383	0.190493	0.153887	0.493076	0	0.115273	0.0631177	0.135755	0.127514	0.172391	0.242031	0	0.11361	0.0779477	0	0	0.0578084	0.0649914	0	0.222383	0.0598884
ENSG00000142224.14	0.00560716	0.00972187	0.0163792	0	0.00793385	0	0	0	0	0.196786	0.00717032	0.0114693	0	0.0100615	0.0148632	0	0.0346196	0.0113722	0.0776346	0.0860734	0	0	0.417491	0.0264217	0.00638498	0.00737873	0.00672815	0	0	0.00914299	0.00886323	0.0129087	0	0.016598	0.0272648	0	0.0183606	0.107564	0.179228	0.0493358	0.0327173	0.0224473	0.0537261	0	0.0665902	0	0	0.0160104	0.00574885
ENSG00000260329.1	0.21724	0.0856041	0.163454	0.359608	1.90019	0.376298	0.217595	0.402314	0.358587	0.474904	0.0631369	0.232279	0.209975	0.797352	0.26175	0.464387	0.158515	0.160217	0.987418	0.272845	0.161295	0.262654	1.32341	0.151223	0.213643	0.480793	0.438401	0.144275	0.0879459	1.2237	0.343391	1.65951	0.16484	0.219226	1.13636	0.378663	1.1802	0.422567	0.683867	0	0.172851	0.079062	0.227076	0.0980996	0.498395	0	0.267833	0.126879	0.151861
ENSG00000204054.10	1.62172	1.88158	1.19376	1.16448	3.24358	2.2623	1.7522	1.97813	1.38439	2.08059	1.26868	0.92623	1.74642	1.79614	1.11951	1.98231	1.16348	1.21739	1.80251	2.35842	0.892653	1.3907	2.67229	1.43251	0.677834	1.45726	1.46045	1.06353	1.03909	3.00767	1.29837	1.89099	0.812655	1.7719	3.18372	2.08481	2.0127	1.76332	1.95663	1.6288	2.17323	3.13298	2.11575	2.31261	2.94224	2.17192	2.77325	3.59717	4.85969
ENSG00000251061.2	0.304316	0.644884	0.0329239	0.094722	0.0478435	0	0.0496732	0.505128	0.0533865	0.087902	0.216196	0	0.326821	0.30337	0	0.122321	0.584546	0.171444	0	0	0.441851	0.849424	0	0.0796654	0.34653	0.578447	0.121718	0.131742	0.0376435	0.055135	0.160344	0.544902	0.0940752	0	0.164415	0.235751	0.33216	0.648643	0	0	0	0	0	0	0.10039	0	0	0	0.797349
ENSG00000243844.1	0.0261836	0	0.0509905	0	0.111145	0	0	0.0711191	0.0826816	0.23824	0.0334831	0	0	0	0.0694063	0.0315738	0	0.0531043	0.0402809	0	0	0.0773843	0.0433233	0.0308452	0	0.0344563	0.0628365	0.102017	0	0	0.0413884	0	0	0.0387537	0.0424393	0	0.128607	0	0	0	0	0	0.0501767	0	0	0.349593	0.0338187	0	0
ENSG00000248710.1	0	0	0.00420368	0	0	0.00456995	0	0	0	0	0	0	0	0	0	0	0	0	0	0	0.00705186	0	0	0	0	0.00568118	0	0	0	0	0.00682416	0	0	0	0	0	0	0	0	0	0	0	0.0165464	0	0	0	0	0	0.00442628
ENSG00000231821.1	0	0	0.0165585	0	0	0	0.0499644	0.0230949	0	0.0221043	0	0	0	0	0.0225387	0	0.020999	0	0	0	0	0.0251295	0	0	0.0193645	0.0223784	0	0.0165642	0	0	0.0268806	0	0	0	0.0826894	0	0.0278423	0	0	0	0	0	0.0651767	0	0.0504891	0	0	0	0
ENSG00000164251.4	73.9801	107.412	76.1322	80.0351	7.09836	43.942	90.491	53.8586	83.3111	60.1154	105.014	98.011	85.5931	51.0727	68.6283	82.504	87.1629	82.3068	58.8596	49.8716	108.779	58.1613	54.6232	63.2692	71.9686	50.4387	69.1816	83.3189	74.86	70.0232	70.1441	50.0469	74.3858	77.1103	24.9182	112.078	54.7249	68.3114	64.6239	16.3962	22.6049	20.9472	31.228	31.9104	29.0609	33.4576	29.4398	46.4947	45.3509
ENSG00000234048.1	0	0	0	0	0	0	0	0	0	0	0	0	0	0	0	0	0	0	0	0	0	0	0	0	0	0	0	0	0	0	0	0	0	0	0	0	0	0	0	0	0	0	0	0	0	0	0	0	0
ENSG00000167157.10	0.442585	2.83926	1.18511	0.340956	0.79845	0.527061	0.731458	2.9302	0.733728	1.88406	0.268835	0.74687	1.56141	0.754468	0.689245	1.00068	0.64216	0.504916	0.902158	1.35879	0.632569	0.539565	1.15337	0.443173	0.529179	1.96566	0.59745	0.56043	0.739088	2.02069	0.699594	1.01891	0.646471	0.491294	1.54232	1.13789	0.742737	0.783715	1.08066	4.57566	3.19577	1.41745	2.16276	0.769457	2.03674	2.58528	0.743134	8.73556	0.136131
ENSG00000157107.12	8.61062	8.58327	7.69728	11.8386	5.90253	8.92432	6.96299	9.71335	8.95628	7.33643	7.12679	7.90568	10.151	7.34525	10.2294	7.92517	8.13897	9.62253	8.96705	7.67558	8.79398	8.70083	7.6896	9.03637	8.65932	6.90087	9.37187	8.92218	8.55819	6.93721	8.03476	9.29296	7.53218	7.71249	6.66929	11.3154	8.51213	8.76192	12.1164	1.31235	3.66076	5.74361	5.66211	4.11604	7.29619	5.3658	6.28392	7.44959	7.02228
ENSG00000225924.1	0	0	0	0	0	0	0	0	0	0	0	0.0263978	0	0	0	0	0	0	0	0	0	0	0	0	0	0	0	0	0	0	0.0407993	0	0	0	0	0	0	0	0	0	0	0	0.0494624	0	0	0	0	0	0
ENSG00000250173.1	0	0	0	0	0	0	0	0	0	0	0	0	0	0	0.0457751	0	0	0	0	0	0	0	0	0	0	0	0	0	0	0	0	0	0	0	0	0	0	0	0	0	0	0	0	0	0	0	0	0	0
ENSG00000252556.1	0	0	0	0	0	0	0	0	0	0	0	0	0	0	0	0	0	0	0	0	0	0	0	0	0	0	0	0	0	0	0	0	0	0	0	0	0	0	0	0	0	0	0	0	0	0	0	0	0
ENSG00000249990.1	0	0	0	0	0	0	0	0	0	0	0	0	0	0	0	0	0	0	0	0	0	0	0	0	0	0	0	0	0	0	0	0	0	0	0	0	0	0	0	0	0	0	0	0	0	0	0	0	0
ENSG00000166090.8	0.0106114	0	0.0103324	0	0	0.0112327	0.0311775	0	0	0	0.0271392	0	0	0	0.0281281	0	0	0.0215214	0.0326491	0.0162891	0	0.0156807	0	0	0.0725001	0.013964	0.0127328	0.010336	0	0.0173028	0	0	0	0.0157056	0	0.0184962	0	0.0313171	0.0188435	0	0	0	0	0	0	0	0	0	0
ENSG00000277122.1	0	0	0	0	0	0	0	0	0	0	0	0	0	0	0	0	0	0	0	0	0	0	0	0	0	0	0	0	0	0	0	0	0	0	0	0	0	0	0	0	0	0	0	0	0	0	0	0	0
ENSG00000223702.1	0.0338129	0	0	0	0	0.0715853	0	0	0	0	0	0	0	0	0.0448148	0	0	0	0.0520178	0	0.0552313	0	0	0	0	0	0	0	0	0	0	0	0	0	0	0	0.05536	0	0	0	0	0	0	0	0	0	0	0	0
ENSG00000235266.1	0	0	0	0.129002	0	0	0	0.0625397	0	0	0	0	0	0	0	0	0	0	0	0.0706895	0	0	0	0	0	0	0.0552563	0	0	0	0	0	0.0640607	0	0	0	0	0	0	0	0	0	0	0	0	0	0	0	0
ENSG00000260755.1	0	0	0	0	0	0	0	0	0	0	0	0	0	0	0	0	0	0	0	0	0	0	0	0	0	0	0	0	0	0	0	0	0	0	0	0	0	0	0	0	0	0	0	0	0	0	0	0	0
ENSG00000277249.1	0.216503	1.50152	0.843246	0	0	0	0.95417	0.882089	2.73466	0.844253	0	0.221426	1.25558	0.388494	0.573897	1.04429	0.534692	0.658652	0.666138	2.65877	1.06094	2.23953	0	1.27524	0.493073	0.854721	2.59787	0.632655	1.44618	0.353028	0.684453	0	1.80709	1.6022	0	0.377378	0.35447	0.958442	0	0	1.26328	0	1.65957	6.45261	1.28559	0	1.39818	0	0.665923
ENSG00000163534.13	0.0958446	0.364315	1.76241	0.598951	0.0365118	0.0858478	0.254526	0.0550699	0.343397	0.541452	0.131992	0.870905	0.327801	0.284435	0.166116	0.0444521	0.673698	0.366346	0.476369	1.12609	0.698483	1.67235	0.195181	0.0825099	0.172106	1.01871	0.358288	0.423699	0.0656633	0.0480872	1.77723	0.169732	0.1641	0.583797	0.0776741	0.147786	0.712182	3.39981	0.458229	0.0973049	0.075283	0	0.0423856	0.3296	0.0218893	0.110741	0.00476126	0.0315773	0.00755898
ENSG00000258883.1	0	0	0	0	0	0	0	0	0	0	0	0	0	0	0	0	0	0	0	0	0	0	0	0	0	0	0	0	0	0	0	0	0	0	0	0	0	0	0	0	0	0	0	0	0	0	0	0	0
ENSG00000173641.16	4.64851	2.10981	0.7008	2.65016	69.5431	10.7603	1.44427	4.33803	0.902054	4.59078	1.52287	2.19308	1.07575	18.8595	3.9582	8.93384	0.595545	0.805094	13.4693	22.5804	1.99371	0.789439	12.7863	2.3906	0.616782	11.5265	3.59243	0.979294	1.82555	27.4579	0.310805	28.8595	0.639952	2.76194	17.3118	25.252	12.6765	0.837595	4.65111	0.783417	0.77929	1.27727	1.25837	0.110569	1.76234	1.0402	0.129376	1.44066	0.23963
ENSG00000146576.11	7.86967	13.3681	9.32477	7.00103	7.56892	8.02087	9.96749	10.4855	10.7042	9.4897	6.90851	7.16762	8.91193	9.43651	8.97849	9.75263	12.3376	9.63584	10.1435	10.048	6.46207	9.74339	8.12061	8.73203	7.84723	10.587	9.44299	8.32323	8.29356	9.19064	9.72473	7.5897	9.81588	10.9787	9.37696	11.2797	7.783	10.5457	9.0081	12.2579	15.1718	21.2445	11.5349	10.5123	16.7185	10.3653	15.8991	10.0662	11.7648
ENSG00000223488.2	0	0	0	0	0	0	0	0.0095631	0	0	0.00900467	0	0	0.0126355	0	0	0	0	0	0	0	0	0	0	0	0	0	0	0.00783935	0	0	0	0	0	0	0	0	0	0	0	0	0	0	0	0	0.0470084	0	0	0
ENSG00000224968.1	3.54519	1.17813	5.43687	6.70366	0.125407	1.21965	3.16826	0.962932	0.97955	0.614419	1.77563	2.20569	1.54198	3.28677	4.38546	0.855001	3.28329	5.03312	0.818089	0.362805	5.59783	2.44478	0.244411	0.696058	3.70056	1.08857	3.11956	3.94239	7.40028	0.192692	1.30757	1.70034	7.39765	1.53042	0.143654	6.48844	1.40272	0.566737	0.68201	0	0	0	0.0566148	0	0.0877133	0	0.19079	0.0843562	0.0908694
ENSG00000174442.10	2.30644	3.21059	2.11181	2.37161	1.02011	1.26349	2.62802	3.58736	2.59304	4.26949	4.25008	1.56647	3.18637	2.15254	1.90313	1.76398	2.47497	3.20044	3.03279	2.64965	1.91548	2.63467	3.77167	3.18576	3.0045	3.0509	2.34039	2.49718	2.61769	1.82921	2.61967	2.4242	1.95591	2.24923	3.1662	3.80125	2.25299	3.93319	2.46487	2.84269	6.08309	7.02985	9.42456	9.4507	3.85465	10.7442	3.15286	5.7614	3.6805
ENSG00000265965.1	0	0	0	0	0	0	0	0	0	0	0	0	0	0	0	0	0	0	0	0	0	0	0	0	0	0	0	0	0	0	0	0	0	0	0	0	0	0	0	0	0	0	0	0	0	0	0	0	0
ENSG00000213671.3	0	0	0.0223487	0	0	0.024296	0	0.0311709	0.0543579	0.0149169	0	0	0	0.0411853	0	0.0138385	0.014171	0.0116376	0.0353096	0	0	0.0169584	0	0	0	0.0302037	0	0.0223565	0	0	0	0	0.031929	0.0169854	0	0.0600103	0	0.0169345	0	0	0	0	0.021992	0	0.0340722	0	0	0	0.0235321
ENSG00000184144.8	0.316782	0.237175	0.286021	0.165383	1.37525	0.210343	0.35749	0.531904	0.113673	0.273261	0.156514	0.231207	0.0640211	0.571018	0.211836	0.201415	0.090681	0.191284	0.190505	0.316082	0.206978	0.131924	0.648035	0.18659	0.100019	1.06491	0.262624	0.20898	0.209999	0.662112	0.091043	0.895034	0.0420649	0.225905	0.968554	0.0727859	0.785048	0.284723	0.0920512	0.0126694	0.00840178	0.0230578	0.0220749	0	0.00427509	0.0048063	0.00743917	0.00205573	0.0014763
ENSG00000264023.1	0	0	0	0	0	0	0	0	0	0	0	0	0	0	0	0	0	0	0	0	0	0	0	0	0	0	0	0	0	0	0	0	0	0	0	0	0	0	0	0	0	0	0	0	0	0	0	0	0
ENSG00000274929.1	0.197693	0.171383	0.0962478	0.0692261	0.24476	0.130793	0.181514	0.167802	0.273117	0.0963628	0.126403	0.151641	0.334393	0.221713	0.163761	0.148994	0.152574	0.100238	0.494213	0.227603	0	0.182585	0.204439	0.203778	0.253256	0.227634	0.29652	0.0240703	0.0825336	0.0805891	0.312493	0.398233	0.20626	0.36575	0.0801068	0.301517	0.364131	0.255258	0.131647	0	0.216285	0.395714	0.0473558	0.736499	0.513578	0	0.319175	0.176401	0.380041
ENSG00000141570.9	1.05553	0.585878	1.30593	0.878294	0.754156	1.16158	1.38176	1.06921	1.39155	1.47616	0.84195	0.694749	1.56234	1.13143	1.26508	1.16781	1.40665	1.55436	1.50057	1.39571	0.790946	1.2921	1.14703	1.37067	1.15832	1.17815	1.51318	1.19101	0.988956	0.636197	1.33258	0.994463	1.5556	1.48492	1.45676	1.25693	0.958191	1.68096	1.27434	5.0881	5.52881	6.90326	4.94006	5.29505	4.63355	3.24419	4.09446	2.53646	3.06446
ENSG00000231255.1	0	0	0.105014	0	0.0763006	0	0	0.0732342	0	0	0	0.0551508	0.104243	0	0	0	0	0	0	0	0	0	0	0	0	0.070962	0	0.0525252	0.0600337	0.087929	0.0852386	0	0	0	0	0	0.088288	0.159147	0	0	0	0	0	0	0	0	0	0	0.0552873
ENSG00000276109.1	0	0	0	0	0	0	0	0	0	0	0	0	0	0	0.0343313	0	0	0	0	0	0	0	0	0	0	0	0	0	0	0	0	0	0	0	0.0419846	0	0	0.0382236	0	0	0	0	0	0	0	0	0	0	0
ENSG00000163513.16	27.2876	40.1959	35.1188	28.6454	56.4085	31.5555	33.1652	54.6315	33.0981	42.4638	20.1428	18.863	24.548	46.713	37.0288	28.7255	27.6184	29.9545	28.5397	42.764	25.0593	35.1288	38.6702	22.0105	36.8107	37.5688	40.2174	35.4404	28.0961	49.5233	23.6798	64.5957	16.9489	26.3896	63.1518	25.5047	51.3309	32.9132	45.0618	18.2874	41.8969	47.0716	16.765	12.7443	23.3372	15.5117	30.7918	39.3717	27.6484
ENSG00000136834.3	0	0	0	0	0	0	0	0	0	0.0389164	0	0	0	0	0	0	0	0	0	0.0229795	0	0	0	0	0.0170464	0.0196994	0	0	0	0.0244096	0	0	0	0	0	0	0	0	0.0265831	0	0	0	0	0	0	0	0.0193349	0	0.0306962
ENSG00000226415.1	2.39828	1.10662	2.33523	2.0047	1.34096	2.90722	1.87526	5.4372	3.72552	5.70678	2.27542	1.66158	1.12165	1.11058	1.69185	2.26228	2.05393	3.76573	1.60673	1.03913	0.94777	3.34393	2.1121	2.14172	2.15834	1.24713	2.01906	2.16649	2.17474	0.630744	3.24066	0.845999	2.69055	0.916034	1.34798	1.55077	1.13997	1.48409	0.961669	7.6579	4.23198	2.78741	3.33575	5.57219	2.58403	16.9788	2.24827	1.02167	1.30876
ENSG00000266032.1	1.59563	5.0301	1.83617	0.812715	1.23149	0.307101	1.27859	1.379	0.687084	2.6397	1.11298	1.3352	5.04742	3.38379	1.7303	1.39935	1.43297	2.20648	2.45472	2.22672	1.6586	2.3579	2.88013	1.19618	2.14733	2.09976	2.26274	1.69551	1.61491	2.36529	1.83433	0.333947	3.22866	2.79104	3.5267	3.79265	3.08743	3.21078	2.06072	0	2.53919	1.16142	3.05777	1.44108	3.01471	2.90512	0.936777	1.24257	1.9334
ENSG00000185761.9	0.45618	0.999081	0.49484	0.493234	1.51176	4.46037	0.911178	0.853213	1.35837	0.582554	0.260974	0.376516	0.881849	1.06271	0.599306	0.675549	0.662133	0.458543	0.646384	1.06268	0.666707	0.804199	0.456849	0.579821	0.628821	0.974185	0.749046	0.627535	0.650418	0.802568	0.385843	0.626438	0.411933	1.37997	0.72642	0.474299	0.687915	0.631823	1.35013	2.88712	3.61907	6.58406	3.1287	2.38524	2.09099	3.87349	3.96935	2.14236	1.30056
ENSG00000176225.11	0.620849	0.759354	0.688879	0.705575	0.615156	0.689466	0.7848	0.995675	1.10436	0.900836	0.777517	0.484018	0.663661	0.829063	0.642127	0.541664	0.837961	1.12252	0.654019	0.778194	0.61843	0.960115	0.804284	1.04321	0.632073	0.928894	0.800794	0.832881	0.600098	0.850165	0.798794	0.886389	0.555696	0.888034	0.936086	0.710265	0.717054	1.19076	0.897377	1.07277	0.772259	1.16887	1.62016	1.0997	1.0431	1.57433	0.839183	1.55974	0.809242
ENSG00000230081.2	0	0	0	0.192586	0.0972742	0.0727727	0	0	0	0	0	0	0	0	0	0	0	0	0	0	0	0	0	0	0	0	0	0	0	0	0	0	0	0	0	0	0.112557	0	0	0	0	0	0	0	0	0	0	0	0
ENSG00000197665.7	0	0	0	0	0	0	0	0	0	0	0	0	0	0	0	0	0	0	0	0	0	0	0	0	0	0	0	0	0	0	0	0	0	0	0	0	0	0	0	0	0	0	0	0	0	0	0	0	0
ENSG00000129990.13	0.151921	0.188147	0.192833	0.113996	0.614172	0.614546	0.282962	0.202637	0.102799	0.215103	0.0936675	0.169248	0.22026	0.282343	0.136632	0.134125	0.0904486	0.159561	0.125205	0.120768	0.194978	0.104231	0.359097	0.226906	0.061784	0.753269	0.169272	0.137408	0.0755053	0.305227	0.0900529	0.474658	0.0717044	0.144549	0.611198	0.0945739	0.368656	0.252203	0.298683	0.0477395	0.0474881	0.0325815	0.0311927	0	0.0483268	0.0181106	0.0350394	0.0503502	0.0139071
ENSG00000153989.7	7.3118	8.44983	6.44296	7.97768	4.04264	5.03735	6.32094	6.94302	6.39672	10.0807	7.47777	4.91134	7.47207	6.29575	6.20842	5.67102	6.45083	6.29795	8.01282	7.00016	5.61446	6.02815	10.974	6.44646	6.70114	5.7601	6.55506	6.59327	6.06453	6.72256	5.8745	7.43453	5.74389	5.78061	6.97899	10.5982	6.94809	7.00384	7.50845	3.11164	10.2903	6.7435	10.9206	9.83117	9.00764	12.2496	6.37874	8.58317	7.78919
ENSG00000181171.5	0.00626597	0.0434566	0	0	0	0.00663285	0.0092051	0	0	0	0.0080128	0.0128169	0	0	0.00830477	0	0.0154749	0	0	0.00961865	0.0204702	0	0	0.014763	0	0.00824569	0.0150373	0.00610337	0	0.0102172	0	0	0	0.0092741	0	0	0	0	0	0	0	0	0	0.0622498	0	0	0	0	0.00642431
ENSG00000256981.1	0.0318807	0.0829137	0	0	0.0225548	0.0168737	0	0	0.0251679	0.0207198	0	0.0163028	0.0308145	0	0	0.0192219	0.0393674	0.0323294	0	0.0978777	0.130188	0.0235555	0	0	0	0.0209767	0.0191272	0.0155267	0.0177462	0.0519844	0.0251969	0	0	0	0	0	0.0260983	0	0	0	0.0465053	0	0	0	0	0.0532073	0.0617655	0.0455153	0.0163432
ENSG00000233264.2	0.0296237	0.154087	0.0769196	0.193635	0.013972	0.0313582	0.15957	0.348672	0.389769	0.0256705	0.0757643	0.0201982	0.0190887	0.0708758	0.0130875	0.0595367	0.0243869	0.0400542	0.0303821	0.136422	0.112907	0.0583675	0.0326768	0.0814279	0.0562217	0.103955	0.0947895	0.0192366	0.0549662	0.0161014	0.187304	0.0681988	0.0274733	0.0876904	0.112035	0.0688477	0.0485013	0.174855	0	0	0	0.118593	0.113538	0	0.0293174	0.0659205	0.0510158	0.0704882	0.151861
ENSG00000279991.1	0	0.013988	0	0	0	0	0	0	0.0127379	0	0	0	0	0	0	0	0	0	0	0	0	0	0	0	0	0	0	0	0	0	0	0	0	0	0	0	0	0	0	0	0	0	0	0	0	0	0	0	0
ENSG00000105472.11	4.20656	5.99229	4.4998	2.2683	5.50497	2.8954	6.36828	6.83934	4.94227	3.99176	1.36376	2.59546	4.48583	6.57373	3.25879	5.07253	5.52363	4.02544	4.01043	2.28887	3.54849	5.29685	2.97359	3.14079	3.22713	6.15934	4.32477	4.53022	3.92459	4.58889	3.51196	5.13765	4.49188	3.69761	7.10622	2.42688	3.44359	4.44424	4.31362	12.1637	7.11572	12.4918	9.23442	7.35747	12.841	10.2177	3.76241	15.7612	5.30502
ENSG00000231846.1	0	0	0	0	0	0	0	0	0	0	0	0	0	0	0	0	0	0	0	0	0	0	0.0616995	0	0	0	0	0	0	0	0	0.0858476	0	0	0.0604405	0	0.0610526	0	0.0662185	0	0	0	0	0	0	0	0	0	0
ENSG00000233725.6	0	0	0	0.00787514	0.00397769	0.00297578	0.00412981	0.00763566	0.00887706	0	0	0	0.00543435	0.0050444	0.0149035	0	0	0.00285075	0.0172989	0.00863069	0.00918381	0.00415416	0.0232569	0.00662334	0.00320115	0.00369937	0	0.00273823	0.00312966	0	0	0.00647184	0	0.00416076	0.00455646	0	0	0.00829659	0.00998411	0	0	0	0.00538719	0	0	0	0	0	0
ENSG00000213300.5	1.25447	0.825016	0.982809	1.53495	0.550866	0.686856	1.14387	1.70368	1.04725	1.83677	1.34605	0.722607	0.445984	0.491604	0.687991	0.869378	0.783435	1.30137	0.443651	0.841106	0.918564	1.21453	0.596449	1.00219	0.837391	0.493348	0.519057	1.43259	1.31633	0.658331	0.957282	0.464737	0.82241	0.682928	1.28541	0.502671	1.32204	0.872379	0.512107	2.1568	0.96755	1.90492	2.56978	2.72173	0.556535	2.40649	1.41541	1.11164	1.981
ENSG00000202164.1	0	0	0	0	0	0	0	0	0	0	0	0	0	0	0	0	0	0	0	0	0	0	0	0	0	0	0	0	0	0	0	0	0	0	0	0	0	0	0	0	0	0	0	0	0	0	0	0	0
ENSG00000252975.1	0	0.273375	0	0	0	0	0	0	0	0.204946	0	0	0	0	0	0	0	0	0	0.242035	0.257546	0	0	0	0	0	0	0	0	0	0	0	0	0	0	0	0	0	0	0	0	0	0	1.56639	0	0	0.407295	0	0
ENSG00000225050.1	0	0	0	0	0	0	0	0	0	0	0	0	0	0	0	0	0	0	0	0	0	0	0	0	0	0	0	0	0	0	0	0	0	0	0	0	0	0	0	0	0	0	0	0	0	0	0	0	0
ENSG00000185074.7	0	0	0.0159417	0	0	0	0	0	0	0.021281	0	0	0	0	0	0	0	0	0	0	0	0	0.0270893	0	0	0	0	0	0	0.0266963	0	0	0	0	0.0265365	0	0	0	0	0	0	0	0	0	0	0	0	0	0
ENSG00000253563.2	0	0	0	0	0	0	0	0	0	0	0	0	0	0	0	0	0	0	0	0	0	0	0	0	0	0	0	0	0	0	0	0	0	0	0	0	0	0	0	0	0.166895	0	0.0156608	0	0	0	0	0	0
ENSG00000254660.1	0	0	0	0	0	0	0	0	0	0	0	0	0	0	0	0	0	0	0	0	0	0	0	0	0	0	0	0	0	0	0	0	0	0	0	0	0	0	0	0	0	0	0	0	0	0	0	0	0
ENSG00000204386.9	16.8672	13.9626	22.3553	16.7532	8.59388	24.1566	15.9094	13.2123	16.3863	8.56334	10.8366	25.7699	18.353	16.7932	22.6983	20.4302	18.9597	20.1979	17.822	12.2234	23.7827	19.0839	10.8259	14.239	23.1464	10.542	18.4814	15.4537	23.5404	10.9828	16.6287	14.225	23.3303	15.0224	11.9263	24.6866	11.525	13.1929	21.1649	28.1361	49.0864	35.4063	21.4162	17.3038	54.9281	46.802	31.8916	22.2169	17.2225
ENSG00000180929.5	0.00662059	0.022958	0.0257862	0.0741867	0.0843103	0.0490576	0.0194521	0.0359653	0.0209063	0.0344226	0.0169326	0.0270845	0.0255967	0.01188	0.0263243	0.0479011	0.00817534	0.0335689	0.0407406	0.0508151	0	0.0391337	0.0438176	0.054595	0.015078	0.0522741	0.0238326	0.00644879	0.0221119	0.0863639	0.0313955	0.060967	0.03684	0.00979897	0.107309	0	0.0541978	0.00976961	0.0352702	0	0.115892	0	0.0380619	0	0	0	0.0171023	0.0378082	0.0067879
ENSG00000131737.5	0	0	0	0	0	0	0	0	0	0	0	0	0	0	0	0	0	0	0.0127445	0	0.0135318	0	0	0	0	0	0	0	0	0	0	0	0	0	0.0134274	0	0	0	0	0	0.314196	0	0	0	0.0491916	0	0	0	0.0169872
ENSG00000252603.1	0	0	0	0	0	0	0	0	0	0	0	0	0	0	0	0	0	0	0	0	0	0	0	0	0	0	0	0	0	0	0	0	0	0	0	0	0	0	0	0	0	0	0	0	0	0	0	0	0
ENSG00000185115.4	7.51605	9.85971	8.69644	6.84112	11.4285	7.86478	7.92304	7.09012	7.57523	7.93009	5.9809	5.38351	9.892	9.9719	7.17098	8.35573	8.34338	7.78811	11.8282	7.76238	5.97642	8.00801	14.1637	7.58347	7.31074	7.42656	8.27315	6.34599	6.31168	9.00527	7.96588	13.1115	8.05485	7.4971	10.5738	11.9427	12.461	9.0918	9.31676	3.72038	8.40857	4.73274	4.21681	8.40132	13.0918	11.0605	9.6074	6.02434	5.51186
ENSG00000253087.1	0	0	0	0	0	0	0	0	0	0	0	0	0	0	0	0	0	0	0	0	0	0	0	0	0	0	0	0	0	0	0	0	0	0	0	0	0	0	0	0	0	0	0	0	0	0	0	0	0
ENSG00000179002.5	0	0.019788	0	0	0	0	0	0	0	0	0	0	0	0	0	0.0206435	0	0	0	0	0	0	0	0	0	0	0.00684725	0	0	0	0.00902013	0	0	0	0	0	0	0.00842062	0	0	0	0	0	0	0	0	0	0	0
ENSG00000229116.2	0.0199803	0.0866064	0.00972753	0.027986	0.155491	0.0317253	0.0587047	0.0678374	0	0.0908987	0.0127752	0.0204346	0.0193121	0.107558	0.0132407	0.0602338	0.0493448	0.0506539	0.0614756	0.0613421	0.048955	0.103339	0.0826485	0.0353063	0.011376	0.0262931	0.0479496	0	0.0556097	0.0814494	0.0631658	0.229991	0	0.0147862	0.372425	0.0870673	0.114495	0.0737094	0.0354807	0	0	0	0	0	0.0296606	0	0	0.0142627	0.0102426
ENSG00000249647.2	0	0	0	0	0	0	0.00869433	0	0	0	0	0	0	0	0	0	0	0	0	0.00908494	0	0.0087456	0	0	0	0	0	0	0	0	0	0	0	0	0	0	0	0	0	0	0	0	0	0	0	0	0	0	0
ENSG00000221112.1	0	0	0	0	0	0	0	0.165546	0.192461	0	0	0	0	0	0	0	0	0	0	0	0	0	0	0	0	0	0	0	0	0	0	0	0	0	0	0	0	0	0	0	0	0	0	0	0	0	0	0	0
ENSG00000265132.1	0	0	0	0	0	0	0	0	0	0	0	0	0	0.295786	0	0	0	0	0	0.253036	0	0	0	0	0	0	0	0	0	0	0	0	0	0	0	0	0	0	0	0	0	0	0	0	0	0	0	0	0
ENSG00000263745.4	0.0153256	0.0265721	0	0	0	0	0.0112572	0	0.0120987	0	0	0	0	0	0.0203122	0.0092403	0	0	0.023577	0	0	0.0566177	0	0	0	0.0100839	0	0.0298559	0.0341237	0	0.0242252	0.0176412	0	0	0	0	0	0	0.0136075	0	0.11178	0.0613535	0	0	0.273009	0	0.376097	0.01094	0.180699
ENSG00000263489.1	0.0288959	0	0	0.0809477	0.286203	0	0	0.039243	0	0	0.0369514	0.0295529	0	0	0	0.0348444	0	0	0.0889069	0	0	0	0.334677	0	0	0.152102	0.0693455	0.028146	0	0.329821	0	0.133047	0	0.042768	0.515189	0	0.189239	0	0	0	0	0	0	0	0.0857913	0	0	0	0
ENSG00000207590.1	0.659351	0	0.38521	0	0	2.79183	0.387451	0	0.208207	0.171409	0.505899	0.269737	0.25492	0	0.174778	0.318034	0.651352	0.401179	0.405739	0.202429	1.07701	0.389736	0.436384	0.155348	0.300326	0	0.316468	0.770689	0.734048	0.645079	1.25068	0.910765	0.55034	0.390355	1.28244	1.14929	0.215904	0.389186	0.234173	0	0	0	0.252708	0	0	1.32051	0	0	0
ENSG00000186838.12	0	0	0	0	0.0118572	0.00887062	0	0	0	0	0	0	0	0	0	0	0	0	0.0128918	0	0	0	0	0	0	0.0110276	0	0.0081625	0	0	0	0.0385843	0	0	0	0	0	0	0.014881	0	0	0	0	0	0	0	0	0	0
ENSG00000162735.17	16.5543	13.1475	16.7111	17.9905	15.9929	15.1038	13.1795	12.9214	15.017	14.5396	15.2065	15.3377	17.0913	17.6853	16.4156	14.5315	14.3024	15.1913	22.3757	11.5204	15.9236	14.8669	22.8497	13.4568	15.4071	12.7387	16.3093	15.146	18.3537	13.1016	15.0651	18.9843	18.8628	13.6874	13.1497	26.7863	17.5153	13.5168	18.1947	5.49323	14.5904	12.679	6.64258	11.0157	9.15215	9.37765	9.42447	9.35894	11.8952
ENSG00000151365.2	0.0370674	0.0214229	0.024062	0.0692261	0.0349657	0.915548	0.0363029	0.889352	0.0195084	0.0481814	0.0316007	1.94606	0.0238852	2.83793	0.147385	0.163893	0.0152574	0.150357	0.0570246	3.56578	0.0605475	0.0912924	0.163551	0.160111	0.0422094	0.0162596	0.059304	0.0240703	0.536468	0.141031	0	0.0568905	0	0.109725	7.89052	0.0430738	0.242754	0	0.394942	0.108715	0	0	0	0	0	0.0412424	0.0478762	0.0176401	0.0886763
ENSG00000272829.1	0.293787	0.445705	0.143032	0.617252	0.259808	0.466482	0.48554	0.847848	0.463854	0.429607	0.42265	0.112675	0.567924	0.790758	0.584067	0.752816	0.49882	0.372402	0.677943	0.338236	0.299927	0.54267	0.668385	0.692181	0.585446	0.628238	0.616912	0.643866	0.531488	0.359285	0.348291	0.591805	0.408691	0.597886	0.297612	0.960164	0.841753	0.216762	0.652127	0.969354	0.749971	0.882092	0.914867	2.18899	0.436124	2.20642	1.23323	0.314574	0.0753027
ENSG00000278996.1	0.301961	0.110751	0.197899	0.325346	0.156114	0.313494	0.307107	0.331225	0.275054	0.173605	0.304457	0.350399	0.269411	0.27092	0.292462	0.196066	0.258142	0.294433	0.348403	0.17828	0.104338	0.231688	0.480407	0.300994	0.317398	0.359156	0.118454	0.192312	0.17455	0.179906	0.220296	0.28074	0.395828	0.266435	0.59296	0.141706	0.209163	0.205654	0.299044	0.204374	0.0677659	0.0464941	0.300457	0.173068	0.103444	0.116298	0.067502	0.853912	0.148842
ENSG00000212216.1	0	0	0	0	0	0	0	0	0	0	0	0	0	0	0	0	0	0	0	0	0	0	0	0	0	0	0	0	0	0	0	0	0	0	0	0	0	0	0	0	0	0	0	0	0	0	0	0	0
ENSG00000275747.1	2.42471	0.663796	1.57398	0.714998	0.0601902	0.315206	2.49968	1.55982	1.34327	1.6588	1.30555	0.348048	0.904556	1.06864	1.29674	1.17981	2.31125	1.7255	0.523534	0.979495	0.486392	3.08017	0.63346	0.851906	1.64695	0.335873	1.8886	1.74026	0.994517	0.346817	3.56377	0.391727	1.71611	0.818487	0.413689	0.667328	0.348233	1.31821	1.20863	0.374286	1.48926	0.340593	0.326075	0	0.505187	0	0.109886	0.78951	0.915889
ENSG00000202459.1	0	0.232875	0	0	0	0	0	0	0	0	0	0	0	0	0	0	0	0	0	0	0	0	0	0	0	0	0	0	0	0	0	0	0	0	0	0	0	0	0	0	0	0	0	0	0	0.896641	0	0	0
ENSG00000185608.7	9.52284	9.67622	10.3076	8.6855	10.0796	9.3615	9.35896	8.40132	9.1145	12.2437	9.23233	7.07426	16.0399	9.8553	8.74688	10.0233	9.42554	8.78102	16.3875	8.14763	6.75256	9.8614	19.0787	8.76587	10.3395	9.47152	9.00846	8.758	9.68122	8.06486	11.5054	13.1879	12.1588	8.87189	11.8693	17.5253	10.515	9.68409	12.6108	12.7956	21.946	7.21086	13.7928	14.0808	12.4928	15.8931	8.91488	12.8578	6.8193
ENSG00000252870.1	0	0	0	0	0	0	0	0	0	0	0	0	0	0	0	0.112128	0	0	0	0	0	0	0	0	0	0	0	0	0	0	0	0	0	0	0	0	0	0	0	0	0	0	0	0	0	0	0	0	0
ENSG00000268869.4	0.00456442	0.00791394	0.0177777	0.0255732	0.00645842	0.222257	0.00670541	0.0743864	0.00720667	0.00593297	0.0116738	0.0046682	0.0352942	0	0	0	0.0112726	0.0324006	0.00702191	0.08408	0.00745571	0.00674495	0	0.00537704	0.00519759	0	0.0109539	0.0222298	0.0152446	0.0223281	0	0	0.0317482	0.00675568	0.0221945	0.00795605	0.00747308	0.0202063	0.00810541	0.200805	0.026633	0.0182728	0.139952	0	0.0135517	0	0.0471631	0.0065165	0.173151
ENSG00000266708.1	0.167374	0.451419	0.0362163	0.156291	0.210511	0.0787438	0.245882	0.227308	0.176175	0.0725192	0.166471	0.0950997	0.0719006	0.166853	0.0985925	0	0.068893	0.150871	0.114439	0.342572	0.0607545	0.0824441	0.153853	0.0876319	0.148238	0.0978911	0.13389	0.0362289	0.0828157	0.151621	0.146982	0.128441	0.0517414	0.1101	0.120571	0.0972474	0.182688	0.10977	0	0.327261	0.0542561	0.521151	0.0712766	0.554263	0	0.248301	0.240199	0.292056	0.152536
ENSG00000261240.1	0	0.0551546	0	0	0	0.0336733	0	0.0864035	0.0502254	0	0	0.0325341	0	0	0	0	0	0	0	0	0	0.0470076	0	0	0.0362236	0.0837227	0.0381704	0.0309853	0	0	0	0	0	0	0	0	0.0520821	0	0	0	0.0928065	0.254698	0	0	0	0	0.12326	0.0454154	0.097844
ENSG00000217811.1	0	0	0	0	0	0	0	0	0	0	0	0	0	0	0	0	0	0	0	0	0	0	0	0	0	0	0	0	0	0	0	0.0698634	0	0	0	0	0	0	0	0	0	0	0	0	0	0	0	0	0
ENSG00000186529.13	1.04461	0.9528	0.805041	1.56025	0.119086	8.69682	1.05458	1.37497	1.22722	0.936314	0.740719	1.10634	0.980965	1.31922	2.79853	1.18802	1.0729	1.53626	0.963457	1.72894	2.26025	1.10835	0.225266	1.79922	1.09086	0.77202	2.05839	0.969279	1.81333	0.742685	1.21298	0.763633	1.04339	1.48015	0.605839	1.67843	1.21179	1.30038	2.27259	0.457383	3.89255	3.57742	1.18592	3.68878	5.29889	0.305715	3.6384	8.20956	0.335007
ENSG00000160218.11	3.665	3.74909	3.36283	3.0219	1.43525	2.82514	3.68875	3.48928	4.52072	2.91486	4.2207	3.51849	2.63951	2.69425	3.39719	3.23734	3.68114	4.64296	2.48927	3.6307	4.47454	3.94925	2.0562	3.88961	3.25351	2.91263	3.81465	4.05266	3.86382	3.30202	3.92106	2.37715	3.01817	4.48953	2.79789	2.91571	2.04857	4.90629	2.83455	2.89659	2.35681	3.03462	3.64322	2.96882	2.10629	2.68429	2.98896	2.09332	1.36505
ENSG00000244259.1	0.0239368	0	0	0.0670557	0	0.0506767	0	0	0.0755868	0.0311138	0	0	0.0462727	0	0	0.0288645	0	0.0728213	0	0	0	0.0707441	0	0.0281984	0	0.0314996	0.0287223	0	0	0	0	0.0551068	0	0	0.0387976	0.0834466	0	0.0706442	0	0	0	0.0958269	0	0	0	0.239696	0.0309167	0	0.0245417
ENSG00000108759.3	0	0	0	0	0.0117285	0	0	0	0	0	0	0	0	0	0	0	0	0	0	0	0	0	0	0	0	0	0	0	0	0.0135159	0	0	0	0	0	0	0	0	0	0	0.0725482	0.132734	0	0	0	0	0	0	0.0169969
ENSG00000116147.15	0.0223854	0.0485156	0.0403242	0.00627095	0.0728506	0.0260657	0.0213756	0.00912037	0.0141375	0.010184	0.0028626	0.0354863	0.0108184	0.024101	0.0237352	0.0134968	0.0276422	0.0158903	0.015497	0.0566988	0.0457065	0.0396953	0.0148155	0.00791122	0.0152944	0.0751178	0.0107443	0.0250751	0.0112146	0.0292011	0.0442307	0.0334978	0.00778516	0.0546678	0.0272122	0.0039019	0.049478	0.17177	0.0298137	0.00984812	0.00653083	0.0268848	0.0042898	0	0.0166154	0	0.00289129	0.0031959	0.00229511
ENSG00000139364.9	0.0812904	0.16657	0.0296825	0.0439921	0.326767	0.0625818	0.176417	0.0991084	0.132723	0.0492297	0.029532	0.0670779	0.0410717	0.142553	0.0636648	0.0478986	0.0239544	0.061826	0.0724764	0.066647	0.0875161	0.0286662	0.151316	0.0783514	0.0326088	0.345234	0.168482	0.0710828	0.134721	0.23799	0.0321239	0.0978256	0.025701	0.0615251	0.190151	0.0499149	0.158804	0.132223	0.0360885	0.0406393	0.00269501	0.0295847	0.0141618	0	0.0466244	0.0185004	0.00596559	0.0118694	0.0435665
ENSGR0000226179.4	0	0	0	0	0	0	0	0	0	0	0	0	0	0	0	0	0	0	0	0	0	0	0	0	0	0	0	0	0	0	0	0	0	0	0	0	0	0	0	0	0	0	0	0	0	0	0	0	0
ENSG00000159409.13	0.307172	0.402272	0.458191	0.30209	0.721306	0.577673	0.398449	0.465983	0.448872	0.314321	0.238191	0.294104	0.284266	0.568783	0.41145	0.413753	0.290533	0.36783	0.447419	0.381236	0.373642	0.352509	0.702894	0.465798	0.27164	1.50508	0.435241	0.257822	0.189176	0.671382	0.299593	0.737256	0.290936	0.546532	0.58262	0.290494	0.652722	0.853508	1.16058	0.0287523	0.0858027	0.26164	0.0876707	0.0649283	0.213444	0.0109076	3.55802	0.00466534	0.482453
ENSG00000279716.1	0.314392	0.363403	0.272113	0.244646	0.457207	0.452978	0.641475	0.593016	1.50295	0.238383	0.156348	0.187566	0.337643	0.42311	0.115747	0.0842475	0.323519	0.371954	0.241831	0.442394	0.513542	0.593637	0.462394	0.19547	0.34806	0.769986	0.272456	0.255195	0.301397	0.313284	0.455547	0.301578	0.413059	0.736763	0.594507	0.167446	0.271668	0.644347	0.806423	1.38312	0.50957	9.85915	0.987402	0.69408	0.544498	0.641306	2.95528	0.760552	1.54901
ENSG00000006453.12	22.98	30.2141	17.8777	23.0873	2.31001	12.1323	22.2025	19.1375	22.645	28.5536	28.3812	26.7306	19.4793	15.4395	19.0452	21.8776	30.0266	20.0996	14.5391	17.7655	25.2893	18.8577	14.7568	27.1033	19.4511	16.9523	22.2233	18.9529	21.366	22.3564	27.192	11.2615	20.5282	22.0244	15.1662	18.4073	15.0179	20.2899	16.541	26.0424	13.839	17.3076	23.4005	33.1888	24.5226	19.6177	23.0426	20.3685	29.1029
ENSG00000138166.5	11.7765	19.3991	9.38204	27.8312	2.36252	47.1573	19.6474	9.03262	12.4367	32.9728	11.3142	21.2633	5.98356	19.7582	11.9323	17.8397	16.0285	15.188	4.20712	10.1245	21.0847	8.5414	8.47152	22.1592	10.8393	11.3584	17.0529	16.8255	17.0692	15.0239	23.2887	7.44517	9.29861	26.4449	6.99496	12.3183	15.1125	9.26604	3.32946	12.2995	4.79031	6.57325	8.44035	4.6291	12.1214	39.7903	3.43187	16.52	8.0134
ENSG00000196098.2	0	0	0	0	0	0	0	0	0	0	0	0	0	0	0	0	0	0	0	0	0	0	0	0	0	0	0	0	0	0	0	0	0	0	0	0	0	0	0	0	0	0	0	0	0	0	0	0	0
ENSG00000186297.10	0	0	0.00680037	0	0	0.0480538	0	0	0	0.004539	0	0	0.00675042	0.0125321	0	0	0	0	0	0.00536042	0	0.0154806	0	0.00411368	0.00397639	0.00459527	0	0.00340137	0	0.02847	0	0.00803917	0	0.0051684	0	0	0.00571725	0.0669879	0	0	0	0	0.00669183	0	0	0	0	0	0
ENSG00000077454.14	2.27195	1.90523	2.42498	1.93136	1.07757	2.93717	2.77358	2.78012	3.85174	2.4458	1.88806	2.77055	2.51379	2.22302	1.895	2.59385	2.60903	2.24155	2.35297	2.3446	2.37012	2.87144	1.66021	2.68394	1.87693	2.52637	2.26799	2.13241	1.89406	1.76065	2.7295	1.59697	2.51723	3.45999	2.06644	1.60107	1.66017	3.08025	2.90439	3.15439	1.76384	2.67511	2.65051	2.97152	2.04062	2.44288	3.25776	2.61972	2.99708
ENSG00000172146.1	0	0	0	0	0	0	0	0	0	0	0	0	0	0	0	0	0	0	0	0	0	0	0	0	0	0	0	0	0	0	0	0	0	0	0	0	0	0	0	0	0	0	0	0	0	0	0	0	0
ENSG00000277274.1	0	0	0	0	0	0	0	0	0	0	0	0	0	0	0	0	0	0	0	0	0	0	0	0	0	0	0	0	0	0	0	0	0	0	0	0	0	0	0	0	0	0	0	0	0	0	0	0	0
ENSG00000174840.8	3.9365	7.70228	3.78092	5.14589	2.34452	3.08234	3.62269	4.25839	4.30819	4.58783	4.60475	3.64463	3.86441	4.34061	3.58424	3.39202	5.49157	4.301	3.85604	5.51764	4.74838	3.91478	3.58662	5.00786	4.36626	3.82543	4.13792	4.06965	4.29041	4.48102	3.4905	3.35552	3.41469	4.5857	3.29006	5.11791	4.06929	4.82317	3.95008	5.592	5.46321	5.18596	6.08962	5.68573	4.48627	6.007	3.25836	7.08061	6.24846
ENSG00000136478.6	5.74072	6.04563	4.2634	5.1074	5.59728	4.32758	4.80138	6.46413	5.3643	5.55863	5.99691	5.2285	4.73624	5.06329	5.56851	5.19717	5.15462	5.07422	5.88933	6.21444	4.04892	5.32233	5.96201	6.16897	4.92232	4.91808	5.62135	4.94851	5.38243	6.1304	4.63173	5.4752	4.449	6.28929	6.84864	5.16307	4.91233	6.35048	6.24856	2.47011	5.5052	5.47888	7.08855	4.51626	5.54087	2.20423	4.89918	3.96699	3.90042
ENSG00000151025.9	0.163344	0.21485	0.0767827	0.13149	0.12486	0.0655859	0.223414	0.191237	0.085967	0.0780947	0.0936365	0.072968	0.054442	0.141499	0.111979	0.101881	0.0625975	0.1447	0.0317722	0.100874	0.208544	0.0915571	0.0963027	0.050871	0.177451	0.469436	0.123908	0.131673	0.0982405	0.293901	0.0474847	0.246376	0.052237	0.0889238	0.191718	0.0425442	0.14755	0.124674	0.0900198	0.115638	0.00547758	0.668952	0.0215878	0.0932619	0.0278716	0.401086	0.531075	0.0348463	0.211746
ENSG00000232453.4	1.05686	0.463139	1.11955	0.943504	0.821652	1.72114	0.938382	0.410088	1.35693	0.588747	0.326735	0.938358	1.81853	1.1462	2.03184	0.770259	1.34807	1.23662	1.55441	0.873572	2.06779	1.21851	0.845516	0.834573	1.89117	1.23794	1.14273	1.06337	2.14631	0.587062	0.550741	0.828852	0.904749	1.22045	0.621197	1.25511	0.570443	1.01113	1.73239	0.102187	0.203298	0.325458	0.356098	0.346137	0.827553	0.0387659	0.390011	0.215551	2.00044
ENSG00000199331.1	0.568852	0.246573	0	0.39839	0	0.451619	0	0.386274	0.224537	0	0	0.145447	0	0	0.376971	0.342978	0.175609	0.144215	0	1.09153	0.464593	0.210152	0	0	0.161941	0.187145	0.170644	0	0.158324	0.231891	0	0	0.197835	0.420971	0.230503	0	0.465676	0.41971	0.252539	0	0.4149	1.70797	0.272528	0	0	0	1.65314	0.203034	0.291613
ENSG00000251566.1	0	0	0	0	0	0	0	0	0	0	0	0	0	0	0	0	0	0	0	0.0372361	0	0	0	0	0	0	0.0291066	0	0	0	0	0	0	0	0.0393166	0	0	0	0	0	0	0	0	0	0	0	0.0313303	0	0
ENSG00000259562.2	0.333945	0.904694	0.162583	0.233875	0.206725	0.331404	0.367939	0.850359	1.31815	0.189906	0.373662	0.192115	0.242083	0.74904	0.304289	0	0.309275	0.571464	0.160544	0.929134	0.477294	0.555163	0.17267	0.319636	0.142601	1.15357	0.651149	0.284619	0.325305	0.510494	0.329916	0.528549	0.116139	0.772285	0.710415	0.181902	0.307547	0.523581	0.407696	0	0.487134	2.75733	0.999924	0	0.185902	0.48767	0.970474	0.446966	0.813161
ENSG00000226989.1	0.0365383	0	0	0	0.0516999	0	0	0	0.115379	0	0.0467245	0	0	0	0	0	0	0	0	0	0	0.107987	0	0.0430434	0	0.19233	0.0438431	0	0.0406777	0.0595791	0	0	0	0	0.0592225	0	0	0	0	0	0	0.146275	0	0	0	0	0	0	0
ENSG00000272702.1	0.0200771	0.0348104	0.0293239	0	0.0497142	0.0159395	0.0147473	0.0136332	0.0158497	0.0130484	0.0256742	0.00513341	0.0194057	0.00900662	0.0199573	0.0121051	0.0247919	0	0.04633	0.0308196	0.0163974	0.0445027	0.0332195	0.0236515	0.00571555	0.0330255	0.0180682	0.00977806	0.0223516	0.0081844	0.0396699	0.0346658	0.0069824	0.0445734	0.0569479	0.0262467	0.00821781	0.0148133	0.0178263	0.0441632	0.0439306	0.120563	0.0865678	0.398916	0.104315	0.150785	0.149106	0.0214977	0.0463151
ENSG00000212061.2	0	0	0	0	0	0	0	0	0	0	0	0	0	0	0	0	0	0	0	0	0	0	0	0	0	0	0	0	0	0	0	0	0	0	0	0	0	0	0	0	0	0	0	0	0	0	0	0	0
ENSG00000152380.8	0.158634	0.113254	0.0999473	0.274478	0.171646	0.128411	0.13023	0.158411	0.213632	0.272909	0.107396	0.100208	0.279601	0.184188	0.0989413	0.0618883	0.149796	0.13721	0.308643	0.222027	0.083833	0.186155	0.270196	0.164891	0.122198	0.239454	0.179152	0.122705	0.171412	0.190197	0.140127	0.225567	0.0973583	0.227885	0.370555	0.195183	0.0916673	0.185893	0.273415	0.205262	0.176956	0.149427	0.384467	0.092704	0.221639	0.436063	0.216944	0.552874	0.363555
ENSG00000164691.15	2.67836	1.41468	5.08809	3.33911	0.848301	1.16036	5.32094	1.73441	4.07758	3.55058	3.08934	2.05717	2.13275	4.26498	2.56246	2.67362	4.20097	2.62253	3.75475	2.3634	2.02812	3.70625	4.34943	2.77908	3.02566	2.08207	3.43091	3.35869	2.19981	1.78742	5.28229	2.40109	2.32931	3.48112	2.02397	3.11648	3.4268	6.39172	3.26948	1.34218	1.55245	0.568071	3.7934	2.25555	2.58045	1.97748	0.462776	1.87393	0.261874
ENSG00000211707.3	0	0	0	0	0	0.040408	0.0560784	0	0	0.0496184	0	0.0390409	0.0737927	0	0	0	0	0	0	0	0	0.0564091	0	0	0.0434683	0	0.0458045	0.0371823	0.0849951	0	0.06034	0	0	0	0.061872	0	0	0.0563295	0	0	0	0	0.0731523	0	0.113335	0	0	0.0544985	0
ENSG00000175087.8	3.55686	2.5511	3.01797	3.70964	1.77867	3.1218	3.34566	4.34833	3.70687	2.79811	3.59949	2.68905	4.72404	3.63317	3.67129	2.83882	3.08476	4.75517	5.00441	3.90351	2.44518	4.54233	3.55121	2.85243	4.57112	3.34211	3.27005	4.231	3.39006	2.94683	3.7617	3.22533	3.20374	2.77897	2.94994	2.86574	2.70225	4.0828	4.8678	1.0976	2.92086	2.40736	3.10159	3.68612	2.67805	3.65142	2.32593	3.89986	4.97164
ENSG00000215481.7	0.0369102	0.246842	0.0359399	0.0886276	0.0373044	0.0334897	0.038731	0.143221	0.0999032	0.0685387	0.0472001	0.0647134	0.0509655	0.151387	0.0978399	0.0317919	0.123712	0.128331	0.0730065	0.0890363	0.0602907	0.132462	0.0261735	0	0.0300217	0.166532	0.10756	0.102721	0.105665	0.0171959	0.0666788	0.0364173	0.036676	0.16389	0.0427324	0.0459548	0.0690642	0.163399	0.0936351	0.0463946	0.0461503	0.189982	0.171779	0.157152	0.0156551	0.0176004	0.0749149	0.203255	0.0810921
ENSG00000088247.14	37.3944	54.6443	38.6153	28.6668	35.0223	32.7493	41.7743	49.0794	35.1899	44.2222	39.9287	30.045	29.8603	41.7789	35.3627	40.5384	41.6184	42.5017	35.0018	46.8523	31.6131	43.9138	28.4089	45.5012	39.1717	45.5445	39.6445	38.6071	35.5046	40.8833	39.557	33.4313	35.5821	42.398	41.4785	27.9164	35.5019	48.0315	41.3397	78.5705	55.7772	110.657	65.4831	65.1219	35.8563	44.8321	68.3521	58.1162	49.206
ENSG00000083307.9	7.17387	4.58602	6.67761	6.63181	0.535137	2.66559	6.06943	7.03153	8.24274	5.04667	6.14954	4.56818	7.12599	5.54085	6.83363	6.42813	6.64169	7.86955	6.19388	7.14313	5.68505	8.19217	4.71309	8.96427	7.71928	5.90933	8.08533	7.43303	5.7641	4.633	6.06904	3.5599	7.19589	9.09444	4.13194	5.64517	5.06734	8.1912	8.9859	8.52984	14.7491	9.71684	7.94946	8.56089	7.29158	7.60636	12.7253	10.1394	14.2808
ENSG00000281420.1	0.439567	0.508091	0.998693	0.410462	0.414644	0.310203	0.645752	0.795959	1.15671	0.190454	0.18737	0.149854	0.56649	0.788761	0.194197	0	0.542793	1.04009	0	1.1246	1.19668	0.866079	0.242435	0.345217	0.834239	0.192816	0.879077	0.57088	0.489366	0.716755	0	0	0.611489	1.30118	0.474977	0	0.239894	1.5135	0.520384	0	0.427473	7.62549	5.05416	0	2.17511	1.46723	4.7312	1.67349	0.901351
ENSG00000001461.15	7.66625	5.29005	7.60739	6.93971	8.43562	8.169	6.19761	6.64487	7.06275	5.07665	7.46009	6.36395	6.81053	6.45192	7.63788	7.92381	7.19991	7.93371	5.71892	8.02935	6.67188	7.20518	4.35154	8.51504	7.55287	5.76276	7.37392	7.31556	6.82437	6.49675	6.60762	6.95309	7.55752	7.87871	6.9554	3.87439	7.11423	7.14948	6.31101	4.58736	3.41114	3.71744	7.74758	6.20628	3.76449	2.89873	2.9984	6.11109	6.08556
ENSG00000239744.3	0	0	0	0	0	0	0	0	0	0	0	0	0	0	0	0	0	0	0	0	0	0	0	0	0	0	0	0	0	0	0	0	0	0	0	0	0.156246	0	0	0	0	0	0	0	0	0	0	0	0
ENSG00000169057.18	2.2933	2.42699	2.35741	1.85617	4.95381	2.2705	2.33499	2.78149	2.45566	2.06291	1.79205	1.87392	1.68585	2.80796	2.49574	2.35394	2.23804	2.20005	2.16808	3.31693	2.02334	2.60321	2.0443	2.08368	2.00872	2.78917	2.70512	2.02587	2.0628	4.27641	2.30672	2.97227	1.7298	2.66842	3.52156	1.22549	2.90762	2.56324	2.63367	1.31961	1.565	2.70024	1.68338	1.55303	2.95439	1.67929	2.68529	2.6204	2.33254
ENSG00000255555.1	0	0	0	0	0	0	0	0	0	0	0	0	0	0	0	0	0	0	0	0	0	0	0	0	0	0.0455579	0	0	0	0	0	0.079701	0	0	0	0	0	0	0	0	0	0	0	0	0	0	0	0	0
ENSG00000154920.13	0.339083	0.542102	0.26585	0.296071	0.149544	0.223753	0.420503	0.705707	0.584042	0.692609	0.625079	0.355801	0.544821	0.426707	0.128404	0.254891	0.440463	0.392978	0.352281	0.425875	0.38843	0.501072	0.378888	0.575833	0.421223	0.596886	0.417441	0.274522	0.338277	0.258502	0.696089	0.344693	0.318553	0.462762	0.713763	0.491256	0.360496	0.747298	0.383179	2.16982	1.55455	1.60427	2.99582	2.84367	1.26822	3.13089	2.47987	1.23854	1.15132
ENSG00000168710.16	29.3292	28.5937	25.6051	30.1291	31.9494	46.7558	26.0819	33.9442	28.0406	30.1613	29.876	22.2635	26.2479	30.0763	27.6858	25.6956	27.9105	29.3968	29.9099	27.7719	24.0511	31.996	29.8312	29.3504	32.0958	29.0494	31.9008	29.7536	28.6091	30.134	28.2657	32.2452	24.6783	28.2215	35.9269	25.2497	27.7998	31.6913	33.5275	35.3714	24.4003	17.82	40.1066	32.2433	23.9131	35.5777	20.0327	22.8966	31.8301
ENSG00000232892.1	0	0.00955203	0	0	0	0.00583177	0.00809335	0	0	0.00716103	0	0	0	0	0	0	0	0	0	0	0	0	0	0	0	0	0	0	0	0	0	0	0	0	0	0	0	0	0	0	0	0	0	0	0	0	0	0	0
ENSG00000177992.9	0.00971799	0	0.00315417	0.0181491	0.0275009	0.003429	0.0237939	0.0263957	0.0664887	0	0.00414239	0.00331299	0.018786	0.00581267	0.00429333	0.0117186	0.0440004	0.0295643	0.00498339	0.0298354	0.0687863	0.028721	0	0.0152642	0.0184434	0.0554162	0.00777388	0.00631054	0.0468821	0.0264101	0.025602	0.0074575	0.0405565	0.0143833	0.0262521	0.0112927	0.0159108	0.0143402	0.0115047	0	0.0189012	0	0	0	0	0	0	0	0
ENSG00000199212.1	0	0	0	0	0	0	0	0	0	0	0	0	0	0	0	0	0	0	0	0	0	0	0	0	0	0	0	0	0	0	0	0	0	0	0	0	0	0	0	0	0	0	0	0	0	0	0	0	0
ENSG00000267808.1	0.0245444	0	0.0238991	0	0	0	0.0360572	0	0	0.0159518	0	0.0125512	0	0.0220213	0	0	0.0151541	0.0124449	0	0.0188386	0.0400918	0	0	0.0289141	0.0139746	0	0.0147257	0.0119537	0.0136625	0	0.0193986	0	0	0	0.0198912	0	0	0.0181093	0	0	0.0358035	0	0	0	0	0	0	0.0175207	0.0125823
ENSG00000181718.5	0	0	0	0	0	0	0	0	0	0	0	0	0	0	0	0	0	0	0	0	0	0	0	0	0	0	0	0	0	0	0	0	0	0	0	0	0	0	0	0	0	0	0	0	0	0	0	0	0
ENSG00000115758.11	28.4689	94.9753	27.1209	31.8322	26.9908	15.4896	30.22	29.4305	35.4654	64.2772	29.9494	23.238	28.5514	27.8094	21.5445	29.4203	49.2947	24.6321	39.1727	32.7631	27.0871	27.4877	48.5036	55.1337	30.448	32.8844	29.6624	29.5963	30.0455	38.4918	37.9552	33.0121	23.8369	60.0178	35.5601	73.2377	37.1125	41.2526	25.759	61.6227	104.145	98.9634	83.1595	167.317	131.93	65.1563	57.1598	54.6135	63.8987
ENSG00000273111.4	0	0	0	0	0	0	0	0	0	0	0	0	0	0	0	0	0	0	0	0	0	0	0	0	0	0.00881698	0	0.00652623	0	0	0	0	0	0	0	0	0	0	0	0	0	0	0.0128397	0	0	0	0	0	0
ENSG00000108001.12	0.20709	0.527709	0.189425	0.193378	1.15877	0.222537	0.207428	0.630672	0.0198164	0.35891	0.0802493	0.189335	0.109181	0.529253	0.253679	0.317828	0.0813661	0.0763654	0.168948	0.56836	0.220388	0.204015	0.368609	0.184818	0.128628	0.706074	0.252257	0.155871	0.300415	0.552566	0.0495981	0.960739	0.0567443	0.232204	1.12395	0.0820387	0.760311	0.129644	0.250737	0.0828239	0.100696	0.200981	0.222479	0.031172	0.214265	0.0942608	0.0851063	0.0671948	0.102945
ENSG00000166741.6	4.52714	20.5581	8.00332	6.61253	4.20482	5.23934	6.35863	23.5671	6.83396	15.1667	3.28543	2.67843	3.20856	6.2955	3.1812	5.46509	7.15505	1.66803	3.15737	7.12489	4.65118	2.67301	18.4839	1.94943	3.43487	12.4119	8.47329	2.75422	2.40659	4.63496	3.14992	9.18669	2.61313	3.72168	13.8539	22.5645	10.6502	4.29717	7.16557	6.12142	18.311	9.27068	12.0753	6.96104	18.1623	8.07806	3.78049	19.7233	5.53826
ENSG00000229596.3	0.140017	0.145659	0.0818014	0.235342	0	0	0.0411386	0.114093	0.0884278	0.291197	0.0716202	0.0572801	0.0541337	0	0.111345	0.0675363	0.138318	0.170385	0	0.0859737	0.0457418	0.0413812	0.139003	0.164944	0.0956638	0	0.0672036	0.136383	0.0623516	0.045662	0.132794	0	0.155823	0	0	0.0488115	0	0.0413228	0	0	0	0.224213	0	0	0	0.0934722	0	0.0399796	0.028711
ENSG00000198825.10	3.04597	2.08458	2.81368	2.75628	4.46603	1.55497	2.46194	3.1751	3.17227	3.0658	2.19891	3.09172	2.79079	3.20517	2.05052	2.25094	2.27096	2.38715	2.94948	3.49005	2.77872	2.71086	2.96305	3.22266	2.6701	2.90718	2.62327	2.55939	2.43644	3.32865	2.6563	3.98514	1.66294	3.035	4.0204	1.81919	3.62829	3.84005	3.97611	1.3552	1.77059	2.24554	3.33046	2.32948	2.64819	1.13565	1.97451	2.25802	1.77006
ENSG00000236432.6	0.127104	0.19283	0.0850866	0.133524	0.118024	0.0967048	0.128372	0.221166	0.175597	0.118747	0.142221	0.0771839	0.284098	0.10691	0.184253	0.0957935	0.176571	0.161116	0.2322	0.103653	0.0843442	0.11739	0.236594	0.191845	0.131167	0.156808	0.185877	0.135412	0.172457	0.161917	0.106735	0.17374	0.165765	0.146971	0.135197	0.235396	0.195094	0.175837	0.232762	0.104845	0.0811168	0.127209	0.121787	0.236761	0.566053	0.0265162	0.0256511	0.136097	0.350224
ENSG00000225871.2	0.0431975	0.0299589	0.0757113	0.145214	0.0611223	0.0731628	0.152304	0.0821322	0.259174	0.0449196	0.198864	0.106031	0.116908	0.108519	0.0458023	0.0312541	0.0640101	0.087611	0.0797462	0.079573	0.0987848	0.114901	0.100064	0.0508881	0.0393519	0.12506	0.145134	0.0925683	0.0480913	0.05635	0.122908	0.0795585	0.0480742	0.0895097	0.0980223	0.0451775	0.042435	0.0892415	0.0767094	0	0	0.41504	0.115893	0.0858299	0.179554	0.0865133	0.390556	0.123344	0.20373
ENSG00000248406.1	0	0	0	0	0	0	0	0	0	0	0	0	0	0	0	0	0	0	0	0	0	0	0	0	0	0	0	0	0	0	0	0	0	0	0	0	0	0	0	0	0	0	0	0	0	0	0	0	0
ENSG00000164008.12	3.59714	3.24985	3.64348	3.47479	2.7789	3.69834	3.18888	3.34104	3.80807	3.42167	2.8199	3.19264	4.60915	3.47467	3.69897	3.53162	3.92281	3.56392	5.77768	3.04653	3.50067	3.41134	4.43536	3.17411	3.83718	3.65452	4.28321	2.97353	3.88958	2.69677	3.86692	3.58537	3.86327	3.72275	3.35079	5.24905	3.36216	3.5794	4.61337	4.36555	3.47806	6.92439	3.47308	3.423	3.58041	3.40425	4.78847	2.77438	4.23207
ENSG00000271010.1	0	0	0	0	0	0	0	0	0	0	0.0192224	0	0	0	0	0	0	0	0	0	0	0	0	0	0	0	0	0	0	0	0	0	0	0	0	0	0.0246108	0	0	0	0	0	0.0288061	0	0	0	0	0	0
ENSG00000231393.1	0.0213634	0	0	0	0.0604562	0.0226142	0.0313841	0.0580265	0.0674604	0.0277688	0	0.0436982	0.0412978	0.076669	0.0283145	0	0	0.0649922	0	0.0655882	0	0.0947075	0.0353477	0	0	0.0562261	0	0.0416179	0.0237836	0.104505	0	0	0	0.094858	0	0.0372376	0.0349771	0.220672	0.0379367	0	0	0	0.0409394	0	0.190282	0.0713087	0.0551857	0.0304999	0
ENSG00000233655.1	0	0	0	0	0	0	1.33186	0	1.43143	0	0	0	0	0	0	0	1.11951	1.83874	0	1.3917	1.48089	0	0	0	1.03237	0	0	0.883081	1.00932	0	2.86615	0	0	2.68369	0	0	0	2.67565	0	0	0	0	0	0	0	0	0	0	0
ENSG00000215796.3	0	0	0	0	0	0	0	0	0.0558151	0	0	0.0120516	0	0	0.0156178	0	0	0	0	0.0723548	0	0.017413	0.0194972	0	0.0134183	0.0155067	0.0141395	0	0.0131187	0.0192144	0	0	0	0.0174407	0.0190994	0	0	0	0	0.311044	0.0343784	0.0471739	0	0.117066	0	0.0786655	0.0304396	0.0336465	0.0241629
ENSG00000276326.1	0	0	0	0	0	0	0	0	0	0	0	0	0	0	0	0	0	0	0	0.322713	0	0	0	0	0	0	0	0	0	0.342796	0.332307	0	0	0	0	0	0	0	0	0	0	0	0	0	0	0	0	0	0
ENSG00000279358.1	0	0	0	0	0	0	0	0	0	0	0	0	0	0	0	0	0	0	0	0	0	0	0	0	0	0	0	0	0	0	0	0	0	0	0	0	0	0	0	0	0	0	0	0	0	0	0	0	0
ENSG00000280162.1	0.0277583	0.123759	0.0231674	0.133305	0	0.0965462	0.0815575	0.0861673	0.288007	0.0670079	0.0354968	0.101391	0.0536601	0.0569254	0.0262788	0.0334727	0.0587605	0.068362	0.0427035	0.0973961	0.24614	0.0703186	0.0262451	0.070072	0.0406401	0.229608	0.0999235	0.100427	0.0662209	0.0581947	0.0689505	0.0182584	0.0717137	0.704304	0.0128548	0.0276483	0.10388	0.0877742	0.0140837	0	0	0.0317502	0.0835912	0.0393954	0.0588672	0	0.0307308	0.0113228	0.0365912
ENSG00000126821.7	10.8267	17.7997	7.87246	10.3921	4.47432	7.37617	8.47373	9.40984	10.4695	8.9436	11.1791	9.47827	7.18811	6.51514	6.48978	6.3218	9.92416	9.14039	7.41159	7.5972	9.90122	7.00924	11.3339	9.4625	7.13184	7.4407	7.76741	7.56804	8.82542	5.52044	13.4377	7.81428	6.52532	8.39464	7.06334	16.1081	7.78741	11.2067	8.72633	3.35264	3.88442	4.73405	5.43872	7.48389	7.00883	8.74225	7.30302	4.20817	3.97852
ENSG00000253393.1	0	0	0	0	0	0	0	0	0	0	0	0	0	0	0	0	0	0	0	0	0	0	0	0	0	0	0	0	0	0	0	0	0	0	0	0	0	0	0	0	0	0	0	0	0	0	0	0	0
ENSG00000184735.6	0	0	0	0	0	0	0	0.00542849	0	0	0	0	0	0	0	0	0	0	0	0	0	0	0	0	0	0	0	0	0	0	0	0	0	0	0	0	0	0	0	0	0	0	0	0	0	0	3.43838	0	0
ENSG00000131871.13	25.3908	24.8166	25.4584	30.5901	7.59736	26.9834	28.4282	18.7166	35.1326	36.959	26.8541	32.4838	35.4052	19.318	23.1105	30.4366	29.7363	25.6779	33.3194	22.8052	28.6583	22.8926	34.4211	29.8386	24.8208	18.5008	26.8157	28.5287	28.5846	19.7024	31.7757	21.6188	24.2996	30.9444	19.0413	47.2789	22.0089	27.6119	28.3992	15.0813	25.3289	11.1948	21.0366	38.3039	22.7344	20.6737	18.4172	20.3795	10.7455
ENSG00000267220.1	0	0	0	0	0	0	0	0.0696113	0	0	0.0655464	0	0	0	0.203804	0	0	0	0.0788538	0	0.0837252	0	0	0.0603824	0	0	0.0615043	0.0499268	0.0570638	0.0835792	0	0	0	0.0758641	0.083079	0	0	0	0	0	0	0	0	0	0	0	0	0	0.0525523
ENSG00000106665.14	23.1933	16.1733	22.5874	18.9041	9.08537	10.5481	23.3694	21.7764	20.7518	13.4936	19.0822	22.1489	14.1835	19.247	24.0431	23.7713	23.314	24.7585	10.4211	13.5369	21.4819	23.0882	5.98469	17.8755	21.9103	17.4891	22.6715	24.6929	23.7236	12.3842	19.6128	10.984	25.255	18.5463	11.7734	10.6771	13.3114	15.1343	9.61693	10.9224	8.42346	9.57399	14.7787	20.0353	8.57812	3.71331	17.8698	28.0901	11.9487
ENSG00000178522.13	0	0.0250378	0.00703055	0	0	0	0.0212143	0	0	0	0	0.00738455	0	0.0129563	0	0.00870677	0	0.021966	0	0	0	0	0	0	0	0.00950163	0	0.014066	0	0	0	0.0166225	0.0100444	0	0	0	0	0	0	0	0	0	0	0	0	0	0	0	0
ENSG00000248443.1	0	0	0	0	0	0	0	0	0	0	0	0	0	0	0	0	0	0	0	0	0	0	0	0	0	0	0	0	0	0	0	0	0	0	0	0	0	0	0	0	0	0	0	0	0	0	0	0	0
ENSG00000101353.13	0.478786	0.350213	0.305943	0.387706	1.1538	0.340519	0.318713	0.391155	0.407502	0.374377	0.363531	0.279266	0.520621	0.624216	0.361904	0.369865	0.369514	0.341385	0.615723	0.470838	0.311606	0.381394	0.600337	0.42302	0.332233	0.521766	0.421902	0.265972	0.287335	0.677017	0.538049	0.680294	0.53596	0.310029	0.430455	0.508555	0.64916	0.358777	0.445037	0.427852	0.425599	0.344413	0.0645129	0.074321	0.777387	0.337107	0.681205	0.160207	0.203257
ENSG00000234825.3	0.262727	0.11043	0.178299	0.111514	0.13518	0.151696	0.116958	0.421679	0.238833	0.27941	0.152714	0.113994	0.138513	0.128574	0.094967	0.172807	0.147466	0.226058	0.122479	0.0488851	0.0780271	0.247061	0.237113	0.15944	0.181317	0.104768	0.162402	0.124077	0.168404	0.0908728	0.302031	0.183286	0.265806	0.094268	0.180658	0.138772	0.169453	0.117482	0.0848266	0.490352	0.603905	0.191233	0.289879	0.790935	0.070912	1.88678	0.0925466	0.113663	0.0653009
ENSG00000248712.6	0.419962	0.393591	0.326032	0.572334	0.337263	0.216268	0.575265	0.500978	0.716833	0.339331	0.399151	0.377273	0.548538	0.407342	0.345999	0.33533	0.49756	0.621545	0.532572	0.30491	0.528393	0.41093	0.554016	0.367704	0.284346	0.537712	0.476682	0.436703	0.341177	0.296124	0.457507	0.431152	0.647374	0.579577	0.423131	0.55396	0.288041	0.703457	0.493815	0.399473	0.331141	0.272634	0.271888	0.169141	0.286441	0.0757725	0.388491	0.210659	0.320022
ENSG00000234576.1	0	0	0	0	0	0	0	0	0	0	0	0	0	0	0	0	0	0	0	0	0	0	0	0	0	0	0	0	0	0	0	0	0	0	0	0	0	0	0	0	0	0	0	0	0	0	0	0	0
ENSG00000261638.1	0	0	0	0	0	0	0	0	0	0	0.0336044	0	0	0	0	0.0316882	0	0	0	0.0403391	0	0	0	0	0	0	0	0	0	0	0	0	0	0.0388941	0	0	0	0.0387775	0	0	0	0	0	0	0	0	0.0339412	0	0
ENSG00000226544.4	0.0593686	0	0.0192693	0	0.0280012	0	0.029072	0.107503	0.0312453	0	0.0506129	0	0.0382554	0	0	0	0	0.0200681	0.0304443	0	0.032325	0.0292435	0	0	0	0.026042	0	0	0	0	0	0.0455589	0.055059	0	0.0320755	0	0	0	0	0	0	0.0792238	0.11377	0	0	0.132111	0.0511202	0	0
ENSG00000230666.4	0.0320316	0.0396695	0.0133669	0.166645	0.0194242	0.0678141	0.0537787	0.0870031	0.158947	0.0297397	0.163845	0.0514798	0.00884582	0.0410554	0.0545835	0.0606974	0.0169516	0.0742455	0.0140793	0.0772678	0.104643	0.0946676	0.022714	0.0323437	0.0573178	0.0541952	0.0823615	0.0668578	0.101887	0.0223845	0.0867982	0	0.133679	0.0880454	0.0593346	0.063809	0.0374597	0.0540194	0.0325035	0	0.0133501	0.0549569	0.0263071	0	0.0407576	0	0.0413719	0.00653295	0.0797567
ENSG00000249363.1	0.331181	0.229685	0.225732	0.556654	0.0937209	0.385629	0.291915	0.382306	0.653619	0.236764	0.232929	0.270969	0.0320105	0.207995	0.21947	0.319487	0.490744	0.285466	0.305694	0.559221	0.622109	0.415985	0.0273985	0.253592	0.320554	0.457607	0.496739	0.338716	0.3687	0.243009	0.314098	0.114365	0.437675	0.441155	0.134197	0.259771	0.21689	0.366527	0.205837	0	0.193241	0.132582	0.0951982	0.329014	0.14749	0.0552724	0.705791	0.0945637	0.186752
ENSG00000238311.1	0	0	0.135811	0	0	0.147645	0	0	0.220219	0	0.178362	0	0	0.25028	0	0	0	0	0	0	0.227829	0	0.23078	0	0	0.183546	0.167363	0	0	0	0	0	0	0	0	0	0.22836	0.205819	0	0	0	0	0	0	0	0	0	0	0
ENSG00000250464.1	0	0	0	0	0	0	0	0	0	0	0	0	0	0	0	0	0	0	0	0	0	0	0	0	0	0	0	0	0	0	0	0	0	0	0	0	0	0	0	0	0	0	0	0	0	0	0	0	0
ENSG00000280075.1	0	0	0	0	0	0	0	0	0	0	0	0	0	0	0	0	0	0	0	0	0	0	0	0	0	0	0	0	0	0	0	0	0	0	0	0	0	0	0	0	0	0	0	0	0	0	0	0	0
ENSG00000238232.1	0	0	0	0	0	0	0	0	0	0	0	0	0	0	0	0	0	0	0	0	0	0	0	0	0	0	0	0	0	0	0	0	0	0	0	0	0	0	0	0	0	0.319072	0	0	0	0	0	0	0
ENSG00000224407.1	0	0	0	0	0	0	0	0	0	0	0	0	0	0	0	0	0	0	0	0	0	0	0	0	0	0	0	0	0	0	0	0	0	0	0	0	0	0	0	0	0	0	0	0	0	0	0	0	0
ENSG00000280107.1	0.0778482	0	0.0336896	0.0726936	0.0734342	0.100719	0.127071	0.0822301	0.163884	0.0449731	0.0442448	0.0265395	0.117048	0.0310425	0.0687855	0.0730133	0.0747675	0.0526293	0.106455	0.0796679	0.0989026	0.0383461	0.186055	0.0917078	0.0590982	0.102444	0.124549	0.0337013	0.0866676	0.0423129	0.0136727	0.0796534	0.0601644	0.153628	0.154219	0	0.0566475	0.0510559	0.0768008	0.0761071	0	0	0.116032	0	0	0.259849	0.335162	0.0123491	0.00886839
ENSG00000259435.2	0	0	0	0	0	0	0	0	0	0	0	0	0	0	0	0	0	0	0	0	0	0	0	0	0	0	0	0	0	0	0	0	0	0	0	0	0	0	0	0	0	0	0	0	0	0	0	0	0
ENSG00000006704.9	2.83953	2.84482	2.14322	2.21377	2.62483	3.42877	2.52189	3.49858	2.29099	2.06308	1.87552	0.888124	2.01959	2.3113	2.3344	2.37425	1.98473	2.87497	2.93283	2.98129	1.42574	2.74128	1.82465	3.15046	2.3844	3.35772	3.03221	1.89826	2.32618	3.94943	2.98877	2.65698	2.50298	2.38881	4.01263	1.84049	1.60815	2.60894	2.92554	6.34426	17.6886	13.2085	9.34724	7.49594	10.5647	5.40965	17.6168	6.45377	14.3962
ENSG00000276445.1	0.0745157	0.0861318	0.0967422	0.139164	0.281163	0.131464	0.218936	0.168664	0.352954	0.0968578	0.0952892	0.101613	0.0480158	0.445704	0.296284	0.119807	0.276044	0.176317	0.191059	0.30503	0.162289	0.367046	0.0821956	0.0585213	0.141421	0.294176	0.149022	0.12097	0.11061	0.162006	0.157049	0.285914	0.138213	0.25734	0.161037	0.0432951	0.406669	0.109958	0.176432	0.874189	0.144931	0.0994368	0.571189	0.246761	0.442471	0.0829086	0.320814	0.709228	0.40746
ENSG00000238009.5	0.00389311	0	0	0.010906	0	0	0	0.0105743	0	0.0151812	0	0.00398163	0	0	0	0	0	0	0	0	0	0	0	0.00458621	0	0.00512313	0.00467142	0	0	0.00634807	0.00615383	0	0	0	0	0	0	0.1666	0	0	0	0.0155854	0.014921	0	0	0	0.00502833	0.00555809	0
ENSG00000116761.10	3.64746	3.77153	3.64519	5.26884	0.756716	5.66114	2.93959	4.0314	4.21245	2.55409	3.16589	3.33708	5.21562	3.0946	4.09359	3.55055	4.21463	5.21001	4.33556	3.34838	4.02429	2.9214	1.8493	5.40113	4.56399	2.75182	3.59795	3.84546	4.10082	2.29278	3.36244	2.96042	4.17125	5.14059	2.41542	3.49833	2.51858	4.37149	3.79876	1.1103	6.06572	2.04476	3.25882	1.37303	1.60565	13.5588	12.7361	1.8273	3.77044
ENSG00000106785.13	22.4044	16.7486	18.7059	18.516	4.93137	19.4037	25.4556	16.1303	16.9018	21.0408	29.7086	19.4389	13.5412	13.3929	18.6982	17.4791	17.5617	17.8595	12.9226	13.5338	16.1471	19.2602	13.2272	22.2125	16.9982	17.0504	16.3364	19.5263	20.1324	10.1852	20.3004	9.91033	17.8362	15.9422	17.2563	11.1096	11.0431	14.775	12.3826	16.0561	8.26431	16.9892	22.7049	19.1565	10.4183	19.247	26.8443	16.1465	12.8328
ENSG00000251789.2	0	0	0	0	0	0	0	0	0	0	0	0	0	0	0	0	0	0	0	0	0	0	0	0	0	0	0	0	0	0	0	0	0	0	0	0	0	0	0	0	0	0	0	0	0	0	0	0	0
ENSG00000221518.1	0	0.18225	0	0	0.297462	0.111268	0	0.428261	0	0	0.403253	0.215008	0	0	0	0.126753	0	0	0	0.645425	0.68679	0.310659	0	0.247655	0	0.691622	0.378385	0.102386	0	0	0.166153	0.483981	0	0.311153	0.170372	0	0	0.15511	0.373319	0	0	0.420805	0.201434	1.04426	0	0	0.135765	0	0.21554
ENSG00000231484.1	0	0	0	0	0	0	0	0	0	0	0	0	0	0	0	0	0	0	0	0	0	0	0	0	0	0	0	0	0	0	0	0	0	0	0	0	0	0	0	0	0	0	0	0	0	0	0	0	0
ENSG00000265538.1	0	0	0	0	0	0	0	0	0	0	0	0	0	0	0	0	0	0	0	0	0	0	0.347842	0	0.23939	0	0	0	0	0	0	0	0.292451	0	0	0	0	0	0	0	0	0	0	0	0	0	0	0	0
ENSG00000224535.1	0	0	0	0	0	0	0	0	0	0	0	0	0	0	0	0	0	0	0	0	0	0	0	0	0	0	0.0484839	0	0	0	0	0	0	0	0	0	0	0	0	0	0	0	0	0	0	0	0.0521882	0	0.082854
ENSG00000271723.4	0.0122756	0.0461151	0.0139451	0.0229257	0.0231592	0.0454804	0.0270505	0.0472355	0.0355333	0.0239344	0.0130815	0.0104623	0.0237302	0.0220275	0.0108466	0.0123356	0.0151584	0.0248969	0.0220324	0.0471097	0.0334192	0.0211634	0.0135408	0.00723056	0.0116488	0.0242312	0.0220947	0.0159428	0.0091109	0.0266887	0.0161701	0.00471011	0.019923	0.042394	0.026529	0.0035662	0.046896	0.0332098	0.0181657	0	0	0.0245717	0.0117621	0	0	0.00682914	0.0369954	0.00876281	0.125859
ENSG00000253484.1	0	0	0	0	0	0	0	0	0	0	0	0	0	0	0	0	0	0	0	0	0	0	0	0	0	0	0	0	0	0	0	0	0	0	0	0	0	0	0	0	0	0	0	0	0	0	0	0	0
ENSG00000178229.7	0.72152	0.776716	0.841517	0.810716	0.7741	0.495189	0.844471	0.672998	0.794932	0.515304	0.527237	0.462217	1.24151	0.768283	0.756621	0.435027	0.944807	0.936705	0.847738	1.11366	0.738219	0.673703	0.780577	0.471689	0.975096	0.693852	1.10361	0.756857	0.754712	0.665824	0.689317	0.9218	0.79415	0.563289	0.925289	0.483712	1.14885	1.05885	1.13342	0.802276	0.266017	2.19016	1.18515	1.81169	0.906307	1.07185	0.0819264	1.43195	0.0650332
ENSG00000136040.7	2.00119	1.40417	1.86287	1.62757	0.620708	0.782739	2.11007	1.93473	2.90484	2.34567	1.56472	0.96783	2.07041	1.85076	1.52256	1.54096	2.15591	2.12458	2.28867	1.77246	1.26535	2.8358	2.13624	1.60046	2.01316	0.961485	1.96644	1.99785	1.58926	1.11961	2.8618	1.4355	1.29602	1.67205	2.82745	1.73387	1.54454	2.42262	3.42602	1.03272	1.64793	1.21581	1.96528	1.54501	2.49596	1.77279	0.445317	3.33462	0.43773
ENSG00000259257.1	0	0	0.045198	0	0.0328398	0.0245681	0	0.03152	0	0	0	0.0474738	0	0.0416466	0.0307609	0	0.0573189	0	0	0	0.0758216	0.0342967	0.115205	0.0273412	0	0	0.0278492	0.0452137	0	0.0378446	0	0	0	0	0	0	0.0759983	0.0342483	0.0412144	0	0	0.0929137	0	0	0.0689076	0	0	0	0
ENSG00000272767.1	0.336837	0.395626	0.327982	0.547898	0.199868	0.989164	0.46291	0.368914	0.39458	0.39546	0.250107	0.344496	0.420093	0.194975	0.331226	0.471691	0.483025	0.319541	0.484759	0.166795	0.283976	0.289017	0.287654	0.486407	0.334071	0.300273	0.299874	0.571522	0.374997	0.637831	0.309158	0.550325	0.408117	0.402051	0.35223	0.397731	0.373587	0.352745	0.328017	0.573625	0.190201	0.173996	0.187401	0.107946	0.12904	0.942984	0.0842047	0.496406	0.155964
ENSG00000152254.9	0.00464183	0	0.0045198	0.0650172	0.0131359	0.0147408	0.0272765	0	0.0366445	0.0362016	0.0296794	0.0474738	0.0269196	0.00832932	0	0.0503767	0.0286595	0.0329502	0.007141	0.057004	0.0151643	0	0	0.0164047	0.0422859	0.0855177	0.0501285	0.00452137	0.0103354	0.00756893	0.0733734	0	0	0.0343513	0	0.024273	0	0.0136993	0.0824288	0	0	0	0.00889532	0.0461147	0	0.015494	0	0	0.00951826
ENSG00000259802.1	0.37029	0.558279	0.407584	0.541209	0.501162	1.00549	0.662236	0.80899	0.889676	0.648729	0.247054	0.444573	1.08928	0.520005	0.405422	0.621244	0.735572	0.636721	1.80804	0.247138	0.447061	0.618559	1.01226	0.739668	0.641651	0.6144	0.521592	0.595908	0.555628	0.446281	0.661663	1.03779	0.582306	0.643371	0.547989	1.796	0.395385	0.974044	0.714734	0.283311	1.73788	1.03123	1.57346	2.07925	0.908188	1.61216	1.72592	0.459699	0.808815
ENSG00000211450.8	15.4686	19.5857	21.9801	9.34358	8.99354	18.7391	18.5086	17.2898	18.3918	23.5667	15.564	14.2305	33.5278	20.0441	18.6333	18.0914	21.3003	19.3622	18.5399	14.6258	13.425	20.5892	33.2371	18.0372	19.6137	16.4967	15.7444	17.2187	17.4872	13.6992	21.3177	17.8347	20.6957	20.7244	18.8295	49.2743	15.6819	21.3773	25.7702	23.4776	57.9992	18.5928	35.6126	31.51	50.9707	36.1512	28.587	27.7533	33.3513
ENSG00000111647.11	3.59354	3.1172	3.20232	3.89405	2.97822	3.22837	2.84732	3.37068	3.40634	3.48544	3.46544	3.08775	2.92873	2.48252	2.63857	2.91091	2.62889	3.4418	3.46405	3.17718	3.54196	3.05527	3.83815	3.15109	3.20322	2.77849	3.45431	3.10306	3.11216	3.54293	3.50037	3.57872	3.02565	2.83946	2.91404	3.90577	3.04407	2.97978	3.15369	0.733072	2.19403	1.63259	2.13022	2.02571	3.11808	3.39574	2.62796	2.09411	1.76013
ENSG00000260440.2	0.00280683	0	0	0	0	0.00297118	0	0.00381192	0.00443166	0	0	0	0	0.0050366	0.00372011	0	0	0	0	0.00430866	0.0045848	0	0	0	0	0.00369365	0.00336798	0	0.00312482	0.0045768	0	0	0	0	0	0	0	0	0	0	0	0	0	0	0	0	0	0	0
ENSG00000144579.6	38.7944	34.8553	44.1569	32.8301	33.729	41.2705	41.5737	37.0078	41.0186	33.8528	32.92	40.8284	40.1725	39.6687	45.3165	46.5624	41.2166	41.2387	40.255	34.0579	33.8246	42.549	25.5751	37.2565	36.2158	40.124	41.6493	40.8844	37.8087	33.1351	37.7577	38.0009	48.3667	44.1563	35.936	28.1514	38.0534	40.6504	42.9408	32.9407	20.1527	26.339	26.0278	24.4804	24.9001	21.9917	52.5087	47.1625	30.5878
ENSG00000211934.3	200.297	222.736	85.6946	53.6938	1.03363	13.293	33.8299	118.105	310.314	287.527	160.586	60.6586	146.998	247.433	111.019	432.096	435.519	359.705	20.4961	207.827	86.7652	319.013	9.32417	171.743	333.845	35.0647	429.842	147.527	132.717	16.903	612.875	153.84	353.885	144.829	44.0344	204.761	42.7718	199.628	127.436	17.4461	60.8918	0.417777	226.649	17.6248	10.741	1.9739	0.494223	41.9652	0
ENSG00000172531.13	96.7351	84.3019	93.7595	72.6827	33.1457	79.7205	107.091	76.3438	88.1644	108.373	106.159	99.9799	114.958	80.5741	93.6739	103.906	100.654	100.159	119.53	71.2615	83.3712	91.6483	94.5437	94.6376	86.1358	79.9109	80.666	94.3707	95.0537	58.9011	113.935	73.8354	123.747	87.0027	68.7475	152.219	69.286	91.282	82.5029	93.7346	143.803	55.2007	68.1976	95.4166	106.628	122.609	99.1097	85.3663	88.2627
ENSG00000240439.3	0	0	0	0.139642	0	0	0	0	0.0787038	0	0	0	0	0	0	0	0	0	0	0	0	0	0	0	0	0	0	0	0	0	0	0	0	0	0	0	0	0	0	0	0	0	0.0955254	0	0	0	0	0	0
ENSG00000259696.2	0.0308961	0.0267843	0	0	0	0	0.0226941	0	0	0	0.0197547	0.0157993	0	0	0	0.0186282	0	0.031331	0	0	0	0.022828	0	0.0363967	0	0	0.0370729	0.0150472	0	0.0503789	0.0244187	0	0	0.0228643	0	0.0269269	0	0	0.0274324	0.271846	0.090138	0	0	0	0	0.154692	0	0	0
ENSG00000235347.1	0	0.0412641	0	0	0	0.0125964	0	0	0	0	0.0152171	0	0.0230035	0	0	0	0	0	0	0.0182668	0.0194374	0	0	0	0	0.0156594	0.0142787	0.0231818	0	0.0194035	0	0	0	0.0176124	0	0	0.0389655	0	0	0	0	0.0476383	0	0	0	0	0	0	0
ENSG00000199085.2	0.522729	0	0.38174	0.366088	0	0	0.38396	0.70991	1.03166	0.509594	0.167114	0	0.757871	0.234497	0	0	0.484113	0.397565	0.804167	0.601816	0	0.772449	0.432453	0	0.14881	0	0.313617	0.254582	0.145487	0.426178	0.413138	0.300853	0.181794	0.193419	0.847256	0	0	0.385679	0	2.29967	0	4.1853	1.75302	1.29827	0.775986	0	1.18152	0	2.81368
ENSG00000232950.1	0	0	0	0	0	0	0	0	0	0	0	0.00912396	0	0	0	0	0	0	0	0	0	0	0	0	0	0	0	0	0	0	0	0.0205379	0	0	0	0	0	0	0	0	0	0	0	0	0	0	0	0	0
ENSG00000207101.1	0	0	0	0	0	0	0	0	0	0	0	0	0	0	0	0	0	0	0	0	0.232296	0	0	0	0	0	0	0	0	0	0	0	0	0	0	0	0	0	0	0	0	0	0	0	0	0	0	0	0
ENSG00000137547.7	38.9986	46.162	36.1589	43.8088	27.918	30.0268	35.7668	35.2152	38.0944	48.4435	37.878	28.7618	55.2113	36.8691	40.6949	38.7142	40.8476	43.0428	63.8928	38.1029	31.5525	40.6212	53.8665	41.293	44.5749	41.4311	41.1979	39.3983	43.1591	32.1131	39.2164	41.6943	44.3907	41.4609	31.1511	99.0781	35.9931	38.0477	52.8373	21.9685	210.604	41.4445	47.7535	45.9791	71.7425	62.3629	60.5012	42.097	81.0296
ENSG00000254746.4	0	0	0	0	0	0	0	0	0	0	0	0	0	0	0	0	0	0	0	0	0	0	0	0	0	0	0	0	0	0	0	0	0	0	0	0	0	0	0	0	0	0	0	0	0	0	0	0	0
ENSG00000129009.11	9.98728	24.0017	14.833	6.29846	44.5922	12.5439	11.9194	17.539	10.6411	13.3347	4.86138	8.10373	9.50106	24.3725	16.807	17.1841	7.51091	10.7832	16.8934	15.4395	8.22335	11.5644	20.8651	8.33619	8.29298	23.8056	13.1178	11.1405	15.3208	28.2223	8.08659	39.5335	7.29803	10.0314	38.9244	9.05919	25.0743	11.8927	16.009	15.2432	26.9826	50.3094	28.2974	13.5422	41.2452	7.99424	6.47432	30.8122	15.6295
ENSG00000253670.1	0	0	0	0	0	0	0	0	0	0	0	0	0	0	0	0	0	0	0	0	0	0	0	0	0	0	0	0	0	0	0	0	0	0	0	0	0	0	0	0	0	0	0	0	0	0	0	0	0
ENSG00000252816.1	0	0	0	0	0	0	0	0	0	0	0	0	0	0	0	0	0	0	0	0	0	0	0	0	0	0	0	0	0	0	0	0	0	0	0	0	0	0	0	0	0	0	0	0	0	0	0	0	0
ENSG00000212270.1	0	0	0	0	0	0	0	0	0	0	0	0	0	0	0	0	0	0	0	0	0	0	0	0	0	0	0	0	0	0	0	0	0	0	0	0	0	0	0	0	0	0	0	0	0	0	0	0	0
ENSG00000213925.3	0.03327	0	0	0	0.0470754	0	0.0244378	0.112959	0.157588	0.151359	0.0638175	0.0340265	0	0	0.0220476	0	0	0.0168691	0.0255913	0	0	0	0.0550484	0.0195966	0.0378852	0	0.0598821	0.0324066	0.0185196	0.0271249	0.0525899	0.0765933	0.0231412	0	0.0269626	0.0579916	0.0817069	0	0.0590803	0	0.0485319	0.133191	0.127513	0	0	0.222104	0.107429	0.0474987	0.0170554
ENSG00000208008.1	0	0	0	0	0	0	0	0	0	0	0	0	0	0	0	0	0	0	0	0	0	0	0	0	0	0	0	0	0	0	0	0	0	0	0	0	0	0	0	0	0	0	0	0	0	0	0	0	0
ENSG00000273629.1	0	0.405653	0	0	0	0	0	0	0	0	0	0	0	0	0	0	0	0	0	0	0	0	0	0	0	0.307883	0	0	0	0	0	0	0	0	0	0	0	0	0	0	0	0	0	0	0	0	0	0	0
ENSG00000142632.15	1.32856	2.74674	2.47412	2.05078	0.63575	1.65236	2.1509	2.83007	3.32075	1.82257	1.26306	0.94282	2.14895	1.66114	2.36661	1.70015	3.06587	3.41332	2.97939	2.81833	1.11986	2.13496	2.07646	2.37273	1.53491	2.65051	1.74754	1.66382	1.52651	1.01054	1.89189	2.26495	1.68653	2.21861	1.99015	1.73513	2.51763	2.49775	2.70315	7.80445	4.06812	4.31075	4.20123	3.77106	4.09397	2.13326	7.41918	2.84789	6.56049
ENSG00000221879.3	0	0	0	0	0	0	0	0	0	0.0719656	0	0	0	0	0	0	0	0	0	0	0	0	0	0	0	0	0.066434	0	0.0616377	0	0	0	0	0	0	0	0	0	0	0	0	0	0	0	0	0	0.0715097	0	0
ENSG00000178358.4	0	0	0	0	0	0	0	0	0	0	0	0	0	0	0	0	0	0	0	0	0	0	0	0	0	0	0	0	0	0	0	0	0	0	0	0	0	0	0	0	0	0	0	0	0	0	0	0	0
ENSG00000212545.1	0	0	0	0	0	0	0	0	0	0	0	0	0	0	0	0	0	0	0	0	0	0	0	0	0	0	0	0	0	0	0	0	0	0	0	0	0	0	0	0	0	0	0	0	0	0	0	0	0
ENSG00000223668.1	0.326326	0.164263	0.379246	0.501312	0.208525	0.200574	0.2165	0.829172	0.681433	0.67046	0.269225	0.16149	0.244191	0.113334	0.320891	0.355423	0.233976	0.55509	0.194331	0.113113	0.154752	0.466665	0.487686	0.272816	0.311659	0.16623	0.44209	0.440899	0.257823	0.0686586	0.61566	0.266576	0.468601	0.155802	0.221805	0.201834	0.29299	0.170869	0.18693	0.0926209	0.061422	0.337132	0.302589	0	0.0625069	0.843285	0.271924	0.0901717	0.248231
ENSG00000013293.5	0.165043	0.197183	0.124241	0.16318	0.879161	0.154152	0.171147	0.231676	0.0481749	0.127995	0.0957721	0.102128	0.0268106	0.291176	0.165436	0.163898	0.0308269	0.0900118	0.0682762	0.202255	0.151785	0.0799295	0.252426	0.169918	0.0663308	0.660688	0.114829	0.105372	0.129699	0.515619	0.0438458	0.517252	0.0135055	0.0800566	0.451839	0.0556018	0.470039	0.116655	0.0960514	0	0.00404626	0.00555226	0.00797338	0.0137784	0.00823544	0	0	0	0
ENSG00000211751.6	0.365294	0.143017	1.02118	0.132041	0.0666933	0.149684	1.00404	0.112023	0.260471	0.612672	0.708231	0.289239	0.455585	0.465183	0.702802	0.454704	0.538384	0.334587	0.344433	0.470306	0.327215	0.661696	0.253464	0.5275	0.362294	0.325641	0.325208	0.43616	0.28861	0.230573	1.45286	0.271281	0.475382	0.645307	0.401087	0.451873	0.810298	0.817258	0.376655	0.518406	0.103135	0.0471739	0.88068	0.234132	0.31487	0.471993	0.0304396	0.521521	0.0724888
ENSG00000257332.1	0	0	0.045416	0.0871077	0	0.0164577	0	0.0422293	0.0981899	0.060627	0	0	0	0	0.0618184	0	0.0191985	0.0472987	0	0	0	0.0229748	0	0	0.0354082	0	0	0.0151439	0	0	0.0245758	0	0.0216282	0	0	0	0	0	0	0	0	0.124482	0.0297941	0	0	0	0	0	0.0159403
ENSG00000200737.1	0	0.222571	0.249989	0	0.363272	0	0	0.523009	1.0134	0.166858	0	0	0.248153	0.230346	0.170137	0	0.158515	0	0.394967	0.985273	0.629051	0.379389	0	0	0	0.675708	0	0.500152	0	0.627953	0	0	0	0.379992	0.624195	0.223755	0	0.56828	0.455912	1.12948	0	0	0.245999	0	0	0.428483	0.497404	0.549808	0.394839
ENSG00000177261.8	0	0	0.0424155	0	0	0	0	0	0	0	0	0	0	0.0781656	0	0	0	0	0	0	0	0	0	0	0	0	0	0	0	0	0	0	0	0	0	0	0	0	0	0	0	0	0	0	0	0	0	0	0
ENSG00000275558.1	0	0	0	0	0	0	0	0	0	0	0	0	0	0	0	0	0	0	0	0	0	0	0	0	0	0	0	0	0	0	0	0	0	0	0	0	0	0	0	0	0	0	0	0	0	0	0	0	0
ENSG00000169062.13	2.51563	4.75384	2.59877	3.33703	4.54804	3.34129	3.53317	3.66559	5.31701	2.8387	1.76434	2.08191	3.56102	3.26492	2.53476	2.95471	3.32362	3.13719	4.09043	3.60704	2.58617	3.68399	3.83386	3.40166	2.52691	4.27943	3.68198	3.13821	2.54882	3.24551	3.29319	3.50031	2.74439	4.82432	4.41143	3.59202	3.67022	4.58736	4.17267	1.70264	3.84192	7.05264	5.24461	3.02098	4.91706	3.26314	6.50486	5.11278	6.88475
ENSG00000279770.1	0	0.0292561	0.00547668	0	0.00795846	0.0119077	0.00826282	0	0.0088805	0.00731097	0.00719257	0	0	0.0504636	0.0149093	0	0.00694539	0.0114074	0	0.0259021	0.00918738	0	0	0.0265037	0	0.0296065	0	0	0.0125235	0	0	0	0	0	0.0364658	0	0	0.00829981	0	0	0	0.0450338	0	0	0	0	0	0.00803003	0.00576669
ENSG00000224223.1	0.0430721	0.066382	0.00931994	0.0670336	0.0203149	0.015198	0.0421837	0.051996	0.0982304	0.0311036	0.0183599	0.0195784	0.101766	0.0772887	0.0380578	0.069252	0.0768255	0.126182	0.0515373	0.00734648	0.0312692	0.091937	0.0475113	0.0451025	0.032698	0.0503828	0.040198	0.0559391	0.0479517	0.0546256	0.0605191	0.0330532	0.0665758	0.0566665	0.00775696	0.0500515	0.0548486	0.0635588	0.101982	0	0	0	0	0	0	0	0	0	0
ENSG00000179832.16	4.896	6.0852	4.86703	3.92456	2.2044	5.21083	5.67388	5.76382	6.99919	4.49628	4.15295	5.2713	4.37477	4.12293	4.962	6.16861	5.8946	5.82567	3.81513	4.62785	5.20261	6.26176	1.95038	5.17678	4.41317	5.9334	5.46134	4.94259	5.6284	4.04809	5.97677	2.76273	5.21922	8.76464	4.05405	3.21649	3.19549	5.5383	4.76765	11.2262	11.0079	11.2275	6.44784	7.70569	6.41486	5.58215	8.51975	5.08096	8.24025
ENSG00000102837.6	1156.26	645.934	7.5863	123.661	11.8317	522.156	378.023	1601.92	163.956	589.087	1046.25	8.81837	89.399	164.971	208.382	36.4208	75.377	58.4943	24.149	150.597	49.196	342.997	351.856	724.336	777.717	683.123	43.4993	173.887	362.493	67.9705	245.913	195.849	132.004	5.72867	1160.76	491.748	7.27158	77.4341	44.8493	74.6317	99.6713	4.51018	4356.09	41.1383	414.438	0.317554	0.530312	68.9195	106.632
ENSG00000146232.13	9.85782	7.08423	9.32504	7.19509	2.40159	7.00228	6.68769	5.61766	4.69414	8.98552	8.59564	6.04113	9.22395	6.38374	6.12297	5.39463	7.58543	5.7221	7.74692	5.72856	4.65439	8.52934	7.33703	6.24339	6.38702	6.04243	5.68501	6.61301	7.19544	4.77457	8.795	5.97766	8.88945	7.17869	5.93022	4.51611	4.28797	6.70934	8.00415	10.5329	11.0022	9.65226	8.71309	15.0194	14.6672	12.644	4.16668	11.803	4.58673
ENSG00000270872.2	0.0852442	0.0738996	0.0691693	0.1194	0.0804108	0	0.104357	0.212243	0.0448635	0.0369344	0.0363362	0	0.137322	0.254938	0.0376602	0.0685285	0.0877187	0.043222	0	0.109046	0.0928276	0.0209946	0.211567	0.0334735	0.129426	0.168265	0	0.0553547	0.0474507	0.0926656	0.0449151	0.0654157	0.0790564	0.0210279	0.253305	0.0742928	0.0697829	0.188684	0.0504584	0	0.0828987	0	0.0544523	0.423433	0	0.142268	0.0183502	0.324536	0.0145664
ENSG00000258774.1	0.0474043	0.301367	0.0461581	0	0	0.10036	0.0232133	0.0643791	0.0748458	0.0410784	0.0202066	0	0.030546	0.0567083	0.0209428	0	0.0390243	0.0160238	0.024309	0.194049	0	0.0233502	0.130725	0.0372293	0	0.0831754	0.0568814	0.0153914	0	0.0257657	0.0249773	0	0	0.0467746	0.128057	0.0550857	0.0517417	0.0466344	0.0280599	0.139032	0.0461	0	0.0605618	0	0.0469142	0	0.0204091	0.0676779	0.0324015
ENSG00000239900.10	6.95409	7.95777	7.23272	5.93086	6.96796	5.15288	7.45767	7.65333	8.42996	10.1305	7.29206	4.28577	10.8391	8.44375	6.7146	7.4912	7.31816	8.16462	13.6065	7.3934	4.39639	7.87464	13.4282	7.11504	7.96275	7.49383	7.86533	7.3958	6.70106	7.01776	7.92669	9.03056	8.41633	7.00657	7.58107	17.1405	7.32472	8.34241	9.89746	20.1011	28.6365	8.25904	11.9493	8.87883	14.5444	11.7006	7.88077	8.76254	6.44589
ENSG00000267398.1	0.0444961	0	0	0	0	0	0	0	0	0	0	0	0	0	0	0	0	0	0	0	0	0	0	0	0	0	0	0	0	0	0	0	0	0	0	0	0	0	0	0	0	0	0	0	0	0	0	0	0
ENSG00000237882.1	0	0.105232	0	0.085012	0.0429391	0.128494	0.0445812	0.12364	0.0479138	0.276119	0.194034	0.0931102	0.117327	0.0544542	0.0804416	0.0731878	0	0.215417	0.0466854	0.0465841	0.0991391	0	0.100423	0.142998	0	0.0399347	0.0728273	0.177355	0.101354	0	0.191876	0.139727	0.168863	0.134746	0.0491869	0.0528961	0.0496851	0	0	0.267012	0	0.242975	0.116309	0	0	0.101294	0.352761	0.129976	0.217795
ENSG00000235245.1	0.602474	0.522294	0.676887	0.843873	1.04919	1.05474	0.510618	1.66789	2.3415	0.512036	0.29632	0.402882	0.582326	1.0395	0.706369	0.251481	0.77257	1.08092	0.285184	1.06712	1.13551	1.40392	0.421745	0.65514	0.580503	1.73811	0.917554	0.473986	0.696525	0.982389	1.02559	0.480115	0.483526	1.74912	1.05163	0.484684	0.303507	1.53871	1.4402	4.48546	0.338017	3.06125	2.30909	1.61144	0.82557	1.0055	1.94538	1.52178	0.522668
ENSG00000258585.2	0	0	0	0	0	0	0	0	0	0	0	0	0	0	0	0	0	0	0	0	0	0	0	0	0	0	0	0	0	0	0	0	0	0	0	0	0	0	0	0	0	0	0	0	0	0	0	0	0
ENSG00000235570.1	0	0	0	0	0	0	0	0	0	0	0	0	0	0	0	0	0	0	0	0	0	0	0	0	0	0	0	0	0	0	0	0	0	0	0	0	0	0	0	0	0	0	0	0	0	0	0	0	0
ENSG00000163216.6	0	0	0	0	0.019418	0.014527	0	0.0931882	0	0	0	0	0	0.0246255	0	0	0	0	0	0	0.0224165	0	0.0227068	0	0	0	0	0	0	0	0	0	0	0	0	0	0	0	0	0.603745	0.800753	0.0549395	0.131494	0	0.285213	0	0.0354504	0	0.0281406
ENSG00000211864.2	0	0	0	0	0	0	0	0	0	0	0	0	0	0	0	0	0	0	0	0	0	0	0	0	0	0.636292	0	0	0	0	0	0	0	0	0	0	0	0	0	0	0	0	0	0	0	0	0	0	0
ENSG00000213820.3	0.154082	0.0763292	0.21433	0	0.0622909	0.0699016	0.258693	0.358725	0.312785	0.400561	0.0281481	0.0675367	0	0.0394979	0.0875214	0.0265431	0.108723	0.133929	0.0677258	0.101368	0.0359548	0.585491	0.0364205	0.181514	0.100261	0.0868988	0.132062	0.107203	0.196043	0.0717842	0.139176	0.152024	0.336829	0.032579	0.0356773	0	0.0360386	0.097444	0.156352	4.45452	1.99076	0	0.253091	1.53074	0.784229	8.89022	0.0568605	0.0942767	0.11284
ENSG00000271793.1	0	0	0	0	0	0.0183893	0	0	0	0.0225808	0	0	0	0	0	0.0209484	0	0.0352333	0.0801759	0	0	0	0	0	0	0	0	0	0	0.0283268	0	0.0399937	0	0.051424	0	0	0	0.025635	0	0	0	0.0695462	0.0332909	0	0	0	0.0224378	0.0248017	0
ENSG00000273530.1	0.216503	0	0	0	0	0	0	0.588059	0	0	0	0	0	0	0	0	0	0.219551	0	0	0.353645	0	0	0	0	0	0	0	0	0.353028	0	0	0.301181	0	0	0	0	0	0	0	0	0	0	0	0	0	0	0	0
ENSG00000265946.1	0	0	0	0	0	0	0	0	0	0	0	0	0	0	0	0	0	0	0	0	0	0	0	0	0	0	0	0	0	0	0	0	0	0	0	0	0	0	0	0	0	0	0	0	0	0	0	0	0
ENSG00000268797.1	0	0	0	0	0	0	0	0	0	0	0	0	0	0	0	0	0	0	0	0	0	0	0.0417411	0	0	0	0	0	0	0	0	0	0	0	0	0	0	0	0	0	0	0	0	0	0	0	0	0	0
ENSG00000237063.1	0	0.163315	0.0687875	0	0	0.024927	0.0691877	0.0319805	0.0743598	0	0	0	0.0455215	0.126765	0	0	0.0290782	0.0238797	0	0.072296	0	0.0695957	0	0.0554813	0	0.0619765	0.028256	0.0458743	0	0	0	0	0	0.0348531	0	0.041046	0.0385543	0.0694974	0	0	0.0687009	0	0	0	0	0	0.182489	0.0336192	0.0965733
ENSG00000236080.2	0	0	0	0	0	0	0	0	0	0	0	0	0	0	0	0	0	0	0	0	0	0	0	0	0	0	0	0	0	0	0	0	0	0	0	0	0	0	0	0	0	0	0	0	0	0	0	0	0
ENSG00000219681.2	0	0	0	0	0	0	0	0	0	0	0	0	0	0	0	0	0	0	0	0	0	0	0	0	0	0	0	0	0	0	0.060024	0	0	0	0	0	0	0	0	0	0	0	0	0	0	0	0	0	0
ENSG00000225264.3	0.278013	0.283546	0.366246	0.0458126	0.370234	0.380847	0.336344	0.310936	0.593872	0.276341	0.104564	0.167255	0.0948407	0.234761	0.151723	0.315525	0.403882	0.381429	0.125793	0.175727	0.400692	0.459159	0.21647	0.134856	0.297956	0.322809	0.333593	0.350445	0.109238	0.34666	0.232652	0.188245	0.432248	0.169433	0.318079	0.114022	0.1071	0.361982	0.348487	0.431674	0.143133	0.392814	0.188035	0.162467	0.971076	0.327522	0.337958	0.303521	0.16767
ENSG00000271181.1	0	0.715664	0	0	0.0834344	0.0624189	0	0.240244	0.465504	0.0766463	0	0.120614	0	0	0	0	0.291255	0.0597963	0.272142	0.090517	0.192636	0.348544	0.0975655	0.138929	0.0671461	0.155193	0.070755	0.114872	0.0656466	0.09615	0	0.135751	0.164058	0.0872745	0	0	0	0.174026	0.104711	0	0.172032	0.944245	0.113	0	0	0	0.609286	0.252554	0.0604565
ENSG00000254834.3	0	0	0	0	0.0216507	0	0	0	0	0	0	0	0	0	0	0	0	0	0	0	0	0	0	0	0	0	0	0	0	0	0	0	0	0	0	0	0	0	0	0	0	0	0	0	0	0	0	0	0
ENSG00000226747.5	0.00985443	0.0854296	0.0191907	0.0552116	0	0.0104314	0.0289535	0.0133831	0.15559	0.0128091	0	0.040314	0	0.0530485	0.0783649	0.0237662	0.0243372	0.00999313	0.0454802	0.0756358	0.0321933	0.116497	0	0.0116089	0.0112214	0.0778075	0.0354736	0.0191974	0.0438833	0.0160685	0.0467307	0.0226866	0	0.145853	0.0638895	0.0171769	0.0161341	0.101791	0.052498	0	0	0.236703	0	0	0.234061	0	0.0254559	0.787859	0.505173
ENSG00000207349.1	0	0	0	0	0	0	0	0	0	0	0	0	0	0	0	0	0	0	0	0	0	0	0	0	0	0	0	0	0	0	0	0	0	0	0	0	0	0	0	0	0	0	0	0	0	0	0	0	0
ENSG00000120885.18	20.6404	36.6157	59.1362	16.3685	144.158	34.2216	26.8112	81.5721	14.0789	48.4655	12.5019	27.7965	22.01	53.8641	37.8118	36.2978	22.6501	18.4919	31.6386	49.3641	22.4408	32.7947	58.0075	19.1184	16.6977	89.8118	28.7105	18.0396	22.7908	79.5425	34.1477	118.577	10.8856	25.938	135.144	22.8996	72.9248	77.1894	30.583	9.47206	6.85074	5.8194	4.40329	10.2157	5.53312	2.60536	7.5214	49.1536	1.15319
ENSG00000270577.1	0	0	0	0.156895	0.0792466	0.118572	0	0.0760617	0.0884278	0	0.0716202	0.0572801	0	0	0	0	0	0	0	0.0859737	0.182967	0.0827624	0	0.131955	0	0	0	0.109106	0	0	0.0885297	0	0	0.082894	0	0	0	0	0	0	0	0.224213	0	0	0	0	0.072338	0.0799592	0
ENSG00000197646.7	1.27577	0.776315	1.17653	0.56701	0.720323	0.435005	1.56782	0.733023	0.832829	1.56261	1.89026	0.451653	0.84183	0.979532	0.853565	0.532523	0.977027	0.957854	1.62296	0.555503	0.671253	1.43205	3.57226	0.469655	0.761292	0.661851	0.949403	0.71692	0.819403	0.600074	1.8324	1.22847	0.784981	0.490214	2.79353	1.04772	0.692902	1.0861	1.82981	0.86347	1.19891	0.466533	1.99816	1.27961	1.6025	2.96858	0.166362	2.57445	0.113193
ENSG00000254030.1	0.297045	0.257514	0.530266	0.97082	0	0	1.67278	0.0672355	0.0781666	0.128703	0.633093	0.202533	0.191408	0	0.262465	0.358196	1.58948	0.351431	0.228488	0.0759972	0.0808677	0.731586	0.16383	0.116643	0.0563752	0.325747	0.356431	0.33756	0.220465	0.0807266	2.03467	0.341925	0.206612	0.14655	0	0.517768	0.0810562	1.53416	0	0	0	0	0.0948733	0	0	0	0	0.0706807	0
ENSG00000253803.1	0	0	0	0	0	0	0	0	0	0	0	0	0	0	0	0	0	0	0	0	0	0	0	0	0	0	0	0	0	0	0	0	0	0	0	0	0	0	0	0	0	0	0	0	0	0	0	0	0
ENSG00000249771.1	0	0	0	0	0	0.0186122	0	0	0	0	0	0	0	0	0	0	0	0	0.0270493	0	0	0	0.0581845	0	0.0200217	0	0.0210978	0.0342528	0	0	0	0.0404784	0	0	0.0284986	0	0.0287872	0	0	0	0	0	0	0	0	0	0	0	0
ENSG00000171804.8	0.00473064	0.00546809	0.00460627	0	0	0.00166921	0.00463307	0	0.00248971	0.00204968	0	0	0.00304829	0	0.00208996	0.0019015	0	0.00159908	0.00242588	0	0	0.00233019	0.0026091	0.00185762	0.00359125	0.00207509	0.0056764	0.00153596	0	0.00257125	0.00498515	0	0	0	0.00766758	0	0.0129087	0.00698072	0.0028002	0	0	0	0.00302184	0	0	0	0.00407339	0	0
ENSG00000258007.1	0	0	0	0	0	0	0	0	0	0	0	0	0	0	0	0	0	0	0	0	0	0	0	0	0	0	0	0	0	0	0	0	0	0	0	0	0	0	0	0	0	0	0	0	0	0	0	0	0
ENSG00000204872.3	3.50792	1.08492	1.86479	3.39959	0.295129	91.8292	4.28982	4.60954	3.2034	1.99641	3.56444	5.7209	5.35166	2.9942	5.60431	2.08073	3.16097	5.01867	3.35464	1.22251	2.81853	3.78273	0.658854	3.48466	2.87175	2.81965	7.00779	3.87863	6.90293	1.02032	3.20709	2.44458	5.67126	3.45196	1.04495	6.9408	3.47705	2.04259	2.25602	1.00103	0.05532	0.607279	0.327034	0.376754	0.337782	0.443046	3.11035	0.0812135	0.311054
ENSG00000260689.2	0.108715	0.0807831	0.0604898	0.0870144	0	0.0493203	0.0912625	0.0421841	0.0735636	0.0807494	0.0198604	0.0317678	0	0.0278684	0.0617522	0.0561838	0.0767116	0.0472481	0.0477851	0.119203	0.202949	0.0459003	0.0256971	0.109774	0.0530555	0.0613129	0.0372714	0.0605109	0.0518707	0.0506486	0.0736483	0	0	0.06896	0.0503455	0	0	0.0458356	0.0551585	0.136651	0.0906205	0	0.0892865	0	0.184442	0.0518401	0.0200595	0.0665186	0.0955393
ENSG00000230335.1	0	0	0	0	0	0	0	0	0	0	0	0	0	0	0	0	0	0	0	0	0	0	0	0	0	0	0	0	0	0	0	0	0	0	0	0	0	0	0	0	0	0.0720485	0	0	0	0	0	0	0
ENSG00000231865.1	0.017604	0.071219	0	0.0164384	0.0249088	0.00621159	0.0258614	0.0239078	0.0185298	0.00762742	0.00750389	0.0120029	0	0	0	0.00707601	0.00724602	0.029753	0	0.0990853	0.0766804	0	0.0194184	0.0207381	0.00668202	0.0540539	0.0140823	0.00571573	0.00653279	0.0765466	0.0185511	0	0.00816308	0.0173702	0.0190221	0	0.0288222	0.0173181	0.0104203	0	0	0.0469831	0.0112451	0	0	0	0.0303164	0	0.0060163
ENSG00000258175.1	0.0218131	0.0378203	0	0	0	0	0	0	0.0344403	0.0283534	0	0	0.295171	0	0	0.0263036	0.0269356	0	0	0	0	0.0322338	0.57747	0.0513932	0	0	0	0.0212471	0	0	0.03448	0	0	0	0.106066	0	0	0.0643766	0.154941	0.191927	0	0	0.0418013	0.433409	0	0	0.112695	0.840835	0.0223643
ENSG00000146701.10	86.0463	101.686	82.7755	70.1109	56.6985	85.7074	85.7191	82.5116	72.5014	92.1673	93.6193	67.4914	82.8299	85.894	85.1816	94.9203	91.8042	95.5477	98.7502	78.4702	71.4927	86.4424	85.0355	92.6594	96.6805	84.7539	90.0642	91.9937	97.4932	60.3438	95.1426	84.7112	98.2133	83.3249	66.608	101.526	72.7095	83.1517	78.034	122.514	170.279	73.7172	82.2255	90.0034	152.291	129.777	160.711	89.2878	118.317
ENSG00000253301.4	0	0	0.00334859	0.00963389	0	0	0	0	0	0	0	0	0	0	0.00455797	0.00829393	0	0.00348741	0	0	0	0	0.00569016	0.00405126	0	0.00452555	0	0	0.00765721	0	0.00543603	0	0	0	0	0	0	0	0	0	0	0.0275349	0	0	0.0102103	0	0.182114	0	0
ENSG00000082293.11	0.0392	0.135933	0.160976	0.0811664	0.0144694	0.0324745	0.0525797	0.168969	0.0538193	0.0398766	0.0326923	0.0784397	0.0527153	0.0550493	0.0632493	0.0267177	0.0736607	0.086417	0.0471956	0.217151	0.111358	0.115854	0.0846003	0.0522023	0.0271709	0.109899	0.11248	0.0398429	0.030359	0.0250119	0.0646575	0.0196186	0.0331933	0.151354	0.0856364	0.0386202	0.0558089	0.16096	0.0635576	0	0.00994473	0	0	0.016932	0.0151806	0	0	0.00486651	0.00174742
ENSG00000215244.2	0.0423044	0.0407493	0.0320384	0.0395033	0.0532077	0.0746357	0.0207159	0.057453	0.0445291	0.0305492	0.0120218	0.00961475	0.045433	0.0674767	0.0436094	0	0.0464347	0.0381332	0.028925	0.0360777	0.0383899	0.0625143	0.0544419	0.0221494	0.0642305	0.0494848	0.0282011	0.0320496	0.0680291	0.0689813	0.0520105	0.0216427	0.0326946	0.11827	0.129518	0.032773	0.0538711	0.0762985	0.0918176	0	0.0548539	0.188176	0.144124	0.233487	0.0558227	0.125518	0.242846	0.167769	0.086747
ENSG00000233909.1	0	0	0	0	0	0	0	0	0	0	0	0	0	0	0	0	0	0	0	0	0	0	0	0	0	0	0	0	0	0	0	0	0	0	0	0	0	0	0	0	0	0	0	0	0	0	0	0	0
ENSG00000058799.12	18.6442	14.3752	16.3707	16.4697	7.38895	12.1138	11.3789	16.7379	18.1236	19.8818	18.6927	19.0467	24.5952	14.3882	15.5843	16.278	16.4792	17.7369	22.7028	14.9593	14.6162	15.7125	24.7414	16.8082	16.4861	12.5664	15.7868	16.5806	17.7756	11.4446	17.3157	14.9834	19.9555	16.0996	16.7242	21.0682	14.7075	18.3208	20.8555	5.9664	16.52	18.8626	10.3689	15.8346	16.708	13.2072	11.4941	15.4996	21.7673
ENSG00000254916.1	0	0	0	0	0	0	0	0	0	0	0	0	0	0	0	0	0	0	0	0	0	0	0	0	0	0	0	0	0	0	0	0	0	0	0	0	0	0	0	0	0	0	0.0190527	0	0	0	0	0	0
ENSG00000152785.6	10.3417	3.50458	15.3979	14.7122	14.046	10.6955	6.53342	6.45901	9.32249	2.71612	12.7978	17.1719	8.89065	6.87725	16.2985	22.2386	14.7415	16.539	7.27379	5.1571	20.8678	10.3439	4.76757	12.7342	13.1994	6.52826	18.4864	13.3063	12.9525	10.3827	2.31531	13.8902	16.4206	10.9257	8.02026	2.66777	16.203	4.68496	7.43031	0.089035	0.073805	0.0506375	0.101806	1.25661	0.833705	0	0.00326745	0	0.132279
ENSG00000253865.1	0.0740088	0.0427729	0.0720631	0	0.0349062	0	0.144965	0.0335034	0.0389503	0.0641326	0.031547	0.100922	0.0476892	0.132802	0	0	0.0913886	0.0250168	0.0379518	0.113608	0	0.109365	0	0.0290616	0	0.0973917	0.0296016	0	0.0274644	0.040226	0	0.0567937	0.0343183	0.109538	0.0399853	0.0430006	0.0403902	0.10921	0.0876157	0	0	0.0987603	0.236377	0	0.0732436	0.0823446	0.0318632	0.176101	0.050586
ENSG00000263944.2	0	0.178372	0	0	0	0	0	0	0	0	0	0	0	0	0	0	0	0	0	0	0	0	0	0	0	0	0	0	0	0	0	0	0	0	0	0	0	0	0	0	0	0	0	0	0	0	0	0	0
ENSG00000235483.1	0	0	0	0	0	0	0	0	0	0	0	0	0	0	0	0	0	0	0	0.0864745	0	0	0	0	0	0	0	0	0.0313574	0	0	0	0	0	0	0	0	0	0	0	0	0	0	0	0	0	0	0	0
ENSG00000135269.16	26.9406	34.6701	24.5592	29.8027	111.539	30.5486	24.327	20.1511	25.0165	31.2253	25.8178	25.4353	23.8416	36.7874	26.5968	33.9784	28.6302	26.4228	43.9639	52.0365	30.0164	21.3403	59.9691	24.8298	25.4137	24.3649	28.2843	23.8613	25.5102	61.9949	22.897	83.6506	21.9472	31.2913	38.0686	39.4388	52.16	28.5569	26.421	13.4789	32.6297	22.7943	29.8502	28.1483	38.7504	15.0686	22.1587	27.9239	34.2966
ENSG00000264554.2	0	0	0	0	0	0	0	0	0	0	0	0	0	0	0	0	0	0	0	0	0	0	0	0	0	0	0	0	0	0	0	0	0	0	0	0	0	0	0	0	0	0	0	0	0	0	0	0	0
ENSG00000249700.7	0.0563548	0.0586258	0.0356676	0.047361	0.115622	0.0566717	0.0372549	0.137762	0.133466	0.0586014	0.0468425	0.115272	0.0490231	0.0657301	0.0522839	0.0577627	0.0730683	0.0257166	0.0563526	0.0692065	0.0782444	0.0749492	0.111893	0.0697072	0.0288775	0.0630359	0.0608592	0.0411693	0.122341	0.0689187	0.053448	0.0583823	0.0352782	0.0250228	0.0822075	0.0785838	0.101493	0.0706854	0.0550406	0.0495849	0.0493238	0.34969	0.0863959	0.167958	0.0501949	0.0940533	0.0327545	0.0724106	0.265783
ENSG00000250980.1	0.0565893	0	0	0.0528423	0	0	0	0.0256177	0	0.0980754	0	0	0	0	0	0	0	0.0191286	0.029019	0	0	0.0557489	0.0312108	0.0222214	0.0214798	0	0.0226342	0.0183736	0	0.061516	0	0	0	0	0	0	0.0308836	0	0	0	0	0	0.0361481	0.187397	0.112008	0.0629631	0	0.0269304	0.0193398
ENSG00000272472.1	0.020962	0.23624	0.0102055	0.0293611	0	0	0	0.0284682	0.0165483	0.0408706	0.0402087	0.0535967	0	0.0940359	0.0138913	0	0.0258846	0.0318856	0.016124	0.032178	0.136961	0	0	0.037041	0	0.206887	0.0251528	0.020418	0.0350052	0.0512707	0.049702	0	0.0583212	0	0	0.018269	0.0686401	0.0309324	0	0	0	0	0	0	0	0	0.0270745	0.0149635	0.0429835
ENSG00000252035.1	0	0	0	0	0	0	0	0	0	0	0	0	0	0	0	0	0	0	0	0	0	0	0	0	0	0	0	0	0	0	0	0	0	0	0	0	0	0	0	0	0	0	0	0	0	0	0	0	0
ENSG00000154814.12	3.48423	4.03976	3.1748	3.68689	0.969838	4.81435	3.64312	3.216	3.61485	3.82977	3.80427	2.69206	3.44132	2.78868	3.17324	2.83544	3.14749	3.57189	3.28785	2.77655	2.77955	3.57668	3.31566	4.10174	3.59899	2.89385	3.58966	3.39845	4.14391	2.23917	3.61149	2.21901	3.39685	3.26886	2.14862	6.04003	2.4821	3.33282	2.93724	2.95259	2.96482	1.87695	3.16973	2.22251	2.24699	2.33553	2.36692	1.89596	4.13594
ENSG00000204669.8	0.00928069	0	0	0	0	0.0392963	0	0	0.0146531	0	0.011868	0.00949172	0	0	0	0	0	0	0	0	0	0	0	0	0	0	0	0	0	0	0.01467	0	0	0	0	0	0	0.0273899	0	0	0.027076	0	0	0	0.0275542	0	0.0239738	0.0397494	0.0475761
ENSG00000199313.1	0.207225	0.179646	0.100888	0	0	0.109679	0	0.140714	0.654366	0.134678	0.132497	0	0	0	0.137325	0	0.255888	0.105071	0	0.159051	0.169245	0.15311	0	0.244118	0	0.272697	0.497306	0	0	0.168949	0.16378	0	0	0	0.335876	0	0	0.305789	0.551979	0	0	0.414793	0.198556	0	0	0	0.802952	0	0.106231
ENSG00000200638.1	0	0	0	0	0	0	0	0	0	0	0	0	0	0	0	0	0	0	0	0	0	0	0	0	0	0	0	0	0	0	0	0	0	0	0	0	0	0	0	0	0	0	0	0	0	0	0	0	0
ENSG00000237005.1	0.0518061	0	0	0	0	0	0.0761064	0	0.163591	0	0	0.0529841	0	0	0	0.124942	0	0.0525353	0	0	0	0	0.0857183	0.0610294	0	0	0	0	0.0576752	0	0	0	0	0	0	0	0.0848195	0	0	0	0	0	0	0	0	0	0	0	0
ENSG00000263766.4	0.198548	0.243	0.227446	0.16359	0.165257	0.185447	0.223049	0.142754	0.221283	0.13663	0.104547	0.191118	0.338662	0.272447	0.201233	0.197171	0.302863	0.272405	0.14374	0.286856	0.190775	0.207106	0.309193	0.178862	0.106396	0.230541	0.2943	0.147891	0.182035	0.266619	0.36923	0.188215	0.324946	0.27658	0.208233	0.285009	0.267707	0.206814	0.248879	0	0.511109	0.607829	0.201434	0.116029	0.208054	0.116953	0.3017	0.266788	0.263438
ENSG00000138834.11	3.04641	3.14962	2.9828	3.33857	2.48055	3.1367	3.72947	4.66402	7.07459	2.57388	1.86308	2.58054	2.85184	3.32292	2.8843	2.76537	3.67648	3.27379	2.65792	3.82558	4.13065	5.21662	1.70353	2.94579	2.2661	5.80365	3.64869	2.09501	3.35386	3.10006	4.72406	2.24363	3.19217	5.93256	4.05991	1.63727	2.28604	4.63693	4.00223	11.3423	4.43977	12.7378	5.90012	5.26833	3.10285	2.8764	8.70743	3.98886	6.3538
ENSG00000249207.1	0.0460012	0.106345	0.0298612	0.0859107	0.347144	0.0649262	0	0.0208245	0.0484203	0.0597938	0	0	0	0.0825448	0	0.0369807	0	0.108847	0.0471789	0.0470765	0.0500935	0.022659	0.0761135	0	0.0698433	0.201784	0.0183993	0.0298716	0	0.125015	0.024238	0.317709	0.021331	0.0680852	0.149121	0	0.100421	0.181017	0.0272294	0	0	0.184158	0.0587693	0.152334	0.0910512	0	0.019805	0.0656748	0.0471637
ENSG00000254183.1	0	0	0	0	0	0	0	0	0	0.0251065	0	0	0	0	0	0	0	0	0	0	0	0	0	0	0	0	0	0	0	0	0.0305315	0	0	0	0	0	0	0	0	0	0	0	0	0	0.0573465	0.257889	0	0	0
ENSG00000223978.1	0	0	0	0	0	0	0	0	0	0	0	0	0	0	0	0	0	0	0	0	0	0	0	0	0	0	0	0	0	0	0	0	0	0	0	0	0	0	0	0	0	0	0	0	0	0	0	0	0
ENSG00000126217.19	1.4532	1.64389	1.57731	0.918114	0.610036	1.12171	1.6497	1.75145	3.25119	2.24243	1.0089	2.71165	2.19019	1.3235	1.17107	1.60048	1.94768	1.78758	1.64369	1.73247	1.29383	2.39468	1.03271	2.3527	1.33083	1.36643	1.95653	1.7567	1.1846	1.10969	1.88699	1.04737	1.29716	3.11358	1.60683	0.805018	1.23015	3.5176	3.78684	1.13031	0.965304	3.33154	1.55393	1.56261	2.55821	0.769745	1.47469	3.13397	1.73536
ENSG00000133063.14	0.118223	0.0488043	0.0127905	0.0315413	0.0159313	0.00595927	0.151622	0.211526	0.0266656	6.58095	0.00959877	0.134345	0.116083	0.114488	0.00994853	0.0203657	0.0648824	0.0380592	0.0490771	0.538676	0.524155	0.0776446	0.0341542	0.0287383	0.170949	0.466724	0.0315239	0.126122	0.0793874	0.027539	0.302558	0.0172806	0.0026105	0.111097	0.0517067	0.0425222	0.159764	0.526131	5.33841	1.35392	0.613172	0.338059	3.35516	3.13198	2.13943	1.52209	0.0290849	2.81306	0.0885026
ENSG00000249557.2	0	0	0	0	0	0	0	0	0	0	0	0	0	0	0	0	0	0	0	0	0	0	0	0	0	0	0	0	0	0	0	0	0.017985	0	0	0	0	0	0	0	0	0	0	0	0	0.0431539	0	0	0
ENSG00000243422.1	0.557912	0.752365	0.150901	0.868285	1.22798	0.656198	0.136601	1.13654	0.929815	0.322308	0.19818	0.1585	0.0599172	0.556178	0.698363	0.747517	0.421013	1.32012	1.52586	0.428215	0.759431	0.687034	0.974404	0.584213	0.6706	0.448668	0.483492	0.573625	0.310559	0.454864	0.097988	0.998987	0.258707	0.963377	1.50714	1.08053	0.608961	0.228688	0.440325	0.272717	0.452134	0.744501	0.237589	0.307924	0	0	0.0400332	0.92927	0.889795
ENSG00000260792.1	0.0228077	0	0	0.0319463	0.00537863	0.00402386	0.0279216	0.0103249	0.0300089	0	0.00972203	0.00777545	0.00734833	0.0272842	0.00503814	0.00458383	0.0516336	0.0269836	0.00584791	0.0291761	0.0124184	0.022469	0.0062896	0.00895609	0.0173144	0.0100046	0.00456125	0.0185132	0.0169277	0.0309918	0.0120174	0	0.0211521	0.0337571	0.00616125	0	0	0.0392653	0.00675026	0	0	0	0.0291382	0	0.0564298	0.0126883	0.0589168	0.032562	0.0623576
ENSG00000117152.12	0.326949	0.234031	0.12851	0.546179	3.91738	0.996998	0.141008	0.187386	0.194172	0.744686	0.103565	0.131912	0.173953	1.41018	0.262383	0.387021	0.192604	0.146004	0.927511	0.492677	0.240078	0.141839	1.56831	0.318019	0.116131	0.528928	0.194357	0.122711	0.293862	1.09559	0.0711203	2.17521	0.125181	0.253053	1.81829	0.402583	1.50276	0.349671	0.926813	0.052784	0.236277	0.792533	0.707018	0.238393	1.02414	0.390473	0.189835	0.706588	0.473601
ENSG00000121310.15	3.68409	3.823	4.01444	5.29192	3.96592	5.50802	3.9408	4.65772	7.81965	2.19964	2.73468	4.07939	4.90455	4.93501	3.87767	4.35635	4.77214	4.80372	4.66098	5.07996	4.55989	5.55336	3.3828	3.67548	3.53283	6.20071	5.03581	3.87054	3.96609	3.97349	4.6861	3.32158	4.89831	7.64384	5.78031	3.49593	3.86247	5.41604	6.53992	2.11764	2.13939	10.3576	3.12282	1.23287	2.93268	3.14646	5.72493	3.24994	7.56209
ENSG00000100601.8	3.2745	2.98021	3.25297	3.37202	2.54035	3.52561	3.1695	3.16558	3.64802	3.47399	3.09813	3.13508	4.30873	3.38635	3.15694	2.38023	3.62148	3.83264	4.37054	3.44499	2.50772	3.83637	4.42215	3.11842	4.00171	3.54391	3.53133	3.15971	3.3218	2.5782	3.78122	4.10976	3.55476	2.98943	3.80282	4.46299	2.62213	3.35679	4.94529	2.55802	4.97005	4.41046	3.93901	3.04026	4.5581	3.74546	1.83798	4.73317	3.04348
ENSG00000201143.1	0	0	0	0	0	0	0	0	0	0	0	0	0	0	0	0	0	0	0	0	0	0	0	0	0	0	0	0	0	0	0	0	0	0	0	0	0	0	0	0	0	0	0	0	0	0	0	0	0
ENSG00000253960.1	0	0	0.0530991	0	0	0	0	0.0370301	0	0	0	0	0	0	0	0	0	0.0553004	0	0	0	0	0	0	0	0.107643	0	0	0.0303554	0	0.0861999	0	0	0	0	0	0	0	0	0	0	0	0	0	0	0	0	0	0.0838663
ENSG00000252621.1	0	0	0	0	0	0	0	0	0	0	0	0	0	0	0	0	0	0	0	0	0	0	0	0	0	0	0	0	0	0	0	0	0	0	0	0	0	0	0	0	0	0	0	0	0	0	0	0	0
ENSG00000185823.3	0.0192741	0	0.0112605	0.00539938	0.0218176	0.00816106	0.00849447	0.00523518	0.0121726	0.00250531	0.00985896	0.0197124	0	0.00345856	0.00255455	0.00464839	0	0.00195454	0.00296514	0.0207109	0.0188899	0.00854456	0.00318909	0.00227056	0.00658435	0.0101455	0.00231275	0.0018774	0.00429154	0.0125713	0.00304666	0.00887449	0.0214501	0.00285272	0	0	0.0189339	0	0	0	0.00562314	0	0	0	0.00572246	0	0	0	0
ENSG00000241180.1	0	0	0	0	0	0	0	0	0	0	0	0	0	0	0	0	0	0	0	0	0	0	0	0	0	0	0	0	0	0	0	0	0	0	0	0	0	0	0	0	0	0	0	0	0	0.109297	0	0	0
ENSG00000115268.8	114.003	131.861	158.098	69.0066	85.5187	108.297	126.941	109.664	114.01	116.015	101.819	78.6902	181.461	111.839	106.78	146.197	151.143	136.712	191.62	87.5474	71.0384	146.217	158.046	122.984	120.495	141.33	124.968	129.941	105.902	89.3763	133.09	113.529	186.239	110.573	113.761	153.244	85.6959	131.396	177.083	462.926	291.01	225.844	163.353	194.415	384.119	333.425	213.885	168.622	194.954
ENSG00000247402.2	0	0	0	0	0	0	0	0	0	0	0	0	0	0	0	0	0	0	0	0	0	0	0	0	0	0	0	0	0	0	0	0	0	0	0	0	0	0	0	0	0	0	0	0	0	0	0.047917	0	0
ENSG00000232995.6	0.0680081	0.166468	0.175289	0.179308	0.0905675	0.131276	0.13517	0.179288	0.252651	0.0831991	0.102315	0.122743	0.154668	0.143569	0.111345	0.0964804	0.133378	0.154158	0.178476	0.12896	0.150294	0.100497	0.205194	0.150806	0.150329	0.257956	0.206411	0.101313	0.115796	0.143509	0.1075	0.147357	0.105737	0.153946	0.226944	0.16038	0.176844	0.318776	0.291263	0	0.140054	0.368349	0.191657	0.317944	0.190037	0.0934722	0.62004	0.262723	0.410157
ENSG00000278572.1	0.0161354	0	0	0	0.0228308	0	0	0	0.0254759	0	0	0	0	0	0	0	0	0	0	0	0	0	0	0	0	0	0	0	0.0179634	0	0.0510104	0.0371465	0	0.0238816	0	0	0	0	0	0	0	0	0	0.160298	0	0	0.0416809	0	0
ENSG00000250416.2	0	0	0	0	0	0	0	0	0	0	0	0	0	0	0	0	0	0	0	0	0	0	0	0	0	0	0	0	0	0	0	0	0	0	0	0	0	0	0	0	0	0	0	0	0	0	0	0	0
ENSG00000110852.4	1.88057	2.46929	2.59143	2.26439	1.6728	1.50174	3.35238	2.56145	2.17047	3.98113	2.60173	1.57466	3.47592	2.54568	2.00418	1.69084	1.60924	1.95723	3.87436	1.6291	1.41016	2.26706	7.40595	1.50931	2.01622	1.57023	2.13118	2.37274	1.87324	1.9636	3.60713	3.67114	1.52988	1.5626	4.49193	3.60383	3.95224	2.70202	4.27689	1.59661	1.34756	1.05664	2.68706	2.18511	1.50197	1.94555	0.71732	2.51214	0.558134
ENSG00000119411.10	10.6359	12.0215	16.1232	13.3426	2.06214	4.84481	18.1211	18.4114	18.849	13.3009	20.9764	10.2752	21.1598	9.26989	16.7104	14.2538	14.0372	13.9112	19.6633	17.1835	8.3877	18.567	29.5935	15.9047	14.2087	16.1753	20.427	19.5599	13.0214	7.87756	18.3904	10.5795	16.4608	17.8347	11.3285	18.6471	11.4534	17.342	20.6601	25.4827	14.583	20.2094	37.6858	23.5354	19.9962	26.8072	30.0217	18.3631	22.5977
ENSG00000243531.1	0.0725286	0.251505	0	0	0	0	0.213098	0.197	11.3369	0.659925	0	0.519244	5.04742	0.130146	0	2.09903	0.0895608	0	2.78945	7.34817	0.710827	0	0.840039	3.07588	0	0.0954438	0	0	0	2.0105	0.114646	0	0.100896	2.469	0	0	0.356242	4.28104	0.386385	0	1.26959	0	0	0	0	0	0.374711	0	0
ENSG00000271757.1	0.0612918	0.0354232	0.0795739	0.114467	0	0.0432536	0.120055	0.110986	0	0	0.0522525	0.0208951	0	0.183304	0.0270782	0.0246365	0	0	0.0942914	0.0940867	0.0333722	0.0301908	0	0	0.0930588	0	0.0490302	0	0.0227452	0	0	0.0470348	0.0568426	0.0604776	0.0993437	0	0.0334499	0.0301482	0.0362803	0	0.178816	0.0817902	0.117456	0	0.121316	0	0.0791643	0	0.293256
ENSG00000248387.1	0	0	0	0	0	0	0.0326837	0	0	0	0	0	0	0	0	0	0	0	0	0	0	0	0	0	0	0	0	0	0	0	0	0	0	0	0	0	0	0	0	0	0	0	0	0	0	0	0	0	0
ENSG00000250885.1	0	0	0	0	0	0	0	0	0	0	0	0	0	0	0	0	0	0	0	0	0	0	0	0	0	0	0	0	0	0	0	0	0	0	0	0	0	0	0	0	0	0	0	0	0	0	0	0	0
ENSG00000258749.1	0	0	0	0	0	0	0	0	0	0	0	0	0	0	0	0	0	0	0	0	0	0	0	0	0	0	0	0	0	0	0	0	0	0	0	0	0	0	0	0	0	0	0	0	0	0	0	0	0
ENSG00000263669.2	0	0	0	0	0	0	0	0	0	0	0	0	0	0	0	0	0	0	0	0	0	0	0	0	0	0	0	0	0	0	0	0	0	0	0	0	0	0	0	0	0	0	0	0	0	0	0	0	0
ENSG00000236430.1	0.0211608	0	0.0103022	0	0.0299415	0.0111999	0	0	0.0334104	0.0687636	0.01353	0.0324629	0	0.037971	0.014023	0.0382755	0	0.0107293	0	0.0162416	0.0172825	0	0.0175063	0.0249281	0.0240962	0.0139232	0.0380869	0	0	0	0.0167244	0	0	0.0313195	0	0	0.0173227	0.0156128	0	0	0	0	0	0	0	0	0.0136656	0.0151054	0
ENSG00000254791.1	0.0788354	0.136687	0	0	0	0.0417257	0	0.0535326	0.124472	0.0512364	0	0	0	0	0	0	0	0.0399725	0	0	0.0643865	0	0	0	0	0.207487	0.0945963	0.0383948	0.0877667	0.0642742	0.0623076	0	0	0.116682	0	0	0	0.0581663	0	0	0.114999	0.315604	0	0	0	0	0.0509118	0.168827	0
ENSG00000249852.1	0.0289535	0.0502006	0.0140962	0.101387	0.0307258	0.038311	0.0106336	0.0688123	0.0457142	0.103495	0.0092563	0.0148059	0	0.0259772	0	0.017457	0.00893821	0.0220208	0.0222711	0.0777796	0	0.0106963	0.0479064	0	0.0247275	0.0476267	0.017371	0.00705054	0.0161168	0.0708171	0.0114417	0.0499921	0	0.0214267	0.0351966	0.0252339	0.0355531	0.0106812	0.0385614	0.0636884	0.063353	0.0579552	0.0970984	0	0.0429813	0.024161	0.00934908	0.0516703	0
ENSG00000141040.13	0.577625	0.324431	0.526792	0.376046	1.47922	0.314335	0.639414	0.812086	0.462423	0.581618	0.421346	0.370265	0.503264	0.817516	0.576874	0.67201	0.517373	0.730132	1.05133	0.58072	0.485048	0.769416	1.46726	0.637334	0.611432	0.883243	0.737034	0.574522	0.543435	0.975036	0.688004	1.40471	0.5489	0.379299	1.27249	0.794124	0.765897	0.924398	1.00407	0.0357913	0.593379	0.390832	0.491101	0.0808235	0.350238	0.122201	0.0420315	0.284566	0.538005
ENSG00000253286.4	0	0	0.0150259	0	0	0	0	0.0209574	0.0243647	0	0.0197336	0.0157825	0.0298311	0	0	0	0	0	0	0	0.0504133	0	0	0	0	0	0.0185167	0	0.103079	0	0	0	0	0.0228399	0	0	0	0	0	0	0	0	0	0	0	0.0515092	0	0.0220313	0.0158216
ENSG00000253292.1	0	0	0	0	0	0	0	0	0.0274285	0.0225808	0.0222151	0.0177671	0	0	0	0	0.0214517	0.0176166	0	0	0	0.0256712	0.0287438	0	0	0	0	0	0	0.0283268	0	0	0	0	0	0	0	0	0	0	0	0	0.0332909	0	0	0	0	0	0
ENSG00000275230.1	0	0.0885581	0	0	0	0	0	0	0	0	0	0	0	0	0	0	0	0	0	0	0	0	0	0	0	0	0	0	0	0	0	0	0	0	0	0	0	0	0	0	0	0	0	0	0	0	0	0	0
ENSG00000251270.1	0	0	0	0	0	0	0	0	0	0	0	0	0	0	0	0	0	0	0	0	0	0	0	0	0	0	0	0	0	0	0	0	0	0	0	0	0	0	0	0	0	0	0	0	0	0	0	0	0
ENSG00000240052.1	0	0	0.161606	0	0.0939353	0	0	0	0.0524092	0.215732	0.0424477	0.0339486	0	0	0.0439944	0	0.0409889	0.0673222	0	0	0	0.147154	0.0549225	0	0.151194	0	0	0.0646649	0.0369544	0.0541256	0.0524695	0	0.092353	0	0	0	0	0.0489822	0	0.292063	0.387366	0.265771	0.127221	0	0.098552	2.99154	0.0857462	0	0.0340327
ENSG00000233545.1	0	0	0	0	0	0.0469573	0	0	0.0700392	0	0	0.136106	0	0	0	0	0	0.0449844	0	0.0680953	0	0	0.0733979	0.0522576	0	0	0	0	0	0	0	0	0	0	0	0	0	0	0	0	0	0	0	0	0	0	0	0	0
ENSG00000278733.1	0.102514	0	0.0998189	0.143589	0.507682	0.162774	0.0376498	0.0348056	0.161857	0.0333127	0	0.0524225	0.0495428	0.183951	0.203804	0.123618	0.158235	0.129946	0.118281	0.354072	0.0418626	0.0757437	0.212024	0.0301912	0.0291836	0.0674515	0.215265	0.174744	0.0570638	0.208948	0.0810218	0.236005	0.0356522	0	0.415395	0.0893439	0.293721	0.0378184	0.0910212	0	0	0.410396	0.0491129	0	0	0	0.165508	0.0365891	0.183933
ENSG00000269161.1	0.126137	0.164025	0.153526	0.530031	0.0446193	0.100142	0	0.299782	0.647253	0.0819782	0.0806506	0.387014	0.0609592	0.33951	0.0835893	0	0.194697	0.15989	0.194049	0.435662	0.463583	0.512587	0.0521763	0.22289	0.0359086	0.580962	0.302708	0.0921475	0.175533	0.205677	0.049846	0	0.307074	0.373383	0.153335	0.0549659	0.206517	0.325731	0.167993	0.27746	0.367998	0.757449	0.241721	0.313279	0	0	0.529483	0.0450205	1.06692
ENSG00000244273.1	0.0712812	0	0.138814	0	0	0	0.209433	0.242015	0.337633	0.0926535	0.319035	0.182255	0	0.127907	0.0944744	0.128933	0.0880205	0.180711	0.219318	0	0	0.105334	0.176912	0	0.0405846	0.0469011	0.0427659	0.173579	0	0	0.112674	0.164102	0.347061	0.0527507	0.0577674	0.186371	0	0.0525926	0.37974	0	0	0	0.136599	0.354075	0	0.356894	0	0.203533	0.0730825
ENSG00000274878.1	0	0	0	0	0	0	0	0	0	0	0	0	0	0	0	0	0	0	0	0	0	0	0	0	0	0	0	0	0	0	0	0	0	0	0	0	0	0	0	0	0	0	0	0	0	0	0	0	0
ENSG00000261737.1	0.739626	0.654279	1.11702	1.43768	0.640735	0.479346	1.10873	1.08647	2.24023	1.53037	0.907214	1.96058	1.60486	1.05633	0.980282	1.85658	1.2861	1.31639	1.69515	1.08903	1.60263	0.713772	1.44856	1.10247	1.0313	0.913718	1.43086	1.36735	0.739395	0.762997	1.40772	1.28575	1.44887	1.78727	0.929689	1.60494	1.6805	0.913229	1.2062	0.398434	1.18901	0.181283	0.57852	0.149957	0.851485	0.70537	0.487397	0.107749	0.959502
ENSG00000177576.9	1.43063	1.59004	1.54482	1.23314	0.927788	1.49983	1.60994	1.68759	1.8968	1.50792	1.19911	1.54991	2.37998	1.46046	1.30966	1.37403	1.60805	1.45541	2.56064	1.57669	1.28451	1.83965	1.95742	1.71233	1.49332	1.44516	1.7524	1.40467	1.75095	1.17386	1.30465	1.58344	1.7988	1.77131	1.02191	2.65751	1.38886	1.51227	2.48755	0.726211	1.25749	0.596589	0.698572	0.751632	1.49071	1.01781	0.556707	1.29618	0.719286
ENSG00000202473.1	0	0	0	0	0	0	0	0	0	0	0	0	0	0	0	0	0	0	0	0	0	0	0	0	0	0	0	0	0	0.0714589	0	0	0	0	0	0	0	0	0	0	0	0	0	0	0	0	0	0	0
ENSG00000214652.5	0.138232	0.164774	0.0757113	0.072607	0.464529	0.100599	0.164995	0.0938654	0.163689	0.101069	0.0773361	0.0795235	0.167012	0.0465083	0.240462	0.0937624	0.256041	0.0350444	0.199365	0.0928352	0.19757	0.063834	0.443141	0.223908	0.245949	0.227383	0.0933005	0.176721	0.105801	0.309925	0.0409694	0.596689	0.144223	0.0895097	0.30807	0.135532	0.19803	0.10199	0.414231	0	0.0252054	0.138347	0.0331124	0	0.0256505	0	0.0669525	0.0370032	0.0442891
ENSG00000233270.1	0.623902	0.270435	0.405	0.436943	0.294263	0.495324	0.381896	0.706093	1.06716	1.48677	0.199458	0.212696	0.301519	0.559766	0.413452	0.50156	0.96302	1.05447	0.719859	0.638485	0.509554	0.614637	1.37641	0.489985	0.473633	0.342093	0.623861	0.810282	0.520938	0	0.657468	0.478777	0.506287	0.230855	0.674161	0.724999	0.255371	0.230164	0.184652	2.74477	1.21347	2.70582	1.09597	0.516517	0.617451	0.867717	1.54451	0.519592	1.22603
ENSG00000251201.7	0.0622563	0.0404783	0.0265211	0.0436006	0.0660672	0.0411884	0.0743099	0.079265	0.0614346	0.030346	0.0597091	0.0397949	0.0150436	0.0279283	0.0360994	0.0375363	0.0432429	0.055241	0.0718315	0.0955673	0.0635575	0.0287493	0.096571	0.07334	0.0531693	0.0512038	0.0373513	0.0644308	0.025991	0.038068	0.0246021	0.0985359	0.0324772	0.040313	0.151361	0.0474759	0.0191117	0.0631591	0.0414576	0.034236	0.0340556	0	0.164043	0.0386557	0.0231047	0.077927	0.140718	0.0388858	0.011968
ENSG00000243176.4	0.225477	0.276916	0.320177	0.34214	0.279159	0.427634	0.345042	0.318977	0.385669	0.195388	0.228266	0.211387	0.217937	0.202299	0.42336	0.249237	0.324832	0.33345	0.361328	0.3317	0.322266	0.208246	0.481888	0.22135	0.246057	0.210174	0.450925	0.274533	0.292859	0.229789	0.193057	0.237916	0.261388	0.333723	0.350234	0.311141	0.230727	0.221816	0.367032	0	0.137046	0.263276	0.090019	0.0933344	0.0836798	0.0627184	0.145613	0.174367	0.577939
ENSG00000226444.2	0	0	0	0	0	0	0	0	0	0	0	0	0	0	0	0	0	0	0	0	0	0	0	0	0	0	0	0	0	0	0	0	0	0	0	0	0	0	0	0	0	0	0	0	0	0	0	0	0
ENSG00000183146.4	0	0.601549	0.418261	1.805	0.163638	0	0	1.12187	0.260852	0.408024	0	0	0	0.0889378	0	0.239069	0.897649	1.34031	0.0254164	0	0	0	0	0	0	0	0	0	0	0.296335	0.835688	0	0	0	0	0.892727	0.568039	0.048759	0.0293383	0	0	0	0.0949814	0	0	0	0.853556	0	0
ENSG00000247121.5	0.285996	0.396695	0.36202	0.368542	0.461324	0.399619	0.520981	0.605915	0.514771	0.386616	0.248694	0.315899	0.298546	0.348971	0.386633	0.400051	0.423789	0.330625	0.519173	0.439022	0.252265	0.338099	0.293389	0.478416	0.377776	0.4441	0.418671	0.384433	0.477595	0.410382	0.470157	0.513562	0.310326	0.347102	0.53772	0.329015	0.421422	0.78497	0.487552	0.0503279	0.216939	0.18319	0.383646	0.397775	0.390594	0.38185	0.591027	0.375644	0.134883
ENSG00000176893.4	0	0	0	0	0	0	0	0	0	0	0	0	0	0	0	0	0	0	0	0	0	0	0	0	0	0	0	0	0	0	0	0	0	0	0	0	0	0	0	0	0	0	0.0294157	0	0	0	0.0991299	0	0
ENSG00000264256.1	0	0	0	0	0	0	0	0	0	0	0	0	0	0	0	0	0	0	0	0	0	0	0	0	0	0	0	0	0	0	0	0	0	0	0	0	0	0	0	0	0	0	0	0	0	0	0	0	0
ENSG00000173114.11	0.509104	0.14928	0.331695	0.209733	0.4873	0.217943	0.967877	0.254193	0.254147	0.194632	0.244137	0.218226	0.644044	0.873235	0.302647	0.388207	0.16641	0.580804	0.598923	0.620608	0.275159	0.420412	0.247753	0.582102	0.426269	0.527096	0.229082	0.54694	0.35007	0.323511	0.384619	0.499843	0.593657	0.260405	0.406519	0.339299	0.723209	0.480581	0.392202	0	0.0873699	0.164847	0.0645628	0.0371892	0.122255	0.0124951	0.0580198	0.138954	0.122816
ENSG00000230237.1	0	0	0	0	0	0	0	0	0	0	0	0	0	0	0	0	0	0	0	0	0	0	0	0	0	0	0	0	0	0	0	0	0	0	0	0	0	0	0	0	0	0	0	0	0	0	0.0318632	0	0
ENSG00000228133.2	0.0140764	0	0	0	0	0.156456	0	0	0	0	0	0	0	0	0.00932826	0	0	0.00713726	0	0.0108041	0	0	0	0	0	0	0.00844528	0	0	0	0.0111253	0	0	0	0	0	0.0115233	0	0	0	0	0	0	0	0	0	0.0363621	0	0
ENSG00000099331.12	9.39197	12.3882	10.9198	8.19005	7.36155	5.91327	14.8256	11.0124	13.5856	9.47677	8.96528	8.09185	7.10897	9.63926	8.84359	10.2159	13.3063	10.8979	7.10206	10.5427	10.8039	13.0858	4.90011	10.7772	8.89491	10.6612	10.0344	10.0217	8.54368	9.93384	13.947	6.65007	9.24776	12.5347	11.2972	5.15447	6.94722	13.4138	8.54749	12.6888	6.96822	19.0009	13.491	10.1548	7.9225	10.1432	12.3679	14.9971	10.6668
ENSG00000277528.1	0	0	0	0	0	0	0	0	0	0	0	0	0	0	0	0	0	0	0	0	0	0	0	0	0	0	0	0	0	0	0	0	0	0	0	0	0	0	0	0	0	0	0	0	0	0	0	0	0
ENSG00000234186.2	0	0	0	0	0.00834683	0	0	0	0	0	0	0.00603317	0	0	0	0	0	0	0	0	0	0	0	0	0.00671734	0	0	0.00574595	0	0	0	0	0	0	0	0.0102824	0	0	0	0	0	0	0	0	0.0175141	0	0	0	0
ENSG00000237841.1	0	0	0	0	0	0	0	0	0	0	0	0	0	0	0	0	0	0	0	0	0	0	0	0	0	0	0	0	0	0	0	0	0	0	0	0	0	0	0	0	0	0	0	0	0	0	0	0	0
ENSG00000222629.1	0	0	0	0	0	0	0	0.174336	0	0	0	0	0	0	0	0	0	0	0	0	0	0.189694	0	0	0	0	0	0	0	0	0	0	0	0	0	0	0	0	0	0	0	0	0	0	0	0	0	0	0
ENSG00000272668.1	0.217982	0.0687172	0.443798	0.111027	1.28981	0.587351	0.4949	1.10341	0.281592	0.154549	0.0760231	0.304007	0.881077	0.177795	0.525288	0.501817	0.562814	0.241146	0.0609717	0.912589	0.323692	0.878502	0.229519	0.0933783	0.361048	1.01702	0.42801	0.115814	0.463293	0.775505	0.438536	0.501833	0.137836	0.0879899	1.1563	0.138166	0.713782	0.5556	0.738988	0.871801	0.173442	0.634657	0.265827	0.196869	0.176505	0.0661457	1.51011	0.113166	3.69775
ENSG00000243486.1	0	0	0	0	0	0	0	0	0	0	0	0	0	0	0	0	0	0	0.0317434	0	0	0	0	0	0	0	0	0	0	0	0	0	0	0	0	0	0	0	0	0	0	0	0	0	0	0	0	0	0
ENSG00000112175.7	2.16191	3.4111	2.86991	2.80707	0.244096	2.40117	3.40784	3.42457	5.78365	2.24237	2.90542	2.08343	4.64752	4.77508	1.96536	2.80171	3.92055	4.97278	2.41677	1.32409	3.02174	2.61435	1.47578	1.69931	4.06679	3.02851	4.6333	3.80046	2.31693	0.969578	3.30709	2.63642	1.97094	3.72131	0.380751	3.10936	3.09488	3.44476	3.03737	0.0968864	0.642507	0.176329	0.0140678	0.255253	0.817318	0	0	0.0104805	1.22681
ENSG00000249423.1	0	0	0	0	0	0	0	0	0	0	0	0	0	0	0	0	0	0	0	0	0	0	0	0	0	0	0	0	0	0	0	0	0	0	0	0	0	0	0	0	0	0	0	0	0	0	0	0	0
ENSG00000131828.12	30.842	39.9284	26.8435	32.6859	15.2577	21.0487	29.6383	30.4686	29.2185	29.5351	34.0689	23.4965	22.936	29.4182	27.2315	28.2876	31.9652	34.0066	26.8006	27.9665	25.366	30.7768	21.4263	32.0618	35.8667	32.2465	31.937	30.3844	32.5965	21.784	33.2481	25.6945	30.7111	32.9091	19.3355	33.8269	24.3732	28.8277	23.0587	22.1005	36.4329	12.0588	27.0183	22.4518	35.5043	30.3896	41.4576	16.8238	36.6263
ENSG00000219642.2	0.163394	0.346252	0.123743	0.127146	0.141285	0.0192178	0	0.123279	0.272311	0.12979	0.0232161	0.0278515	0.105286	0.0977314	0.156403	0.0437845	0.0336273	0.0276156	0.223436	0.069672	0.0148274	0.0402418	0.465604	0.18179	0.268752	0.274744	0.0871375	0.0353674	0.0202116	0.118413	0.114789	0.167182	0.151533	0.134353	0.0735649	0.0949349	0.133758	0.093765	0.112837	0	0	0.0363398	0.121768	0	0.0808521	0.0302995	0.56277	0.0259192	0.0186136
ENSG00000248285.1	0	0	0	0	0	0	0	0	0	0	0	0	0	0	0	0	0	0	0	0	0.108193	0	0	0	0	0	0	0	0	0	0	0	0	0	0	0	0	0	0	0	0	0	0	0	0	0	0.171101	0	0
ENSG00000225194.2	0.283069	0.501701	0.563505	0.193839	0.27592	0.392865	0.785487	0.55529	0.516455	0.359766	0.281542	0.33454	0.486405	0.575666	0.508568	0.424781	0.233029	0.440149	0.493538	0.318654	0.184951	0.659982	0.260203	0.281593	0.436945	0.579451	0.452881	0.441157	0.315138	0.348742	0.507107	0.477895	0.271272	0.446894	0.152936	0.186398	0.494351	0.69618	1.02768	0	0.0550561	0.0251826	0.0843821	0.124986	0.112057	0.0419936	0.0243741	0.0898068	0.0322469
ENSG00000255910.1	0	0	0	0	0.0285862	0	0	0	0.0318981	0.0262604	0.0258351	0.0206623	0	0.0362523	0.0267765	0	0	0.0204873	0.0310803	0.0620256	0.0330003	0	0	0	0	0	0	0	0	0.0658855	0	0	0	0	0	0	0.0330772	0	0	0	0	0.0808789	0	0	0.0599822	0	0	0	0
ENSG00000259293.1	0	0	0	0	0	0	0.0191034	0	0	0.00845136	0	0.00664973	0	0	0.00861745	0	0	0	0.0100025	0	0	0	0	0.00765945	0	0.0171123	0	0.0126663	0.00723849	0	0.0102775	0	0.00904488	0	0	0	0	0	0.0115459	0	0	0	0.0373795	0	0	0	0	0	0
ENSG00000149136.6	22.1979	27.4774	22.9993	18.3931	15.4156	15.8529	23.8172	25.3237	20.3275	31.0095	27.3154	14.4695	21.1762	22.9046	19.8853	20.5681	23.7309	25.2788	23.925	24.2463	15.9486	26.3714	21.6705	27.4525	26.4684	26.6965	24.128	23.7849	20.9353	20.7314	23.7233	23.1328	22.9939	23.1299	26.7315	21.4775	22.0818	29.3234	25.3761	37.5245	46.5899	44.2306	65.5138	45.4911	22.9878	50.3636	39.9216	37.6196	47.5405
ENSG00000243853.1	0	0	0	0	0	0	0	0	0.0663849	0	0	0	0	0	0	0	0	0	0	0	0	0	0	0	0	0	0	0	0	0	0	0	0	0	0	0	0	0	0	0	0	0	0	0	0	0	0	0	0
ENSG00000223877.4	0	0	0	0	0.0659964	0	0	0.031672	0	0.060627	0	0	0.0450824	0	0	0	0.0287977	0.0236493	0	0.0357993	0	0.0344622	0	0.0549461	0	0	0.0279835	0	0	0	0	0.0536892	0	0.0345169	0	0.0406501	0	0.0344135	0	0	0	0	0	0	0	0	0	0	0
ENSG00000256136.1	0	0	0	0	0	0	0	0	0	0	0	0	0	0	0	0	0	0	0	0	0	0	0	0	0	0	0	0	0	0	0	0	0	0	0	0	0	0	0	0	0	0	0	0	0	0	0	0	0
ENSG00000159256.11	5.623	4.63526	5.34733	6.21458	4.93263	3.52965	4.4994	5.60134	5.5327	4.52543	5.02241	4.75071	4.8267	5.15871	5.09141	4.01538	4.83304	5.74117	4.8859	4.5278	5.0842	5.71345	5.68566	5.08273	5.25852	4.42962	5.37546	5.02948	4.48585	4.41093	5.15263	5.83157	4.08117	4.65374	5.22474	4.53761	5.75205	5.54504	6.02973	1.4739	4.50407	5.08394	5.95607	3.48577	3.81072	3.58908	4.87101	4.76369	3.61827
ENSG00000276283.1	0	0	0	0	0	0	0	0	0	0	0	0	0	0	0	0	0	0	0	0	0	0	0	0	0	0	0	0	0	0	0	0	0	0	0	0	0	0	0	0	0	0	0	0	0	0	0	0	0
ENSG00000273258.1	0.0405188	0	0	0.113508	0	0	0	0.0550279	0.0639743	0.0526676	0	0.0414401	0.156655	0.145414	0	0	0	0	0	0.0621988	0.066185	0.0598756	0.0670422	0	0	0.106641	0.0486193	0.0394673	0.0451091	0	0	0	0	0	0	0	0	0	0.143905	0	0	0	0	0	0	0	0	0	0
ENSG00000271142.1	0	0	0	0	0	0	0	0.0299392	0	0	0	0.0225464	0.0426159	0	0.0292181	0	0	0	0	0	0	0	0.0364759	0.02597	0	0.0290103	0	0.0429462	0	0	0	0	0	0	0	0	0	0.0325307	0	0	0	0	0	0	0.0654517	0	0	0.0314733	0.0452045
ENSG00000234850.1	0	0	0	0	0	0	0	0	0	0	0	0	0	0	0	0	0	0	0	0	0	0	0	0	0	0	0	0	0	0	0	0	0	0	0	0	0	0	0	0	0	0	0	0	0	0	0	0	0
ENSG00000266478.1	0	0	0	0	0	0	0	0	0	0	0	0	0	0	0	0	0	0	0	0	0	0	0	0	0	0	0	0	0	0	0	0	0	0	0	0	0	0	0	0	0	0	0	0	0	0	0	0	0
ENSG00000003147.16	8.55633	8.08353	7.93864	8.19195	1.20019	3.86466	5.01484	7.24602	7.38921	9.05934	5.51824	6.39406	8.74891	6.00304	8.20358	5.59698	10.236	8.08728	8.44536	5.84109	6.92757	9.24297	7.76319	10.8972	10.3579	6.95485	9.34877	6.25722	6.96348	4.78281	8.74787	5.41443	7.77295	9.04697	6.24918	7.9663	6.57468	6.03512	12.0974	3.05314	8.7218	27.4149	10.8213	11.9329	23.2551	12.1764	2.12216	8.48533	21.0237
ENSG00000241684.4	0.120346	0.121718	0.0683563	0.10114	0.743572	0.127392	0.0648252	0.193404	0.158343	0.0990721	0.0436039	0.049233	0.108567	0.197954	0.13292	0.145121	0.0470591	0.073224	0.265368	0.15087	0.0655261	0.0711354	0.471261	0.0567087	0.0867923	0.266588	0.16366	0.0547041	0.109417	0.546188	0.0380462	0.54488	0.0446441	0.127653	0.669709	0.325144	0.32511	0.150949	0.231518	0.0529445	0.0175552	0.00802974	0.0307499	0	0.0595509	0	0	0.0314994	0.00411291
ENSG00000249305.1	0	0	0	0	0	0	0	0	0	0	0	0	0	0	0	0	0	0	0	0	0	0	0	0	0	0	0	0	0	0	0	0	0	0	0	0	0	0	0	0	0	0	0	0	0	0	0	0	0
ENSG00000267218.2	0.0308961	0	0.0451258	0	0	0	0.0226941	0.0209798	0	0.0200799	0	0.0315986	0	0	0	0.0186282	0	0.0156655	0	0	0	0	0	0	0.017591	0.0203288	0	0	0.0171982	0	0.0244187	0	0	0.0228643	0.0250387	0	0	0.0227957	0.0274324	0.679615	0.045069	0.0618435	0	0.15347	0	0.154692	0	0	0.0316769
ENSG00000136490.7	2.5343	2.37989	8.84671	2.05534	1.02949	1.60184	6.3368	1.7811	2.39888	4.89554	3.02189	3.92071	3.58124	3.47786	2.22036	1.7879	5.02069	2.46767	4.51956	2.87197	2.11725	6.70395	4.16289	3.09353	2.07127	3.04133	1.94416	2.54	2.04543	1.13654	10.6069	2.71662	3.11299	3.50662	4.82614	2.14744	4.66981	13.8717	3.36577	4.81477	3.69239	2.63125	3.16937	3.43187	3.85744	3.24491	0.758109	4.15935	0.579847
ENSG00000224799.1	0.0225244	0.0390536	0	0.063099	0.127484	0.0238432	0.0992693	0.03059	0.0711267	0.0292779	0.0288038	0	0	0	0.0895599	0.0271613	0.0834418	0.0228415	0.103955	0.0345764	0	0.0332849	0.0372688	0.0265345	0.025649	0.0296409	0.0270275	0	0.100305	0.0367281	0.0356043	0.0518551	0.0940022	0.100013	0.0365083	0	0.036878	0.132952	0.0799969	0	0.065714	0.180345	0.129493	0.223771	0	0	0.581849	0.0964726	0.415685
ENSG00000263595.2	0	0	0	0	0	0	0	0	0	0	0	0	0	0	0	0	0	0	0	0	0	0	0	0	0	0	0.0590024	0	0	0	0	0	0	0	0	0	0	0	0.0873187	0	0	0	0	0	0	0	0	0	0
ENSG00000278011.1	0.0868606	0	0.169154	0.121664	0.0614517	0.0919464	0.0638018	0.353892	0.342856	0	0.0555378	0	0.167912	0.155863	0.230246	0.209484	0.0536292	0.132125	0.0668133	0.200005	0.141882	0.256712	0.0718596	0.204649	0.148365	0	0.312678	0.12691	0.0483505	0.141634	0	0.0999841	0.120833	0	0	0.0757016	0.142212	0.128175	0.462737	0	0	0	0.249682	0.431462	0	0	0.0560945	0.248017	0.178111
ENSG00000234647.1	0.0193754	0.0335937	0.018866	0.0542775	0	0.088876	0.085391	0.0175423	0.0713801	0.0335797	0.140402	0.0264213	0.0374549	0.0579455	0.085599	0.0233641	0.0159503	0.0130987	0.20865	0.0495707	0.0105495	0.0668069	0.309899	0.0912995	0.0367719	0.050994	0.0309986	0.0503269	0.0143803	0.0210622	0.0918801	0.029737	0.0359379	0.0573541	0.0942129	0	0	0.0476518	0.10322	0	0	0.103421	0	0.0641622	0.0383502	0.0215577	0	0	0.0993252
ENSG00000230614.3	0	0	0	0	0	0	0	0.0763566	0.177541	0.0730814	0	0	0	0	0.0745176	0.067798	0	0.11403	0	0	0	0.0830832	0	0	0	0	0	0	0	0	0.0888728	0	0	0	0	0	0	0	0	0	0.16403	0	0	0	0	0	0	0	0
[truncated: 4,620 more rows]
[truncated: 388 more columns]
